# Supplementary material for: Transmembrane signaling molecules play a key role in the pathogenesis of IgA nephropathy: a weighted gene co-expression network analysis study
Source: BMC Immunol. 2021 Dec 3;22:73. doi: 10.1186/s12865-021-00468-y (PMC8642929; doi:10.1186/s12865-021-00468-y)
Supplement: Supplementary file 1 — Additional file 1: The details of all the analyzed datasets and the results of their analysis. [file 12865_2021_468_MOESM1_ESM.xlsx]

## Sheet: Dataset information
Dataset	Main dataset	Validation dataset 1	Validation dataset 2
GEO accession	GSE104948	GSE37460	GSE93798
Status	Public on Jan 24, 2018	Public on Dec 10, 2012	Public on Jul 03, 2017
Organism	Homo sapiens	Homo sapiens	Homo sapiens
Sample type	Glomerular compartment	Glomerular compartment	Glomerular compartment
No of samples	21 healthy and 27 IgAN	27 healthy and 27 IgAN	22 healthy and 20 IgAN
Platform	Affymetrix Human Genome U133A Array	Affymetrix GeneChip Human Genome HG-U133A Custom CDF	Affymetrix Human Genome U133 Plus 2.0 Array

## Sheet: DEGs of GSE93798
DEGs	logFC	AveExpr	t	P.Value	adj.P.Val	B
FOSB	-6.2866	8.0618	-23.623	1.44e-26	2.18e-22	49.449
DUSP1	-2.3717	7.8533	-20.359	5.72e-24	4.33e-20	43.91
PCDH18	1.6094	6.3162	17.397	2.67e-21	1.35e-17	38.092
RNF186	-2.0188	6.6044	-16.656	1.41e-20	5.35e-17	36.5
FOS	-4.6221	8.3258	-16.552	1.79e-20	5.42e-17	36.274
ZFP36	-2.3277	9.4737	-16.01	6.28e-20	1.59e-16	35.065
EGR1	-2.7465	7.8708	-15.926	7.66e-20	1.66e-16	34.874
LYL1	1.1824	6.7048	14.798	1.17e-18	2.21e-15	32.242
CEBPD	-2.2906	9.3058	-14.724	1.41e-18	2.37e-15	32.062
JUN	-2.2495	9.1122	-14.649	1.69e-18	2.57e-15	31.881
CYP27B1	-2.2726	5.6431	-14.433	2.91e-18	4.01e-15	31.357
CSRNP1	-2.1398	8.5385	-13.901	1.13e-17	1.24e-14	30.037
TGIF1	-0.73489	6.4441	-13.9	1.14e-17	1.24e-14	30.034
DEPDC7	-2.4969	4.8531	-13.896	1.15e-17	1.24e-14	30.025
ERRFI1	-1.7254	10.563	-13.537	2.92e-17	2.95e-14	29.115
PPP1R10	-1.037	7.4488	-13.259	6.1e-17	5.78e-14	28.396
SOX17	1.7392	6.6492	13.217	6.82e-17	6.08e-14	28.287
ETNK2	-1.0022	5.7947	-13.177	7.58e-17	6.38e-14	28.184
KLF4	-2.2196	6.8238	-13.111	9.04e-17	7.21e-14	28.012
ATF3	-2.094	6.6278	-12.943	1.42e-16	1.08e-13	27.571
COL1A2	2.3943	7.5431	12.919	1.51e-16	1.09e-13	27.509
GATA3	1.8876	8.0246	12.894	1.62e-16	1.12e-13	27.441
APOLD1	-3.7689	8.9671	-12.873	1.72e-16	1.13e-13	27.385
CALHM2	0.95286	5.8333	12.799	2.1e-16	1.32e-13	27.191
SLC19A2	-1.6571	6.8793	-12.756	2.36e-16	1.43e-13	27.075
C8orf4	1.6572	10.082	12.741	2.45e-16	1.43e-13	27.037
FPR3	1.3506	4.5172	12.683	2.87e-16	1.61e-13	26.882
EMP3	1.0689	7.9501	12.627	3.36e-16	1.82e-13	26.73
IRF2BP2	-0.74021	9.7674	-12.592	3.7e-16	1.93e-13	26.636
TIPARP	-1.7719	9.3995	-12.459	5.32e-16	2.69e-13	26.28
PDE4D	-0.83027	5.9768	-12.35	7.2e-16	3.52e-13	25.984
PER1	-1.6654	7.7025	-12.327	7.67e-16	3.63e-13	25.922
NR4A2	-2.4428	5.3963	-12.16	1.22e-15	5.62e-13	25.465
JUNB	-1.8793	7.839	-12.118	1.37e-15	6.13e-13	25.35
CARD6	0.77972	8.8638	12.096	1.46e-15	6.33e-13	25.29
USP2	-0.90406	6.0302	-12.043	1.7e-15	7.15e-13	25.143
PRCP	0.65888	10.726	11.998	1.93e-15	7.89e-13	25.02
GUCY1A3	1.0403	7.9108	11.958	2.15e-15	8.59e-13	24.91
GDF15	-1.8884	5.8325	-11.77	3.68e-15	1.43e-12	24.385
TNFRSF4	0.54302	4.6845	11.722	4.22e-15	1.6e-12	24.251
RHOB	-0.75532	7.7336	-11.648	5.21e-15	1.93e-12	24.043
ARHGEF15	0.9928	7.8385	11.55	6.9e-15	2.43e-12	23.768
LDLRAP1	0.87789	7.2279	11.54	7.11e-15	2.43e-12	23.739
RASD1	-2.6309	8.3752	-11.554	6.82e-15	2.43e-12	23.779
CD44	1.0504	6.5225	11.535	7.2e-15	2.43e-12	23.726
FXYD5	1.1111	6.7011	11.509	7.77e-15	2.56e-12	23.651
EPB41L5	-0.60231	7.0723	-11.452	9.16e-15	2.92e-12	23.489
RAPH1	0.88309	8.3619	11.449	9.24e-15	2.92e-12	23.481
NETO2	1.0229	6.481	11.361	1.19e-14	3.69e-12	23.23
BHLHE40	-1.738	6.9871	-11.335	1.28e-14	3.89e-12	23.158
PARD6B	-0.76051	5.3137	-11.327	1.32e-14	3.91e-12	23.134
ZBTB46	0.52756	7.7243	11.29	1.46e-14	4.21e-12	23.029
JUND	-0.65883	6.2158	-11.288	1.47e-14	4.21e-12	23.023
BRE-AS1	-2.648	5.749	-11.28	1.51e-14	4.24e-12	22.999
KCNK5	-1.8214	6.3613	-11.25	1.64e-14	4.53e-12	22.915
GSTA3	-1.4833	5.3387	-11.228	1.75e-14	4.75e-12	22.851
PDE4B	-1.2156	7.1731	-11.204	1.88e-14	5.01e-12	22.782
NR4A1	-2.1708	7.4795	-11.195	1.93e-14	5.04e-12	22.757
SYNPO2	1.0415	7.7999	11.096	2.58e-14	6.64e-12	22.471
KLF6	-1.416	9.0166	-11.079	2.72e-14	6.87e-12	22.421
ARPC2	0.38168	10.844	11.019	3.24e-14	8.04e-12	22.25
PHLDA1	-1.6108	7.692	-11.006	3.36e-14	8.18e-12	22.211
CD69	-2.8406	6.9363	-11.002	3.4e-14	8.18e-12	22.201
SPRY2	-1.5134	8.0049	-10.985	3.58e-14	8.29e-12	22.15
PTGS1	1.4817	6.6814	10.983	3.61e-14	8.29e-12	22.143
LDLRAD4	0.8046	6.2428	10.982	3.61e-14	8.29e-12	22.142
RASL11B	-1.2282	10.477	-10.941	4.08e-14	9.09e-12	22.022
NR1H4	-1.1252	5.3151	-10.945	4.03e-14	9.09e-12	22.033
CBR3	0.90902	6.3716	10.935	4.15e-14	9.11e-12	22.006
LPCAT1	0.61631	8.1824	10.93	4.21e-14	9.12e-12	21.99
BTG2	-1.3159	8.1851	-10.919	4.35e-14	9.29e-12	21.958
DDR2	0.61715	5.9809	10.898	4.63e-14	9.74e-12	21.898
COL4A1	0.96813	10.088	10.884	4.82e-14	1e-11	21.858
KLF9	-1.1503	7.4977	-10.867	5.08e-14	1.04e-11	21.806
GJC1	0.74641	4.9442	10.831	5.64e-14	1.14e-11	21.702
RDH10	-1.1195	6.8738	-10.774	6.7e-14	1.34e-11	21.534
SRPX2	1.0933	4.1618	10.76	6.98e-14	1.37e-11	21.493
SNAI2	1.2786	9.1973	10.755	7.09e-14	1.38e-11	21.479
NFIL3	-1.6699	8.1304	-10.745	7.3e-14	1.4e-11	21.45
PDK4	-1.9189	10.321	-10.684	8.75e-14	1.66e-11	21.271
CTH	-1.0408	5.3063	-10.614	1.08e-13	2.02e-11	21.064
TRIB1	-0.97039	4.8795	-10.565	1.25e-13	2.28e-11	20.919
MAOA	-0.98388	8.3325	-10.567	1.24e-13	2.28e-11	20.925
MECOM	1.2209	8.8493	10.553	1.3e-13	2.34e-11	20.884
FN1	1.4591	7.3526	10.505	1.49e-13	2.58e-11	20.744
IL16	0.4583	5.4211	10.512	1.47e-13	2.58e-11	20.762
PCK1	-1.8846	9.8278	-10.505	1.5e-13	2.58e-11	20.742
FBLIM1	0.55616	5.1532	10.516	1.45e-13	2.58e-11	20.776
TBX3	0.84095	7.5719	10.496	1.54e-13	2.62e-11	20.716
CEBPA	0.90431	5.4322	10.457	1.73e-13	2.92e-11	20.6
MARVELD1	0.72893	8.0897	10.446	1.79e-13	2.98e-11	20.568
SLC22A5	-0.89119	6.9146	-10.431	1.87e-13	3.08e-11	20.523
ENG	0.86599	8.1832	10.401	2.05e-13	3.34e-11	20.434
ATOH8	-1.5336	8.1959	-10.382	2.17e-13	3.5e-11	20.375
NPDC1	0.79786	8.2247	10.374	2.23e-13	3.55e-11	20.352
PID1	0.77248	4.3124	10.363	2.3e-13	3.63e-11	20.321
RNF32	-0.37187	3.7432	-10.352	2.38e-13	3.71e-11	20.287
CD34	1.0233	8.5642	10.326	2.57e-13	3.98e-11	20.21
PLD6	-1.2047	6.1723	-10.311	2.69e-13	4.12e-11	20.165
STK17B	0.90132	6.9902	10.299	2.79e-13	4.24e-11	20.128
A2M	0.67215	12.243	10.285	2.92e-13	4.38e-11	20.085
RNF180	-0.53462	5.9909	-10.268	3.07e-13	4.56e-11	20.036
LINC00473	-2.3804	4.9106	-10.254	3.2e-13	4.71e-11	19.994
TGFBI	1.2344	7.5848	10.249	3.25e-13	4.74e-11	19.978
NEDD9	-0.91999	8.3421	-10.203	3.74e-13	5.4e-11	19.84
COL5A2	1.1009	6.0295	10.183	3.98e-13	5.69e-11	19.78
ADGRA2	0.8	7.027	10.151	4.39e-13	6.21e-11	19.683
SYT11	1.1557	6.1386	10.146	4.46e-13	6.25e-11	19.668
CYSLTR1	1.1035	5.921	10.14	4.53e-13	6.31e-11	19.651
IP6K3	-2.3091	6.5861	-10.117	4.86e-13	6.7e-11	19.583
ING1	-0.93811	6.7536	-10.075	5.53e-13	7.55e-11	19.456
MEF2A	0.44771	8.3691	10.069	5.63e-13	7.62e-11	19.438
RUNDC3B	-1.212	4.51	-9.985	7.29e-13	9.78e-11	19.182
ESM1	-2.0902	8.6449	-9.9791	7.43e-13	9.79e-11	19.164
CPNE4	-1.5372	6.7252	-9.9804	7.4e-13	9.79e-11	19.168
HN1	0.59925	7.078	9.9165	9.01e-13	1.18e-10	18.974
UPB1	-0.95455	6.2084	-9.8778	1.02e-12	1.31e-10	18.856
ANKRD50	0.70147	7.1398	9.8761	1.02e-12	1.31e-10	18.851
FBXO21	-0.66253	10.612	-9.868	1.05e-12	1.33e-10	18.827
MPZL1	0.38371	7.0477	9.8422	1.13e-12	1.43e-10	18.748
SHANK2	-0.88292	6.5579	-9.8251	1.2e-12	1.5e-10	18.696
NFKBIZ	-1.6855	8.1836	-9.8118	1.25e-12	1.55e-10	18.655
SOWAHC	-1.3607	8.0319	-9.8071	1.26e-12	1.56e-10	18.641
LAMC1	0.51372	9.2588	9.7961	1.31e-12	1.6e-10	18.607
MARCKS	0.99733	6.132	9.7625	1.45e-12	1.76e-10	18.504
EPB41L2	0.64916	7.6263	9.742	1.55e-12	1.86e-10	18.441
HLX	1.2965	7.4326	9.729	1.61e-12	1.92e-10	18.401
KCTD15	0.58814	5.8394	9.7234	1.64e-12	1.94e-10	18.384
ST3GAL2	0.43698	6.563	9.689	1.82e-12	2.14e-10	18.279
KIAA0355	0.64372	9.7865	9.6737	1.91e-12	2.23e-10	18.232
LOC400043	0.88759	8.0448	9.668	1.95e-12	2.25e-10	18.214
CRYM	-1.4871	8.5822	-9.6649	1.97e-12	2.26e-10	18.205
SYNM	0.81475	8.4418	9.6418	2.11e-12	2.39e-10	18.133
CD84	0.55168	3.9009	9.6445	2.1e-12	2.39e-10	18.142
ECM1	1.7325	8.6817	9.6039	2.38e-12	2.65e-10	18.017
GSTA1	-2.1	10.239	-9.606	2.36e-12	2.65e-10	18.023
KIAA1671	0.47734	8.2915	9.5889	2.49e-12	2.76e-10	17.97
MMP2	1.1117	6.1688	9.5576	2.75e-12	3.02e-10	17.874
CMBL	-1.2897	6.2051	-9.5516	2.8e-12	3.06e-10	17.855
MRAS	0.6312	7.4042	9.5475	2.84e-12	3.07e-10	17.843
VNN1	-1.4171	5.5545	-9.5455	2.86e-12	3.07e-10	17.836
RHPN2	-0.84945	7.3541	-9.5374	2.93e-12	3.13e-10	17.811
SLC23A1	-1.337	5.8004	-9.5342	2.96e-12	3.14e-10	17.802
CCDC80	0.95581	6.5889	9.5191	3.1e-12	3.27e-10	17.755
CYFIP1	0.37991	10.745	9.5118	3.17e-12	3.32e-10	17.732
ZNF331	-1.5184	7.1728	-9.4655	3.67e-12	3.81e-10	17.589
GUSB	0.57803	10.332	9.4599	3.74e-12	3.85e-10	17.572
BCL2L13	-0.34028	6.6667	-9.4153	4.3e-12	4.4e-10	17.433
HIP1	0.4895	6.2292	9.3493	5.29e-12	5.38e-10	17.228
LOC101928841	-0.59322	4.9586	-9.341	5.43e-12	5.49e-10	17.202
WDR72	-1.1448	6.2117	-9.331	5.61e-12	5.63e-10	17.171
NUP58	-1.0286	4.5752	-9.3038	6.11e-12	6.09e-10	17.086
LOC148413	0.43307	7.6452	9.3	6.18e-12	6.13e-10	17.074
CXorf21	0.9078	4.3548	9.2946	6.29e-12	6.19e-10	17.057
ARG2	-1.119	7.5799	-9.2856	6.47e-12	6.33e-10	17.029
CRTAM	1.4051	3.7083	9.28	6.59e-12	6.4e-10	17.012
HOXB6	0.93694	6.5435	9.2669	6.87e-12	6.63e-10	16.971
C6orf47	0.43124	8.2345	9.2545	7.14e-12	6.85e-10	16.932
LOC727944	-1.2921	5.6483	-9.2525	7.19e-12	6.85e-10	16.926
MAP4K4	0.5218	7.5448	9.236	7.57e-12	7.18e-10	16.874
RAB31	0.53292	9.7564	9.2279	7.77e-12	7.32e-10	16.849
FOSL2	-1.098	6.7084	-9.2019	8.44e-12	7.9e-10	16.767
GADD45B	-1.3675	9.1639	-9.188	8.82e-12	8.2e-10	16.724
FBN1	0.65165	5.2981	9.1684	9.38e-12	8.64e-10	16.663
NRP1	0.61382	8.1755	9.1677	9.41e-12	8.64e-10	16.66
LFNG	0.45761	5.4978	9.1613	9.6e-12	8.75e-10	16.64
MGST1	-1.387	7.198	-9.1601	9.63e-12	8.75e-10	16.637
TUBB	0.59281	8.5919	9.1573	9.72e-12	8.76e-10	16.628
NR4A3	-1.4939	4.5042	-9.156	9.76e-12	8.76e-10	16.624
LMO2	0.63749	11.062	9.1518	9.89e-12	8.81e-10	16.611
UGT2A3	-1.436	6.1788	-9.1449	1.01e-11	8.81e-10	16.589
LINC00597	0.62642	3.1741	9.1496	9.96e-12	8.81e-10	16.603
GPR65	1.1547	4.8879	9.1463	1.01e-11	8.81e-10	16.593
FMNL3	0.70956	6.0339	9.1476	1e-11	8.81e-10	16.597
GNB4	0.55381	6.4186	9.1384	1.03e-11	8.94e-10	16.568
DDC	-1.1545	7.4871	-9.1344	1.05e-11	9.01e-10	16.556
AK4	-1.1574	8.9814	-9.1116	1.12e-11	9.63e-10	16.484
SGK223	1.0052	5.8881	9.1059	1.15e-11	9.64e-10	16.466
TSPAN17	0.51597	6.3975	9.1089	1.13e-11	9.64e-10	16.476
C3AR1	1.2814	7.0662	9.1067	1.14e-11	9.64e-10	16.469
GGTA1P	0.95858	5.1111	9.0891	1.21e-11	1.01e-09	16.413
ANKRD33B	-1.339	9.5016	-9.0573	1.34e-11	1.11e-09	16.313
ZNFX1	0.58011	8.6454	9.0533	1.35e-11	1.12e-09	16.301
CDO1	1.0748	5.888	9.0499	1.37e-11	1.13e-09	16.29
DCBLD2	-0.41744	7.5757	-9.0482	1.38e-11	1.13e-09	16.285
HOOK1	-0.78615	6.9516	-9.037	1.43e-11	1.16e-09	16.249
RASSF5	0.44792	6.6242	9.0301	1.46e-11	1.18e-09	16.228
TGFA	-0.33603	4.3782	-9.0242	1.49e-11	1.2e-09	16.209
CXCL16	0.66677	8.2209	9.0165	1.52e-11	1.22e-09	16.185
HPD	-2.3238	7.9019	-9.0124	1.54e-11	1.23e-09	16.172
PCOLCE	0.88531	5.6505	9.0041	1.58e-11	1.26e-09	16.146
ALDH6A1	-1.0591	8.9953	-8.9967	1.62e-11	1.28e-09	16.122
PKP2	-0.49848	4.3716	-8.9946	1.63e-11	1.28e-09	16.116
GNG11	0.67399	10.43	8.9856	1.68e-11	1.31e-09	16.087
CISH	-0.72948	6.1586	-8.9813	1.7e-11	1.32e-09	16.074
HSPB8	-0.77744	9.7882	-8.9722	1.75e-11	1.36e-09	16.045
TOP2A	1.2159	3.5411	8.966	1.79e-11	1.38e-09	16.025
FNDC1	1.0211	3.389	8.9551	1.85e-11	1.42e-09	15.991
CYB561D1	0.58965	7.2606	8.9355	1.97e-11	1.48e-09	15.929
CXCL2	-3.0492	6.5619	-8.9405	1.94e-11	1.48e-09	15.945
RTN1	1.1387	5.2163	8.9382	1.96e-11	1.48e-09	15.938
NPAS3	-0.55237	7.1208	-8.9348	1.98e-11	1.48e-09	15.927
NFKBIA	-0.93923	10.313	-8.9274	2.03e-11	1.51e-09	15.903
SHMT1	-1.1895	6.8458	-8.9179	2.09e-11	1.55e-09	15.873
C11orf54	-0.98657	9.2854	-8.904	2.18e-11	1.61e-09	15.829
SH3RF3	0.72631	7.0365	8.8938	2.26e-11	1.66e-09	15.797
IFNAR1	0.32815	7.6491	8.8869	2.31e-11	1.68e-09	15.775
SPARC	0.28908	12.157	8.8872	2.3e-11	1.68e-09	15.776
FERMT3	0.70467	6.5058	8.883	2.34e-11	1.69e-09	15.763
SLAIN1	-0.77297	4.9497	-8.8773	2.38e-11	1.72e-09	15.745
GIMAP4	0.68777	9.2444	8.8645	2.48e-11	1.78e-09	15.704
INAFM2	0.73782	7.4643	8.858	2.53e-11	1.81e-09	15.684
TSC22D3	-1.0186	10.621	-8.8506	2.59e-11	1.84e-09	15.66
NRARP	1.4272	7.4689	8.8442	2.64e-11	1.87e-09	15.64
SH3GL2	-1.3023	5.0998	-8.8314	2.76e-11	1.94e-09	15.599
CDR2L	0.54142	6.5754	8.8174	2.88e-11	2.02e-09	15.555
RRM2	1.6277	4.5614	8.8079	2.97e-11	2.08e-09	15.524
PCDH17	0.98134	7.3633	8.8024	3.03e-11	2.1e-09	15.507
CD14	1.1582	7.186	8.7973	3.08e-11	2.13e-09	15.491
MCL1	-0.78101	8.2307	-8.7743	3.31e-11	2.26e-09	15.418
ASAP1	0.54062	7.5454	8.7742	3.31e-11	2.26e-09	15.417
IRF2BPL	-0.3375	12.107	-8.778	3.27e-11	2.26e-09	15.429
ID4	-1.0033	8.514	-8.7691	3.37e-11	2.29e-09	15.401
LRRC19	-1.6451	6.4541	-8.7657	3.41e-11	2.3e-09	15.39
HSPA4L	-0.80975	5.1085	-8.7502	3.58e-11	2.4e-09	15.341
LRP2	-1.287	8.6616	-8.7519	3.56e-11	2.4e-09	15.346
KIAA1211L	-0.71095	6.6006	-8.7384	3.72e-11	2.48e-09	15.303
CEBPB	-1.5867	9.5472	-8.7367	3.74e-11	2.49e-09	15.298
ACMSD	-1.905	7.2586	-8.7339	3.77e-11	2.49e-09	15.289
TWIST1	1.2747	5.6132	8.7355	3.75e-11	2.49e-09	15.294
GJA5	0.71589	8.9914	8.7302	3.82e-11	2.51e-09	15.277
LPAR6	1.2419	9.1735	8.723	3.91e-11	2.55e-09	15.254
SNX30	-0.66191	7.5164	-8.7152	4.01e-11	2.61e-09	15.229
PYCARD	0.90421	6.7858	8.7036	4.16e-11	2.7e-09	15.192
NTAN1	0.55888	8.1698	8.6968	4.25e-11	2.74e-09	15.171
SH3YL1	-0.72772	6.9906	-8.6923	4.32e-11	2.77e-09	15.156
TNFAIP8L1	0.93494	7.4044	8.6875	4.38e-11	2.79e-09	15.141
APOC1	1.5688	5.7575	8.688	4.38e-11	2.79e-09	15.143
TNFAIP3	-1.7776	7.856	-8.6737	4.58e-11	2.91e-09	15.097
GAREM1	-0.62466	7.0893	-8.6713	4.62e-11	2.92e-09	15.089
GIPC2	-1.2458	5.9666	-8.6581	4.82e-11	3.03e-09	15.047
DNAJB1	-2.0411	7.4941	-8.6528	4.9e-11	3.07e-09	15.03
JAG2	0.85398	7.1165	8.6347	5.2e-11	3.24e-09	14.973
SNRK	0.50936	10.467	8.6318	5.25e-11	3.26e-09	14.963
NOTCH3	0.56015	5.69	8.6261	5.35e-11	3.31e-09	14.945
CSF1R	1.3754	6.9571	8.6161	5.52e-11	3.38e-09	14.913
ANGPTL2	0.48115	5.6114	8.6167	5.51e-11	3.38e-09	14.915
MMEL1	0.64381	6.3117	8.6164	5.52e-11	3.38e-09	14.914
PPIC	0.54269	8.4288	8.6076	5.68e-11	3.46e-09	14.886
CNST	-0.64829	6.8331	-8.6022	5.78e-11	3.5e-09	14.869
KLHDC8B	0.58728	7.5016	8.5933	5.95e-11	3.58e-09	14.84
ZFPM2	-0.93756	7.0612	-8.5926	5.96e-11	3.58e-09	14.838
ARHGAP45	0.53801	6.3615	8.5802	6.2e-11	3.72e-09	14.798
SLC7A9	-1.9377	7.9211	-8.5692	6.43e-11	3.84e-09	14.763
PRLR	-0.72203	4.6519	-8.5669	6.48e-11	3.85e-09	14.755
TMEM44	0.71489	5.9607	8.562	6.58e-11	3.9e-09	14.74
CLEC7A	0.47364	3.9467	8.5523	6.79e-11	4.01e-09	14.709
RAMP2	0.94431	8.235	8.5436	6.99e-11	4.09e-09	14.681
TCIRG1	0.7568	7.4704	8.5421	7.02e-11	4.09e-09	14.676
FABP1	-1.7671	7.1696	-8.5435	6.99e-11	4.09e-09	14.68
C1orf54	0.6068	9.3525	8.5352	7.18e-11	4.17e-09	14.654
COL3A1	1.384	9.2589	8.5251	7.42e-11	4.29e-09	14.621
SULT1C2	-1.2038	6.5411	-8.5208	7.52e-11	4.34e-09	14.608
ZNF521	-0.74268	6.3826	-8.5171	7.61e-11	4.37e-09	14.596
SLC2A2	-1.8948	5.835	-8.4926	8.25e-11	4.72e-09	14.517
RSBN1	-0.41313	7.1404	-8.4849	8.45e-11	4.82e-09	14.493
GMFG	0.64102	8.8299	8.4783	8.64e-11	4.9e-09	14.471
BIRC5	0.35108	4.1678	8.4711	8.84e-11	5e-09	14.448
PATJ	-0.41969	4.6726	-8.4687	8.91e-11	5.02e-09	14.44
LINC01279	1.3614	5.4713	8.4612	9.13e-11	5.13e-09	14.416
FMN2	-0.5343	8.3086	-8.45	9.47e-11	5.3e-09	14.38
NME5	-0.8333	7.4587	-8.4439	9.66e-11	5.36e-09	14.361
NAPSA	-1.0725	6.6452	-8.4448	9.63e-11	5.36e-09	14.364
ESRRG	-1.0547	6.4357	-8.4392	9.81e-11	5.43e-09	14.345
ANK2	-1.1817	7.211	-8.4021	1.11e-10	6.1e-09	14.226
GNG2	0.85468	5.6176	8.4009	1.11e-10	6.1e-09	14.222
DOCK6	0.56321	6.8022	8.3976	1.12e-10	6.15e-09	14.212
ITPKB	0.51409	5.7882	8.3778	1.2e-10	6.54e-09	14.148
CITED2	-0.74562	8.4782	-8.3762	1.2e-10	6.55e-09	14.143
AK1	0.52557	7.2115	8.3588	1.28e-10	6.9e-09	14.087
SLC17A1	-1.3961	5.8631	-8.352	1.3e-10	7.03e-09	14.065
GOLGA3	0.30199	8.1193	8.3364	1.37e-10	7.32e-09	14.014
ALDH8A1	-1.5944	8.617	-8.3371	1.37e-10	7.32e-09	14.016
GKAP1	-0.75837	6.2883	-8.338	1.36e-10	7.32e-09	14.02
WBP2NL	-0.73849	4.4504	-8.3331	1.39e-10	7.36e-09	14.004
CD58	0.61765	7.7552	8.3326	1.39e-10	7.36e-09	14.002
CLEC5A	1.2202	3.2289	8.3238	1.43e-10	7.52e-09	13.974
GLS	-0.52203	8.5628	-8.3249	1.42e-10	7.52e-09	13.977
ZCCHC24	0.60453	8.2764	8.3213	1.44e-10	7.55e-09	13.966
GIMAP6	0.63331	9.4737	8.3205	1.44e-10	7.55e-09	13.963
TMEM252	-1.2492	6.0329	-8.3009	1.54e-10	8.03e-09	13.9
PLEKHH2	-0.7296	6.266	-8.2909	1.59e-10	8.27e-09	13.867
OSBPL3	0.68868	5.2746	8.2864	1.62e-10	8.36e-09	13.853
MN1	1.139	5.9856	8.2843	1.63e-10	8.39e-09	13.846
PKN3	0.71588	5.8679	8.2801	1.65e-10	8.48e-09	13.833
PCF11	-0.76569	8.1139	-8.2771	1.67e-10	8.53e-09	13.823
FAM199X	-0.49961	7.0802	-8.2752	1.68e-10	8.56e-09	13.817
ACADL	-1.0387	4.8605	-8.2462	1.84e-10	9.38e-09	13.723
F2RL2	0.58316	3.8421	8.2427	1.86e-10	9.45e-09	13.712
BHMT2	-1.3637	8.1192	-8.2353	1.91e-10	9.65e-09	13.688
PECAM1	0.62535	9.7154	8.2232	1.99e-10	1e-08	13.648
C3orf70	0.939	6.9415	8.2186	2.02e-10	1.01e-08	13.634
ALB	-1.9383	5.0157	-8.189	2.22e-10	1.11e-08	13.538
NOS3	0.69451	5.3135	8.1891	2.22e-10	1.11e-08	13.538
AEBP1	1.154	9.0171	8.1721	2.35e-10	1.16e-08	13.483
CD86	0.87578	4.1649	8.1752	2.33e-10	1.16e-08	13.493
PTP4A1	-0.57115	7.0687	-8.161	2.44e-10	1.2e-08	13.447
RASGRF2	0.72882	6.5837	8.1564	2.47e-10	1.22e-08	13.432
FLRT3	-0.64866	10.617	-8.1489	2.54e-10	1.24e-08	13.408
TMEM232	-0.61068	3.5813	-8.1505	2.52e-10	1.24e-08	13.413
CACNB3	0.6321	6.3764	8.1445	2.57e-10	1.25e-08	13.393
CD180	0.60172	4.4197	8.133	2.67e-10	1.29e-08	13.356
ABCC1	0.39066	8.6053	8.1357	2.65e-10	1.29e-08	13.365
ATG16L2	0.58467	5.8142	8.133	2.67e-10	1.29e-08	13.356
COL4A2	0.79035	9.0447	8.1258	2.74e-10	1.32e-08	13.333
SLC17A3	-2.0968	7.2906	-8.1158	2.83e-10	1.36e-08	13.3
NINL	-0.72084	6.2639	-8.1076	2.91e-10	1.39e-08	13.273
HGD	-1.1241	6.9889	-8.1029	2.95e-10	1.4e-08	13.259
ACVRL1	0.54347	7.3707	8.1029	2.95e-10	1.4e-08	13.258
SLC3A2	-0.53023	8.2036	-8.1005	2.97e-10	1.41e-08	13.251
WEE1	-0.69882	6.6386	-8.0906	3.07e-10	1.45e-08	13.218
AFM	-1.783	5.9311	-8.079	3.19e-10	1.5e-08	13.181
ESAM	0.57099	8.3529	8.0782	3.2e-10	1.5e-08	13.178
BMP7	-0.49385	7.4286	-8.0727	3.26e-10	1.52e-08	13.16
CLIC2	0.66621	6.5699	8.0658	3.33e-10	1.55e-08	13.138
MAFF	-1.9104	8.8564	-8.0674	3.32e-10	1.55e-08	13.143
PEAK1	0.6551	8.1526	8.0618	3.38e-10	1.57e-08	13.125
TMEM140	0.69731	8.2375	8.0553	3.45e-10	1.59e-08	13.104
ZNF189	-1.0332	8.5836	-8.0543	3.46e-10	1.6e-08	13.101
KHK	-1.0601	7.4092	-8.05	3.51e-10	1.61e-08	13.086
TCF4	0.5061	8.3838	8.0368	3.67e-10	1.68e-08	13.043
TOB1	-0.55905	9.6185	-8.0332	3.71e-10	1.69e-08	13.032
SLC40A1	0.61087	10.241	8.0334	3.71e-10	1.69e-08	13.032
SFXN2	-0.87807	8.1863	-8.0267	3.79e-10	1.72e-08	13.011
PROCR	0.6627	6.3686	8.0168	3.92e-10	1.76e-08	12.978
CYP8B1	-1.2692	5.6885	-8.0179	3.9e-10	1.76e-08	12.982
KCNMB1	0.89259	4.7339	8.017	3.92e-10	1.76e-08	12.979
PLIN2	-0.8296	9.6854	-8.0091	4.02e-10	1.79e-08	12.953
SHE	0.64807	7.4	8.0108	4e-10	1.79e-08	12.959
DUSP6	-1.013	8.4488	-8.009	4.02e-10	1.79e-08	12.953
ACTN1	0.84953	6.8508	7.9974	4.18e-10	1.86e-08	12.915
BAG3	-1.06	8.7838	-7.9949	4.21e-10	1.87e-08	12.907
A1CF	-1.0745	5.5009	-7.9926	4.24e-10	1.88e-08	12.899
JADE1	-0.57301	8.2955	-7.9906	4.27e-10	1.88e-08	12.893
SLC25A25	-0.93375	6.8398	-7.9873	4.32e-10	1.89e-08	12.882
SLCO3A1	0.58108	7.0638	7.9888	4.3e-10	1.89e-08	12.887
IL33	0.99425	3.3542	7.9871	4.32e-10	1.89e-08	12.882
CALD1	0.33163	9.6634	7.9844	4.36e-10	1.9e-08	12.873
APOL1	0.52272	8.9108	7.9818	4.4e-10	1.91e-08	12.864
UNC5B	0.60492	7.4258	7.9779	4.45e-10	1.92e-08	12.852
MCAM	0.59315	6.3885	7.9787	4.44e-10	1.92e-08	12.854
LINC00886	-0.74793	5.9414	-7.9784	4.45e-10	1.92e-08	12.853
DUSP16	-0.36263	7.1255	-7.9731	4.53e-10	1.94e-08	12.836
ACADSB	-0.61118	7.6793	-7.9705	4.56e-10	1.95e-08	12.827
MFNG	0.68992	5.8006	7.9703	4.57e-10	1.95e-08	12.827
PBLD	-1.1032	7.3549	-7.9623	4.69e-10	2e-08	12.801
ASS1	-1.0659	10.481	-7.957	4.77e-10	2.03e-08	12.784
SLC22A11	-1.303	5.9496	-7.9543	4.82e-10	2.04e-08	12.774
RASGRP2	0.4734	4.926	7.952	4.85e-10	2.05e-08	12.767
KLF15	-0.52587	6.5258	-7.9478	4.92e-10	2.07e-08	12.754
DANCR	-0.64794	8.5182	-7.9476	4.92e-10	2.07e-08	12.753
EMP2	0.39435	8.671	7.944	4.98e-10	2.09e-08	12.741
PHACTR3	-2.1031	8.2869	-7.9402	5.04e-10	2.11e-08	12.729
TMEM173	0.58498	7.2164	7.9287	5.24e-10	2.18e-08	12.691
CRIP1	1.0603	7.0633	7.9267	5.27e-10	2.19e-08	12.685
MTERF1	0.64124	7.1362	7.9215	5.37e-10	2.22e-08	12.668
KLF10	-0.83444	10.705	-7.9126	5.53e-10	2.28e-08	12.639
PLEKHG2	0.30072	5.1676	7.9101	5.57e-10	2.3e-08	12.63
FXYD6	0.61939	9.2443	7.9068	5.63e-10	2.31e-08	12.62
HOXC9	0.53853	6.866	7.9048	5.67e-10	2.32e-08	12.613
EZR	-0.55276	8.6286	-7.9012	5.74e-10	2.35e-08	12.601
SLC7A8	-0.58032	8.7579	-7.8917	5.92e-10	2.41e-08	12.57
TMEM223	0.68961	7.7052	7.8839	6.08e-10	2.47e-08	12.545
NR3C1	0.43936	9.1326	7.8782	6.19e-10	2.5e-08	12.526
HADH	-0.60058	8.0944	-7.8786	6.18e-10	2.5e-08	12.528
PLEKHA8P1	0.83595	5.3971	7.8776	6.21e-10	2.5e-08	12.524
MBNL3	-0.47382	6.6251	-7.88	6.16e-10	2.5e-08	12.532
SLFN5	0.5399	5.7943	7.8664	6.44e-10	2.58e-08	12.488
COL1A1	1.6685	5.2074	7.8616	6.54e-10	2.62e-08	12.472
ICMT	0.30967	8.4553	7.8461	6.89e-10	2.74e-08	12.421
ZNF770	-0.48102	6.7148	-7.8466	6.88e-10	2.74e-08	12.423
HOXA11	0.44215	4.9002	7.8429	6.96e-10	2.76e-08	12.411
DAAM2	0.66583	8.8971	7.8365	7.11e-10	2.81e-08	12.39
USH1C	-1.0128	6.308	-7.8332	7.19e-10	2.82e-08	12.379
SLCO4C1	-1.4359	6.7848	-7.8336	7.18e-10	2.82e-08	12.38
PHYH	-0.68815	10.369	-7.8341	7.17e-10	2.82e-08	12.382
MRO	-1.3468	5.3777	-7.8313	7.23e-10	2.83e-08	12.373
SDC1	-1.1216	7.2467	-7.8261	7.36e-10	2.87e-08	12.356
NPY5R	0.92992	4.4881	7.8234	7.43e-10	2.89e-08	12.347
CCL8	1.1987	4.2899	7.8208	7.49e-10	2.91e-08	12.338
PROX1	-0.58822	3.7009	-7.8189	7.54e-10	2.92e-08	12.332
GLA	0.59415	8.226	7.8156	7.62e-10	2.95e-08	12.321
CPED1	0.60584	5.9509	7.8149	7.64e-10	2.95e-08	12.319
HEG1	0.6242	10.505	7.8087	7.8e-10	2.99e-08	12.299
UCP2	1.0984	6.749	7.8091	7.79e-10	2.99e-08	12.3
CRELD2	0.47991	9.1167	7.802	7.97e-10	3.05e-08	12.277
SPATA6	-0.37701	6.0586	-7.8006	8.01e-10	3.06e-08	12.272
INSR	-0.43437	8.0926	-7.7881	8.35e-10	3.18e-08	12.231
DIO1	-1.8735	7.4093	-7.7855	8.42e-10	3.19e-08	12.223
TMEM45A	0.66724	7.8127	7.7863	8.4e-10	3.19e-08	12.226
APOM	-1.1947	7.6594	-7.7813	8.54e-10	3.23e-08	12.209
G6PC	-1.0845	5.6762	-7.7759	8.69e-10	3.28e-08	12.191
PPTC7	-0.56324	7.5403	-7.7734	8.76e-10	3.3e-08	12.183
PPP1R15A	-1.0892	7.4852	-7.7694	8.88e-10	3.33e-08	12.17
HMCES	-0.39991	7.7011	-7.7659	8.99e-10	3.36e-08	12.159
SLC27A2	-2.0062	8.6283	-7.7568	9.26e-10	3.46e-08	12.129
CCM2L	0.897	7.8627	7.7497	9.48e-10	3.53e-08	12.105
MT1HL1	-0.53822	5.6728	-7.7473	9.56e-10	3.55e-08	12.098
SOX18	1.039	4.6041	7.7461	9.59e-10	3.56e-08	12.094
FAM110C	-0.86776	7.2182	-7.7372	9.88e-10	3.65e-08	12.065
AMOTL1	0.43817	6.8082	7.7348	9.96e-10	3.67e-08	12.057
GPAT3	-1.4532	9.1859	-7.734	9.99e-10	3.67e-08	12.054
CD79B	0.60275	5.7305	7.7352	9.95e-10	3.67e-08	12.058
TRIM9	0.69332	3.8398	7.7306	1.01e-09	3.69e-08	12.043
RSU1	0.36554	8.441	7.7305	1.01e-09	3.69e-08	12.043
DPYS	-1.9837	8.0065	-7.7285	1.02e-09	3.71e-08	12.036
GUCY1A2	0.5147	4.9128	7.7265	1.02e-09	3.72e-08	12.029
TMEM200A	1.4245	8.3913	7.7255	1.03e-09	3.73e-08	12.026
LIMS2	0.5183	8.3195	7.7225	1.04e-09	3.76e-08	12.016
COL15A1	1.654	5.5352	7.7186	1.05e-09	3.8e-08	12.004
NOX4	-0.97501	8.6636	-7.7175	1.06e-09	3.8e-08	12
ENTPD1	0.43772	4.246	7.7041	1.1e-09	3.96e-08	11.956
PTRF	0.46645	7.9229	7.6964	1.13e-09	4.01e-08	11.931
IGF1R	-0.35004	7.7289	-7.6973	1.13e-09	4.01e-08	11.934
MT1X	-1.2772	7.6412	-7.6976	1.13e-09	4.01e-08	11.935
PITPNA	0.36445	8.355	7.6991	1.12e-09	4.01e-08	11.94
SNRPA	0.55332	7.3272	7.6994	1.12e-09	4.01e-08	11.94
IRS2	-0.56582	8.4955	-7.6981	1.13e-09	4.01e-08	11.936
AZGP1	-1.7802	7.1256	-7.6885	1.16e-09	4.11e-08	11.905
GIMAP1	0.65639	7.827	7.6859	1.17e-09	4.13e-08	11.896
TNS1	0.40764	8.2024	7.684	1.18e-09	4.15e-08	11.89
PDZK1IP1	-0.8512	10.101	-7.6823	1.19e-09	4.16e-08	11.884
LRRC8C	0.57796	7.2274	7.6796	1.2e-09	4.19e-08	11.876
CXorf57	-0.82454	4.8883	-7.6777	1.2e-09	4.21e-08	11.869
DNAJB4	-0.74019	8.7604	-7.6733	1.22e-09	4.26e-08	11.855
ZFP36L2	-0.45081	6.3251	-7.6718	1.23e-09	4.27e-08	11.85
SLFN12	0.71756	5.8595	7.6661	1.25e-09	4.34e-08	11.831
NKIRAS2	0.32468	7.2113	7.6612	1.27e-09	4.4e-08	11.815
KIAA1462	0.60294	7.0862	7.6546	1.3e-09	4.49e-08	11.794
ALDOB	-1.5042	11.027	-7.6428	1.35e-09	4.66e-08	11.755
MANF	0.4095	9.5567	7.6408	1.36e-09	4.68e-08	11.748
EIF3G	0.43413	9.4462	7.6249	1.44e-09	4.93e-08	11.696
PCDH12	0.59208	8.1845	7.6234	1.44e-09	4.94e-08	11.691
MMP25	-0.31093	4.6278	-7.6218	1.45e-09	4.95e-08	11.686
C16orf72	-0.3445	8.3754	-7.6192	1.46e-09	4.99e-08	11.677
MT1F	-0.99794	9.7268	-7.6159	1.48e-09	5.03e-08	11.666
PFKFB2	-0.45837	4.9132	-7.6139	1.49e-09	5.05e-08	11.66
TSC22D2	-0.51898	4.6036	-7.6127	1.5e-09	5.06e-08	11.656
PLXND1	0.52107	8.9448	7.607	1.52e-09	5.15e-08	11.637
VAV1	0.74702	4.7744	7.6053	1.53e-09	5.16e-08	11.631
PPP1R15B	-0.81881	8.6082	-7.596	1.58e-09	5.31e-08	11.601
GIMAP7	0.74109	10.257	7.5909	1.61e-09	5.39e-08	11.584
COL12A1	0.6728	5.9878	7.5859	1.64e-09	5.47e-08	11.568
MEF2C	0.57664	7.9957	7.5849	1.64e-09	5.48e-08	11.564
ADGRE5	0.80132	6.523	7.5699	1.72e-09	5.75e-08	11.515
CLK1	-0.83949	8.2873	-7.566	1.75e-09	5.8e-08	11.502
LOC286437	0.71869	8.2481	7.5661	1.75e-09	5.8e-08	11.503
BAMBI	0.89716	9.5568	7.5616	1.77e-09	5.87e-08	11.488
UBA7	0.54925	8.0966	7.5607	1.78e-09	5.87e-08	11.485
DENND5A	0.3873	8.3092	7.558	1.79e-09	5.91e-08	11.476
ROBO3	0.48268	5.5116	7.5501	1.84e-09	6.06e-08	11.45
EBF1	0.71237	7.8767	7.5467	1.86e-09	6.11e-08	11.439
CRYAB	-0.5049	10.973	-7.546	1.87e-09	6.12e-08	11.436
GOT1	-0.81658	7.9904	-7.5424	1.89e-09	6.18e-08	11.425
ATP13A3	0.71434	8.3367	7.5395	1.91e-09	6.22e-08	11.415
CPNE2	0.69356	8.6738	7.5373	1.92e-09	6.26e-08	11.408
PIK3CG	0.52782	4.0159	7.5356	1.93e-09	6.28e-08	11.402
AQP6	-0.50564	4.7197	-7.5302	1.97e-09	6.36e-08	11.384
DDIT4	-1.4918	9.3585	-7.5309	1.96e-09	6.36e-08	11.387
CYB5A	-0.4227	10.969	-7.5257	2e-09	6.45e-08	11.37
CASP10	0.44852	5.3825	7.521	2.03e-09	6.53e-08	11.354
SLC4A4	-1.1094	6.8737	-7.518	2.05e-09	6.59e-08	11.344
CRYL1	-0.78121	8.4762	-7.5073	2.13e-09	6.81e-08	11.309
RRAS2	-0.33447	7.9422	-7.506	2.13e-09	6.83e-08	11.305
RBP5	-1.2121	7.6924	-7.5028	2.16e-09	6.89e-08	11.294
SIK2	-0.68388	6.5394	-7.4898	2.25e-09	7.16e-08	11.251
ENY2	-0.34764	7.9129	-7.4898	2.25e-09	7.16e-08	11.251
GMPPB	0.52428	6.5983	7.4877	2.27e-09	7.2e-08	11.244
GPC4	-0.54028	7.2904	-7.478	2.34e-09	7.42e-08	11.212
FAM212A	0.60648	6.0058	7.4757	2.36e-09	7.46e-08	11.205
PER2	-0.656	6.8871	-7.4694	2.41e-09	7.6e-08	11.184
EIF1B	-0.3425	10.335	-7.4591	2.5e-09	7.76e-08	11.15
CNRIP1	0.71137	9.0533	7.462	2.47e-09	7.76e-08	11.159
LIPA	0.54879	10.093	7.4597	2.49e-09	7.76e-08	11.152
PSMB10	0.56201	7.4599	7.4598	2.49e-09	7.76e-08	11.152
RBM10	0.38596	8.0523	7.4595	2.49e-09	7.76e-08	11.151
ASAP2	0.42974	8.9587	7.462	2.47e-09	7.76e-08	11.159
IQSEC1	0.45763	8.7173	7.4599	2.49e-09	7.76e-08	11.153
NOCT	-0.93317	4.7803	-7.4564	2.52e-09	7.81e-08	11.141
DOCK10	0.8514	6.6195	7.4525	2.55e-09	7.9e-08	11.128
PTER	-0.6736	6.3898	-7.4503	2.57e-09	7.94e-08	11.121
VASH1	0.45574	5.3102	7.4474	2.6e-09	8e-08	11.112
NRG1	-0.3203	4.2039	-7.4469	2.6e-09	8e-08	11.11
ARPC1B	0.56799	8.2329	7.4417	2.65e-09	8.12e-08	11.093
SLC8B1	0.31691	5.8297	7.4391	2.67e-09	8.17e-08	11.084
ADAP2	0.66357	5.9283	7.434	2.72e-09	8.28e-08	11.067
BCAT1	0.8325	4.4652	7.4339	2.72e-09	8.28e-08	11.067
SLC13A3	-1.0852	7.3044	-7.4302	2.75e-09	8.37e-08	11.055
CDC37L1	-0.6495	6.8988	-7.4289	2.76e-09	8.39e-08	11.05
FBP1	-1.2917	8.5361	-7.4252	2.8e-09	8.48e-08	11.038
GHR	-0.60696	9.8205	-7.423	2.82e-09	8.52e-08	11.031
SPG7	0.29305	6.6744	7.4175	2.87e-09	8.67e-08	11.013
ZBTB38	-0.38342	8.0004	-7.4132	2.91e-09	8.77e-08	10.999
EMILIN1	0.71331	4.8599	7.4078	2.96e-09	8.9e-08	10.981
HLA-DPA1	0.78166	10.801	7.4064	2.98e-09	8.9e-08	10.976
LASP1	0.32507	9.0675	7.4065	2.98e-09	8.9e-08	10.976
SLC1A1	-0.90489	5.842	-7.4082	2.96e-09	8.9e-08	10.982
GADD45G	-1.2393	6.163	-7.3994	3.05e-09	9.1e-08	10.953
DMGDH	-1.4452	6.8668	-7.3979	3.06e-09	9.12e-08	10.948
IL12RB1	0.53991	5.1642	7.3973	3.07e-09	9.12e-08	10.946
VIL1	-0.87298	4.9984	-7.3898	3.15e-09	9.34e-08	10.921
DUSP2	-1.1885	5.9507	-7.3828	3.22e-09	9.52e-08	10.898
TMEM27	-1.6113	8.8187	-7.3828	3.22e-09	9.52e-08	10.898
ARID5B	-0.53393	6.1129	-7.3759	3.3e-09	9.73e-08	10.875
TET2	-0.68761	7.2937	-7.3699	3.36e-09	9.9e-08	10.856
MIDN	-0.63098	5.1008	-7.369	3.37e-09	9.91e-08	10.853
SPATA17	-0.74364	4.3874	-7.3656	3.41e-09	1e-07	10.841
GCN1	0.31808	7.1763	7.3558	3.53e-09	1.03e-07	10.809
EMILIN2	0.42564	5.6929	7.3517	3.58e-09	1.04e-07	10.796
SFXN3	0.44969	8.0354	7.3494	3.6e-09	1.05e-07	10.788
PPARGC1A	-1.0905	7.5795	-7.3395	3.73e-09	1.07e-07	10.755
ARC	-1.5602	5.3963	-7.3401	3.72e-09	1.07e-07	10.757
GPX3	-0.7868	12.541	-7.3439	3.67e-09	1.07e-07	10.77
CDK14	-0.31523	6.7303	-7.3442	3.67e-09	1.07e-07	10.771
ANKS1B	-1.4322	5.7807	-7.34	3.72e-09	1.07e-07	10.757
DNAJC22	-0.68714	4.7808	-7.343	3.68e-09	1.07e-07	10.767
CTHRC1	1.4793	5.7427	7.3366	3.76e-09	1.08e-07	10.745
TM4SF18	0.45959	9.0469	7.3366	3.76e-09	1.08e-07	10.745
TRUB1	-0.28867	5.2563	-7.3345	3.79e-09	1.08e-07	10.739
MYO9B	0.33167	5.626	7.3344	3.79e-09	1.08e-07	10.738
CLRN3	-1.6921	6.8137	-7.3289	3.86e-09	1.1e-07	10.72
CYP39A1	-0.55738	5.2479	-7.3294	3.85e-09	1.1e-07	10.722
EIF1	-0.34897	11.34	-7.3233	3.93e-09	1.11e-07	10.702
KCNJ12	0.63624	5.5496	7.3253	3.91e-09	1.11e-07	10.708
JPH1	-0.86699	5.989	-7.3268	3.89e-09	1.11e-07	10.713
ALDH18A1	0.35578	6.8006	7.3225	3.94e-09	1.12e-07	10.699
PRKCDBP	0.65895	6.4569	7.3186	4e-09	1.13e-07	10.686
FRZB	0.87306	7.6922	7.3179	4e-09	1.13e-07	10.684
GBP2	0.73074	6.7051	7.3171	4.02e-09	1.13e-07	10.681
SOX6	-0.40133	7.605	-7.3158	4.03e-09	1.13e-07	10.677
XPNPEP2	-1.4415	6.7892	-7.3058	4.17e-09	1.17e-07	10.644
FOXS1	0.43128	4.6002	7.3001	4.25e-09	1.19e-07	10.625
FAM69B	0.55135	5.523	7.2971	4.29e-09	1.2e-07	10.615
HOXA13	0.73983	3.4256	7.296	4.31e-09	1.2e-07	10.611
PGF	0.9604	5.6925	7.2935	4.35e-09	1.21e-07	10.603
ATL3	0.29229	6.8945	7.2906	4.39e-09	1.22e-07	10.594
CRNDE	0.61341	6.4413	7.2886	4.42e-09	1.22e-07	10.587
KLHL15	-0.6031	8.7705	-7.2826	4.51e-09	1.24e-07	10.567
NMI	0.53965	8.291	7.2838	4.49e-09	1.24e-07	10.571
E2F3	0.4558	6.7478	7.2787	4.57e-09	1.26e-07	10.554
ADCY4	0.74088	7.6908	7.2769	4.6e-09	1.26e-07	10.548
DUSP22	0.45979	8.6907	7.2771	4.59e-09	1.26e-07	10.549
CYB561A3	0.47126	7.7076	7.2711	4.68e-09	1.28e-07	10.529
GGACT	-0.6956	5.5023	-7.2726	4.66e-09	1.28e-07	10.534
CYR61	-1.1924	8.9844	-7.2663	4.76e-09	1.3e-07	10.513
MAN1B1	0.3484	7.1561	7.2636	4.8e-09	1.31e-07	10.504
HCLS1	1.0296	7.2228	7.2639	4.8e-09	1.31e-07	10.505
IGSF21	0.65862	4.0656	7.2634	4.81e-09	1.31e-07	10.503
IER2	-0.96836	10.49	-7.2622	4.83e-09	1.31e-07	10.5
ZNF641	0.48196	6.5528	7.2573	4.91e-09	1.33e-07	10.483
FGD5	0.49061	8.1373	7.2564	4.92e-09	1.33e-07	10.48
NDUFA12	0.36449	10.675	7.2545	4.95e-09	1.34e-07	10.474
CELSR1	-0.3558	4.232	-7.2515	5e-09	1.35e-07	10.464
BAIAP2	-0.48676	6.0312	-7.2491	5.04e-09	1.36e-07	10.456
TOB2	-0.92188	7.0067	-7.2466	5.09e-09	1.36e-07	10.448
EXPH5	-0.60013	9.7129	-7.2465	5.09e-09	1.36e-07	10.447
AP1M2	-0.68727	6.6271	-7.2454	5.11e-09	1.37e-07	10.444
ARRDC2	-1.6241	8.8666	-7.242	5.17e-09	1.38e-07	10.433
ACO1	-0.65523	8.4231	-7.2415	5.17e-09	1.38e-07	10.431
ANTXR2	0.57083	7.4617	7.2384	5.23e-09	1.39e-07	10.421
ITM2A	0.60154	8.6576	7.2392	5.21e-09	1.39e-07	10.423
OLFML3	1.1164	5.9407	7.2294	5.39e-09	1.43e-07	10.391
TDO2	0.52811	3.0118	7.2288	5.4e-09	1.43e-07	10.389
SFRP2	1.2747	4.0927	7.2249	5.47e-09	1.44e-07	10.376
TLN2	-0.95544	6.5867	-7.226	5.45e-09	1.44e-07	10.379
TRIM56	0.44695	8.3992	7.2175	5.61e-09	1.48e-07	10.352
ZBTB43	-0.39333	6.4864	-7.2139	5.68e-09	1.49e-07	10.34
CASKIN2	0.46778	6.7738	7.2122	5.71e-09	1.5e-07	10.334
C12orf66	-0.3753	4.2714	-7.2062	5.82e-09	1.52e-07	10.314
PANK2	0.40569	8.906	7.2063	5.82e-09	1.52e-07	10.314
ENPP6	-1.5354	5.1688	-7.2025	5.9e-09	1.53e-07	10.302
ZDHHC20	0.3652	6.8938	7.2035	5.88e-09	1.53e-07	10.305
SERTAD1	-0.89357	8.8921	-7.2018	5.91e-09	1.53e-07	10.299
MRC2	0.91149	8.7691	7.2021	5.91e-09	1.53e-07	10.301
NPY1R	0.74086	9.1863	7.2007	5.93e-09	1.54e-07	10.296
RORA	-0.44823	6.8753	-7.1984	5.98e-09	1.55e-07	10.288
TRIM7	0.30361	4.5381	7.19	6.15e-09	1.59e-07	10.26
HSPA5	0.43059	9.6517	7.1874	6.2e-09	1.6e-07	10.252
GAL3ST4	0.63857	5.6145	7.1862	6.23e-09	1.6e-07	10.248
SH3PXD2A	0.4156	6.1869	7.1835	6.29e-09	1.62e-07	10.239
TRIOBP	0.32535	8.0806	7.1796	6.37e-09	1.63e-07	10.226
ICAM2	0.61523	8.3457	7.1782	6.4e-09	1.63e-07	10.221
ACADM	-0.56027	8.6805	-7.1786	6.39e-09	1.63e-07	10.223
LAIR1	0.52428	4.9431	7.1802	6.36e-09	1.63e-07	10.228
TMEM38B	-0.61928	7.0218	-7.1783	6.4e-09	1.63e-07	10.221
TFB2M	-0.48374	7.1667	-7.1781	6.4e-09	1.63e-07	10.221
TMEM192	-0.54211	7.461	-7.1747	6.47e-09	1.64e-07	10.21
IL10RB-AS1	0.51888	5.2213	7.1726	6.52e-09	1.65e-07	10.203
PLA2G4A	1.1098	5.5178	7.1731	6.51e-09	1.65e-07	10.205
CSPP1	-0.40069	7.036	-7.1717	6.54e-09	1.65e-07	10.2
ARG1	-1.2229	3.4953	-7.1666	6.65e-09	1.68e-07	10.183
FOXQ1	-1.4404	7.4583	-7.1632	6.73e-09	1.69e-07	10.171
KIAA0922	0.98529	5.7924	7.1588	6.83e-09	1.71e-07	10.157
STK10	0.56507	6.3511	7.1595	6.81e-09	1.71e-07	10.159
ZNF350	0.48571	7.3799	7.1478	7.09e-09	1.78e-07	10.12
TMPRSS2	-0.49388	4.854	-7.1458	7.14e-09	1.79e-07	10.114
CFAP20	-0.45317	9.9394	-7.1433	7.2e-09	1.8e-07	10.106
STXBP1	0.33991	9.805	7.1428	7.21e-09	1.8e-07	10.104
PPP1R13B	0.49821	7.1105	7.1394	7.29e-09	1.81e-07	10.093
HRG	-1.3244	6.0482	-7.1391	7.3e-09	1.81e-07	10.092
C3orf58	-0.31974	5.7844	-7.1309	7.5e-09	1.86e-07	10.065
ARHGAP4	0.36773	5.4674	7.1282	7.57e-09	1.87e-07	10.056
FGFR2	-0.60621	6.095	-7.1277	7.58e-09	1.88e-07	10.054
UPK1B	-0.62564	4.5709	-7.1267	7.61e-09	1.88e-07	10.05
LOC284454	-1.131	7.8742	-7.1231	7.7e-09	1.9e-07	10.038
ZNF365	0.58961	3.6396	7.1148	7.92e-09	1.94e-07	10.011
KCTD3	-0.51222	7.7771	-7.1167	7.87e-09	1.94e-07	10.017
PLEK	0.98004	5.8084	7.1146	7.92e-09	1.94e-07	10.011
TMTC1	0.53077	8.368	7.1102	8.04e-09	1.97e-07	9.9958
PXDN	0.72888	8.4009	7.103	8.24e-09	2.01e-07	9.9719
ATP13A1	0.44163	6.487	7.1002	8.32e-09	2.03e-07	9.9627
CDKN2C	0.4517	5.7717	7.0986	8.36e-09	2.04e-07	9.9573
RIMS3	0.39812	6.09	7.0945	8.48e-09	2.06e-07	9.9437
CDC42EP4	-0.56727	7.8906	-7.0839	8.79e-09	2.13e-07	9.9087
PLEKHG3	-0.35657	6.4352	-7.083	8.81e-09	2.13e-07	9.9056
TEX9	-0.45984	4.9117	-7.0831	8.81e-09	2.13e-07	9.906
LILRB1	0.62405	5.0395	7.0822	8.84e-09	2.14e-07	9.903
OCIAD2	-0.57642	9.2897	-7.0791	8.93e-09	2.16e-07	9.8927
VEGFC	0.92081	7.6043	7.0765	9.01e-09	2.17e-07	9.8842
COL5A1	0.64093	5.142	7.0693	9.23e-09	2.21e-07	9.8601
CYP3A7	-1.301	4.9563	-7.0699	9.21e-09	2.21e-07	9.8621
SLC22A6	-1.3007	6.7056	-7.0702	9.2e-09	2.21e-07	9.8632
NLRP1	0.26912	4.2741	7.0675	9.29e-09	2.22e-07	9.8541
LUM	2.4012	6.4565	7.0657	9.34e-09	2.23e-07	9.8481
PLS1	-0.86149	5.7634	-7.0584	9.57e-09	2.29e-07	9.8239
RNLS	-0.38705	5.9966	-7.0567	9.63e-09	2.29e-07	9.8183
PPP1R14A	0.96983	7.3524	7.0571	9.61e-09	2.29e-07	9.8198
TACC3	0.51283	5.3203	7.0541	9.71e-09	2.3e-07	9.8097
ALDH2	-0.56557	10.687	-7.0552	9.68e-09	2.3e-07	9.8134
TRHDE	-0.91608	5.8661	-7.0547	9.69e-09	2.3e-07	9.8118
HSPA1A	-0.69201	12.243	-7.0557	9.66e-09	2.3e-07	9.8152
CD4	0.49009	6.5265	7.0518	9.79e-09	2.31e-07	9.8022
IFI30	1.2314	8.8877	7.0486	9.89e-09	2.33e-07	9.7914
FGL2	0.74608	9.1896	7.0464	9.97e-09	2.33e-07	9.7843
TMEM64	-0.37569	7.6704	-7.0436	1.01e-08	2.33e-07	9.775
SUSD3	-0.66129	5.239	-7.0446	1e-08	2.33e-07	9.7781
SIDT2	0.53471	10.148	7.0487	9.89e-09	2.33e-07	9.7917
CHDH	-0.55881	5.3433	-7.0467	9.96e-09	2.33e-07	9.7851
PRELP	0.76717	6.556	7.0444	1e-08	2.33e-07	9.7775
ELOVL1	0.32738	6.7793	7.0438	1.01e-08	2.33e-07	9.7757
UBASH3B	0.56159	4.6904	7.0449	1e-08	2.33e-07	9.7792
CAMK1	0.50375	6.5973	7.0487	9.89e-09	2.33e-07	9.7917
SOCS3	-1.1535	5.9961	-7.0452	1e-08	2.33e-07	9.7802
CDK1	0.43538	4.1674	7.0454	1e-08	2.33e-07	9.781
GULP1	-0.43876	9.1796	-7.0369	1.03e-08	2.38e-07	9.7528
SLC16A9	-1.5467	9.1739	-7.031	1.05e-08	2.42e-07	9.733
PIGC	0.34643	8.3989	7.0318	1.05e-08	2.42e-07	9.7356
TYROBP	1.3034	7.4929	7.0309	1.05e-08	2.42e-07	9.7329
RALGPS2	-0.29297	4.5018	-7.0283	1.06e-08	2.44e-07	9.7242
HOXB7	0.45613	7.9546	7.0265	1.07e-08	2.45e-07	9.7181
ADAM12	0.69027	4.6851	7.0215	1.08e-08	2.49e-07	9.7015
ALDH1L1	-0.88963	7.5515	-7.0187	1.09e-08	2.51e-07	9.6921
SDC3	0.29376	6.2601	7.0141	1.11e-08	2.54e-07	9.6771
COL6A2	0.53247	5.2792	7.0093	1.13e-08	2.58e-07	9.6612
AIG1	-0.3237	4.9476	-7.0072	1.14e-08	2.59e-07	9.654
BBOX1	-1.5143	8.8938	-7.0061	1.14e-08	2.6e-07	9.6503
RUSC1	0.58355	7.4388	6.9977	1.17e-08	2.67e-07	9.6225
TSC22D1	-0.32705	6.2105	-6.9937	1.19e-08	2.7e-07	9.6091
SHROOM1	-0.32973	5.7854	-6.9901	1.2e-08	2.73e-07	9.5973
TEAD1	-0.28329	8.7021	-6.9903	1.2e-08	2.73e-07	9.5979
XPR1	-0.42504	6.9441	-6.9861	1.22e-08	2.76e-07	9.5839
ADH6	-0.9741	6.2252	-6.984	1.23e-08	2.77e-07	9.577
AMDHD1	-0.9647	5.1734	-6.9802	1.25e-08	2.81e-07	9.5645
MTHFD1L	0.55957	5.4065	6.9778	1.26e-08	2.82e-07	9.5566
CDKN2AIP	-0.58464	7.3169	-6.9753	1.27e-08	2.84e-07	9.5483
DNAJC12	-0.54428	4.8567	-6.9755	1.27e-08	2.84e-07	9.5487
DAPK2	0.62652	5.8681	6.9673	1.3e-08	2.91e-07	9.5217
CYYR1	0.5846	8.4483	6.9642	1.31e-08	2.94e-07	9.5113
UBTF	0.27237	6.617	6.9636	1.32e-08	2.94e-07	9.5093
MIOX	-1.8326	8.7026	-6.9609	1.33e-08	2.96e-07	9.5002
ITPRIP	-1.0335	6.8749	-6.9604	1.33e-08	2.96e-07	9.4986
SNRNP70	0.40793	8.1607	6.9518	1.37e-08	3.05e-07	9.47
FEZ1	0.42933	6.8946	6.9489	1.38e-08	3.07e-07	9.4603
SH3BGRL3	0.57223	8.474	6.9454	1.4e-08	3.1e-07	9.4487
SLC43A3	0.5143	5.6783	6.9403	1.43e-08	3.15e-07	9.4317
SLC5A12	-1.4691	7.3163	-6.9389	1.43e-08	3.16e-07	9.4273
ENPP3	-0.68876	4.3455	-6.9313	1.47e-08	3.24e-07	9.4019
CLK4	-0.70275	7.6474	-6.9251	1.5e-08	3.3e-07	9.3814
PEBP1	-0.31781	10.435	-6.9129	1.56e-08	3.43e-07	9.3408
COMMD2	0.40563	8.452	6.9136	1.56e-08	3.43e-07	9.3432
MUM1L1	-0.90037	4.3364	-6.9102	1.58e-08	3.46e-07	9.332
DIO3	-0.46826	5.5643	-6.9067	1.6e-08	3.49e-07	9.3202
ARHGAP32	-0.34595	5.2231	-6.9065	1.6e-08	3.49e-07	9.3197
SLC9A3R2	0.5168	5.9093	6.9043	1.61e-08	3.51e-07	9.3123
PPIB	0.35717	9.816	6.8965	1.65e-08	3.6e-07	9.2864
PTPRM	0.38479	9.972	6.8941	1.67e-08	3.63e-07	9.2782
SDPR	-1.2483	7.7166	-6.8894	1.69e-08	3.67e-07	9.2626
Affymetrix	-0.63366	12.721	-6.8897	1.69e-08	3.67e-07	9.2636
SLC13A1	-1.7113	6.5038	-6.8888	1.69e-08	3.68e-07	9.2607
TUBA1B	0.35111	12.133	6.8837	1.72e-08	3.73e-07	9.2437
ITGA11	0.44287	5.0554	6.8822	1.73e-08	3.75e-07	9.2387
NUB1	0.2849	10.519	6.8782	1.76e-08	3.79e-07	9.2254
HHEX	1.065	5.8413	6.8766	1.77e-08	3.81e-07	9.2201
NYNRIN	0.4237	6.2568	6.8751	1.78e-08	3.82e-07	9.2152
EPHB4	0.41712	7.1104	6.8693	1.81e-08	3.89e-07	9.1958
GJA4	1.0921	8.0187	6.8697	1.81e-08	3.89e-07	9.1972
EGFL7	0.52873	6.9404	6.8658	1.83e-08	3.93e-07	9.1844
DNAJC5	0.32169	7.2968	6.8614	1.86e-08	3.98e-07	9.1697
LPP	0.35135	7.8285	6.859	1.87e-08	4.01e-07	9.1616
GATM	-1.4027	10.381	-6.8575	1.88e-08	4.02e-07	9.1566
RCC2	0.58032	7.143	6.8554	1.9e-08	4.04e-07	9.1496
MMRN2	0.47113	6.7097	6.8556	1.9e-08	4.04e-07	9.1505
CCDC85B	0.31861	5.4805	6.8514	1.92e-08	4.09e-07	9.1363
DPEP1	-1.1628	7.7281	-6.8485	1.94e-08	4.12e-07	9.1268
RNF152	-0.84198	5.1062	-6.8469	1.95e-08	4.14e-07	9.1214
UNC13B	0.43917	8.3426	6.846	1.96e-08	4.15e-07	9.1185
ZC3H6	-0.41923	6.707	-6.8453	1.96e-08	4.15e-07	9.116
SSR3	0.27731	7.9543	6.8324	2.05e-08	4.33e-07	9.073
NDC80	1.1518	5.7401	6.8282	2.08e-08	4.38e-07	9.0593
GLYAT	-1.4983	7.365	-6.8242	2.11e-08	4.44e-07	9.046
ADCY3	0.67134	5.7624	6.8233	2.11e-08	4.44e-07	9.0429
IL10RA	1.1915	6.3137	6.8227	2.12e-08	4.44e-07	9.0408
PLG	-1.5416	7.9084	-6.8229	2.12e-08	4.44e-07	9.0417
SLC3A1	-1.0842	10.24	-6.8239	2.11e-08	4.44e-07	9.045
LARP4	-0.37659	6.0964	-6.8196	2.14e-08	4.47e-07	9.0305
KIAA0930	0.34519	7.0958	6.8194	2.14e-08	4.47e-07	9.0299
PIPOX	-1.7023	8.7504	-6.8202	2.14e-08	4.47e-07	9.0327
ELF1	-0.39394	8.8054	-6.8073	2.23e-08	4.65e-07	8.9898
ACE2	-1.6472	6.6642	-6.8009	2.28e-08	4.73e-07	8.9685
SSR2	0.37145	9.374	6.8017	2.27e-08	4.73e-07	8.9712
KAT2A	0.43404	6.2385	6.7959	2.32e-08	4.81e-07	8.9516
GNA15	0.58816	4.7134	6.7941	2.33e-08	4.83e-07	8.9457
GBA3	-1.5106	7.2343	-6.7932	2.34e-08	4.84e-07	8.9427
SLC44A1	0.35519	8.371	6.7883	2.38e-08	4.91e-07	8.9265
TTL	0.3121	7.6764	6.7874	2.39e-08	4.92e-07	8.9236
ARHGEF26	-0.54904	7.8465	-6.7844	2.41e-08	4.97e-07	8.9135
FAM150B	-1.3271	4.9571	-6.7803	2.44e-08	5.03e-07	8.8998
DACT1	0.95278	5.1767	6.7798	2.45e-08	5.03e-07	8.8983
TRIM15	-0.25603	4.554	-6.7789	2.46e-08	5.04e-07	8.8954
TMEM110	0.24463	5.8958	6.7761	2.48e-08	5.07e-07	8.886
IFT57	-0.31464	6.4458	-6.7765	2.48e-08	5.07e-07	8.8872
CENPM	0.38373	4.4249	6.7745	2.49e-08	5.09e-07	8.8805
NARF	0.43691	7.2543	6.7728	2.51e-08	5.12e-07	8.8748
DOK2	0.60981	5.6685	6.7637	2.58e-08	5.27e-07	8.8448
MGAM	-1.3636	7.2288	-6.7626	2.59e-08	5.28e-07	8.841
ADIPOR2	-0.39823	8.5847	-6.7602	2.62e-08	5.32e-07	8.833
TRIM25	0.41635	7.0144	6.7554	2.66e-08	5.4e-07	8.817
NAA10	0.43261	7.9927	6.7526	2.68e-08	5.44e-07	8.8076
PMAIP1	-1.173	4.4671	-6.7508	2.7e-08	5.46e-07	8.8019
AP3M2	0.45063	8.7431	6.7498	2.71e-08	5.48e-07	8.7985
PPCDC	0.58272	6.0154	6.7482	2.72e-08	5.5e-07	8.793
RASL12	0.61205	5.5112	6.747	2.74e-08	5.51e-07	8.789
STAB1	0.57373	6.1406	6.7435	2.77e-08	5.57e-07	8.7774
RHOBTB2	-0.61511	7.061	-6.739	2.81e-08	5.65e-07	8.7626
USHBP1	0.50445	5.749	6.7325	2.87e-08	5.77e-07	8.7409
CHD1	-0.51944	7.724	-6.7266	2.93e-08	5.88e-07	8.7213
GLUL	-0.52852	7.8886	-6.7229	2.97e-08	5.94e-07	8.7088
FREM2	-1.525	5.2884	-6.7151	3.05e-08	6.08e-07	8.6829
IMPA2	-1.0306	8.3835	-6.7151	3.05e-08	6.08e-07	8.683
MLF1	-0.91944	6.4447	-6.7104	3.1e-08	6.17e-07	8.6672
CHKA	-0.35217	5.7315	-6.7065	3.14e-08	6.25e-07	8.6543
KIAA0754	0.95001	3.8279	6.7024	3.18e-08	6.33e-07	8.6406
DTYMK	0.4322	6.8226	6.6988	3.22e-08	6.4e-07	8.6285
LOC101927943	0.62383	3.9982	6.6977	3.23e-08	6.41e-07	8.6252
CLYBL	-0.63343	7.1235	-6.6943	3.27e-08	6.47e-07	8.6137
HSD17B14	-0.59577	6.3567	-6.6941	3.27e-08	6.47e-07	8.6131
CCDC181	-0.73727	5.645	-6.6931	3.28e-08	6.49e-07	8.6097
YWHAB	0.20311	10.905	6.6911	3.3e-08	6.52e-07	8.6032
GATA5	0.76158	7.1432	6.6801	3.43e-08	6.76e-07	8.5666
C10orf10	-1.17	7.842	-6.6783	3.45e-08	6.79e-07	8.5606
TRERF1	0.40639	4.8972	6.6758	3.48e-08	6.84e-07	8.552
ZFAND5	-0.43445	11.12	-6.6746	3.49e-08	6.86e-07	8.5482
CNKSR3	-0.49406	8.8961	-6.6737	3.5e-08	6.87e-07	8.5452
LOC100506498	-1.7656	4.2272	-6.6722	3.52e-08	6.9e-07	8.5402
CROT	0.32769	6.1302	6.67	3.55e-08	6.94e-07	8.5328
LUZP1	0.32693	8.2623	6.6695	3.55e-08	6.94e-07	8.5311
TUBA1A	0.45947	11.869	6.6679	3.57e-08	6.97e-07	8.5259
COL16A1	0.6655	5.3076	6.6654	3.6e-08	7.02e-07	8.5174
NRROS	0.55935	5.2407	6.6651	3.61e-08	7.02e-07	8.5165
KCTD6	-0.39717	5.9575	-6.6625	3.64e-08	7.07e-07	8.508
RFX5	0.41727	7.6189	6.6615	3.65e-08	7.09e-07	8.5047
PLEKHA5	-0.52597	7.4418	-6.6608	3.66e-08	7.1e-07	8.5021
UCHL1	1.2852	8.1451	6.6567	3.71e-08	7.18e-07	8.4887
CCR5	0.69148	5.8369	6.6525	3.76e-08	7.28e-07	8.4747
ANKEF1	-0.36506	5.0359	-6.648	3.82e-08	7.38e-07	8.4596
PPP2R3A	-0.41274	7.1772	-6.6472	3.83e-08	7.39e-07	8.4571
SPTBN1	0.25444	7.1907	6.6466	3.84e-08	7.4e-07	8.4549
MYH10	0.54024	8.5926	6.6438	3.88e-08	7.46e-07	8.4456
MILR1	0.51324	4.3298	6.638	3.95e-08	7.6e-07	8.4262
COLGALT1	0.36011	5.9482	6.6358	3.98e-08	7.64e-07	8.4191
HMBOX1	0.364	8.1969	6.6342	4e-08	7.67e-07	8.4136
ITGA5	0.46875	7.1999	6.6288	4.08e-08	7.8e-07	8.3958
TINAG	-1.2136	7.0339	-6.6267	4.11e-08	7.85e-07	8.3886
MOXD1	1.1361	5.3209	6.624	4.14e-08	7.91e-07	8.3797
CALM3	0.29964	8.0832	6.6235	4.15e-08	7.92e-07	8.378
LOC102723493	-0.98646	4.3074	-6.6208	4.19e-08	7.98e-07	8.3691
SLC47A2	-1.3004	6.7461	-6.6204	4.2e-08	7.98e-07	8.3677
KIAA1191	-0.31197	10.447	-6.6199	4.2e-08	7.98e-07	8.3661
LOC728730	-0.44555	6.2056	-6.6166	4.25e-08	8.06e-07	8.3551
DNM3OS	0.7402	5.6368	6.6138	4.29e-08	8.12e-07	8.3457
PPP4R3A	-0.31335	6.5093	-6.6139	4.29e-08	8.12e-07	8.3462
CMKLR1	0.40616	5.2379	6.6127	4.31e-08	8.13e-07	8.3421
RHBDF1	0.28659	5.934	6.6132	4.3e-08	8.13e-07	8.3437
AFF4	-0.30203	5.8851	-6.6087	4.36e-08	8.23e-07	8.3289
CEMIP	0.28042	3.759	6.608	4.37e-08	8.24e-07	8.3264
TRPV2	0.36153	5.748	6.6072	4.39e-08	8.25e-07	8.3236
PLA2G12B	-0.50114	5.2409	-6.6024	4.46e-08	8.38e-07	8.3077
TMEM18	0.39572	8.1394	6.6016	4.47e-08	8.39e-07	8.3052
PSMB9	0.54822	9.9833	6.5971	4.54e-08	8.51e-07	8.2901
CCNL2	0.36217	6.6136	6.5938	4.59e-08	8.59e-07	8.2791
LEAP2	-0.85168	5.793	-6.5931	4.6e-08	8.6e-07	8.277
DNMT1	0.4646	7.8093	6.5914	4.63e-08	8.63e-07	8.2712
ELL2	-0.77681	8.0712	-6.5914	4.63e-08	8.63e-07	8.2713
FCGBP	0.64371	5.0264	6.5892	4.66e-08	8.68e-07	8.2637
ADARB1	0.31276	5.9634	6.5884	4.67e-08	8.69e-07	8.2613
SNTB2	0.28041	7.0703	6.5844	4.74e-08	8.8e-07	8.2479
MARCKSL1	0.4283	8.0911	6.5822	4.77e-08	8.86e-07	8.2406
MICU2	-0.30869	9.5868	-6.5802	4.81e-08	8.91e-07	8.2338
DEAF1	0.38773	5.4654	6.5777	4.85e-08	8.97e-07	8.2254
TLE2	0.57904	7.1612	6.5768	4.86e-08	8.99e-07	8.2227
CPT1C	0.41136	5.0624	6.5722	4.94e-08	9.12e-07	8.2073
ANXA5	0.41916	10.889	6.5718	4.94e-08	9.12e-07	8.2058
SLC22A4	-0.83432	5.2808	-6.5695	4.98e-08	9.17e-07	8.1984
KYAT1	-0.58049	7.0791	-6.5694	4.98e-08	9.17e-07	8.1979
HSPA12B	0.56389	6.7944	6.5654	5.05e-08	9.28e-07	8.1848
IFI27	0.72095	9.4236	6.5643	5.07e-08	9.31e-07	8.1811
S1PR5	0.29223	4.5174	6.5637	5.08e-08	9.32e-07	8.1788
ECSCR	0.62683	8.1415	6.5589	5.16e-08	9.45e-07	8.1631
ZNF618	0.39999	6.9376	6.5557	5.22e-08	9.52e-07	8.1523
AFAP1L1	0.55451	6.5513	6.5562	5.21e-08	9.52e-07	8.1539
TRIM35	-0.90294	6.8424	-6.5564	5.21e-08	9.52e-07	8.1545
HCST	0.469	5.5473	6.5495	5.33e-08	9.72e-07	8.1316
FAM213B	0.6069	7.9284	6.5486	5.35e-08	9.73e-07	8.1287
IGFBP6	0.8398	6.838	6.5482	5.36e-08	9.74e-07	8.1272
NELFB	0.55104	7.7058	6.5449	5.41e-08	9.83e-07	8.1165
TNFRSF21	0.7738	8.0818	6.5439	5.43e-08	9.85e-07	8.1129
IL2RB	0.63199	5.783	6.5389	5.53e-08	9.98e-07	8.0963
NAGK	0.6093	8.0757	6.5387	5.53e-08	9.98e-07	8.0957
SALL1	-0.66394	7.0744	-6.5397	5.51e-08	9.98e-07	8.0992
LY86	0.61725	5.1027	6.5389	5.53e-08	9.98e-07	8.0962
GPRIN3	0.56956	4.6639	6.5354	5.59e-08	1.01e-06	8.0846
PHF21B	-0.37323	4.5774	-6.5246	5.8e-08	1.04e-06	8.0488
WFDC1	0.92017	8.2786	6.5255	5.78e-08	1.04e-06	8.0517
NUDCD1	-0.53582	7.1698	-6.5257	5.78e-08	1.04e-06	8.0523
SLC25A10	-0.46513	5.5049	-6.5196	5.9e-08	1.06e-06	8.0322
KBTBD11	-0.53462	9.2158	-6.5176	5.94e-08	1.06e-06	8.0253
FAM210A	-0.38057	6.36	-6.5164	5.96e-08	1.07e-06	8.0214
GLRB	0.40659	3.2927	6.5166	5.96e-08	1.07e-06	8.022
MYC	-1.5504	7.0373	-6.5139	6.01e-08	1.07e-06	8.0133
TBC1D20	0.26755	7.927	6.5122	6.05e-08	1.08e-06	8.0076
C1QTNF2	0.34171	3.8024	6.5101	6.09e-08	1.09e-06	8.0005
PARVB	0.46003	5.376	6.5022	6.26e-08	1.11e-06	7.9743
MRLN	-1.4096	4.4804	-6.4974	6.36e-08	1.12e-06	7.9583
SMIM24	-1.3695	9.1059	-6.4999	6.3e-08	1.12e-06	7.9666
PLAGL2	-0.5905	6.3968	-6.4991	6.32e-08	1.12e-06	7.9638
CASP1	0.53883	6.8615	6.4984	6.34e-08	1.12e-06	7.9617
SMIM3	-1.013	7.1834	-6.5007	6.29e-08	1.12e-06	7.9693
SLC22A8	-1.3638	7.8	-6.4965	6.38e-08	1.13e-06	7.9553
LOC100507165	0.41847	3.6616	6.489	6.54e-08	1.15e-06	7.9303
PTPRE	0.52877	5.8169	6.4895	6.53e-08	1.15e-06	7.9319
STOM	0.28769	10.703	6.486	6.61e-08	1.16e-06	7.9201
FAM102B	0.66444	6.0214	6.4818	6.7e-08	1.18e-06	7.9063
PISD	-0.57993	7.3373	-6.4791	6.76e-08	1.19e-06	7.8974
AVPI1	-0.7375	7.0409	-6.4791	6.76e-08	1.19e-06	7.8974
TP53	0.36557	5.3266	6.4791	6.76e-08	1.19e-06	7.8974
SLC47A1	-1.3927	8.0314	-6.474	6.88e-08	1.2e-06	7.8803
LOC101928658	-0.59336	9.2182	-6.4733	6.9e-08	1.21e-06	7.8779
PRAP1	-0.87281	6.1408	-6.4698	6.98e-08	1.22e-06	7.8662
FAM151A	-1.4493	6.742	-6.4675	7.03e-08	1.23e-06	7.8587
ZNF800	-0.33723	5.5729	-6.4633	7.14e-08	1.24e-06	7.8446
LHFPL2	0.58539	5.7274	6.4601	7.21e-08	1.25e-06	7.8341
SLC6A13	-0.75446	6.3662	-6.4614	7.18e-08	1.25e-06	7.8385
RBBP8	-0.78936	9.1653	-6.4547	7.35e-08	1.27e-06	7.8159
ZNF91	-0.35297	7.4146	-6.4569	7.29e-08	1.27e-06	7.8235
IDNK	-0.53761	7.9293	-6.4475	7.53e-08	1.3e-06	7.7922
MGAT1	0.35012	8.5009	6.4464	7.55e-08	1.3e-06	7.7886
TGFB1I1	0.52786	9.3702	6.4474	7.53e-08	1.3e-06	7.7918
PCGF2	0.30184	7.694	6.4475	7.53e-08	1.3e-06	7.7922
PPP1R9A	-0.4744	5.9925	-6.443	7.64e-08	1.32e-06	7.7772
SCARF2	0.33975	4.4214	6.4414	7.69e-08	1.32e-06	7.7717
CD274	-0.70087	6.3212	-6.4406	7.71e-08	1.33e-06	7.769
HENMT1	0.62961	5.147	6.4333	7.9e-08	1.35e-06	7.7447
RHOC	0.49205	9.4152	6.4359	7.83e-08	1.35e-06	7.7534
PIGH	-0.36149	7.9985	-6.4335	7.89e-08	1.35e-06	7.7455
MBD5	-0.59238	7.0692	-6.4308	7.96e-08	1.36e-06	7.7365
CDK2AP1	0.26609	11.038	6.4322	7.93e-08	1.36e-06	7.7413
SFXN1	-0.64166	7.2671	-6.4322	7.93e-08	1.36e-06	7.7412
TNFRSF25	0.19117	4.7207	6.4291	8.01e-08	1.37e-06	7.7308
ACY3	-0.51892	5.0587	-6.427	8.07e-08	1.38e-06	7.7237
PARD6G	-0.31988	5.5959	-6.4246	8.13e-08	1.39e-06	7.7159
KANK1	-0.35304	8.3628	-6.422	8.21e-08	1.4e-06	7.7071
MSR1	0.65438	4.4282	6.4217	8.21e-08	1.4e-06	7.7063
EDNRA	0.83426	6.5698	6.4173	8.34e-08	1.41e-06	7.6914
RAB7B	0.31588	4.3753	6.4186	8.3e-08	1.41e-06	7.6958
LHFP	0.44324	10.167	6.4159	8.38e-08	1.42e-06	7.6868
PDGFRB	0.50902	8.5557	6.4141	8.43e-08	1.42e-06	7.6809
AGXT2	-1.4176	8.8368	-6.4159	8.38e-08	1.42e-06	7.687
BNC1	-1.3487	3.6734	-6.4123	8.48e-08	1.43e-06	7.6749
TRIL	0.92268	4.6462	6.4073	8.62e-08	1.45e-06	7.6584
PSAT1	-1.128	6.3617	-6.4046	8.7e-08	1.46e-06	7.6491
VCP	0.28794	8.4272	6.4054	8.68e-08	1.46e-06	7.652
GK	-0.92782	7.5681	-6.4027	8.76e-08	1.47e-06	7.6428
PSME1	0.32882	10.401	6.4029	8.75e-08	1.47e-06	7.6437
LBH	0.35685	10.074	6.4013	8.8e-08	1.48e-06	7.6384
ZYX	0.52034	7.5234	6.3992	8.86e-08	1.49e-06	7.6311
RFTN1	0.63904	8.6234	6.3876	9.22e-08	1.54e-06	7.5927
PTN	0.99183	7.09	6.3869	9.24e-08	1.54e-06	7.5904
IRGQ	0.25189	6.0604	6.3843	9.32e-08	1.55e-06	7.5816
PIH1D3	-0.35273	3.3912	-6.3847	9.31e-08	1.55e-06	7.5829
TRIM59	0.44646	3.7843	6.3851	9.3e-08	1.55e-06	7.5844
MTMR12	-0.34949	7.2249	-6.3862	9.26e-08	1.55e-06	7.5879
TNKS2	-0.45613	6.5032	-6.3847	9.31e-08	1.55e-06	7.5831
ADAMTSL2	0.36083	4.7274	6.3851	9.3e-08	1.55e-06	7.5844
MAOB	-0.55233	9.3542	-6.3804	9.44e-08	1.57e-06	7.5688
GLYATL1	-1.3605	7.4588	-6.3797	9.47e-08	1.57e-06	7.5662
EHBP1	-0.39253	8.6832	-6.3763	9.58e-08	1.59e-06	7.5551
ANO6	0.40111	9.8751	6.3706	9.76e-08	1.61e-06	7.536
FADS3	0.39642	6.3863	6.3689	9.82e-08	1.62e-06	7.5303
AGMAT	-1.3878	8.9928	-6.3694	9.8e-08	1.62e-06	7.532
ELMSAN1	-0.43852	6.7253	-6.3661	9.91e-08	1.63e-06	7.5213
CDKN1A	-1.2489	9.3209	-6.3631	1e-07	1.64e-06	7.5111
44448	0.34959	7.5741	6.3621	1e-07	1.64e-06	7.5078
ACSL1	-0.5481	8.3821	-6.3636	1e-07	1.64e-06	7.5128
HDAC1	0.39118	9.2072	6.3627	1e-07	1.64e-06	7.5098
PTTG1IP	0.26616	11.316	6.3639	9.99e-08	1.64e-06	7.5138
PLA2G7	1.1618	3.9912	6.3622	1e-07	1.64e-06	7.5082
ENTPD5	-0.85937	5.9488	-6.3655	9.93e-08	1.64e-06	7.5192
PHF13	-0.53738	7.7726	-6.3566	1.02e-07	1.67e-06	7.4894
JMJD1C	-0.28593	7.6185	-6.3534	1.03e-07	1.69e-06	7.4788
CDH11	0.69049	6.2161	6.3517	1.04e-07	1.7e-06	7.4731
AGTR1	0.87091	9.2589	6.3493	1.05e-07	1.71e-06	7.465
PIEZO2	0.5885	6.5241	6.3483	1.05e-07	1.71e-06	7.4617
CACNA1A	0.23165	5.3086	6.349	1.05e-07	1.71e-06	7.4642
DCTN2	0.25744	9.9879	6.3455	1.06e-07	1.73e-06	7.4524
CYBB	1.2559	6.0774	6.3427	1.07e-07	1.74e-06	7.4431
ZNF567	-0.35454	4.5162	-6.3412	1.08e-07	1.74e-06	7.4382
SLC25A34	-0.58544	5.5911	-6.3427	1.07e-07	1.74e-06	7.443
EMID1	0.50604	7.4275	6.3386	1.09e-07	1.76e-06	7.4297
TYMS	0.73004	6.2201	6.339	1.09e-07	1.76e-06	7.431
ABCC2	-0.90449	4.9446	-6.3366	1.1e-07	1.77e-06	7.4228
CLCF1	-0.47084	5.8331	-6.3349	1.1e-07	1.78e-06	7.4171
IL6R	-0.92702	7.2249	-6.3315	1.11e-07	1.79e-06	7.4059
CCND1	0.72612	8.5646	6.3314	1.12e-07	1.79e-06	7.4054
MEIS2	0.61131	10.261	6.3296	1.12e-07	1.8e-06	7.3997
RUNX1T1	0.55363	6.582	6.3285	1.13e-07	1.8e-06	7.3958
CALML4	-0.70617	6.6934	-6.3303	1.12e-07	1.8e-06	7.402
ZSWIM6	-0.43678	9.1206	-6.325	1.14e-07	1.82e-06	7.3845
BEX2	-0.46128	10.066	-6.3249	1.14e-07	1.82e-06	7.3841
HSPC324	0.7292	6.3795	6.3213	1.15e-07	1.84e-06	7.3721
NXPH2	-0.98259	5.2048	-6.3213	1.15e-07	1.84e-06	7.372
PRODH2	-0.87352	8.5046	-6.3224	1.15e-07	1.84e-06	7.3755
ROBO4	0.39323	7.2848	6.3149	1.18e-07	1.88e-06	7.3508
SLC6A6	0.35962	6.035	6.3122	1.19e-07	1.89e-06	7.3418
KIF20A	0.80663	3.3695	6.3069	1.21e-07	1.92e-06	7.3241
EML3	0.33435	6.4894	6.3068	1.21e-07	1.92e-06	7.3238
FUT6	-0.38646	5.3863	-6.3054	1.22e-07	1.93e-06	7.3189
MIRLET7BHG	0.36327	5.2132	6.3038	1.22e-07	1.94e-06	7.3137
PRAF2	0.49469	7.6409	6.301	1.24e-07	1.95e-06	7.3044
GPT2	-0.75227	6.2581	-6.3008	1.24e-07	1.95e-06	7.3037
LONRF1	-0.65136	8.6042	-6.3018	1.23e-07	1.95e-06	7.3071
MT2A	-0.75265	12.217	-6.2977	1.25e-07	1.97e-06	7.2934
LINC00341	0.64624	9.4512	6.2974	1.25e-07	1.97e-06	7.2924
FBXO27	-0.35541	3.9868	-6.292	1.27e-07	2e-06	7.2744
ITCH	-0.29842	6.2125	-6.2923	1.27e-07	2e-06	7.2753
ATG13	0.26897	7.1624	6.2906	1.28e-07	2.01e-06	7.2697
NECAB2	-0.49004	5.7425	-6.2877	1.29e-07	2.03e-06	7.2603
DAO	-1.1523	6.4592	-6.2846	1.31e-07	2.04e-06	7.2499
ITGAX	0.58521	5.4169	6.2842	1.31e-07	2.04e-06	7.2484
CINP	0.46951	6.8792	6.2861	1.3e-07	2.04e-06	7.255
NR2F2	0.34549	9.109	6.2846	1.31e-07	2.04e-06	7.2499
CCDC137	0.68282	5.1881	6.2824	1.32e-07	2.05e-06	7.2426
AGT	-1.2205	6.3496	-6.2812	1.32e-07	2.06e-06	7.2386
NEDD4L	-0.27172	7.0095	-6.282	1.32e-07	2.06e-06	7.2412
PKP4	-0.52082	8.1422	-6.28	1.33e-07	2.06e-06	7.2345
CYP2B6	-0.69742	5.3504	-6.2785	1.33e-07	2.07e-06	7.2297
PRKD3	0.41648	7.2275	6.2755	1.35e-07	2.09e-06	7.2196
BEND7	-0.29753	5.2517	-6.272	1.36e-07	2.11e-06	7.208
KLC1	0.30848	8.1492	6.2696	1.37e-07	2.13e-06	7.1998
LOC284825	-1.0252	5.6929	-6.2655	1.39e-07	2.16e-06	7.1863
B3GNTL1	0.46456	4.7955	6.2632	1.4e-07	2.17e-06	7.1787
RNF128	-0.99119	6.5168	-6.26	1.42e-07	2.19e-06	7.1682
PSMB8	0.36031	8.8043	6.257	1.43e-07	2.21e-06	7.158
C1QA	1.1304	5.189	6.2546	1.45e-07	2.23e-06	7.15
LRRC32	0.81401	8.8911	6.2534	1.45e-07	2.24e-06	7.1462
CRLF1	0.4323	4.5934	6.2512	1.46e-07	2.25e-06	7.1388
C2CD2	0.5715	8.2228	6.2498	1.47e-07	2.26e-06	7.1342
DBNDD1	-0.23491	4.3052	-6.2494	1.47e-07	2.26e-06	7.1326
LGALS3BP	0.36482	9.6888	6.2469	1.48e-07	2.28e-06	7.1244
DDX19A	0.22778	6.4229	6.2448	1.49e-07	2.29e-06	7.1175
ZDHHC3	0.23279	6.445	6.2405	1.52e-07	2.32e-06	7.103
ELMOD1	-0.75132	3.5628	-6.2408	1.51e-07	2.32e-06	7.1043
VSIG4	1.3017	5.0868	6.2384	1.53e-07	2.33e-06	7.0961
LAPTM5	0.95627	8.0894	6.2383	1.53e-07	2.33e-06	7.0959
CHPF2	0.54019	7.6094	6.2375	1.53e-07	2.34e-06	7.0931
NIPAL2	0.36911	7.1548	6.2367	1.54e-07	2.34e-06	7.0905
ZSCAN2	0.35641	6.165	6.2342	1.55e-07	2.36e-06	7.0822
MTAP	-0.32353	4.5801	-6.2291	1.58e-07	2.4e-06	7.0653
HTR2B	1.7362	6.3171	6.2277	1.58e-07	2.41e-06	7.0605
ORMDL2	0.3966	7.9657	6.2231	1.61e-07	2.44e-06	7.0454
KNOP1	0.43006	6.202	6.2113	1.67e-07	2.54e-06	7.0061
BTC	-0.67809	4.9559	-6.2107	1.68e-07	2.54e-06	7.0039
KBTBD7	0.47243	7.0311	6.2109	1.68e-07	2.54e-06	7.0046
TMEM70	-0.38502	7.7638	-6.2072	1.7e-07	2.56e-06	6.9925
CTTNBP2	-0.686	7.5958	-6.2064	1.7e-07	2.57e-06	6.9897
ARAP3	0.42563	6.2802	6.2047	1.71e-07	2.58e-06	6.9842
MARVELD3	-0.45506	4.8736	-6.2023	1.73e-07	2.6e-06	6.976
SOX4	0.65711	7.0316	6.1996	1.74e-07	2.62e-06	6.9671
PRKAR2B	-0.6233	9.6134	-6.1981	1.75e-07	2.63e-06	6.9622
METTL7B	-1.0774	5.5519	-6.197	1.76e-07	2.64e-06	6.9586
HSPA9	-0.31978	8.4417	-6.1875	1.81e-07	2.72e-06	6.9269
C1orf198	0.47702	10.057	6.1868	1.82e-07	2.73e-06	6.9246
COLEC11	-0.71461	6.7026	-6.1825	1.84e-07	2.76e-06	6.9104
TAC1	1.6099	3.8136	6.1801	1.86e-07	2.78e-06	6.9022
EDARADD	-0.31168	3.3644	-6.1723	1.91e-07	2.85e-06	6.8763
HK1	0.45651	8.9905	6.1726	1.91e-07	2.85e-06	6.8774
SLC27A3	0.59121	6.8986	6.1705	1.92e-07	2.87e-06	6.8704
CFAP69	-0.38737	5.3766	-6.1675	1.94e-07	2.89e-06	6.8603
ACAA2	-0.30351	5.9615	-6.1667	1.95e-07	2.9e-06	6.8577
DAG1	0.3198	9.7743	6.1655	1.95e-07	2.91e-06	6.8536
LRPAP1	0.35722	7.5441	6.1647	1.96e-07	2.91e-06	6.851
RTTN	-0.4327	5.8972	-6.1634	1.97e-07	2.92e-06	6.8467
CCRL2	0.72541	5.9115	6.1638	1.97e-07	2.92e-06	6.848
LINC01537	0.62305	3.8626	6.1603	1.99e-07	2.95e-06	6.8364
PRKCH	0.44251	8.1774	6.1602	1.99e-07	2.95e-06	6.8361
SHKBP1	0.37265	6.1918	6.1559	2.02e-07	2.99e-06	6.8217
KCNJ16	-0.75858	8.2061	-6.1509	2.05e-07	3.03e-06	6.8051
ARHGAP24	-0.43006	7.8104	-6.1513	2.05e-07	3.03e-06	6.8067
DTNA	-0.23264	4.5021	-6.1495	2.06e-07	3.04e-06	6.8005
IFI16	0.32256	8.9413	6.1457	2.09e-07	3.08e-06	6.7881
MAP4	0.21872	8.7612	6.1442	2.1e-07	3.09e-06	6.7829
BCL10	-0.45884	8.9248	-6.1367	2.15e-07	3.17e-06	6.758
TESC	0.43334	5.1049	6.1265	2.23e-07	3.27e-06	6.7242
SLC6A19	-0.93326	6.8979	-6.1255	2.24e-07	3.28e-06	6.7208
AKR7A3	-0.96431	6.692	-6.1244	2.25e-07	3.29e-06	6.7171
LRRC10B	-0.36645	4.9071	-6.125	2.24e-07	3.29e-06	6.7191
C15orf39	0.36339	5.2754	6.1217	2.27e-07	3.32e-06	6.7082
PARP16	-0.38294	6.6881	-6.1196	2.28e-07	3.33e-06	6.7011
PTGFRN	0.63026	6.174	6.1204	2.28e-07	3.33e-06	6.7039
LOC100653233	-0.24789	5.0902	-6.1171	2.3e-07	3.35e-06	6.693
KCTD10	0.27055	10.002	6.1173	2.3e-07	3.35e-06	6.6936
PZP	0.45123	5.6411	6.1151	2.32e-07	3.37e-06	6.6862
SAMHD1	0.642	6.7973	6.1091	2.36e-07	3.44e-06	6.6664
CUBN	-1.4311	8.0051	-6.1025	2.42e-07	3.51e-06	6.6442
STX10	0.35595	6.7115	6.1026	2.42e-07	3.51e-06	6.6448
GPHN	-0.44703	7.4166	-6.1011	2.43e-07	3.52e-06	6.6398
CAP1	0.24849	10.697	6.1017	2.42e-07	3.52e-06	6.6418
LNX2	-0.66121	9.1381	-6.0993	2.44e-07	3.53e-06	6.6337
KIF26A	0.52255	5.2344	6.0981	2.45e-07	3.53e-06	6.6299
RIPK4	-0.50798	5.9487	-6.1002	2.44e-07	3.53e-06	6.6367
PLXDC1	0.42112	3.7718	6.0998	2.44e-07	3.53e-06	6.6355
RHOU	-0.63702	8.2085	-6.099	2.45e-07	3.53e-06	6.6327
SRSF1	0.2039	8.2056	6.1	2.44e-07	3.53e-06	6.6359
TGFBR2	0.42647	10.51	6.0989	2.45e-07	3.53e-06	6.6323
ARNTL2	0.254	3.9757	6.0976	2.46e-07	3.54e-06	6.628
CCDC3	0.84742	5.871	6.0928	2.5e-07	3.59e-06	6.612
PIK3CB	-0.35231	7.0372	-6.0919	2.51e-07	3.6e-06	6.6091
CBLB	-0.49128	8.4462	-6.089	2.53e-07	3.63e-06	6.5995
FAM65B	-0.44102	6.6756	-6.0891	2.53e-07	3.63e-06	6.5997
TXNIP	-0.50206	11.449	-6.086	2.56e-07	3.66e-06	6.5896
MPEG1	1.2505	6.9939	6.0857	2.56e-07	3.66e-06	6.5884
EFEMP2	0.37047	9.0446	6.086	2.56e-07	3.66e-06	6.5895
SPSB1	-0.85336	7.1571	-6.0853	2.56e-07	3.66e-06	6.5872
ACAT1	-0.53022	7.5438	-6.0818	2.59e-07	3.7e-06	6.5756
CIART	-0.87546	5.4744	-6.0796	2.61e-07	3.72e-06	6.5683
RASSF3	0.31244	7.0627	6.0798	2.61e-07	3.72e-06	6.5689
WDFY3-AS2	-0.68957	5.2378	-6.0783	2.62e-07	3.73e-06	6.5638
LOC100506098	-0.6186	5.0629	-6.0766	2.64e-07	3.75e-06	6.5585
DDRGK1	0.35348	8.6794	6.0762	2.64e-07	3.75e-06	6.5569
SLC28A1	-0.44817	4.8104	-6.0767	2.64e-07	3.75e-06	6.5588
GBP1	0.98805	8.6046	6.0747	2.66e-07	3.76e-06	6.5521
PAH	-1.5074	9.7482	-6.0742	2.66e-07	3.77e-06	6.5504
RNF157	-0.61034	4.7625	-6.0725	2.68e-07	3.78e-06	6.5448
SEMA4D	-0.5381	6.5896	-6.0701	2.7e-07	3.81e-06	6.5366
NUF2	0.47545	3.1626	6.0705	2.69e-07	3.81e-06	6.5379
ABHD17B	-0.34569	6.5506	-6.0661	2.73e-07	3.85e-06	6.5235
NSUN7	-0.74928	4.8734	-6.0668	2.73e-07	3.85e-06	6.5259
TOR4A	0.66147	5.3792	6.0653	2.74e-07	3.86e-06	6.5207
PPP1R3C	0.95979	8.8371	6.0619	2.77e-07	3.9e-06	6.5094
GRPEL1	-0.36451	8.0774	-6.0602	2.79e-07	3.92e-06	6.504
TCP1	-0.28175	8.2226	-6.0585	2.81e-07	3.94e-06	6.4983
GPR4	0.45129	6.8427	6.0574	2.82e-07	3.95e-06	6.4946
LINC01116	0.66389	5.0648	6.0567	2.82e-07	3.96e-06	6.4922
PEPD	-0.66519	9.3411	-6.0513	2.87e-07	4.02e-06	6.4742
EVA1B	0.47039	7.319	6.0518	2.87e-07	4.02e-06	6.4761
NAV1	0.42801	7.1449	6.0511	2.88e-07	4.02e-06	6.4738
TSPAN1	-0.9785	6.9888	-6.0496	2.89e-07	4.04e-06	6.4687
FMO5	-0.55808	5.6126	-6.0398	2.99e-07	4.17e-06	6.4362
WARS	0.58674	8.7909	6.0397	2.99e-07	4.17e-06	6.4357
ZDHHC16	0.37403	7.3517	6.0363	3.02e-07	4.21e-06	6.4244
LOXL4	0.74998	6.8893	6.0315	3.07e-07	4.27e-06	6.4086
HERC5	-0.56651	6.6745	-6.0299	3.09e-07	4.29e-06	6.4034
C15orf48	1.6204	4.1961	6.029	3.1e-07	4.3e-06	6.4001
HDAC9	0.35631	4.4704	6.0291	3.1e-07	4.3e-06	6.4006
ITGAL	0.79563	4.9091	6.0276	3.11e-07	4.32e-06	6.3958
RGS1	-1.0441	3.7525	-6.0269	3.12e-07	4.32e-06	6.3934
LOC101927482	0.52534	3.2695	6.0258	3.13e-07	4.33e-06	6.3898
TGFB1	0.24541	4.6193	6.0185	3.21e-07	4.44e-06	6.3654
KCNJ15	-1.0744	7.6088	-6.0155	3.24e-07	4.48e-06	6.3554
CMYA5	-0.53328	7.2844	-6.0144	3.26e-07	4.49e-06	6.3519
RND3	-0.71345	9.1319	-6.0132	3.27e-07	4.51e-06	6.348
ASPN	0.8444	5.182	6.0127	3.27e-07	4.51e-06	6.3463
EID3	-0.73134	6.1352	-6.0114	3.29e-07	4.52e-06	6.342
ZMIZ1	0.39565	10.093	6.0093	3.31e-07	4.55e-06	6.335
NOTCH1	0.47588	7.0399	6.0071	3.34e-07	4.58e-06	6.3275
NFATC3	-0.28352	7.7278	-6.0015	3.4e-07	4.67e-06	6.3089
DNAH7	-0.34858	4.3321	-6.0003	3.42e-07	4.68e-06	6.3049
ALDH9A1	-0.32024	11.101	-5.9983	3.44e-07	4.7e-06	6.2984
GPR84	0.5575	3.5771	5.9986	3.44e-07	4.7e-06	6.2994
LMF2	0.33721	7.1563	5.9985	3.44e-07	4.7e-06	6.2992
C8orf46	-0.2619	3.1349	-5.9977	3.45e-07	4.71e-06	6.2964
RHOG	0.47694	7.7277	5.9969	3.45e-07	4.71e-06	6.2937
DACH1	-0.39542	9.7456	-5.996	3.46e-07	4.72e-06	6.2909
ARFGEF3	0.24576	3.5308	5.9951	3.48e-07	4.73e-06	6.2879
QPRT	-0.59714	7.5752	-5.9903	3.53e-07	4.8e-06	6.272
WFS1	0.40296	8.5437	5.9901	3.53e-07	4.8e-06	6.2713
HDHD3	-0.73031	6.4664	-5.9903	3.53e-07	4.8e-06	6.2717
MICAL1	0.46603	6.0538	5.9842	3.61e-07	4.89e-06	6.2517
TTC32	-0.6969	7.558	-5.9829	3.62e-07	4.91e-06	6.2474
CAMKK2	0.26474	6.1396	5.9822	3.63e-07	4.92e-06	6.2449
RIDA	-0.98458	8.6275	-5.9794	3.66e-07	4.96e-06	6.2358
COMP	0.92777	3.7611	5.9769	3.7e-07	4.99e-06	6.2274
SH3RF1	-0.35914	7.7588	-5.9771	3.69e-07	4.99e-06	6.228
ADD1	0.27609	9.4344	5.9747	3.72e-07	5.01e-06	6.22
E2F7	0.24609	3.0406	5.9752	3.72e-07	5.01e-06	6.2217
FZD5	-0.53065	7.4449	-5.975	3.72e-07	5.01e-06	6.221
CD80	0.2898	3.3451	5.9753	3.72e-07	5.01e-06	6.2221
MGP	0.44516	11.704	5.9739	3.73e-07	5.02e-06	6.2174
BTN3A3	0.56597	7.3163	5.9705	3.78e-07	5.08e-06	6.2063
SYT4	-0.83354	4.8323	-5.9699	3.79e-07	5.08e-06	6.204
MAN1A1	-0.36124	8.129	-5.9674	3.82e-07	5.12e-06	6.1958
WASL	-0.204	8.592	-5.9653	3.84e-07	5.15e-06	6.189
OLR1	0.71654	3.5513	5.9639	3.86e-07	5.17e-06	6.1844
FMO1	-1.5066	8.6161	-5.9591	3.92e-07	5.25e-06	6.1685
INPP5K	0.38398	7.1339	5.9595	3.92e-07	5.25e-06	6.1697
SNTA1	-0.36048	6.2787	-5.957	3.95e-07	5.28e-06	6.1614
MMP12	0.60888	3.2932	5.9544	3.99e-07	5.32e-06	6.1526
PYGB	0.35368	7.3626	5.953	4.01e-07	5.34e-06	6.148
ASCC3	0.33724	6.7555	5.9502	4.04e-07	5.39e-06	6.139
ZNF436	0.35601	6.6751	5.9498	4.05e-07	5.39e-06	6.1376
RAB3IP	-0.42528	6.0399	-5.9463	4.1e-07	5.45e-06	6.126
CPE	0.73061	4.6165	5.9438	4.13e-07	5.49e-06	6.1176
MYRIP	-1.0291	6.3443	-5.9423	4.15e-07	5.51e-06	6.1126
EBAG9	-0.23593	9.2552	-5.9423	4.15e-07	5.51e-06	6.1126
TCF15	0.39628	5.1713	5.9386	4.21e-07	5.57e-06	6.1006
MRPL50	-0.45292	7.2448	-5.9369	4.23e-07	5.6e-06	6.0948
BATF2	0.54492	6.3978	5.933	4.29e-07	5.67e-06	6.0818
KDELR3	0.4528	7.2553	5.9311	4.31e-07	5.7e-06	6.0755
CRYZ	-0.50917	9.5159	-5.9289	4.35e-07	5.74e-06	6.0683
FUT3	-0.45888	4.2264	-5.9284	4.35e-07	5.74e-06	6.0667
TIMP2	0.21582	11.119	5.9277	4.36e-07	5.75e-06	6.0644
PSMD7	0.2427	9.0822	5.9265	4.38e-07	5.77e-06	6.0603
44259	0.42901	4.8076	5.9232	4.43e-07	5.83e-06	6.0494
TBCD	0.29291	6.3048	5.9216	4.45e-07	5.86e-06	6.044
FRS2	-0.37204	6.4023	-5.9207	4.47e-07	5.87e-06	6.0411
SH3BP2	0.26188	6.0181	5.9203	4.47e-07	5.87e-06	6.0399
STAT2	0.31164	6.4663	5.9206	4.47e-07	5.87e-06	6.0407
KLHL5	0.46157	6.5387	5.9174	4.52e-07	5.92e-06	6.03
GNAI1	0.47574	8.6645	5.9157	4.55e-07	5.95e-06	6.0244
HSDL1	0.37088	6.8608	5.9148	4.56e-07	5.96e-06	6.0216
HOXC6	0.54796	8.2306	5.9137	4.58e-07	5.98e-06	6.0178
CEP131	0.4291	6.3014	5.9112	4.61e-07	6.02e-06	6.0097
ARHGAP21	-0.59308	7.0259	-5.9073	4.68e-07	6.1e-06	5.9966
POSTN	1.1851	10.629	5.9037	4.73e-07	6.16e-06	5.9848
COL4A4	0.39461	9.2105	5.9038	4.73e-07	6.16e-06	5.9852
AKR1C1	-1.1625	6.76	-5.9025	4.75e-07	6.18e-06	5.9807
ACTA2	0.95788	9.6987	5.8999	4.79e-07	6.23e-06	5.9722
RTN2	0.41741	5.9747	5.9002	4.79e-07	6.23e-06	5.9732
TNFRSF1B	0.65168	6.7247	5.8997	4.8e-07	6.23e-06	5.9715
MPP7	-0.35582	3.9991	-5.8975	4.83e-07	6.27e-06	5.9642
HSPH1	-0.97952	7.4133	-5.8952	4.87e-07	6.31e-06	5.9568
ADIRF	0.67919	8.5392	5.8949	4.88e-07	6.31e-06	5.9555
TMEM200C	-0.42141	10.191	-5.891	4.94e-07	6.39e-06	5.9428
MAATS1	-0.29373	4.1689	-5.8901	4.95e-07	6.4e-06	5.9399
PPARGC1B	0.32315	5.7127	5.8884	4.98e-07	6.43e-06	5.934
WWP1	-0.3194	9.5014	-5.8877	4.99e-07	6.44e-06	5.9319
C18orf8	-0.30068	7.6541	-5.8873	5e-07	6.45e-06	5.9304
APP	0.25446	10.815	5.8803	5.12e-07	6.6e-06	5.9072
EXOC3L2	0.49477	7.7932	5.8785	5.15e-07	6.63e-06	5.9014
IL18BP	0.53854	6.8039	5.8765	5.19e-07	6.66e-06	5.8947
QTRT2	0.48837	7.9925	5.877	5.18e-07	6.66e-06	5.8963
PHLDA3	0.3812	6.6425	5.8759	5.2e-07	6.67e-06	5.8927
ENGASE	0.40981	7.0977	5.8762	5.19e-07	6.67e-06	5.8937
SIGMAR1	0.40598	6.4373	5.874	5.23e-07	6.7e-06	5.8865
PSMD4	0.25124	10.072	5.8742	5.23e-07	6.7e-06	5.8869
NRGN	0.51399	6.3552	5.8695	5.31e-07	6.8e-06	5.8713
RCBTB2	0.36304	9.258	5.8664	5.37e-07	6.84e-06	5.8612
GLB1	0.41467	8.689	5.8662	5.37e-07	6.84e-06	5.8605
HSP90AA1	-0.29834	11.894	-5.8663	5.37e-07	6.84e-06	5.8609
PDGFRA	0.63376	7.8599	5.8672	5.35e-07	6.84e-06	5.8639
PLOD1	0.33304	7.3226	5.8669	5.36e-07	6.84e-06	5.8628
LOC101927278	-0.4196	4.7857	-5.8651	5.39e-07	6.86e-06	5.8571
KCNN4	0.35425	4.4427	5.8633	5.42e-07	6.9e-06	5.8511
YRDC	-0.35874	6.9849	-5.8594	5.5e-07	6.98e-06	5.838
CARD8	0.42406	7.2928	5.8587	5.51e-07	6.99e-06	5.8356
GCLC	-0.46462	6.8877	-5.8567	5.55e-07	7.03e-06	5.8291
PLEKHH1	-0.46019	5.3078	-5.8543	5.59e-07	7.09e-06	5.8212
ERVMER34-1	-0.76399	6.6685	-5.85	5.67e-07	7.18e-06	5.8068
PTPRC	0.52506	5.5239	5.8503	5.67e-07	7.18e-06	5.8079
AK7	-0.37296	3.68	-5.8487	5.7e-07	7.19e-06	5.8025
PPP1R18	0.43608	7.0248	5.8491	5.69e-07	7.19e-06	5.804
C16orf91	0.33367	7.4288	5.8494	5.68e-07	7.19e-06	5.805
PROZ	-0.78826	5.7725	-5.8465	5.74e-07	7.24e-06	5.7952
RILPL2	0.37788	9.7731	5.8447	5.77e-07	7.28e-06	5.7894
PEAR1	0.57524	7.4297	5.8429	5.81e-07	7.32e-06	5.7833
RNASE1	0.61955	10.618	5.8416	5.83e-07	7.34e-06	5.7792
MS4A7	1.0699	5.4942	5.8403	5.86e-07	7.37e-06	5.7748
EXOSC6	0.45776	4.8186	5.8397	5.87e-07	7.38e-06	5.7728
FUT1	0.52665	7.2405	5.8384	5.9e-07	7.4e-06	5.7685
MOB3B	0.48851	6.3796	5.8354	5.96e-07	7.47e-06	5.7586
NAT8	-1.3889	8.9195	-5.833	6.01e-07	7.52e-06	5.7508
FAM46C	-0.55631	6.4756	-5.8321	6.03e-07	7.54e-06	5.7477
CCDC69	0.51963	5.7936	5.8312	6.04e-07	7.56e-06	5.7447
RSPH14	-0.62189	4.7639	-5.8308	6.05e-07	7.56e-06	5.7435
KIF14	0.24711	3.0538	5.8298	6.07e-07	7.58e-06	5.7402
MARS	0.29724	8.6244	5.8292	6.08e-07	7.59e-06	5.7381
SUGCT	-1.0024	6.1336	-5.8281	6.11e-07	7.61e-06	5.7344
NR0B2	-0.44085	5.1872	-5.8278	6.11e-07	7.61e-06	5.7335
GPR3	-0.48627	3.7092	-5.8216	6.24e-07	7.77e-06	5.7129
LOC644656	0.50148	4.7649	5.8205	6.27e-07	7.79e-06	5.7093
LRRC66	-0.43459	3.5864	-5.819	6.3e-07	7.81e-06	5.7044
PREX1	0.49019	7.1871	5.8189	6.3e-07	7.81e-06	5.7042
JOSD1	-0.57266	8.1962	-5.819	6.3e-07	7.81e-06	5.7045
CHSY1	-0.4066	10.034	-5.8182	6.31e-07	7.83e-06	5.7017
MOGS	0.42232	6.1032	5.817	6.34e-07	7.85e-06	5.6977
PSMG1	-0.43197	8.2297	-5.8163	6.36e-07	7.87e-06	5.6953
COL6A3	1.476	6.0745	5.8132	6.42e-07	7.94e-06	5.6853
ZNF398	0.39382	6.4335	5.8113	6.46e-07	7.99e-06	5.6789
CEP85L	-0.3492	6.3471	-5.8092	6.51e-07	8.04e-06	5.6718
C1orf216	0.4946	7.7355	5.8071	6.55e-07	8.09e-06	5.6651
C12orf75	-0.77098	6.4008	-5.803	6.65e-07	8.19e-06	5.6513
ATP1B1	-0.41622	11.536	-5.802	6.67e-07	8.2e-06	5.648
GPRC5B	0.39508	6.8818	5.8021	6.67e-07	8.2e-06	5.6484
TGM2	0.39968	6.2213	5.8019	6.67e-07	8.2e-06	5.6477
EBI3	0.45234	4.7725	5.8005	6.7e-07	8.24e-06	5.6431
POLI	-0.38955	7.4671	-5.8	6.71e-07	8.24e-06	5.6416
LAPTM4B	0.27046	10.384	5.797	6.78e-07	8.32e-06	5.6314
RAB17	-0.68897	6.4957	-5.7967	6.79e-07	8.32e-06	5.6305
LPCAT2	-0.4192	8.1565	-5.7928	6.88e-07	8.42e-06	5.6179
IKBKB	0.23582	5.9732	5.7884	6.98e-07	8.54e-06	5.603
GJB2	-0.94441	6.0835	-5.7871	7.01e-07	8.57e-06	5.5987
NBR1	0.26033	9.8535	5.7859	7.04e-07	8.6e-06	5.5948
SLC51B	-0.91243	5.4234	-5.7849	7.07e-07	8.62e-06	5.5915
NET1	0.60268	8.8034	5.7841	7.08e-07	8.64e-06	5.5889
SPATA5	-0.35566	4.7046	-5.7811	7.16e-07	8.72e-06	5.579
FLNA	0.58159	7.6358	5.7801	7.18e-07	8.74e-06	5.5756
YIPF3	0.35657	8.4621	5.7794	7.2e-07	8.76e-06	5.5735
RPL23AP32	0.77155	5.25	5.7775	7.24e-07	8.81e-06	5.5671
ZEB2	0.27206	6.5703	5.7758	7.28e-07	8.85e-06	5.5617
PPM1F	0.43364	8.1217	5.7746	7.31e-07	8.88e-06	5.5576
FMR1	-0.30323	9.1375	-5.7737	7.34e-07	8.89e-06	5.5545
KRCC1	-0.25318	8.8142	-5.7741	7.33e-07	8.89e-06	5.5559
SCAPER	-0.40576	7.1919	-5.7719	7.38e-07	8.94e-06	5.5486
FAM135A	-0.40844	7.5733	-5.7717	7.39e-07	8.94e-06	5.5479
HSPA1B	-1.3293	10.252	-5.7708	7.41e-07	8.95e-06	5.5451
LAMB2	0.32486	10.08	5.7707	7.41e-07	8.95e-06	5.5446
LOC101927244	-0.88976	4.5856	-5.7697	7.44e-07	8.97e-06	5.5414
ZFP36L1	-0.24009	5.8951	-5.7696	7.44e-07	8.97e-06	5.5411
C19orf25	0.27753	6.0031	5.7662	7.52e-07	9.07e-06	5.5298
SOX9	-1.0661	5.8424	-5.7657	7.54e-07	9.07e-06	5.5282
CXCR2	-1.4008	6.5908	-5.7652	7.55e-07	9.08e-06	5.5264
CCDC173	-0.98075	4.8563	-5.7605	7.67e-07	9.22e-06	5.5111
P2RY2	0.53997	3.9466	5.7564	7.78e-07	9.34e-06	5.4974
TAB2	-0.28073	7.7662	-5.7551	7.81e-07	9.37e-06	5.4932
BCL6B	0.37865	6.5858	5.7548	7.82e-07	9.38e-06	5.4921
ACCS	0.46668	6.841	5.7538	7.85e-07	9.4e-06	5.4888
SLC39A5	-0.67575	7.0147	-5.7515	7.9e-07	9.47e-06	5.4813
RBAK	-0.39143	5.6555	-5.7501	7.94e-07	9.51e-06	5.4764
SEPW1	0.32257	10.273	5.7453	8.07e-07	9.65e-06	5.4608
MEGF9	-0.31197	8.9851	-5.7423	8.16e-07	9.74e-06	5.4507
PLEKHO1	0.48442	7.4983	5.7407	8.2e-07	9.79e-06	5.4456
BHMT	-1.2504	9.8984	-5.7396	8.23e-07	9.81e-06	5.4421
CYP4A11	-0.9536	6.6301	-5.7392	8.24e-07	9.82e-06	5.4406
LOC100130938	0.39578	4.4027	5.7376	8.29e-07	9.87e-06	5.4352
LRTOMT	-0.40106	5.9741	-5.7353	8.35e-07	9.93e-06	5.4279
FGFR3	0.39049	7.8131	5.7342	8.38e-07	9.96e-06	5.424
RIPK2	-0.36026	6.3414	-5.7343	8.38e-07	9.96e-06	5.4244
ELK3	0.32779	6.9127	5.7333	8.41e-07	9.98e-06	5.421
RPS19	0.24449	11.624	5.7288	8.53e-07	1.01e-05	5.4063
PCK2	-0.79786	8.9372	-5.7242	8.67e-07	1.02e-05	5.3911
PAPPA2	0.57504	5.2254	5.726	8.61e-07	1.02e-05	5.3971
XRCC5	0.18362	9.5222	5.7245	8.66e-07	1.02e-05	5.3922
SECISBP2	-0.29849	8.1555	-5.7274	8.57e-07	1.02e-05	5.4018
TMSB10	0.33425	12.253	5.7255	8.63e-07	1.02e-05	5.3955
ZNF277	-0.2781	7.6944	-5.7228	8.71e-07	1.03e-05	5.3865
TMC8	0.36935	4.5082	5.7225	8.72e-07	1.03e-05	5.3855
ADGRL4	0.50589	9.2911	5.7228	8.71e-07	1.03e-05	5.3864
IYD	-1.0364	4.5765	-5.7194	8.81e-07	1.04e-05	5.3754
IDI2-AS1	-0.39739	4.2358	-5.7178	8.85e-07	1.04e-05	5.3701
GXYLT2	0.56947	5.1799	5.7199	8.79e-07	1.04e-05	5.3768
SGIP1	-0.65206	7.0107	-5.7193	8.81e-07	1.04e-05	5.3749
RAB11FIP3	-0.5085	6.3132	-5.7175	8.87e-07	1.04e-05	5.3688
KHNYN	0.35582	7.7272	5.7132	8.99e-07	1.05e-05	5.3547
LGALS2	-0.98872	7.4964	-5.7143	8.96e-07	1.05e-05	5.3586
TMEM214	0.33977	7.3233	5.7145	8.96e-07	1.05e-05	5.3589
C11orf63	-0.31469	5.8327	-5.7124	9.02e-07	1.05e-05	5.3521
REPS2	-0.55367	5.7512	-5.7149	8.94e-07	1.05e-05	5.3604
HEYL	0.3706	5.9395	5.71	9.09e-07	1.06e-05	5.3443
KIFC3	0.25785	5.8337	5.7109	9.06e-07	1.06e-05	5.3472
FRMD4A	0.43172	7.0252	5.7091	9.12e-07	1.06e-05	5.3413
TEX11	-0.65091	3.9467	-5.7092	9.12e-07	1.06e-05	5.3416
RAP2A	0.38741	9.7665	5.71	9.09e-07	1.06e-05	5.3441
EVA1A	-0.66152	4.569	-5.7118	9.04e-07	1.06e-05	5.3502
HSD11B1	0.60216	5.2068	5.7064	9.2e-07	1.07e-05	5.3323
LENG8	0.34231	7.0718	5.7013	9.36e-07	1.08e-05	5.3154
ZNF346	0.25414	5.9504	5.7033	9.3e-07	1.08e-05	5.322
TRMT1	0.33591	5.2852	5.7026	9.32e-07	1.08e-05	5.3198
RTKN	-0.65814	6.2486	-5.7014	9.36e-07	1.08e-05	5.3159
DNALI1	-0.4369	7.1668	-5.7014	9.36e-07	1.08e-05	5.3157
PHYHIPL	-0.62924	6.5778	-5.7025	9.32e-07	1.08e-05	5.3194
ZNF70	0.53181	5.7368	5.6987	9.44e-07	1.09e-05	5.3069
PRR14	0.29483	7.7892	5.6988	9.44e-07	1.09e-05	5.3073
BICDL1	-0.22702	5.6501	-5.6978	9.47e-07	1.09e-05	5.3038
DKK2	0.46602	3.2621	5.6955	9.55e-07	1.1e-05	5.2962
KLF5	-0.77912	4.8168	-5.6959	9.53e-07	1.1e-05	5.2978
AMPD3	0.29	5.6662	5.6939	9.6e-07	1.11e-05	5.2912
CTTNBP2NL	0.29969	6.9274	5.6909	9.69e-07	1.11e-05	5.2812
WDR35	-0.38977	6.0074	-5.6912	9.68e-07	1.11e-05	5.2822
TPD52	-0.31923	8.4558	-5.6928	9.63e-07	1.11e-05	5.2876
DENND4B	0.38164	7.2053	5.6931	9.62e-07	1.11e-05	5.2883
EGR3	-2.1128	7.306	-5.6855	9.87e-07	1.13e-05	5.2635
LINC01128	0.24081	5.0885	5.6862	9.85e-07	1.13e-05	5.2658
NIPSNAP1	-0.30588	7.3813	-5.6851	9.89e-07	1.13e-05	5.262
SLC25A44	-0.2914	8.6346	-5.6875	9.81e-07	1.13e-05	5.2699
MYL6	0.17898	12.666	5.6832	9.95e-07	1.14e-05	5.2557
LOC153684	0.37413	3.8178	5.6798	1.01e-06	1.15e-05	5.2446
HBEGF	-1.1896	8.4308	-5.675	1.02e-06	1.17e-05	5.2288
ELK1	-0.32715	4.5887	-5.674	1.03e-06	1.17e-05	5.2254
EZH2	0.62537	3.8773	5.673	1.03e-06	1.18e-05	5.2221
UNC45A	0.32778	6.5189	5.6654	1.06e-06	1.2e-05	5.1972
WDR1	0.24621	8.9291	5.6678	1.05e-06	1.2e-05	5.2052
LOC100505710	-0.2751	4.4622	-5.6634	1.06e-06	1.21e-05	5.1904
GRAP	0.29347	5.0626	5.6597	1.08e-06	1.22e-05	5.1783
FBXO17	-0.37556	8.317	-5.6611	1.07e-06	1.22e-05	5.1831
FANCA	0.21129	4.6256	5.6595	1.08e-06	1.22e-05	5.1778
PRDM1	-0.75033	6.3542	-5.6609	1.07e-06	1.22e-05	5.1822
PSMB6	0.25183	9.7218	5.657	1.09e-06	1.23e-05	5.1694
EGOT	-0.74402	4.446	-5.6536	1.1e-06	1.24e-05	5.1581
APOH	-1.251	5.7158	-5.6551	1.09e-06	1.24e-05	5.1632
RHOJ	0.34747	6.2012	5.654	1.1e-06	1.24e-05	5.1596
REEP6	-0.81036	5.5021	-5.6552	1.09e-06	1.24e-05	5.1634
SNX17	0.26793	9.5246	5.6543	1.1e-06	1.24e-05	5.1607
IGDCC4	0.47832	3.7066	5.6486	1.12e-06	1.26e-05	5.1416
C17orf96	-0.54557	5.3337	-5.6459	1.13e-06	1.27e-05	5.1328
SENP7	-0.38975	5.4129	-5.6463	1.13e-06	1.27e-05	5.134
SLC5A10	-0.86834	6.7917	-5.6426	1.14e-06	1.29e-05	5.122
NOD2	0.50776	4.3656	5.6418	1.14e-06	1.29e-05	5.1195
SNRNP200	0.30048	10.221	5.6388	1.16e-06	1.3e-05	5.1096
MAVS	0.20629	6.3813	5.638	1.16e-06	1.3e-05	5.1069
NOL12	0.29665	5.9169	5.6396	1.15e-06	1.3e-05	5.112
TIMELESS	0.29616	4.6492	5.6384	1.16e-06	1.3e-05	5.1082
KCNK6	0.85131	5.9116	5.6348	1.17e-06	1.31e-05	5.0961
IGF2BP2	-0.41502	4.0722	-5.6294	1.19e-06	1.34e-05	5.0785
SYT9	-0.44856	6.1893	-5.6285	1.2e-06	1.34e-05	5.0756
GSTO1	0.30266	10.004	5.6272	1.2e-06	1.34e-05	5.0711
TMEM35B	0.31502	8.6452	5.6242	1.21e-06	1.36e-05	5.0615
PDZD8	-0.40936	6.4452	-5.6245	1.21e-06	1.36e-05	5.0623
SIRT1	-0.41439	8.4822	-5.6239	1.21e-06	1.36e-05	5.0604
ZC3H15	-0.26582	9.0021	-5.6237	1.22e-06	1.36e-05	5.0599
RBBP6	-0.30356	7.4802	-5.6236	1.22e-06	1.36e-05	5.0594
ZNF124	-0.88553	7.5443	-5.623	1.22e-06	1.36e-05	5.0573
HAO2	-1.3391	6.7846	-5.6157	1.25e-06	1.39e-05	5.0333
ACYP1	0.40134	7.6073	5.6159	1.25e-06	1.39e-05	5.0341
SPATA2	-0.28805	6.4729	-5.6169	1.24e-06	1.39e-05	5.0373
FAP	0.69198	4.0908	5.6067	1.29e-06	1.43e-05	5.0038
GZMK	0.60261	3.9445	5.6068	1.29e-06	1.43e-05	5.0041
MYL7	-0.29218	5.3457	-5.6059	1.29e-06	1.43e-05	5.0012
SLC37A4	-0.45918	7.3771	-5.604	1.3e-06	1.44e-05	4.9947
APLNR	1.1733	9.4612	5.6001	1.32e-06	1.45e-05	4.982
DLGAP4	0.33448	6.8455	5.6025	1.31e-06	1.45e-05	4.9898
LSM7	0.53383	7.4056	5.601	1.31e-06	1.45e-05	4.9851
TRNAU1AP	0.31386	6.5317	5.6021	1.31e-06	1.45e-05	4.9885
PRKCB	0.32183	4.6975	5.6007	1.31e-06	1.45e-05	4.984
SLC16A3	0.3484	5.4504	5.5983	1.32e-06	1.46e-05	4.9762
COL6A1	0.23825	5.5662	5.5948	1.34e-06	1.48e-05	4.9646
KIF18B	0.48084	4.0922	5.5931	1.35e-06	1.48e-05	4.9589
DCPS	0.43977	6.2884	5.595	1.34e-06	1.48e-05	4.9652
KDM6B	-0.49286	6.3294	-5.5907	1.36e-06	1.49e-05	4.9512
NVL	0.47037	6.6268	5.5909	1.36e-06	1.49e-05	4.9519
CYP27C1	0.42701	3.2119	5.5896	1.36e-06	1.5e-05	4.9475
CCNL1	-0.58372	7.7149	-5.588	1.37e-06	1.51e-05	4.9423
CALU	0.26665	8.062	5.5868	1.38e-06	1.51e-05	4.9382
TTC39B	-0.40399	5.583	-5.5848	1.39e-06	1.52e-05	4.9316
PCCA	-0.49659	7.6735	-5.5845	1.39e-06	1.52e-05	4.9306
PML	0.22221	5.5215	5.5849	1.38e-06	1.52e-05	4.9321
PBK	0.73737	3.5995	5.5853	1.38e-06	1.52e-05	4.9334
SNX3	0.25946	11.232	5.5848	1.38e-06	1.52e-05	4.9318
ELF3	-0.70033	5.8758	-5.5825	1.4e-06	1.53e-05	4.9242
TPX2	0.66167	3.7142	5.5801	1.41e-06	1.53e-05	4.9164
PCLO	-0.39525	4.2544	-5.5811	1.4e-06	1.53e-05	4.9196
NHEJ1	0.33498	6.0278	5.5815	1.4e-06	1.53e-05	4.9207
DYSF	0.51513	9.4493	5.5823	1.4e-06	1.53e-05	4.9236
BMF	0.39419	5.5098	5.58	1.41e-06	1.53e-05	4.9158
FAM134B	-0.22749	10.473	-5.5763	1.43e-06	1.55e-05	4.9038
ARIH2OS	0.51576	3.8539	5.5764	1.42e-06	1.55e-05	4.9042
P2RX7	0.28119	4.0354	5.5745	1.43e-06	1.56e-05	4.8978
SIPA1	0.43636	6.0539	5.5731	1.44e-06	1.56e-05	4.8931
MT1M	-1.5504	7.5214	-5.5724	1.44e-06	1.57e-05	4.8911
IL21R	0.31078	4.7527	5.5717	1.45e-06	1.57e-05	4.8887
RAB24	0.38251	6.9136	5.5725	1.44e-06	1.57e-05	4.8912
ZNF30	0.48102	6.7399	5.5664	1.47e-06	1.6e-05	4.871
IL3RA	0.42257	5.5721	5.5629	1.49e-06	1.61e-05	4.8596
PTPN1	-0.60325	7.8422	-5.562	1.5e-06	1.61e-05	4.8568
BNIP3L	-0.21128	10.485	-5.5638	1.49e-06	1.61e-05	4.8627
ABHD16A	0.41468	8.2898	5.5618	1.5e-06	1.61e-05	4.8562
PMPCB	-0.22073	7.5534	-5.5632	1.49e-06	1.61e-05	4.8607
SEC61A1	0.2481	8.0182	5.5601	1.5e-06	1.62e-05	4.8505
ZG16B	0.40232	4.9952	5.5575	1.52e-06	1.63e-05	4.8419
ARHGEF37	-0.34551	8.5211	-5.5585	1.51e-06	1.63e-05	4.8452
NFE2L3	0.65965	7.5371	5.5566	1.52e-06	1.64e-05	4.8391
CLIC1	0.32095	10.679	5.554	1.54e-06	1.65e-05	4.8305
INPP5A	0.36107	8.2609	5.5532	1.54e-06	1.65e-05	4.8277
LOC101927877	-0.20015	3.768	-5.5518	1.55e-06	1.66e-05	4.8233
BEX4	-0.37082	9.707	-5.5521	1.55e-06	1.66e-05	4.8243
PDHB	0.17883	9.7844	5.5501	1.56e-06	1.67e-05	4.8175
NRG3	0.67904	6.8927	5.5459	1.58e-06	1.69e-05	4.8039
SETD7	0.35432	8.5446	5.5453	1.58e-06	1.69e-05	4.8019
CDH5	0.54283	8.6338	5.5434	1.59e-06	1.7e-05	4.7957
DEPTOR	-0.67569	8.0163	-5.5426	1.6e-06	1.71e-05	4.7929
SLC30A2	-0.40862	5.7616	-5.5424	1.6e-06	1.71e-05	4.7923
PLCG1	0.27919	6.9783	5.5393	1.61e-06	1.72e-05	4.7821
MICALL2	0.68777	6.3654	5.5387	1.62e-06	1.72e-05	4.7801
GYG2	-0.54093	5.832	-5.5385	1.62e-06	1.72e-05	4.7796
RNPEP	0.29778	7.2569	5.5379	1.62e-06	1.73e-05	4.7776
HVCN1	0.54116	7.3253	5.5369	1.63e-06	1.73e-05	4.7743
GPX8	0.35106	8.6448	5.5357	1.63e-06	1.74e-05	4.7702
EBP	-0.40594	7.3517	-5.5327	1.65e-06	1.75e-05	4.7604
MFAP2	0.57987	5.5011	5.5316	1.66e-06	1.76e-05	4.7567
CDHR5	-0.4882	5.1358	-5.5322	1.65e-06	1.76e-05	4.7589
CD248	0.54677	7.1846	5.5303	1.66e-06	1.76e-05	4.7524
PDIA4	0.31382	8.7061	5.5277	1.68e-06	1.78e-05	4.7441
CRTAP	0.24581	7.8604	5.525	1.69e-06	1.79e-05	4.7352
PPID	0.30089	8.1997	5.5259	1.69e-06	1.79e-05	4.7382
SLC25A18	-1.3512	5.6892	-5.5261	1.69e-06	1.79e-05	4.7389
STK38L	0.3204	7.8101	5.5238	1.7e-06	1.8e-05	4.7311
JMJD6	-0.54073	5.8678	-5.5215	1.71e-06	1.81e-05	4.7237
ABCC6	-0.64754	5.0681	-5.522	1.71e-06	1.81e-05	4.7254
HAUS7	0.36999	5.3841	5.5182	1.73e-06	1.83e-05	4.7129
CX3CR1	1.3594	7.3801	5.5164	1.74e-06	1.84e-05	4.7069
SCGB3A2	-0.21638	3.6676	-5.5148	1.75e-06	1.85e-05	4.7017
CCDC186	-0.33703	7.119	-5.5139	1.76e-06	1.85e-05	4.6987
KLF2	-0.801	10.038	-5.5115	1.77e-06	1.86e-05	4.6908
PLN	0.7556	5.0485	5.5106	1.78e-06	1.87e-05	4.688
SUCLG1	-0.46292	10.977	-5.511	1.77e-06	1.87e-05	4.6891
ACVR1C	-0.26279	3.1179	-5.5077	1.79e-06	1.88e-05	4.6784
ZNF341	0.24014	4.6359	5.5071	1.8e-06	1.89e-05	4.6763
SLIT2	-0.74199	6.4752	-5.5059	1.8e-06	1.89e-05	4.6724
ABHD12B	0.50426	5.045	5.5045	1.81e-06	1.9e-05	4.6678
ZNF837	0.24661	4.9923	5.5026	1.82e-06	1.91e-05	4.6617
C4orf19	-0.42854	4.1145	-5.5026	1.82e-06	1.91e-05	4.6617
MAP7D1	0.59432	7.5216	5.5021	1.83e-06	1.91e-05	4.66
CTC1	0.30104	5.2904	5.5032	1.82e-06	1.91e-05	4.6637
ENTPD3	0.24658	3.209	5.5028	1.82e-06	1.91e-05	4.6622
CCT8	0.20089	11.154	5.4977	1.86e-06	1.93e-05	4.6454
KANK3	0.43956	8.1872	5.4989	1.85e-06	1.93e-05	4.6495
HLA-DQB1	0.98886	7.9695	5.4956	1.87e-06	1.95e-05	4.6385
MAN2B1	0.63143	7.3741	5.4943	1.88e-06	1.95e-05	4.6342
EDA	-0.23315	3.5664	-5.4924	1.89e-06	1.96e-05	4.6282
AHCY	-0.43807	7.9878	-5.4917	1.89e-06	1.96e-05	4.6259
TOX3	-1.0613	4.8411	-5.4934	1.88e-06	1.96e-05	4.6313
MAP2K1	0.2871	9.7311	5.4935	1.88e-06	1.96e-05	4.6317
TP53I11	0.2963	4.8784	5.4923	1.89e-06	1.96e-05	4.6277
LOC101928054	0.74045	5.2397	5.4894	1.91e-06	1.97e-05	4.6184
CHIT1	0.32299	4.068	5.4895	1.91e-06	1.97e-05	4.6186
MAGI3	-0.41292	5.6265	-5.4906	1.9e-06	1.97e-05	4.6224
KCNJ3	-0.51842	3.9415	-5.486	1.93e-06	1.99e-05	4.6071
SMAD7	0.76432	7.0169	5.4863	1.93e-06	1.99e-05	4.6081
CD36	1.0518	4.6593	5.4868	1.92e-06	1.99e-05	4.6098
OGN	0.40214	3.0055	5.4832	1.95e-06	2.01e-05	4.598
APPBP2	-0.28126	9.1639	-5.482	1.95e-06	2.02e-05	4.5942
GLDC	-0.75545	7.1022	-5.4804	1.97e-06	2.03e-05	4.5889
RRP7A	0.40032	6.1765	5.4805	1.96e-06	2.03e-05	4.5892
PAQR4	0.43697	5.4586	5.4775	1.99e-06	2.04e-05	4.5792
WDR43	-0.36088	7.175	-5.4775	1.99e-06	2.04e-05	4.5792
TMC6	0.27207	5.216	5.4739	2.01e-06	2.06e-05	4.5676
PCBD1	-0.31902	7.565	-5.4739	2.01e-06	2.06e-05	4.5676
PDE7A	-0.41851	4.67	-5.4738	2.01e-06	2.06e-05	4.567
TNFSF8	0.25006	3.6612	5.47	2.04e-06	2.09e-05	4.5548
TBC1D8B	-0.43515	5.7551	-5.4654	2.07e-06	2.12e-05	4.5397
PEX5	-0.25304	6.307	-5.4651	2.07e-06	2.12e-05	4.5386
F2RL1	-0.4484	4.8207	-5.4633	2.08e-06	2.13e-05	4.5328
TMEM160	0.42124	5.8261	5.4629	2.08e-06	2.13e-05	4.5314
VAT1	0.35913	8.081	5.4608	2.1e-06	2.14e-05	4.5246
MUC20	-0.55337	5.0014	-5.462	2.09e-06	2.14e-05	4.5285
KIF11	0.42883	3.8526	5.4621	2.09e-06	2.14e-05	4.5289
ZDHHC7	0.27426	8.3183	5.4612	2.1e-06	2.14e-05	4.5258
C5orf49	-0.46823	3.7094	-5.4592	2.11e-06	2.15e-05	4.5194
SELM	0.44952	7.196	5.4592	2.11e-06	2.15e-05	4.5194
FAM46A	-0.58421	7.1221	-5.4597	2.11e-06	2.15e-05	4.5211
SKP2	0.24812	4.3905	5.4558	2.13e-06	2.17e-05	4.5083
SUSD2	-0.61808	5.9707	-5.4539	2.15e-06	2.18e-05	4.5019
PSMC5	0.22155	10.237	5.4543	2.15e-06	2.18e-05	4.5033
LOC100130744	0.33853	4.0643	5.4527	2.16e-06	2.19e-05	4.4979
CLCN5	-0.62581	5.8372	-5.4516	2.16e-06	2.2e-05	4.4945
C2CD4A	-1.1285	3.65	-5.4508	2.17e-06	2.2e-05	4.4917
SERPINA1	-1.2231	7.7175	-5.4499	2.18e-06	2.21e-05	4.4889
C1QTNF1-AS1	-0.52785	4.5048	-5.4473	2.2e-06	2.22e-05	4.4805
TNIP1	0.35578	8.8955	5.4485	2.19e-06	2.22e-05	4.4844
C1QB	1.341	5.1534	5.4473	2.2e-06	2.22e-05	4.4804
OSGIN2	-0.45364	5.4926	-5.4479	2.19e-06	2.22e-05	4.4822
AREG	-1.8649	5.9044	-5.4449	2.21e-06	2.24e-05	4.4724
C4orf32	0.44699	8.587	5.4437	2.22e-06	2.25e-05	4.4684
NALCN	0.51843	6.1008	5.4399	2.25e-06	2.27e-05	4.4561
NUDT16L1	0.24321	7.4235	5.4399	2.25e-06	2.27e-05	4.4562
PCAT19	0.51173	7.0958	5.4374	2.27e-06	2.28e-05	4.4479
TRA2B	-0.27274	7.1383	-5.4378	2.27e-06	2.28e-05	4.4493
MFSD1	0.27826	10.101	5.4378	2.27e-06	2.28e-05	4.4493
RGS5	0.65276	5.9968	5.439	2.26e-06	2.28e-05	4.4531
NREP	0.68442	3.9481	5.4386	2.26e-06	2.28e-05	4.4517
ZNF503-AS1	0.66461	7.1875	5.4365	2.28e-06	2.29e-05	4.4451
NOSIP	0.31499	8.543	5.4354	2.29e-06	2.29e-05	4.4415
KCNK2	-0.34688	3.5563	-5.4343	2.29e-06	2.3e-05	4.4379
PFN1	0.48629	7.9049	5.4345	2.29e-06	2.3e-05	4.4384
PACRG	-0.51107	5.9536	-5.4318	2.31e-06	2.32e-05	4.4295
DNPEP	0.31043	8.1882	5.4318	2.31e-06	2.32e-05	4.4297
DFFB	0.40082	4.9468	5.4292	2.33e-06	2.34e-05	4.4209
AK6	-0.34783	9.5977	-5.4271	2.35e-06	2.35e-05	4.414
ZBED5	0.33058	8.652	5.4276	2.35e-06	2.35e-05	4.4159
TIMMDC1	0.22292	9.9738	5.4256	2.36e-06	2.36e-05	4.4094
KCNK1	-0.50398	4.9374	-5.4233	2.38e-06	2.37e-05	4.4017
SDC4	-0.41617	10.39	-5.4236	2.38e-06	2.37e-05	4.4026
EPHA2	-0.60216	6.7973	-5.4214	2.4e-06	2.39e-05	4.3955
ZNF347	0.34267	5.2138	5.4208	2.4e-06	2.39e-05	4.3935
ERI2	-0.20545	5.1064	-5.4198	2.41e-06	2.4e-05	4.3902
GABARAPL1	-0.23925	8.3067	-5.4189	2.42e-06	2.4e-05	4.3873
HKDC1	-0.34599	4.6462	-5.4189	2.42e-06	2.4e-05	4.3872
TRIM63	-0.626	4.8643	-5.4183	2.42e-06	2.4e-05	4.3853
ACTR1A	0.31005	7.8231	5.4168	2.43e-06	2.41e-05	4.3806
ADAR	0.29525	10.382	5.4154	2.44e-06	2.42e-05	4.3759
CLEC14A	0.58175	7.4191	5.4145	2.45e-06	2.43e-05	4.3731
DNMT3A	0.30075	6.0453	5.4137	2.46e-06	2.43e-05	4.3704
KCND1	0.35511	4.6772	5.4147	2.45e-06	2.43e-05	4.3737
DNAL4	-0.30926	6.5431	-5.4128	2.46e-06	2.44e-05	4.3674
FGB	-1.3534	4.5159	-5.412	2.47e-06	2.44e-05	4.3647
LGALS3	0.58885	9.2459	5.4108	2.48e-06	2.45e-05	4.3607
SSPN	0.50396	7.0022	5.4111	2.48e-06	2.45e-05	4.3619
HSDL2	-0.41549	8.2062	-5.4108	2.48e-06	2.45e-05	4.3608
TMEM141	0.2835	7.7181	5.4114	2.48e-06	2.45e-05	4.3627
MICALL1	0.66679	7.3253	5.4085	2.5e-06	2.46e-05	4.3533
ST8SIA1	0.46776	3.2071	5.4033	2.54e-06	2.51e-05	4.3364
CDC123	0.24172	9.4623	5.4022	2.55e-06	2.51e-05	4.3328
LOC100507537	-0.5234	3.1319	-5.4004	2.57e-06	2.52e-05	4.3268
FRMD6	0.59831	7.0158	5.4009	2.57e-06	2.52e-05	4.3284
RGS10	-0.38921	8.9462	-5.4007	2.57e-06	2.52e-05	4.3278
MRPS18A	0.31825	8.2191	5.3999	2.57e-06	2.53e-05	4.3253
ZNF776	-0.44487	7.3175	-5.3986	2.58e-06	2.54e-05	4.3209
LDHB	-0.37121	12.066	-5.398	2.59e-06	2.54e-05	4.319
ARHGDIB	0.51591	9.731	5.3983	2.59e-06	2.54e-05	4.32
VMP1	-0.39119	9.3022	-5.3964	2.6e-06	2.55e-05	4.3139
RNF41	-0.27163	6.5813	-5.3956	2.61e-06	2.56e-05	4.311
ZYG11A	-0.77595	5.3615	-5.3947	2.62e-06	2.56e-05	4.3082
SERPINE1	-1.3744	7.4905	-5.3951	2.62e-06	2.56e-05	4.3095
LACTB2	-0.56632	7.0117	-5.3915	2.65e-06	2.59e-05	4.2977
TWF2	0.32503	6.7615	5.3902	2.66e-06	2.6e-05	4.2933
WDR86	0.22147	3.7108	5.3896	2.66e-06	2.6e-05	4.2916
CLDN2	-1.1272	7.1742	-5.3884	2.67e-06	2.61e-05	4.2875
SPAG5	-0.64749	6.1108	-5.3845	2.71e-06	2.64e-05	4.275
SH2B3	0.55472	8.7009	5.3831	2.72e-06	2.65e-05	4.2701
GPSM2	0.28936	4.9109	5.3833	2.72e-06	2.65e-05	4.2709
SIDT1	0.3349	3.5011	5.3828	2.73e-06	2.65e-05	4.2692
NUP93	0.3849	7.9248	5.3827	2.73e-06	2.65e-05	4.2688
PSMC3	0.26719	8.1475	5.3811	2.74e-06	2.66e-05	4.2636
AOAH	0.49884	5.3857	5.3799	2.75e-06	2.67e-05	4.2598
TBC1D24	0.30423	6.2412	5.377	2.78e-06	2.69e-05	4.2503
TIE1	0.71766	6.7385	5.3774	2.77e-06	2.69e-05	4.2516
GJD3	0.31971	5.5375	5.3754	2.79e-06	2.7e-05	4.245
PSEN2	0.34642	6.5873	5.3763	2.78e-06	2.7e-05	4.2481
TEX261	0.29237	7.835	5.3745	2.8e-06	2.71e-05	4.242
ERBIN	-0.23485	9.6185	-5.374	2.81e-06	2.71e-05	4.2405
ZBTB7C	-0.2817	6.3984	-5.3723	2.82e-06	2.73e-05	4.2349
MMP28	-0.29828	6.3029	-5.3703	2.84e-06	2.74e-05	4.2285
EGLN1	-0.18576	7.0366	-5.3694	2.85e-06	2.75e-05	4.2254
RNASE4	-0.40026	7.8222	-5.3699	2.85e-06	2.75e-05	4.2271
HSPA1L	-0.64297	6.3712	-5.3679	2.86e-06	2.76e-05	4.2206
CHGB	-0.82524	4.8792	-5.3653	2.89e-06	2.78e-05	4.2123
ITGB2-AS1	0.32022	4.8119	5.3647	2.9e-06	2.79e-05	4.21
WTIP	0.3417	7.3216	5.364	2.9e-06	2.79e-05	4.2078
AK5	0.52311	6.3368	5.3633	2.91e-06	2.79e-05	4.2057
IL10RB	0.34081	7.8035	5.3646	2.9e-06	2.79e-05	4.2099
ZNF302	0.56801	6.0453	5.3606	2.93e-06	2.82e-05	4.1969
RDX	-0.26191	7.4194	-5.3597	2.94e-06	2.82e-05	4.1937
IER3	-0.90497	11.003	-5.3608	2.93e-06	2.82e-05	4.1975
ECI2	-0.47974	9.1	-5.3592	2.95e-06	2.83e-05	4.1922
HLA-DRB1	0.45129	10.995	5.3582	2.96e-06	2.83e-05	4.189
P4HA3	0.22846	3.9783	5.3566	2.97e-06	2.84e-05	4.1837
SFRP4	0.63897	3.4708	5.3578	2.96e-06	2.84e-05	4.1876
FCER1G	0.95048	6.6863	5.3562	2.98e-06	2.85e-05	4.1824
LOC100128288	0.64302	3.7829	5.3535	3.01e-06	2.86e-05	4.1735
NXF1	0.50329	7.8423	5.3538	3e-06	2.86e-05	4.1747
CST6	0.55119	4.8202	5.3547	2.99e-06	2.86e-05	4.1773
DGCR8	0.40356	5.9677	5.3546	2.99e-06	2.86e-05	4.1773
ELL	-0.2611	4.7667	-5.3538	3e-06	2.86e-05	4.1745
ANGPTL6	0.38788	5.4087	5.3546	2.99e-06	2.86e-05	4.1771
RBFOX2	0.28549	9.0776	5.3527	3.01e-06	2.87e-05	4.1708
STRIP1	0.29368	7.3989	5.3516	3.02e-06	2.88e-05	4.1673
KIAA1958	-0.70473	4.8524	-5.3454	3.09e-06	2.93e-05	4.1471
DZIP1	0.43485	6.4292	5.3443	3.1e-06	2.94e-05	4.1434
MSN	0.27643	8.3964	5.345	3.09e-06	2.94e-05	4.1457
TLR1	0.93061	4.2121	5.3438	3.1e-06	2.94e-05	4.1419
ASPHD2	0.32778	4.6003	5.3433	3.11e-06	2.95e-05	4.1402
LAMTOR5	-0.27005	10.494	-5.342	3.12e-06	2.96e-05	4.1359
PLEKHA7	-0.4593	5.4463	-5.3416	3.13e-06	2.96e-05	4.1346
TRIM2	0.2798	7.1636	5.3417	3.13e-06	2.96e-05	4.135
EPCAM	-0.94646	8.9224	-5.3391	3.15e-06	2.98e-05	4.1266
QARS	0.36652	8.9165	5.3392	3.15e-06	2.98e-05	4.1268
SLC22A2	-0.82771	7.1112	-5.3385	3.16e-06	2.98e-05	4.1245
THBS2	1.0779	5.9715	5.3395	3.15e-06	2.98e-05	4.1279
PIH1D2	-0.31883	3.8326	-5.3373	3.17e-06	2.99e-05	4.1206
CPEB3	-0.30553	5.2086	-5.337	3.18e-06	2.99e-05	4.1198
TMBIM1	0.39737	9.9813	5.3372	3.17e-06	2.99e-05	4.1203
PNPLA3	-0.69429	5.2717	-5.3367	3.18e-06	2.99e-05	4.1188
PIK3R3	0.52414	7.2887	5.3376	3.17e-06	2.99e-05	4.1217
TRMT10A	-0.32334	4.9107	-5.336	3.19e-06	3e-05	4.1164
RNGTT	0.30243	5.437	5.3347	3.2e-06	3.01e-05	4.1121
PIP5K1C	0.33908	7.5334	5.3334	3.21e-06	3.02e-05	4.1081
PDE5A	0.31365	4.4286	5.333	3.22e-06	3.02e-05	4.1065
ERO1A	0.30601	7.3242	5.3284	3.27e-06	3.07e-05	4.0915
SP2-AS1	0.60785	3.4752	5.3259	3.3e-06	3.09e-05	4.0834
TNFRSF9	0.26456	3.6254	5.3261	3.29e-06	3.09e-05	4.0842
TMEM55A	0.42373	7.7303	5.3257	3.3e-06	3.09e-05	4.0829
CDKL1	-0.30757	5.2189	-5.3259	3.3e-06	3.09e-05	4.0835
RAC2	0.67957	7.0868	5.3228	3.33e-06	3.11e-05	4.0735
ARHGEF6	0.42748	8.7573	5.3221	3.34e-06	3.12e-05	4.071
TMEM106A	-0.44724	5.2092	-5.3206	3.35e-06	3.13e-05	4.0661
CD99	0.49117	9.2408	5.3211	3.35e-06	3.13e-05	4.0677
RRP8	0.5423	6.4836	5.32	3.36e-06	3.14e-05	4.0641
BPI	-0.35847	3.6176	-5.3193	3.37e-06	3.14e-05	4.062
ST6GALNAC4	0.28508	5.4556	5.3167	3.4e-06	3.16e-05	4.0534
AUH	-0.39054	8.576	-5.3176	3.39e-06	3.16e-05	4.0564
SLC16A7	-0.45371	5.1783	-5.3159	3.41e-06	3.17e-05	4.0511
DCTN1	0.3802	7.0359	5.3151	3.42e-06	3.18e-05	4.0484
PSMA1	0.22358	10.679	5.3145	3.42e-06	3.18e-05	4.0463
SLC16A12-AS1	-0.47619	4.4	-5.3121	3.45e-06	3.19e-05	4.0386
ESCO1	-0.32827	6.7091	-5.3127	3.44e-06	3.19e-05	4.0406
NAGLU	0.37801	7.4633	5.312	3.45e-06	3.19e-05	4.0382
PDP1	-0.37037	6.8143	-5.3121	3.45e-06	3.19e-05	4.0384
ENAH	0.36735	6.2495	5.3132	3.44e-06	3.19e-05	4.0421
HIVEP3	0.22662	6.0121	5.313	3.44e-06	3.19e-05	4.0416
TCF12	0.3172	9.1169	5.3135	3.43e-06	3.19e-05	4.043
PSMD2	0.25795	9.7281	5.3116	3.46e-06	3.2e-05	4.0368
NUP85	0.34058	8.0373	5.3094	3.48e-06	3.22e-05	4.0296
RGS2	-0.64207	10.561	-5.3068	3.51e-06	3.24e-05	4.0211
CTXN3	-1.5583	6.3897	-5.3067	3.51e-06	3.24e-05	4.0211
ANO1	0.31483	5.0374	5.3064	3.52e-06	3.25e-05	4.0198
STK33	-0.41485	6.5541	-5.3054	3.53e-06	3.25e-05	4.0166
ECHDC3	-0.54756	8.0095	-5.3024	3.56e-06	3.28e-05	4.0069
GCHFR	-0.49468	5.9306	-5.2994	3.6e-06	3.31e-05	3.9973
HLA-DMA	0.54915	8.7066	5.2991	3.6e-06	3.31e-05	3.9962
GDPD5	0.42411	5.6106	5.2999	3.59e-06	3.31e-05	3.9989
OMD	1.0877	4.1432	5.2987	3.61e-06	3.32e-05	3.9948
PPP2R1B	-0.41591	6.2585	-5.2956	3.65e-06	3.35e-05	3.9846
GLIPR1	0.59495	6.0255	5.2915	3.7e-06	3.39e-05	3.9713
ZNF146	-0.20885	6.9243	-5.2898	3.72e-06	3.41e-05	3.966
CYP2U1	0.30072	7.1456	5.2888	3.73e-06	3.42e-05	3.9627
PPM1K	-0.3651	6.8025	-5.2816	3.82e-06	3.49e-05	3.9393
LYZ	1.2554	8.7386	5.2818	3.82e-06	3.49e-05	3.9398
ETNPPL	-0.74915	3.4772	-5.2829	3.8e-06	3.49e-05	3.9433
ADGRV1	-0.27069	3.8609	-5.2825	3.81e-06	3.49e-05	3.942
CCDC148	-0.53505	6.7742	-5.281	3.83e-06	3.5e-05	3.9373
NAAA	0.3368	6.7474	5.2799	3.84e-06	3.51e-05	3.9336
TRNP1	0.44827	6.1645	5.2797	3.84e-06	3.51e-05	3.9329
CHAC2	0.36987	4.2727	5.2798	3.84e-06	3.51e-05	3.9332
PRKACB	-0.24113	7.3479	-5.2803	3.84e-06	3.51e-05	3.9348
HRASLS2	-0.40853	5.1266	-5.2776	3.87e-06	3.53e-05	3.9261
RABGAP1L	-0.36161	8.4746	-5.2762	3.89e-06	3.54e-05	3.9214
P3H1	0.31269	6.6732	5.2726	3.94e-06	3.58e-05	3.9098
TMEM176B	-0.89911	8.0505	-5.271	3.96e-06	3.6e-05	3.9047
MOV10	0.31216	5.5232	5.2707	3.96e-06	3.6e-05	3.9036
C2orf88	0.61215	6.066	5.2695	3.98e-06	3.61e-05	3.8998
CPA3	0.67617	3.5513	5.2686	3.99e-06	3.62e-05	3.8968
KDELR2	0.21039	9.5956	5.2673	4.01e-06	3.63e-05	3.8926
PDRG1	0.37203	7.5874	5.2672	4.01e-06	3.63e-05	3.8922
CCNE2	0.30785	3.2354	5.268	4e-06	3.63e-05	3.8948
PPP1R13L	0.32428	5.0408	5.2661	4.02e-06	3.64e-05	3.8886
IL4I1	0.49976	5.4237	5.266	4.02e-06	3.64e-05	3.8884
KL	-0.60765	8.4368	-5.2663	4.02e-06	3.64e-05	3.8893
ANGPTL3	-0.81994	5.5458	-5.2625	4.07e-06	3.68e-05	3.877
KIAA0895	-0.66295	5.4644	-5.2607	4.1e-06	3.7e-05	3.8711
ITGA3	0.33901	9.5517	5.2609	4.09e-06	3.7e-05	3.8717
TERF1	-0.31831	8.9103	-5.2569	4.15e-06	3.74e-05	3.8586
DNAL1	-0.38285	6.1399	-5.2568	4.15e-06	3.74e-05	3.8585
HLA-F	0.34795	11.191	5.2564	4.15e-06	3.75e-05	3.8573
SCAMP3	0.27311	8.7342	5.2547	4.18e-06	3.76e-05	3.8517
PPP5D1	-0.71917	4.9931	-5.253	4.2e-06	3.78e-05	3.8462
FMO4	-0.70536	6.8105	-5.2532	4.2e-06	3.78e-05	3.8468
CPEB4	-0.37103	9.5525	-5.2533	4.2e-06	3.78e-05	3.8469
EFNB2	0.50717	10.272	5.2499	4.24e-06	3.82e-05	3.8361
ATXN7L2	0.26813	3.6204	5.2487	4.26e-06	3.83e-05	3.8319
AFF1	-0.26601	6.5605	-5.2488	4.26e-06	3.83e-05	3.8324
STX18	0.29826	8.2835	5.2486	4.26e-06	3.83e-05	3.8318
C1orf210	-0.45793	3.6662	-5.243	4.34e-06	3.89e-05	3.8135
NFS1	-0.45446	6.0084	-5.2429	4.35e-06	3.89e-05	3.8133
RHOBTB1	0.52403	8.4379	5.2429	4.34e-06	3.89e-05	3.8133
CECR2	-0.38592	5.8403	-5.2424	4.35e-06	3.9e-05	3.8118
TPD52L3	-0.19713	3.6747	-5.2417	4.36e-06	3.9e-05	3.8094
ZNF214	-0.36046	4.5424	-5.2403	4.38e-06	3.92e-05	3.8047
HNF4G	-0.52057	3.5664	-5.2391	4.4e-06	3.93e-05	3.8008
CPLX1	0.47825	4.374	5.2344	4.47e-06	3.99e-05	3.7856
SCAMP1	-0.27046	7.6897	-5.2345	4.47e-06	3.99e-05	3.786
SLIT3	0.48834	6.9104	5.2337	4.48e-06	4e-05	3.7833
WIPF1	0.2464	6.7124	5.2334	4.48e-06	4e-05	3.7825
ABAT	-0.68716	8.6666	-5.2322	4.5e-06	4.01e-05	3.7785
JAM2	0.53302	8.3102	5.2327	4.49e-06	4.01e-05	3.7802
CCR2	0.29974	4.0837	5.232	4.51e-06	4.01e-05	3.7779
EHD3	0.74076	11.088	5.2302	4.53e-06	4.03e-05	3.772
LOC102724880	-0.33761	3.7709	-5.2269	4.58e-06	4.07e-05	3.7613
SLAMF7	0.84102	4.679	5.2272	4.58e-06	4.07e-05	3.7621
FCER1A	0.87822	4.1916	5.2233	4.64e-06	4.12e-05	3.7495
LRRC8E	-0.26136	3.4962	-5.2211	4.67e-06	4.15e-05	3.7423
BMP2	0.95657	9.3813	5.218	4.72e-06	4.19e-05	3.7322
MAEA	0.29728	8.5466	5.2152	4.76e-06	4.22e-05	3.7232
TASP1	-0.40052	7.3028	-5.2156	4.76e-06	4.22e-05	3.7245
LOC101927681	0.77626	3.731	5.2124	4.81e-06	4.26e-05	3.7143
MTMR9LP	0.48428	6.594	5.2111	4.83e-06	4.27e-05	3.7099
BCL11B	0.25322	3.4391	5.2104	4.84e-06	4.28e-05	3.7077
FOXO3	-0.43835	9.1156	-5.2086	4.87e-06	4.3e-05	3.7017
RABGGTB	-0.27694	9.2633	-5.209	4.86e-06	4.3e-05	3.703
VIM	0.22251	12.647	5.2084	4.87e-06	4.3e-05	3.7012
PCNA	0.31077	8.5122	5.2071	4.89e-06	4.32e-05	3.6969
GABRB3	-0.3176	4.0316	-5.2049	4.93e-06	4.35e-05	3.6899
NSMCE4A	0.28934	7.2684	5.2003	5.01e-06	4.41e-05	3.6748
FXR2	-0.22785	7.236	-5.2003	5.01e-06	4.41e-05	3.6748
HSPA6	-1.1782	5.9575	-5.1991	5.03e-06	4.42e-05	3.6711
SLC26A4	-0.94039	5.6322	-5.1974	5.06e-06	4.45e-05	3.6654
ZNF792	0.67279	5.5917	5.1964	5.07e-06	4.46e-05	3.6621
SPATA2L	-0.67335	7.5969	-5.1959	5.08e-06	4.47e-05	3.6605
CD109	0.3751	7.2903	5.1933	5.13e-06	4.5e-05	3.652
CTSK	0.4788	6.7467	5.1921	5.14e-06	4.52e-05	3.6483
QSOX1	0.31005	8.146	5.1914	5.16e-06	4.52e-05	3.646
SF1	0.28269	9.3669	5.1919	5.15e-06	4.52e-05	3.6476
MYOF	0.44442	8.6929	5.1905	5.17e-06	4.53e-05	3.6431
STC1	-0.78368	5.0411	-5.1895	5.19e-06	4.54e-05	3.6399
MYD88	0.40756	8.0974	5.1884	5.21e-06	4.56e-05	3.6363
SMARCD3	0.39845	7.0971	5.188	5.21e-06	4.56e-05	3.6351
NRIP2	0.3794	8.9358	5.1884	5.21e-06	4.56e-05	3.6361
CR1	-0.34217	7.782	-5.1863	5.25e-06	4.58e-05	3.6294
UHRF1BP1L	-0.24568	5.2961	-5.186	5.25e-06	4.59e-05	3.6284
PLA2G4C	0.63181	8.4559	5.1849	5.27e-06	4.6e-05	3.6251
GUCY1B2	-0.32914	4.4367	-5.1782	5.39e-06	4.7e-05	3.6032
SLC25A33	-0.5834	8.3572	-5.1784	5.38e-06	4.7e-05	3.6038
LOC101928123	0.40963	4.4918	5.1761	5.43e-06	4.73e-05	3.5964
HOXB5	0.38694	6.6821	5.1757	5.43e-06	4.73e-05	3.5951
S100A4	0.85223	9.0282	5.1746	5.45e-06	4.74e-05	3.5915
TNFRSF11A	0.23959	3.1464	5.1744	5.46e-06	4.74e-05	3.591
MARS2	-0.44845	5.2778	-5.1744	5.46e-06	4.74e-05	3.5909
CYTH4	0.23594	5.4501	5.1728	5.49e-06	4.76e-05	3.5856
ZNF763	0.41781	3.2347	5.1729	5.48e-06	4.76e-05	3.5862
EP400	0.19866	6.4857	5.1728	5.49e-06	4.76e-05	3.5856
ING2	-0.39312	7.5543	-5.1722	5.5e-06	4.77e-05	3.5838
EPPK1	-0.68729	6.473	-5.1715	5.51e-06	4.77e-05	3.5817
TTC9C	0.22207	4.9107	5.171	5.52e-06	4.78e-05	3.58
MSL3	0.289	6.3821	5.1699	5.54e-06	4.8e-05	3.5762
HSBP1	0.20148	10.452	5.1696	5.54e-06	4.8e-05	3.5755
POLR1A	0.3939	5.2125	5.1663	5.6e-06	4.85e-05	3.5647
IGSF11	-0.84359	5.4663	-5.1648	5.63e-06	4.86e-05	3.5599
EFHD2	0.38886	6.3204	5.1651	5.63e-06	4.86e-05	3.5607
TFPI2	0.87451	7.9477	5.1654	5.62e-06	4.86e-05	3.5619
PKN1	0.33536	6.623	5.1636	5.66e-06	4.88e-05	3.5558
ACSM3	-0.86335	5.4833	-5.1635	5.66e-06	4.88e-05	3.5557
CDC42BPB	0.4077	6.7877	5.1627	5.67e-06	4.89e-05	3.5529
SLC23A3	-1.3117	7.1856	-5.1615	5.69e-06	4.9e-05	3.5493
CMPK2	0.51059	9.3635	5.1586	5.75e-06	4.95e-05	3.5397
LOC375196	0.382	3.9121	5.1567	5.79e-06	4.98e-05	3.5337
MPC1	-0.27632	9.3671	-5.1554	5.81e-06	5e-05	3.5294
RAB20	-0.55533	8.3178	-5.1537	5.84e-06	5.02e-05	3.5238
RHBDD3	0.36443	6.286	5.1524	5.87e-06	5.04e-05	3.5198
RASGRP3	0.41531	9.6948	5.1518	5.88e-06	5.05e-05	3.5178
FAAH	-0.34164	6.0338	-5.1494	5.93e-06	5.08e-05	3.5101
SRD5A2	-0.23916	4.0658	-5.1499	5.92e-06	5.08e-05	3.5117
RGN	-0.65138	8.2459	-5.1495	5.93e-06	5.08e-05	3.5104
ESRP1	-0.52626	5.989	-5.1482	5.95e-06	5.1e-05	3.5059
CMTM7	0.49597	6.9299	5.1473	5.97e-06	5.11e-05	3.5031
TMEM186	0.28794	7.2355	5.1465	5.99e-06	5.12e-05	3.5005
MGAT4B	0.3475	8.7339	5.1444	6.03e-06	5.15e-05	3.4937
DIP2C	-0.38824	7.426	-5.1431	6.05e-06	5.17e-05	3.4897
AOC1	-1.2648	8.2023	-5.1432	6.05e-06	5.17e-05	3.4897
KIAA0226L	0.6719	4.6152	5.1428	6.06e-06	5.17e-05	3.4886
MAGI2	-0.3798	9.2637	-5.1319	6.28e-06	5.36e-05	3.4533
THCAT158	-0.3145	4.3373	-5.1299	6.32e-06	5.38e-05	3.4469
TFAP2C	-0.36121	4.1406	-5.1303	6.32e-06	5.38e-05	3.4481
ZAP70	0.24226	4.0673	5.13	6.32e-06	5.38e-05	3.4473
PLPP1	0.3302	11.531	5.1304	6.31e-06	5.38e-05	3.4483
AES	0.44012	7.9536	5.1291	6.34e-06	5.39e-05	3.4442
BCAS1	-0.23592	3.9467	-5.1296	6.33e-06	5.39e-05	3.4458
DNM1P35	-0.25549	4.0102	-5.1282	6.36e-06	5.4e-05	3.4414
SRPRA	0.24308	8.5416	5.1283	6.36e-06	5.4e-05	3.4416
DOLK	0.38477	7.317	5.1259	6.41e-06	5.44e-05	3.4338
GUK1	0.28857	9.2817	5.1251	6.43e-06	5.45e-05	3.4313
CALB1	-1.9351	7.6674	-5.1251	6.43e-06	5.45e-05	3.4312
LEO1	0.39634	7.9637	5.124	6.45e-06	5.47e-05	3.4276
WNT5B	0.27507	4.9198	5.1228	6.47e-06	5.48e-05	3.4239
CES2	-0.35544	8.0111	-5.1215	6.5e-06	5.5e-05	3.4196
BEAN1	0.57986	3.8375	5.1208	6.52e-06	5.51e-05	3.4173
LSMEM1	-0.26503	4.5368	-5.1204	6.53e-06	5.52e-05	3.4162
FAM101B	0.41488	9.8684	5.1173	6.59e-06	5.57e-05	3.4059
LAT	0.46789	5.763	5.1158	6.63e-06	5.6e-05	3.4012
CCNB2	0.56267	5.386	5.1143	6.66e-06	5.62e-05	3.3964
GGT6	-0.87592	5.2754	-5.1132	6.68e-06	5.63e-05	3.393
SSUH2	0.64236	4.9417	5.1137	6.67e-06	5.63e-05	3.3944
RBKS	-0.46027	7.5858	-5.1133	6.68e-06	5.63e-05	3.3932
TMOD1	0.63985	8.9762	5.1109	6.73e-06	5.67e-05	3.3856
DKFZP586I1420	0.38687	8.1702	5.1095	6.77e-06	5.69e-05	3.3807
CLEC4A	0.50953	5.6258	5.1096	6.76e-06	5.69e-05	3.3813
RDH12	-0.74266	4.5299	-5.1089	6.78e-06	5.7e-05	3.3788
WDR49	-0.60918	5.0979	-5.1086	6.79e-06	5.7e-05	3.378
EYA2	-0.50378	5.6983	-5.108	6.8e-06	5.7e-05	3.3761
SMAD6	0.33082	7.2577	5.1079	6.8e-06	5.7e-05	3.3756
ZNF10	-0.33635	5.4135	-5.1081	6.8e-06	5.7e-05	3.3764
TP53INP1	0.30407	7.3883	5.1087	6.78e-06	5.7e-05	3.3784
MT1G	-1.3039	10.557	-5.1076	6.81e-06	5.71e-05	3.3748
GRN	0.33119	9.4194	5.1065	6.83e-06	5.72e-05	3.3711
DCHS1	0.38203	6.8485	5.1034	6.91e-06	5.78e-05	3.361
ENTPD7	0.31368	5.9113	5.1021	6.93e-06	5.8e-05	3.3571
RABGGTA	0.33343	6.4101	5.1008	6.97e-06	5.82e-05	3.3527
ZNRF2	-0.32999	6.7907	-5.1004	6.97e-06	5.83e-05	3.3516
MYH11	0.50391	6.2198	5.0997	6.99e-06	5.84e-05	3.3493
POPDC2	0.70489	6.677	5.0985	7.02e-06	5.86e-05	3.3452
GABRE	0.30804	3.4891	5.0972	7.05e-06	5.88e-05	3.3412
MET	-0.5172	5.1388	-5.0968	7.06e-06	5.89e-05	3.3398
TRAV39	0.88089	4.9397	5.0947	7.11e-06	5.92e-05	3.3332
ZSWIM5	-0.40298	6.8454	-5.0919	7.17e-06	5.97e-05	3.324
FAM110A	0.69933	6.0959	5.0918	7.17e-06	5.97e-05	3.3238
GALNT1	0.2404	8.4982	5.0894	7.23e-06	6.02e-05	3.316
FOXJ1	-0.27192	4.7746	-5.0869	7.29e-06	6.06e-05	3.308
GNAS-AS1	-0.27881	3.1149	-5.0863	7.31e-06	6.07e-05	3.306
ZNF721	-0.40806	7.8969	-5.0864	7.3e-06	6.07e-05	3.3064
CD209	0.21355	4.5143	5.0853	7.33e-06	6.08e-05	3.3027
FAM127A	0.28314	9.0472	5.0857	7.32e-06	6.08e-05	3.3041
HOMER1	-0.94171	7.0258	-5.0836	7.37e-06	6.11e-05	3.2971
LILRA1	0.63662	4.7238	5.0832	7.38e-06	6.12e-05	3.2961
PHOSPHO2	-0.45296	6.641	-5.0815	7.42e-06	6.15e-05	3.2904
HINFP	-0.38103	6.5273	-5.0806	7.45e-06	6.16e-05	3.2876
LOC101928043	0.25389	3.0292	5.0804	7.45e-06	6.17e-05	3.287
SUCO	-0.26156	9.0862	-5.0802	7.46e-06	6.17e-05	3.2863
44443	0.27966	5.4966	5.0787	7.49e-06	6.19e-05	3.2815
TTC31	0.29939	5.9593	5.0788	7.49e-06	6.19e-05	3.2818
PRMT5	-0.3701	8.1917	-5.0768	7.54e-06	6.23e-05	3.2754
SGPP1	-0.35112	6.0872	-5.0759	7.56e-06	6.24e-05	3.2723
MFSD10	0.31568	6.6616	5.0746	7.6e-06	6.25e-05	3.2682
FSTL1	0.31018	10.395	5.0754	7.58e-06	6.25e-05	3.2707
PRDM11	-0.25725	4.9132	-5.0754	7.58e-06	6.25e-05	3.2707
TSPAN7	0.52817	9.7656	5.0748	7.59e-06	6.25e-05	3.2688
GALM	-0.67297	6.6229	-5.0735	7.62e-06	6.26e-05	3.2647
CSRP2	0.51584	8.5081	5.0738	7.61e-06	6.26e-05	3.2657
C11orf96	-0.93297	9.4897	-5.0742	7.61e-06	6.26e-05	3.2668
RBM11	-0.64098	4.3938	-5.0733	7.63e-06	6.26e-05	3.2639
LRRC1	-0.44848	8.4057	-5.074	7.61e-06	6.26e-05	3.2661
LOC729683	0.2135	5.4131	5.074	7.61e-06	6.26e-05	3.2661
MLXIPL	-0.32839	5.243	-5.0709	7.69e-06	6.31e-05	3.2561
CLEC4E	-0.7943	5.1892	-5.0686	7.75e-06	6.35e-05	3.249
METTL21B	-0.5381	6.3248	-5.0683	7.76e-06	6.36e-05	3.2479
IL15RA	0.40379	6.8682	5.0655	7.83e-06	6.41e-05	3.2388
SLC34A1	-0.84418	7.8182	-5.0649	7.84e-06	6.42e-05	3.237
UGCG	-0.4174	9.7638	-5.0626	7.9e-06	6.46e-05	3.2297
FAM89B	0.29503	6.6623	5.0615	7.93e-06	6.48e-05	3.2261
LOC100506125	-0.62175	3.2906	-5.0564	8.07e-06	6.58e-05	3.2095
RNF212B	-1.2441	6.5898	-5.0567	8.06e-06	6.58e-05	3.2104
ETS2	0.2218	9.7347	5.0569	8.05e-06	6.58e-05	3.2112
NPTXR	0.41646	3.7464	5.0564	8.07e-06	6.58e-05	3.2094
MGAT2	0.19091	7.1207	5.0562	8.07e-06	6.58e-05	3.209
EMCN	0.36816	11.513	5.0563	8.07e-06	6.58e-05	3.2092
TSPYL5	-0.34895	8.9089	-5.0562	8.07e-06	6.58e-05	3.2089
FOLR1	-0.62799	7.8765	-5.0548	8.11e-06	6.6e-05	3.2045
CALML3	-0.4172	5.4449	-5.0533	8.15e-06	6.63e-05	3.1995
FGA	-0.87265	3.5296	-5.0529	8.16e-06	6.64e-05	3.1983
USP25	-0.23679	7.8411	-5.052	8.18e-06	6.65e-05	3.1954
IFT81	-0.34109	7.0415	-5.0515	8.2e-06	6.66e-05	3.1938
ADGRG2	0.68645	3.3771	5.0508	8.22e-06	6.67e-05	3.1916
CPNE8	-0.24599	8.8073	-5.0493	8.26e-06	6.7e-05	3.1867
MYEF2	-0.30139	7.0745	-5.0485	8.28e-06	6.72e-05	3.184
LOC440173	-0.72845	6.4678	-5.0473	8.31e-06	6.74e-05	3.1801
RER1	0.20792	8.371	5.0441	8.4e-06	6.81e-05	3.1699
NUDT16	-0.26076	7.0708	-5.0439	8.41e-06	6.81e-05	3.1693
OPA1	-0.26071	7.5467	-5.039	8.54e-06	6.92e-05	3.1534
ABI3	0.31499	7.3704	5.0367	8.61e-06	6.96e-05	3.1459
SLC10A2	-1.4982	5.7302	-5.0367	8.61e-06	6.96e-05	3.1461
GLRX	-0.39408	7.1895	-5.0352	8.65e-06	6.99e-05	3.1414
CLEC10A	0.54837	4.8386	5.031	8.77e-06	7.08e-05	3.1277
NRM	0.38383	6.695	5.0312	8.77e-06	7.08e-05	3.1282
ARRDC4	-0.57922	11.488	-5.0301	8.8e-06	7.1e-05	3.1247
LGALS1	0.52107	10.198	5.0288	8.84e-06	7.13e-05	3.1207
ALDH4A1	-0.55622	6.7055	-5.0241	8.98e-06	7.23e-05	3.1054
FZD8	-0.47646	6.7088	-5.023	9.01e-06	7.25e-05	3.1021
CCDC91	-0.40252	9.3258	-5.0212	9.06e-06	7.29e-05	3.0962
CRISPLD2	-1.2125	7.642	-5.0207	9.08e-06	7.3e-05	3.0945
ATR	0.34862	7.1831	5.0202	9.09e-06	7.31e-05	3.093
NXF3	0.59065	4.9005	5.0196	9.11e-06	7.32e-05	3.091
SLAIN2	-0.21306	6.8799	-5.019	9.13e-06	7.33e-05	3.0891
CD72	0.25032	4.5992	5.0174	9.17e-06	7.37e-05	3.0841
PNP	-0.58981	7.775	-5.0164	9.21e-06	7.38e-05	3.0807
ITFG1	0.27221	9.7956	5.0165	9.2e-06	7.38e-05	3.081
CDS1	-0.55746	7.9092	-5.0156	9.23e-06	7.4e-05	3.078
LINC00526	-0.50019	5.8927	-5.0151	9.24e-06	7.4e-05	3.0767
ARHGAP30	0.39578	5.3072	5.0151	9.24e-06	7.4e-05	3.0767
AKR1A1	-0.48988	9.744	-5.0126	9.32e-06	7.46e-05	3.0685
SASH3	0.65809	5.5963	5.0125	9.32e-06	7.46e-05	3.0683
CCDC6	-0.27237	8.5345	-5.012	9.34e-06	7.47e-05	3.0665
FEM1C	-0.3626	7.9135	-5.0114	9.36e-06	7.48e-05	3.0645
DSEL	-0.28712	5.4598	-5.0106	9.38e-06	7.49e-05	3.0622
TRAK2	0.30127	10.287	5.009	9.43e-06	7.53e-05	3.0571
ADAMTS6	0.45452	3.7801	5.0084	9.45e-06	7.54e-05	3.055
PSMA3-AS1	0.31689	7.6339	5.0085	9.45e-06	7.54e-05	3.0553
ERAP2	-1.3977	6.5781	-5.0081	9.46e-06	7.54e-05	3.0539
FAM160B2	0.27733	6.3969	5.0082	9.46e-06	7.54e-05	3.0543
RBAKDN	-0.25085	4.2907	-5.0072	9.49e-06	7.55e-05	3.0513
BDH2	-0.42454	8.5848	-5.0071	9.49e-06	7.55e-05	3.0509
HLA-C	0.25374	12.335	5.0066	9.51e-06	7.56e-05	3.0492
CYGB	0.23003	4.7044	5.0047	9.57e-06	7.61e-05	3.0431
NIN	0.28918	6.2806	5.0036	9.6e-06	7.63e-05	3.0395
SLC14A1	0.59861	8.9385	5.0037	9.6e-06	7.63e-05	3.0399
FAS	0.33813	5.5727	5.0031	9.62e-06	7.64e-05	3.0379
PSKH2	-0.35277	4.4362	-5.0028	9.63e-06	7.64e-05	3.037
DCXR	-0.59609	8.6086	-4.9992	9.74e-06	7.73e-05	3.0254
ZNF710	0.18888	5.3618	4.9975	9.8e-06	7.76e-05	3.0201
CDH16	-0.60211	6.796	-4.997	9.82e-06	7.77e-05	3.0183
USP27X	-0.36867	6.3584	-4.9955	9.86e-06	7.8e-05	3.0136
KLF3	0.23271	7.3888	4.9959	9.85e-06	7.8e-05	3.0148
PTTG3P	0.19746	3.2663	4.9922	9.97e-06	7.88e-05	3.0031
SLC7A7	-0.78622	9.4098	-4.992	9.98e-06	7.88e-05	3.0022
CLEC2B	0.51276	7.0461	4.9921	9.97e-06	7.88e-05	3.0027
WTAP	-0.25359	9.8177	-4.9916	9.99e-06	7.89e-05	3.0011
ZCCHC11	-0.24685	4.8355	-4.9891	1.01e-05	7.95e-05	2.9931
OASL	-0.45108	4.6788	-4.9889	1.01e-05	7.95e-05	2.9925
BZW2	0.38195	7.9473	4.9863	1.02e-05	8.01e-05	2.9839
IL17D	0.30564	3.7505	4.9866	1.02e-05	8.01e-05	2.9851
ID3	0.58919	8.7699	4.9854	1.02e-05	8.03e-05	2.9812
ESPN	-0.31863	4.487	-4.9854	1.02e-05	8.03e-05	2.9811
SSX2IP	-0.23315	5.8432	-4.9837	1.03e-05	8.06e-05	2.9758
SMAD9	0.38779	5.0668	4.9842	1.02e-05	8.06e-05	2.9771
FAM221A	-0.49422	5.1707	-4.9821	1.03e-05	8.1e-05	2.9704
BFSP1	0.52276	6.1624	4.9821	1.03e-05	8.1e-05	2.9706
ACAA1	-0.41174	9.1684	-4.9803	1.04e-05	8.14e-05	2.9649
TSLP	-0.50687	4.5804	-4.9798	1.04e-05	8.15e-05	2.963
DYRK2	0.33225	6.0242	4.9784	1.04e-05	8.18e-05	2.9585
TMEM104	0.3383	7.1098	4.9769	1.05e-05	8.22e-05	2.9539
IL1B	1.1309	6.4578	4.9746	1.06e-05	8.28e-05	2.9465
TADA2B	-0.28725	7.2329	-4.9735	1.06e-05	8.3e-05	2.9429
ZNRF1	0.37217	6.6834	4.9731	1.06e-05	8.31e-05	2.9415
FAM160A2	-0.26983	6.2109	-4.9727	1.06e-05	8.32e-05	2.9403
P4HB	0.27872	8.4283	4.9711	1.07e-05	8.36e-05	2.9351
SUCNR1	1.1124	6.8101	4.9679	1.08e-05	8.44e-05	2.9248
MUS81	0.25607	8.0368	4.967	1.08e-05	8.46e-05	2.9221
CLDN4	-0.48515	6.0688	-4.9655	1.09e-05	8.5e-05	2.9172
MTTP	-0.94346	4.2999	-4.9653	1.09e-05	8.5e-05	2.9165
NRIP1	-0.4793	9.0394	-4.9618	1.1e-05	8.6e-05	2.9053
GNL3	-0.48164	8.2843	-4.9609	1.11e-05	8.61e-05	2.9026
FIBIN	0.86901	7.1378	4.9603	1.11e-05	8.63e-05	2.9005
RXRA	0.20957	7.3496	4.9603	1.11e-05	8.63e-05	2.9004
FOLR2	0.65558	5.5262	4.9569	1.12e-05	8.72e-05	2.8898
PTAFR	0.22772	5.1833	4.9562	1.12e-05	8.73e-05	2.8875
GNGT2	0.31766	5.4289	4.9528	1.14e-05	8.83e-05	2.8766
FAM163A	-0.29777	3.6384	-4.9517	1.14e-05	8.85e-05	2.873
SLC30A9	-0.22367	10.019	-4.9515	1.14e-05	8.86e-05	2.8722
TBL3	0.34781	6.4022	4.9508	1.14e-05	8.87e-05	2.8701
TTC25	-0.4144	5.4257	-4.9505	1.14e-05	8.87e-05	2.8691
DNAJC6	-0.33818	5.5246	-4.9509	1.14e-05	8.87e-05	2.8703
PECR	-0.50075	5.6308	-4.9499	1.15e-05	8.88e-05	2.8674
ZNF781	0.45602	4.2056	4.948	1.15e-05	8.93e-05	2.8612
DNPH1	-0.42025	6.7179	-4.9473	1.16e-05	8.95e-05	2.8589
RHBDD1	-0.26373	7.2909	-4.9469	1.16e-05	8.96e-05	2.8577
UBE2I	0.20737	7.8091	4.9463	1.16e-05	8.97e-05	2.8556
TUBGCP6	0.37548	4.1835	4.9443	1.17e-05	9.03e-05	2.8493
NAMPT	-0.50264	8.2159	-4.9437	1.17e-05	9.04e-05	2.8473
BIN1	-0.31612	7.0594	-4.9438	1.17e-05	9.04e-05	2.8476
PIAS1	-0.31775	8.3612	-4.9419	1.18e-05	9.08e-05	2.8414
TRAK1	0.22269	6.6878	4.9414	1.18e-05	9.09e-05	2.84
TMED6	-1.6052	5.6973	-4.9404	1.18e-05	9.12e-05	2.8369
SORCS1	-0.50547	3.7807	-4.9386	1.19e-05	9.17e-05	2.831
SLPI	-0.7499	7.1745	-4.9384	1.19e-05	9.17e-05	2.8305
GPR137B	-0.43459	8.4384	-4.9377	1.19e-05	9.19e-05	2.8281
AGPAT1	0.36975	7.8897	4.9367	1.2e-05	9.21e-05	2.825
TMF1	-0.32004	6.7808	-4.9344	1.21e-05	9.28e-05	2.8177
COG2	0.34926	7.5925	4.9339	1.21e-05	9.29e-05	2.8158
FANCF	0.34203	6.4768	4.9328	1.21e-05	9.32e-05	2.8126
GGH	-0.76682	7.863	-4.9299	1.22e-05	9.4e-05	2.803
UBD	1.2277	7.2555	4.9282	1.23e-05	9.45e-05	2.7977
TRIB2	0.34485	10.437	4.9275	1.23e-05	9.46e-05	2.7955
S100A11	0.33353	8.8074	4.9274	1.23e-05	9.46e-05	2.7952
ABHD14A	0.41081	6.9708	4.9266	1.24e-05	9.48e-05	2.7927
OAZ2	0.26978	8.5274	4.9262	1.24e-05	9.49e-05	2.7913
PLAGL1	-0.48931	6.2487	-4.9239	1.25e-05	9.56e-05	2.7838
USB1	0.35387	6.0648	4.924	1.25e-05	9.56e-05	2.7843
OAS1	0.63565	7.6729	4.9229	1.25e-05	9.58e-05	2.7807
CD300LF	0.58583	5.6019	4.922	1.26e-05	9.61e-05	2.7778
BANK1	-0.58704	6.1353	-4.9216	1.26e-05	9.61e-05	2.7766
SEH1L	-0.29725	7.2535	-4.9196	1.27e-05	9.67e-05	2.7702
ZNF195	-0.62798	6.5444	-4.9191	1.27e-05	9.68e-05	2.7687
NAGA	0.28033	6.917	4.9165	1.28e-05	9.76e-05	2.7604
BMP4	0.84657	6.374	4.9165	1.28e-05	9.76e-05	2.7602
ADAMTS2	0.37827	4.6941	4.9159	1.28e-05	9.77e-05	2.7583
TBC1D10C	0.38307	5.2959	4.9155	1.28e-05	9.78e-05	2.757
ADD3	-0.20633	10.714	-4.9148	1.29e-05	9.8e-05	2.7549
CALR	0.228	7.6273	4.9136	1.29e-05	9.83e-05	2.7509
PRRT1	0.27957	4.407	4.913	1.29e-05	9.84e-05	2.7492
SOCS1	-0.29699	4.6092	-4.9122	1.3e-05	9.86e-05	2.7466
SIX1	0.30736	4.3432	4.9113	1.3e-05	9.89e-05	2.7435
NT5DC2	0.55013	6.0322	4.9093	1.31e-05	9.95e-05	2.7371
MKRN2	-0.28369	7.9222	-4.9088	1.31e-05	9.96e-05	2.7356
EAF2	-0.55596	5.9581	-4.9076	1.32e-05	9.99e-05	2.7319
EML1	0.42455	8.0401	4.9053	1.33e-05	0.00010064	2.7246
[truncated: 3,002 more rows]

## Sheet: DEGs of GSE37460
DEGs	logFC	AveExpr	t	P.Value	adj.P.Val	B
CALHM2	0.94856	7.4756	13.055	1.6878e-18	1.556e-14	31.478
C8orf4	1.5453	9.1976	12.81	3.7162e-18	1.713e-14	30.73
CYP27B1	-2.217	8.519	-11.764	1.1827e-16	2.7259e-13	27.437
NEDD9	-0.66007	9.6972	-11.768	1.1663e-16	2.7259e-13	27.451
LPAR6	1.1181	9.9896	11.527	2.6337e-16	4.8561e-13	26.673
HLX	1.4436	8.0285	11.395	4.1396e-16	6.3606e-13	26.24
GBP2	1.1361	8.619	10.068	4.3047e-14	5.6693e-11	21.783
CD97	1.1626	7.9753	9.6088	2.2493e-13	2.0736e-10	20.19
FXYD5	0.85347	8.2172	9.618	2.1753e-13	2.0736e-10	20.222
AVPI1	-0.77867	9.1022	-9.6473	1.9567e-13	2.0736e-10	20.325
SERPINH1	0.86707	9.5154	9.4568	3.9086e-13	3.2757e-10	19.657
RHOC	0.77514	10.729	9.2527	8.239e-13	6.3296e-10	18.938
PELI2	-0.57501	9.0414	-9.1654	1.1344e-12	8.0443e-10	18.629
SH2B3	0.8194	9.9017	9.115	1.3652e-12	8.99e-10	18.45
SYT11	0.86641	6.2807	9.0364	1.8232e-12	1.1205e-09	18.17
ZCCHC11	-0.48287	8.5169	-8.851	3.6141e-12	2.0824e-09	17.509
ACTA2	1.3769	10.517	8.8018	4.3352e-12	2.3509e-09	17.333
CDR2L	0.66393	7.6124	8.7526	5.2024e-12	2.6645e-09	17.157
HCLS1	1.1886	9.2659	8.712	6.046e-12	2.6865e-09	17.012
SOX17	1.0375	6.4885	8.7145	5.992e-12	2.6865e-09	17.021
PLEKHO2	0.62485	9.1967	8.7088	6.1196e-12	2.6865e-09	17
SLC19A2	-1.0221	6.8755	-8.6281	8.2578e-12	3.3099e-09	16.71
SLC27A3	0.7013	8.9475	8.6295	8.2134e-12	3.3099e-09	16.716
SIK1	-1.784	7.8635	-8.5183	1.2422e-11	4.7716e-09	16.316
NETO2	1.3554	7.5472	8.2518	3.3591e-11	1.2387e-08	15.353
SIPA1	0.42402	6.9322	8.1412	5.0831e-11	1.7484e-08	14.952
STK10	0.67983	7.5643	8.1392	5.1206e-11	1.7484e-08	14.945
SDF2L1	0.63556	8.9716	8.0663	6.7313e-11	2.2163e-08	14.68
HMHA1	0.9119	8.441	8.0385	7.4702e-11	2.3747e-08	14.58
ARPC1B	0.83316	10.099	7.9641	9.8763e-11	3.035e-08	14.309
MFNG	0.59077	7.6159	7.9119	1.202e-10	3.463e-08	14.119
PCDH12	0.95216	8.8276	7.9179	1.1749e-10	3.463e-08	14.141
BMPR1A	-0.47766	9.3046	-7.8865	1.3224e-10	3.6722e-08	14.027
FCER1G	1.3531	8.6535	7.8773	1.3686e-10	3.6722e-08	13.993
MANF	0.55057	9.8505	7.8724	1.3941e-10	3.6722e-08	13.975
CSK	0.49574	9.1347	7.8506	1.5132e-10	3.7072e-08	13.896
CCRL2	0.77689	7.1939	7.8621	1.4492e-10	3.7072e-08	13.938
ARHGEF6	0.7937	8.8649	7.848	1.5281e-10	3.7072e-08	13.887
CISH	-0.93636	8.766	-7.8313	1.6275e-10	3.7098e-08	13.826
RNASE4	-0.67414	9.0073	-7.8374	1.5902e-10	3.7098e-08	13.848
TWIST1	0.7209	5.4209	7.8276	1.6499e-10	3.7098e-08	13.812
APOH	-1.5147	7.1114	-7.7171	2.5013e-10	5.4903e-08	13.409
COL4A1	0.9358	10.761	7.6142	3.6865e-10	7.724e-08	13.034
PYCARD	1.305	7.3554	7.6191	3.6193e-10	7.724e-08	13.052
LAPTM5	1.3259	9.3597	7.5113	5.4329e-10	1.1106e-07	12.658
REEP4	0.43285	8.5918	7.5061	5.5416e-10	1.1106e-07	12.639
VASH1	0.67625	8.4207	7.4784	6.152e-10	1.2067e-07	12.538
CBR3	0.70283	6.5454	7.4554	6.7083e-10	1.2745e-07	12.454
MCAM	0.58486	7.4549	7.4529	6.7743e-10	1.2745e-07	12.445
GHR	-0.84741	10.75	-7.4452	6.9733e-10	1.2857e-07	12.417
TYROBP	1.8286	8.0689	7.4318	7.3342e-10	1.3258e-07	12.368
FAM119B	-0.66912	7.9615	-7.4204	7.6581e-10	1.3577e-07	12.326
CRIP1	0.94553	7.9286	7.3982	8.3251e-10	1.4224e-07	12.245
IL10RA	1.4883	7.2845	7.398	8.3317e-10	1.4224e-07	12.244
ITGB2	1.4343	7.4601	7.3872	8.6796e-10	1.4289e-07	12.205
FAM176B	0.7027	8.5205	7.3875	8.6697e-10	1.4289e-07	12.206
CASP1	0.87653	7.1302	7.3548	9.8071e-10	1.5862e-07	12.086
SLCO3A1	0.9125	7.4852	7.3326	1.0666e-09	1.6953e-07	12.005
ADA	0.62978	6.441	7.3185	1.1249e-09	1.7578e-07	11.953
PER1	-0.71141	9.1336	-7.3103	1.1602e-09	1.7827e-07	11.924
TMEM140	0.59837	9.2676	7.3004	1.2043e-09	1.82e-07	11.887
LY96	1.2337	7.0144	7.245	1.4845e-09	2.1723e-07	11.685
TIPARP	-0.82171	10.47	-7.2473	1.4719e-09	2.1723e-07	11.693
PSMB10	0.87253	9.0811	7.2128	1.6765e-09	2.415e-07	11.567
CEBPA	0.83324	7.2543	7.194	1.8e-09	2.5143e-07	11.498
GMFG	0.95917	8.7925	7.1945	1.7963e-09	2.5143e-07	11.5
SIRT1	-0.6078	8.9783	-7.1721	1.9553e-09	2.6905e-07	11.418
TCIRG1	0.87802	8.616	7.1248	2.3376e-09	3.1692e-07	11.245
IFI30	1.2534	10.886	7.1145	2.4297e-09	3.2463e-07	11.208
HCK	1.4817	7.4663	7.0641	2.9396e-09	3.8714e-07	11.023
CD53	1.4349	9.2784	7.0564	3.0259e-09	3.929e-07	10.995
CX3CR1	1.6086	8.2377	7.0442	3.1688e-09	4.0574e-07	10.951
TEAD4	0.62271	8.3729	7.0262	3.3916e-09	4.2832e-07	10.885
HBA2	2.9157	11.467	6.9972	3.7841e-09	4.7143e-07	10.779
TM4SF1	0.63113	10.313	6.9708	4.1808e-09	5.0055e-07	10.682
GADD45B	-0.79876	10.184	-6.9747	4.1197e-09	5.0055e-07	10.696
FGL2	1.0621	9.9107	6.9708	4.1808e-09	5.0055e-07	10.682
CSF1R	1.1029	8.0937	6.9593	4.3667e-09	5.1611e-07	10.64
HRG	-1.0473	7.614	-6.953	4.4711e-09	5.2176e-07	10.617
CD14	1.2242	8.6398	6.9353	4.7793e-09	5.3732e-07	10.553
TSC22D3	-0.63409	12.016	-6.9366	4.7559e-09	5.3732e-07	10.557
PLK2	1.1451	7.8368	6.9386	4.7211e-09	5.3732e-07	10.565
CDC37	0.32406	8.8073	6.9305	4.8675e-09	5.399e-07	10.535
TRPV2	0.7067	7.3772	6.9277	4.9194e-09	5.399e-07	10.525
LYL1	0.47538	7.6366	6.9169	5.123e-09	5.5563e-07	10.485
MEF2C	0.46972	7.716	6.9106	5.2467e-09	5.6244e-07	10.462
C11orf71	-0.47426	8.1808	-6.9017	5.4272e-09	5.751e-07	10.43
DUSP1	-0.75412	8.7745	-6.8973	5.5173e-09	5.78e-07	10.414
EPB41L2	0.62205	7.7956	6.8934	5.5997e-09	5.8004e-07	10.399
G6PC	-1.4558	6.0065	-6.8823	5.8395e-09	5.9814e-07	10.359
NFIL3	-0.9137	8.6834	-6.8793	5.9042e-09	5.9814e-07	10.348
IFI35	0.87491	9.2288	6.8739	6.0273e-09	6.0397e-07	10.328
PPIB	0.50186	10.828	6.8644	6.2454e-09	6.1385e-07	10.294
DOK2	0.5659	6.8906	6.8639	6.259e-09	6.1385e-07	10.292
GULP1	-0.4862	8.7777	-6.8601	6.3489e-09	6.1611e-07	10.278
A2M	0.6925	12.255	6.8517	6.554e-09	6.2939e-07	10.247
NMI	0.74384	8.7369	6.8484	6.6362e-09	6.3071e-07	10.235
HBB	2.8326	10.559	6.8434	6.7611e-09	6.3602e-07	10.217
CD48	1.3927	8.0593	6.8295	7.124e-09	6.6339e-07	10.166
QSK	-0.42052	7.788	-6.826	7.219e-09	6.6552e-07	10.153
AHSG	-0.24587	5.5194	-6.8225	7.3152e-09	6.6771e-07	10.141
CTH	-0.54016	6.2423	-6.8023	7.8959e-09	7.1365e-07	10.067
HOXB6	0.61334	7.4362	6.7747	8.7615e-09	7.8419e-07	9.9659
PDK2	-0.58453	8.134	-6.7642	9.1141e-09	8.0791e-07	9.9277
TACC3	0.54066	5.9005	6.7613	9.2161e-09	8.0917e-07	9.917
FOSB	-2.3815	7.8575	-6.7546	9.4525e-09	8.1441e-07	9.8925
SNX5	-0.41381	10.738	-6.7551	9.4316e-09	8.1441e-07	9.8946
HLA-DMB	0.63487	10.465	6.7307	1.0342e-08	8.8279e-07	9.8054
BCL2L13	-0.45471	9.0119	-6.7079	1.1268e-08	9.5024e-07	9.7224
UBE2J1	0.52882	8.4886	6.7063	1.1338e-08	9.5024e-07	9.7164
FSCN1	0.69888	6.7447	6.7032	1.1472e-08	9.5278e-07	9.7051
COL4A2	0.77569	9.6248	6.6925	1.1941e-08	9.7939e-07	9.6662
PSMB9	0.82178	10.683	6.6911	1.2005e-08	9.7939e-07	9.6611
DOCK10	0.90042	6.1538	6.6881	1.2142e-08	9.8194e-07	9.6501
SOX18	0.92353	5.9344	6.6836	1.2349e-08	9.9e-07	9.6337
MICALL1	0.40547	8.341	6.654	1.3805e-08	1.0971e-06	9.5259
DNMT1	0.65912	8.7128	6.6425	1.4419e-08	1.117e-06	9.4838
GK	-1.0519	8.1525	-6.6445	1.431e-08	1.117e-06	9.4911
IFI16	0.67749	9.0256	6.6465	1.4203e-08	1.117e-06	9.4984
ARPC2	0.35761	11.084	6.6319	1.5004e-08	1.1527e-06	9.4453
LAMA2	0.54118	5.8608	6.6207	1.5653e-08	1.1926e-06	9.4043
MICB	0.81037	8.0422	6.6164	1.5908e-08	1.2021e-06	9.3887
ALB	-2.4455	7.7911	-6.5807	1.8197e-08	1.3421e-06	9.2586
AOAH	1.077	6.2665	6.5808	1.8186e-08	1.3421e-06	9.2592
ELOVL1	0.44054	8.7237	6.5838	1.798e-08	1.3421e-06	9.2702
SYNM	0.63958	8.5825	6.5782	1.8364e-08	1.3436e-06	9.2498
ADAMTS1	1.1218	8.9296	6.5721	1.8794e-08	1.3643e-06	9.2274
CD52	1.5062	6.9084	6.5699	1.8947e-08	1.3647e-06	9.2195
BAIAP2	-0.4043	7.5154	-6.5652	1.9285e-08	1.3782e-06	9.2024
C1QA	1.8087	7.1797	6.5158	2.3228e-08	1.6017e-06	9.0224
SLC37A4	-0.66276	9.508	-6.518	2.3036e-08	1.6017e-06	9.0304
GATA3	0.93305	7.7704	6.5195	2.2901e-08	1.6017e-06	9.0361
NR4A2	-1.0899	5.7047	-6.5219	2.2697e-08	1.6017e-06	9.0448
S100A4	0.9349	10.636	6.5152	2.3281e-08	1.6017e-06	9.0202
NRP1	0.66358	8.3374	6.5117	2.3586e-08	1.6106e-06	9.0076
MYD88	0.45835	10.47	6.5071	2.3997e-08	1.6267e-06	8.9909
PDIA4	0.38238	8.8965	6.5004	2.4614e-08	1.6564e-06	8.9663
TAX1BP3	0.43612	10.616	6.4956	2.5055e-08	1.6738e-06	8.9491
CINP	0.51181	8.3714	6.4899	2.5601e-08	1.6979e-06	8.9283
ALDH5A1	-0.43858	6.9596	-6.4847	2.6104e-08	1.7067e-06	8.9095
ARD1A	0.49586	8.4887	6.4855	2.603e-08	1.7067e-06	8.9122
RIN2	0.61318	10.755	6.4795	2.662e-08	1.7282e-06	8.8906
DOCK2	1.024	6.4032	6.4733	2.7246e-08	1.7565e-06	8.8681
CYBB	1.1446	6.5883	6.4615	2.8484e-08	1.8236e-06	8.8251
PHLDA2	1.3572	5.8919	6.4547	2.9219e-08	1.845e-06	8.8004
SFXN3	0.44564	8.4475	6.4558	2.9097e-08	1.845e-06	8.8045
EHBP1L1	0.4025	6.2241	6.448	2.9963e-08	1.8791e-06	8.7761
C9orf167	0.51138	7.0317	6.4347	3.1495e-08	1.9619e-06	8.7279
HTR2B	1.6536	6.3314	6.4222	3.3018e-08	2.0293e-06	8.6822
LIPA	0.51701	11.533	6.4238	3.2823e-08	2.0293e-06	8.6879
WEE1	-0.37941	7.7672	-6.4185	3.3476e-08	2.0438e-06	8.6689
GPR65	0.90189	6.2818	6.4126	3.4229e-08	2.076e-06	8.6474
ARPC4	0.28055	8.287	6.3977	3.6201e-08	2.1813e-06	8.5932
ZFAND5	-0.32168	11.53	-6.3919	3.6998e-08	2.2149e-06	8.5721
HK1	0.34729	10.644	6.3895	3.7325e-08	2.22e-06	8.5636
DDX39	0.64046	8.2069	6.384	3.8109e-08	2.2521e-06	8.5435
NAGK	0.45006	9.7191	6.3813	3.8501e-08	2.2607e-06	8.5336
ARHGEF16	-0.45598	8.1376	-6.3674	4.0551e-08	2.3661e-06	8.4834
ACADM	-0.61777	9.5085	-6.3511	4.3119e-08	2.4961e-06	8.4241
TAP1	0.55333	9.829	6.3498	4.3321e-08	2.4961e-06	8.4195
ARHGDIB	0.62298	10.889	6.3461	4.3928e-08	2.5154e-06	8.4061
PARP12	0.66544	8.906	6.3429	4.4462e-08	2.5302e-06	8.3944
PTPRC	1.1944	6.8055	6.3319	4.6329e-08	2.594e-06	8.3546
RARRES3	0.54463	9.3126	6.3265	4.7271e-08	2.594e-06	8.3352
TUBA1A	0.4326	12.213	6.327	4.719e-08	2.594e-06	8.3368
PTP4A3	0.60272	7.3485	6.3319	4.6329e-08	2.594e-06	8.3546
GIMAP4	0.86069	10.378	6.329	4.6841e-08	2.594e-06	8.344
MICALL2	0.70273	7.3087	6.3299	4.6685e-08	2.594e-06	8.3472
IER5	0.75894	9.09	6.3133	4.9684e-08	2.7103e-06	8.287
SEMA3F	0.33787	7.0423	6.3101	5.0284e-08	2.7163e-06	8.2754
SLC22A8	-1.5441	8.267	-6.3095	5.0383e-08	2.7163e-06	8.2735
TGM2	0.34098	6.878	6.3025	5.1723e-08	2.7723e-06	8.2481
CYP4A11	-0.86686	7.2661	-6.295	5.3201e-08	2.835e-06	8.2209
APOBEC3F	0.51174	5.2823	6.2923	5.3732e-08	2.8469e-06	8.2113
FCN1	1.8487	7.8006	6.2816	5.593e-08	2.9225e-06	8.1725
HCP5	0.67312	8.9253	6.2808	5.6111e-08	2.9225e-06	8.1694
CKLF	0.56019	8.1065	6.2837	5.5505e-08	2.9225e-06	8.1799
GZMA	1.1031	6.4461	6.2721	5.7959e-08	2.9939e-06	8.1381
NDUFS4	-0.42614	8.7494	-6.2689	5.8672e-08	2.9939e-06	8.1262
EBI3	0.42343	5.6866	6.2684	5.8781e-08	2.9939e-06	8.1245
STAB1	0.5347	7.3922	6.2708	5.826e-08	2.9939e-06	8.1331
PDE4B	-0.71982	8.2536	-6.2651	5.9497e-08	3.0111e-06	8.1127
POSTN	1.3229	10.601	6.2639	5.9771e-08	3.0111e-06	8.1083
HN1	0.5753	7.1598	6.261	6.0432e-08	3.0279e-06	8.0977
SMAGP	0.4992	7.8439	6.2561	6.1544e-08	3.0669e-06	8.08
SLC15A3	0.71315	8.3846	6.2533	6.2197e-08	3.0828e-06	8.0698
BBS1	-0.45927	9.3864	-6.2365	6.6242e-08	3.2657e-06	8.0089
UCP2	0.83124	8.5382	6.2252	6.9095e-08	3.3882e-06	7.9682
ZFP36	-0.66859	9.6517	-6.22	7.0458e-08	3.4368e-06	7.9493
UBL3	-0.30864	9.7755	-6.2106	7.2964e-08	3.5403e-06	7.9155
SLC4A4	-0.63235	7.3542	-6.2078	7.3737e-08	3.5405e-06	7.9053
KLHL26	-0.40489	7.1527	-6.2086	7.3526e-08	3.5405e-06	7.9081
TPD52	-0.5008	9.0009	-6.2055	7.4366e-08	3.5522e-06	7.8971
EAF2	-0.66424	6.6533	-6.1936	7.7766e-08	3.6955e-06	7.8539
PRKAR2B	-0.6773	11.24	-6.1893	7.903e-08	3.7363e-06	7.8383
CCNG1	-0.44586	11.039	-6.1818	8.1273e-08	3.8227e-06	7.8113
MAN2B1	0.64515	8.4776	6.1787	8.2219e-08	3.8476e-06	7.8001
PPARG	0.68341	7.0627	6.1754	8.3236e-08	3.8755e-06	7.7882
PKP4	-0.55983	8.0803	-6.1706	8.4753e-08	3.9263e-06	7.7707
SLA	0.67979	8.5617	6.1664	8.6071e-08	3.9477e-06	7.7558
GYG2	-0.43674	6.4076	-6.1666	8.602e-08	3.9477e-06	7.7564
EIF4E2	0.54556	8.7956	6.154	9.0161e-08	4.1148e-06	7.711
LILRB2	0.71906	6.9179	6.1471	9.2517e-08	4.2016e-06	7.686
SNAI2	0.86955	9.427	6.1403	9.4888e-08	4.2881e-06	7.6616
DTYMK	0.4613	7.385	6.1335	9.7332e-08	4.3771e-06	7.637
CASP4	0.63137	7.5571	6.1271	9.9683e-08	4.4611e-06	7.6139
CD248	0.61859	7.7656	6.1169	1.0356e-07	4.612e-06	7.5771
PLAC8	1.3081	6.4592	6.1123	1.0536e-07	4.6699e-06	7.5604
ICAM2	0.80795	10.284	6.1062	1.0776e-07	4.7533e-06	7.5387
HHEX	0.86756	6.6106	6.0956	1.1212e-07	4.9219e-06	7.5004
IFNGR2	0.51377	9.6842	6.0892	1.1485e-07	5.0154e-06	7.4771
LCP2	0.66929	6.7773	6.088	1.1533e-07	5.0154e-06	7.473
STX10	0.49581	8.0202	6.0817	1.1807e-07	5.0393e-06	7.4504
ACOT9	0.4072	9.335	6.0833	1.1739e-07	5.0393e-06	7.456
NECAP2	0.32864	9.6496	6.0845	1.1686e-07	5.0393e-06	7.4604
TSPYL2	-0.48819	9.0382	-6.083	1.1753e-07	5.0393e-06	7.4548
MAP4K4	0.55922	8.0277	6.078	1.1971e-07	5.0858e-06	7.4371
RAC2	0.92663	8.732	6.0721	1.2239e-07	5.1755e-06	7.4157
NT5DC2	0.83861	6.6802	6.0692	1.2374e-07	5.209e-06	7.4051
CYP2B6	-0.48126	5.675	-6.0346	1.4074e-07	5.8812e-06	7.2807
ST13	-0.27613	11.478	-6.0342	1.4099e-07	5.8812e-06	7.279
C10orf2	0.42958	6.4131	6.0191	1.4913e-07	6.1931e-06	7.2248
TRIM38	0.37158	8.5615	6.0116	1.5334e-07	6.3393e-06	7.1979
CFP	0.71088	6.8035	6.0033	1.5818e-07	6.51e-06	7.1679
SEMA4C	0.53115	9.2709	5.9987	1.6087e-07	6.5623e-06	7.1516
TMEM38B	-0.58733	7.8912	-5.9999	1.6018e-07	6.5623e-06	7.1557
IL27RA	0.35342	5.8918	5.9968	1.62e-07	6.5792e-06	7.1448
FES	0.48907	6.3003	5.9926	1.6457e-07	6.6542e-06	7.1296
ZNF331	-0.78184	7.3149	-5.9913	1.6537e-07	6.6575e-06	7.1249
PSMB8	0.50837	10.451	5.9842	1.6982e-07	6.8068e-06	7.0993
HLA-DMA	0.54026	10.563	5.9822	1.711e-07	6.8284e-06	7.0921
SAC3D1	0.58033	7.0953	5.9801	1.724e-07	6.8506e-06	7.0848
LYN	0.92345	7.6937	5.9719	1.7777e-07	7.0336e-06	7.0552
PLEKHA5	-0.39157	9.852	-5.9676	1.8058e-07	7.1146e-06	7.04
GNG11	0.55546	10.906	5.9612	1.8498e-07	7.2567e-06	7.0167
DGKA	0.26885	5.6332	5.9582	1.8705e-07	7.2759e-06	7.006
EED	0.36818	5.6412	5.9587	1.867e-07	7.2759e-06	7.0078
CFD	1.1008	7.0457	5.9547	1.8951e-07	7.31e-06	6.9934
FYB	0.22537	5.7251	5.9552	1.8911e-07	7.31e-06	6.9954
PDLIM1	0.48181	11.593	5.9491	1.9346e-07	7.3955e-06	6.9734
C12orf5	0.76966	7.1202	5.9482	1.9413e-07	7.3955e-06	6.9701
RCN3	0.40311	6.5087	5.9486	1.9386e-07	7.3955e-06	6.9715
HLF	-0.59837	5.9772	-5.9457	1.9593e-07	7.4331e-06	6.9612
NINL	-0.41748	7.7741	-5.9416	1.9893e-07	7.5159e-06	6.9466
SLC6A16	-0.60843	7.4796	-5.9328	2.0556e-07	7.7348e-06	6.9149
CYFIP1	0.29167	11.924	5.9307	2.0714e-07	7.7629e-06	6.9075
INPP5D	0.33235	6.7684	5.9227	2.1344e-07	7.9663e-06	6.8786
RALY	0.42617	8.6895	5.9153	2.1936e-07	8.1542e-06	6.8522
RFTN1	0.52764	10.192	5.9136	2.2075e-07	8.1729e-06	6.8461
TAGLN	1.1222	8.9196	5.9112	2.2271e-07	8.2126e-06	6.8375
MSX1	0.58308	6.5536	5.9081	2.2533e-07	8.2762e-06	6.8262
44450	-0.35946	10.017	-5.9057	2.2733e-07	8.3163e-06	6.8177
44443	0.29059	6.5273	5.9026	2.2992e-07	8.323e-06	6.8068
HNRPDL	-0.29883	10.575	-5.9023	2.3022e-07	8.323e-06	6.8055
HRSP12	-1.1406	9.4289	-5.9038	2.2891e-07	8.323e-06	6.811
PCK1	-1.6332	11.031	-5.8964	2.3532e-07	8.4745e-06	6.7843
RHOBTB2	-0.5674	8.3205	-5.8935	2.3786e-07	8.5325e-06	6.774
TLR1	0.95208	5.3993	5.8905	2.4048e-07	8.5931e-06	6.7634
CYP3A4	-0.53161	6.818	-5.8882	2.4256e-07	8.6338e-06	6.7551
FN1	1.1877	7.9559	5.8855	2.45e-07	8.687e-06	6.7455
NCF2	1.403	7.5801	5.8793	2.5066e-07	8.8377e-06	6.7234
MAP7D1	0.39947	8.6386	5.8788	2.5116e-07	8.8377e-06	6.7215
C1QB	1.799	6.9042	5.8698	2.5966e-07	9.102e-06	6.6893
EGFL7	0.67811	8.3074	5.865	2.6435e-07	9.2312e-06	6.6721
SLC38A2	-0.50673	11.421	-5.863	2.6635e-07	9.2312e-06	6.6648
GBA3	-1.1822	8.223	-5.8636	2.6571e-07	9.2312e-06	6.6671
RASL11B	-0.73138	11.447	-5.8585	2.7082e-07	9.3511e-06	6.6487
MBIP	-0.33823	7.5937	-5.857	2.7232e-07	9.3676e-06	6.6434
ETNK2	-0.7806	6.87	-5.8469	2.8274e-07	9.6897e-06	6.6072
MTHFS	-0.42296	8.4334	-5.845	2.8473e-07	9.7218e-06	6.6004
FLI1	0.44348	6.7411	5.8371	2.9314e-07	9.9181e-06	6.5723
NR3C2	-0.67514	9.1345	-5.8366	2.937e-07	9.9181e-06	6.5704
KDM5A	0.50439	8.2844	5.8378	2.9237e-07	9.9181e-06	6.5748
TSKU	-0.55153	8.7404	-5.8335	2.9704e-07	9.9941e-06	6.5596
PLXND1	0.50247	9.0875	5.8321	2.9863e-07	1.0011e-05	6.5544
DDRGK1	0.42445	9.381	5.8299	3.0104e-07	1.0055e-05	6.5466
GUCY1A3	0.79485	8.3915	5.8125	3.2107e-07	1.0686e-05	6.4845
CSPG4	0.42049	5.6211	5.8101	3.2393e-07	1.0742e-05	6.4759
FBXO21	-0.65209	10.526	-5.8073	3.2733e-07	1.0816e-05	6.4658
SRPX2	0.61755	5.2114	5.8033	3.3218e-07	1.0937e-05	6.4517
TIMELESS	0.34805	7.0982	5.7988	3.3773e-07	1.108e-05	6.4357
ENO2	0.55124	7.0491	5.7963	3.409e-07	1.1145e-05	6.4266
PRODH2	-1.1988	10.495	-5.7909	3.4777e-07	1.1329e-05	6.4074
CD300A	0.82585	6.7698	5.789	3.5026e-07	1.1362e-05	6.4005
TMEM2	-0.58261	8.9623	-5.7882	3.5125e-07	1.1362e-05	6.3978
RASL12	0.64489	6.5958	5.7847	3.5593e-07	1.1473e-05	6.385
HADH	-0.56459	9.6622	-5.7819	3.5954e-07	1.1549e-05	6.3753
SHC2	0.44546	7.2663	5.7774	3.6557e-07	1.1702e-05	6.3592
WASF3	-0.46506	9.0694	-5.7728	3.7186e-07	1.1821e-05	6.3428
ERLIN2	-0.34217	8.3265	-5.7736	3.7084e-07	1.1821e-05	6.3454
DCT	-0.29953	5.7464	-5.77	3.7579e-07	1.1905e-05	6.3326
CCDC85B	0.36586	7.4576	5.7685	3.778e-07	1.1928e-05	6.3275
FAM129A	0.84096	6.723	5.7601	3.8972e-07	1.2262e-05	6.2975
GJA4	0.78959	9.0735	5.7591	3.9114e-07	1.2265e-05	6.294
TWF2	0.50937	7.6755	5.7463	4.1008e-07	1.2815e-05	6.2484
ALDH3A2	-0.55887	9.9534	-5.7439	4.1375e-07	1.2826e-05	6.2398
TGFBI	1.3181	8.6571	5.7434	4.1459e-07	1.2826e-05	6.2379
RBM5	0.35585	10.06	5.7446	4.1274e-07	1.2826e-05	6.2422
ARHGEF15	0.67744	8.4533	5.7337	4.296e-07	1.3246e-05	6.2036
CAPZA1	0.46413	10.67	5.7319	4.3246e-07	1.3289e-05	6.1972
ARHGAP4	0.38026	6.4434	5.729	4.3711e-07	1.3388e-05	6.1868
AFM	-1.1627	7.1223	-5.7214	4.4951e-07	1.3722e-05	6.1599
GSTA3	-0.62316	6.7707	-5.7172	4.5663e-07	1.3893e-05	6.1447
TSTA3	0.4482	8.0223	5.7022	4.8263e-07	1.4636e-05	6.0913
PLEKHA9	0.54121	5.5704	5.6981	4.8988e-07	1.4807e-05	6.0769
STRA6	-0.56915	7.507	-5.6956	4.9448e-07	1.4897e-05	6.0679
ADSL	0.31958	9.5953	5.6891	5.064e-07	1.5207e-05	6.0449
TBX3	0.66184	8.5564	5.6865	5.113e-07	1.5304e-05	6.0357
CLIC1	0.35333	11.59	5.6824	5.1902e-07	1.5485e-05	6.0212
GPX1	0.69245	10.418	5.6804	5.2286e-07	1.5549e-05	6.0141
MTERF	0.33672	7.8999	5.6783	5.2711e-07	1.5625e-05	6.0063
VEGFC	0.84563	8.0944	5.677	5.2947e-07	1.5645e-05	6.002
AIF1	-0.42557	11.611	-5.6666	5.5014e-07	1.6204e-05	5.9651
UBE2I	0.33443	9.9544	5.659	5.6589e-07	1.6614e-05	5.9379
HLA-DRA	0.70232	11.237	5.6571	5.6977e-07	1.6675e-05	5.9313
SLC27A2	-1.4837	9.5924	-5.6527	5.7917e-07	1.6897e-05	5.9155
USP25	-0.33776	9.8445	-5.6487	5.8769e-07	1.7091e-05	5.9014
FAM117A	-0.43137	8.5261	-5.6454	5.9494e-07	1.7248e-05	5.8896
DYRK2	0.34519	5.5201	5.6444	5.97e-07	1.7253e-05	5.8863
LTB	0.63306	6.8644	5.64	6.0684e-07	1.7267e-05	5.8705
PECAM1	0.71431	9.7952	5.6428	6.006e-07	1.7267e-05	5.8805
CCL5	0.83331	6.144	5.6402	6.0626e-07	1.7267e-05	5.8714
TIMM44	0.29684	7.3021	5.6416	6.0332e-07	1.7267e-05	5.8761
WAPAL	0.46373	8.8037	5.6406	6.0543e-07	1.7267e-05	5.8727
POLD3	-0.42202	8.1795	-5.6343	6.1959e-07	1.7575e-05	5.8505
CD36	1.363	5.5289	5.632	6.2495e-07	1.7658e-05	5.8422
SNN	0.28572	6.431	5.6314	6.2634e-07	1.7658e-05	5.84
JAG2	0.55973	8.1667	5.6302	6.2914e-07	1.7683e-05	5.8357
FTCD	-1.1365	8.4357	-5.6242	6.4315e-07	1.8022e-05	5.8145
PTPN6	0.6117	8.2877	5.623	6.4605e-07	1.8048e-05	5.8101
PGF	0.73068	6.2703	5.6178	6.584e-07	1.8283e-05	5.7919
PPIC	0.4301	9.2119	5.6178	6.5831e-07	1.8283e-05	5.792
NR4A1	-0.80471	8.4396	-5.6117	6.7331e-07	1.8585e-05	5.7703
CAMK1	0.58183	6.9286	5.612	6.727e-07	1.8585e-05	5.7712
ALPL	-0.41377	5.2928	-5.6079	6.8273e-07	1.8732e-05	5.7569
LRRC32	0.70252	10.221	5.6083	6.8173e-07	1.8732e-05	5.7583
FUT1	0.5946	7.7187	5.6039	6.9303e-07	1.8958e-05	5.7425
ADORA2A	0.61568	6.7917	5.5965	7.1192e-07	1.9418e-05	5.7166
C19orf2	-0.35974	8.6141	-5.5722	7.7829e-07	2.1165e-05	5.6307
DIP2C	-0.52724	8.7145	-5.5683	7.8971e-07	2.1413e-05	5.6166
MS4A6A	1.1097	8.0904	5.5658	7.9688e-07	2.1544e-05	5.6079
AGTR1	0.95486	9.0161	5.5553	8.2811e-07	2.2295e-05	5.5709
IRF1	0.66604	8.8165	5.5549	8.295e-07	2.2295e-05	5.5693
PQLC1	-0.45612	9.0747	-5.552	8.3842e-07	2.2469e-05	5.559
APOB	-0.27224	4.9169	-5.5478	8.513e-07	2.2748e-05	5.5443
FBP1	-1.1773	10.434	-5.5412	8.72e-07	2.3234e-05	5.5211
CD93	0.69024	9.0236	5.536	8.8889e-07	2.3616e-05	5.5027
FARSA	0.29418	7.8611	5.535	8.923e-07	2.3638e-05	5.499
ALDH2	-0.57137	11.959	-5.5317	9.0295e-07	2.3852e-05	5.4875
TLR2	1.0766	7.6546	5.5294	9.1052e-07	2.3983e-05	5.4795
OSGIN2	-0.36152	6.5697	-5.5263	9.2087e-07	2.4118e-05	5.4686
MUPCDH	-0.74376	5.5874	-5.527	9.1878e-07	2.4118e-05	5.4708
CD247	0.59117	6.7359	5.5222	9.3491e-07	2.4416e-05	5.454
MXI1	-0.45493	9.5595	-5.5101	9.7719e-07	2.5448e-05	5.4114
C3AR1	1.0626	7.7564	5.5092	9.8055e-07	2.5464e-05	5.4081
ID1	0.855	10.459	5.5072	9.8785e-07	2.5582e-05	5.401
ANXA6	0.48766	9.1883	5.5015	1.0085e-06	2.5977e-05	5.381
HK3	0.65964	6.8421	5.5007	1.0116e-06	2.5977e-05	5.3781
FADS1	0.37878	7.544	5.5011	1.01e-06	2.5977e-05	5.3796
PBLD	-1.0929	9.6078	-5.4989	1.018e-06	2.6069e-05	5.372
THBD	0.6888	7.7825	5.4913	1.047e-06	2.6737e-05	5.345
ANXA9	-0.46604	7.1577	-5.4889	1.0562e-06	2.6823e-05	5.3366
SLC7A8	-0.43916	10.222	-5.4896	1.0532e-06	2.6823e-05	5.3392
RHBDF2	0.41374	7.5807	5.4836	1.0769e-06	2.7274e-05	5.3179
XPNPEP2	-1.4241	8.1169	-5.4814	1.0856e-06	2.742e-05	5.3101
CORO1A	0.87061	6.9803	5.4796	1.0925e-06	2.7519e-05	5.304
CYP3A7	-0.84677	6.395	-5.4786	1.0966e-06	2.7547e-05	5.3004
BAX	0.45774	5.877	5.4777	1.1004e-06	2.7567e-05	5.2971
FZD5	-0.28627	6.2124	-5.4639	1.157e-06	2.8906e-05	5.2488
ITIH3	0.52111	6.2921	5.4602	1.173e-06	2.9227e-05	5.2355
PIK3C2B	0.61136	9.4413	5.4585	1.1803e-06	2.9283e-05	5.2296
SLC17A1	-1.2178	7.8301	-5.4582	1.1816e-06	2.9283e-05	5.2285
SLC22A18AS	-0.40765	7.7429	-5.4525	1.2064e-06	2.9816e-05	5.2085
CSTF2T	0.3188	8.1761	5.445	1.2396e-06	3.0557e-05	5.1824
ARG2	-0.82789	7.4765	-5.444	1.2445e-06	3.059e-05	5.1786
WIPF1	0.3736	6.5283	5.4433	1.2476e-06	3.059e-05	5.1762
COL5A2	0.89098	5.9901	5.4398	1.2637e-06	3.0746e-05	5.1638
B4GALT7	0.22534	7.4713	5.4411	1.2577e-06	3.0746e-05	5.1684
GPRC5B	0.37283	8.4437	5.4397	1.264e-06	3.0746e-05	5.1636
SEMA3C	-0.58643	7.0656	-5.4383	1.2704e-06	3.082e-05	5.1588
NPDC1	0.56152	9.1801	5.4365	1.2787e-06	3.094e-05	5.1525
C19orf10	0.3064	9.3773	5.4354	1.2838e-06	3.0982e-05	5.1487
DCBLD2	-0.35913	7.3961	-5.4344	1.2889e-06	3.1023e-05	5.1449
EGF	-1.2964	7.5431	-5.4327	1.2968e-06	3.1133e-05	5.139
MT1G	-1.0245	12.215	-5.431	1.3049e-06	3.1246e-05	5.133
CSTA	1.2759	6.3079	5.4249	1.3341e-06	3.1862e-05	5.1117
FABP1	-1.3918	7.6538	-5.4206	1.3551e-06	3.228e-05	5.0967
SNTA1	-0.37274	8.4872	-5.4195	1.3604e-06	3.2323e-05	5.0929
PYGL	0.65702	7.5418	5.4164	1.3759e-06	3.2593e-05	5.0819
ACSM3	-0.78808	6.7255	-5.4158	1.3788e-06	3.2593e-05	5.0799
GLB1L2	-0.58843	8.9928	-5.4147	1.3846e-06	3.2645e-05	5.0759
CYB5A	-0.46653	11.864	-5.4122	1.3974e-06	3.2864e-05	5.067
TSPO	0.44746	10.456	5.4079	1.4193e-06	3.3293e-05	5.0521
ARC	-0.66481	5.8362	-5.4023	1.4485e-06	3.3893e-05	5.0325
PDCL	0.24953	7.9619	5.3971	1.4765e-06	3.4459e-05	5.0141
GSTA1	-1.692	10.605	-5.3963	1.4807e-06	3.447e-05	5.0113
LRRTM2	-0.32432	4.909	-5.3889	1.521e-06	3.5232e-05	4.9854
UGT2B28	-1.0504	9.1584	-5.3891	1.5199e-06	3.5232e-05	4.9862
C14orf135	-0.47833	7.5123	-5.387	1.5313e-06	3.5381e-05	4.979
ARAP3	0.46209	8.3262	5.382	1.5595e-06	3.5943e-05	4.9614
STOML1	0.31081	8.0661	5.3792	1.5754e-06	3.6218e-05	4.9517
ARHGAP15	0.6519	6.9836	5.3785	1.5796e-06	3.6225e-05	4.9491
HLA-DPA1	0.5164	12.161	5.3752	1.5987e-06	3.6444e-05	4.9375
PLEKHG3	-0.29073	8.532	-5.3748	1.601e-06	3.6444e-05	4.9361
CYFIP2	-0.60986	8.4236	-5.375	1.5999e-06	3.6444e-05	4.9368
GAD1	-0.25441	4.8807	-5.3721	1.6168e-06	3.6711e-05	4.9267
ENTPD1	0.49898	5.5897	5.3701	1.6288e-06	3.6895e-05	4.9196
PPP1R3C	0.85734	9.5461	5.3595	1.6928e-06	3.8174e-05	4.8825
TMEM127	0.2737	9.3775	5.3593	1.6936e-06	3.8174e-05	4.882
RASGRP2	0.37915	6.0126	5.3575	1.7048e-06	3.8332e-05	4.8757
AHCY	-0.65274	9.5853	-5.3565	1.7113e-06	3.8385e-05	4.872
GPD1L	-0.51935	10.813	-5.348	1.7651e-06	3.9496e-05	4.8423
DOCK6	0.3184	7.4573	5.3427	1.7991e-06	4.0159e-05	4.8239
APPBP2	-0.333	9.2167	-5.3358	1.8451e-06	4.1087e-05	4.7996
POLD4	0.40774	8.777	5.3305	1.8807e-06	4.178e-05	4.7812
NUP85	0.47499	8.5255	5.3276	1.9003e-06	4.2113e-05	4.7712
CSTB	0.42959	11.773	5.3236	1.9285e-06	4.2561e-05	4.7571
ORMDL2	0.37274	9.1838	5.3233	1.9303e-06	4.2561e-05	4.7562
KIAA1462	0.86202	7.5689	5.3227	1.9344e-06	4.2561e-05	4.7542
GPR125	-0.46996	8.0783	-5.3173	1.973e-06	4.3308e-05	4.7351
SERPINA6	-1.1447	7.5012	-5.31	2.0259e-06	4.4154e-05	4.7097
PRSS8	-0.67458	6.8671	-5.311	2.0185e-06	4.4154e-05	4.7132
C1orf77	0.27731	8.8899	5.3105	2.0218e-06	4.4154e-05	4.7117
KCNMB1	0.51645	7.2936	5.3063	2.0532e-06	4.4343e-05	4.6968
NOV	-0.68653	8.3111	-5.3072	2.0467e-06	4.4343e-05	4.6999
GLYAT	-1.2477	9.3476	-5.3076	2.0434e-06	4.4343e-05	4.7014
SLC22A11	-1.0236	8.1131	-5.3062	2.0539e-06	4.4343e-05	4.6965
NANS	0.40279	7.952	5.3034	2.075e-06	4.4694e-05	4.6867
TNF	0.36773	6.39	5.3013	2.0906e-06	4.4925e-05	4.6795
UCRC	-0.38965	10.614	-5.2938	2.1481e-06	4.5948e-05	4.6534
PPCDC	0.38421	7.2793	5.294	2.1469e-06	4.5948e-05	4.6539
FKBP11	0.55363	8.1421	5.2891	2.1852e-06	4.6632e-05	4.6369
OPA1	-0.30845	9.296	-5.2884	2.1905e-06	4.6639e-05	4.6346
HSPB8	-0.40558	11.411	-5.2862	2.2079e-06	4.69e-05	4.627
YARS2	0.50863	7.7529	5.2842	2.2245e-06	4.7143e-05	4.6198
RNF186	-1.0455	8.075	-5.2807	2.2524e-06	4.7626e-05	4.6078
LST1	0.742	7.5923	5.2741	2.3071e-06	4.8597e-05	4.5847
CD164	-0.2829	9.9357	-5.2739	2.3089e-06	4.8597e-05	4.584
NKIRAS2	0.25489	8.4773	5.2674	2.3642e-06	4.9647e-05	4.5612
DOCK1	-0.37137	9.2581	-5.2626	2.4053e-06	5.0397e-05	4.5446
TNIP2	0.30907	10.116	5.2614	2.4154e-06	5.0494e-05	4.5406
ITGAM	0.92591	6.8162	5.2585	2.4412e-06	5.0918e-05	4.5304
TNFAIP1	0.30455	9.1868	5.2563	2.4606e-06	5.1207e-05	4.5228
PRR5L	0.37058	5.3438	5.2508	2.51e-06	5.2116e-05	4.5037
LAP3	0.52625	10.307	5.2499	2.5178e-06	5.216e-05	4.5007
FGFR2	-0.44721	7.3074	-5.2467	2.5473e-06	5.2654e-05	4.4895
FAR2	0.5263	7.2629	5.246	2.5539e-06	5.2671e-05	4.487
FADS3	0.37902	7.6984	5.2439	2.5734e-06	5.2956e-05	4.4797
TSPAN13	0.78947	9.4103	5.2422	2.5891e-06	5.316e-05	4.4739
MON1B	0.29876	7.1154	5.2411	2.5991e-06	5.3247e-05	4.4701
IRS2	-0.36332	9.2421	-5.2383	2.6259e-06	5.3676e-05	4.4603
CYP4F3	-1.2067	8.39	-5.2356	2.6514e-06	5.3959e-05	4.451
PLEKHO1	0.45506	7.6611	5.2361	2.6474e-06	5.3959e-05	4.4525
ATXN10	-0.27625	10.047	-5.2349	2.6585e-06	5.3984e-05	4.4484
TNFRSF14	0.39406	7.8064	5.2294	2.7121e-06	5.4931e-05	4.4292
BCAS3	-0.29949	8.4593	-5.2289	2.717e-06	5.4931e-05	4.4275
SCAPER	-0.38505	8.0034	-5.2161	2.8453e-06	5.7398e-05	4.3832
FAM13A	-0.40301	8.1882	-5.2151	2.8554e-06	5.7476e-05	4.3797
ADCY3	0.37863	6.5183	5.2144	2.8627e-06	5.7497e-05	4.3773
KIAA0323	0.26742	8.7773	5.211	2.8981e-06	5.8082e-05	4.3655
POPDC2	0.48942	7.885	5.2089	2.9196e-06	5.8385e-05	4.3584
CARD8	0.4447	8.2336	5.2068	2.9424e-06	5.8714e-05	4.3509
MT1X	-0.79882	10.455	-5.2062	2.9489e-06	5.8717e-05	4.3488
CSRP2	0.49761	8.8213	5.2	3.0151e-06	5.9905e-05	4.3275
RPS6KA3	0.46035	7.781	5.1994	3.0219e-06	5.9912e-05	4.3253
HPD	-1.7052	9.3927	-5.1932	3.0898e-06	6.1127e-05	4.3039
HDAC5	0.44432	7.7571	5.1922	3.101e-06	6.1217e-05	4.3005
ALDH6A1	-1.1428	9.5276	-5.1905	3.1198e-06	6.1457e-05	4.2946
CTNNBIP1	-0.41369	10.008	-5.1876	3.1532e-06	6.1982e-05	4.2844
HAO2	-1.4575	9.3685	-5.187	3.16e-06	6.1983e-05	4.2824
CCDC91	-0.57629	10.248	-5.1811	3.2274e-06	6.3171e-05	4.2621
IRF7	0.81085	7.2961	5.1757	3.2916e-06	6.429e-05	4.2432
PAH	-1.3534	11.135	-5.174	3.3113e-06	6.4539e-05	4.2374
DHRS11	-0.41163	6.9805	-5.17	3.3587e-06	6.5325e-05	4.2238
CAMK2G	-0.36531	7.8344	-5.1669	3.3971e-06	6.5794e-05	4.2128
WARS	0.51552	10.73	5.167	3.3956e-06	6.5794e-05	4.2133
RNF11	-0.33896	10.44	-5.1616	3.4629e-06	6.6929e-05	4.1944
LRRC15	-0.39828	6.2037	-5.1598	3.4848e-06	6.721e-05	4.1884
ILK	0.27481	11.199	5.158	3.5072e-06	6.7502e-05	4.1822
ALOX5	0.85318	5.9405	5.1457	3.6663e-06	7.0046e-05	4.1396
MSN	0.33305	11.376	5.1456	3.6678e-06	7.0046e-05	4.1392
HIST2H2BE	0.5193	7.7828	5.1454	3.6698e-06	7.0046e-05	4.1387
DDX49	0.31772	7.339	5.1461	3.6606e-06	7.0046e-05	4.1411
NOTCH3	0.25956	6.2549	5.1437	3.6919e-06	7.0322e-05	4.1329
CGA	-0.43158	5.7276	-5.1425	3.708e-06	7.0482e-05	4.1288
GLA	0.33357	9.0521	5.1412	3.7259e-06	7.0573e-05	4.1241
SLC12A6	-0.47869	6.6243	-5.1405	3.7357e-06	7.0573e-05	4.1216
MICAL1	0.59164	6.398	5.1405	3.7349e-06	7.0573e-05	4.1218
CUGBP2	0.39782	5.9883	5.1363	3.7921e-06	7.1492e-05	4.1072
STOM	0.43132	11.347	5.1347	3.8135e-06	7.1711e-05	4.1018
COBL	-0.62539	8.4198	-5.1343	3.8193e-06	7.1711e-05	4.1003
PTPRE	0.72207	7.9788	5.1332	3.8338e-06	7.1837e-05	4.0967
RRP8	0.46661	7.8451	5.1317	3.8548e-06	7.2085e-05	4.0914
OSBPL9	-0.30323	11.364	-5.1302	3.8763e-06	7.2338e-05	4.0861
GPR4	0.39189	7.162	5.1295	3.886e-06	7.2374e-05	4.0837
TMEM184B	0.3958	8.7233	5.1265	3.9276e-06	7.3001e-05	4.0735
MOSC2	-0.55102	8.9282	-5.1257	3.9394e-06	7.3074e-05	4.0706
FGR	0.85425	8.1685	5.1245	3.9558e-06	7.3229e-05	4.0666
ADCY1	-0.47185	6.83	-5.121	4.0061e-06	7.4012e-05	4.0545
CD2BP2	0.284	9.0392	5.1197	4.0246e-06	7.4206e-05	4.0501
STX18	0.30676	10.123	5.1189	4.0362e-06	7.4271e-05	4.0473
SALL1	-0.49956	6.2851	-5.1159	4.0795e-06	7.4919e-05	4.037
CCL4	0.86933	8.5668	5.1118	4.1414e-06	7.5904e-05	4.0226
ALDOC	-0.52459	8.434	-5.1097	4.1716e-06	7.6305e-05	4.0156
APOM	-1.2458	9.3134	-5.1084	4.1909e-06	7.6507e-05	4.0112
PEBP1	-0.33573	11.243	-5.104	4.2577e-06	7.7267e-05	3.996
MTMR3	-0.23432	6.5828	-5.1051	4.242e-06	7.7267e-05	3.9996
TRAF3IP3	0.38874	5.5545	5.1042	4.2555e-06	7.7267e-05	3.9965
RNF125	0.3539	5.4727	5.1027	4.2786e-06	7.7495e-05	3.9913
CRELD2	0.33501	11.052	5.1016	4.2949e-06	7.7637e-05	3.9876
CTF1	-0.26904	7.2241	-5.0952	4.3942e-06	7.9276e-05	3.9657
IFITM1	0.66021	11.697	5.0909	4.4634e-06	8.0367e-05	3.9507
SYT13	-0.35322	6.5962	-5.0877	4.5139e-06	8.1119e-05	3.9399
CENPM	0.44176	5.6447	5.0819	4.6086e-06	8.2659e-05	3.92
TNFRSF1B	0.82208	7.0522	5.0809	4.625e-06	8.2701e-05	3.9166
PLSCR3	0.31279	11.337	5.0807	4.6289e-06	8.2701e-05	3.9158
NUP93	0.26514	9.2209	5.0773	4.6855e-06	8.355e-05	3.9041
BRMS1	0.38557	8.4226	5.0764	4.7002e-06	8.365e-05	3.9011
RCAN1	-0.65392	9.2542	-5.0744	4.7344e-06	8.3774e-05	3.8941
GABRR2	-0.26043	6.5998	-5.0752	4.7206e-06	8.3774e-05	3.8969
MSC	0.42598	5.2777	5.0746	4.7307e-06	8.3774e-05	3.8949
WFDC1	0.77434	9.2527	5.0728	4.7611e-06	8.4086e-05	3.8887
CA2	-0.81572	10.664	-5.0665	4.8697e-06	8.5838e-05	3.8671
IFNAR2	0.37218	7.2445	5.0634	4.9239e-06	8.6464e-05	3.8565
IFI44	0.94735	8.9855	5.0639	4.9164e-06	8.6464e-05	3.8579
SLC6A13	-0.75683	8.3953	-5.0606	4.9749e-06	8.7193e-05	3.8466
RIT1	0.49353	7.4457	5.0595	4.9937e-06	8.7356e-05	3.843
TOM1L1	-0.4165	9.1911	-5.0578	5.0245e-06	8.7563e-05	3.8371
SLC17A5	-0.37494	9.364	-5.0582	5.0168e-06	8.7563e-05	3.8385
ABCC2	-0.58451	6.2626	-5.0559	5.0586e-06	8.7992e-05	3.8306
FBN1	0.52769	7.0701	5.0518	5.1329e-06	8.9006e-05	3.8166
MVP	0.2645	9.686	5.0514	5.1399e-06	8.9006e-05	3.8153
LGR4	-0.46902	9.0303	-5.0511	5.1459e-06	8.9006e-05	3.8141
ZAP70	0.2661	5.3649	5.0505	5.158e-06	8.9048e-05	3.8119
ADK	-0.23253	8.6057	-5.0428	5.3006e-06	9.134e-05	3.7857
COL13A1	0.30288	6.0654	5.0397	5.3591e-06	9.2174e-05	3.7752
SLC13A3	-1.1708	9.3871	-5.0357	5.4364e-06	9.333e-05	3.7615
ISG20	0.87869	7.3522	5.0349	5.4523e-06	9.3428e-05	3.7587
DYSF	0.66809	10.487	5.0335	5.4798e-06	9.369e-05	3.7538
TMSB10	0.42722	12.991	5.0331	5.4879e-06	9.369e-05	3.7524
COL1A2	1.4949	8.2554	5.0309	5.5306e-06	9.4246e-05	3.745
LCK	0.37113	5.933	5.0287	5.5754e-06	9.4833e-05	3.7372
TMC6	0.2827	6.5622	5.0274	5.5997e-06	9.5071e-05	3.7331
RHOG	0.33226	10.009	5.0246	5.6579e-06	9.5883e-05	3.7231
THG1L	0.40747	6.4863	5.0234	5.6802e-06	9.6085e-05	3.7194
EMP3	0.59517	9.4661	5.0207	5.7371e-06	9.6869e-05	3.7098
PHYH	-0.57732	10.751	-5.0166	5.821e-06	9.8106e-05	3.6959
CLEC11A	0.38196	6.6475	5.0157	5.8403e-06	9.8251e-05	3.6927
DDC	-0.79609	8.0762	-5.0143	5.8697e-06	9.8565e-05	3.6879
NFKBIE	0.65375	7.3271	5.0061	6.0435e-06	0.0001013	3.6599
FAM48A	0.24088	8.1886	5.0011	6.1521e-06	0.00010293	3.6428
HSPA12A	-0.38	11.084	-4.9998	6.1789e-06	0.0001032	3.6387
PRODH	-0.56147	6.5163	-4.9976	6.2292e-06	0.00010385	3.6309
ID4	-0.50796	8.6499	-4.9957	6.2699e-06	0.00010434	3.6246
NOTCH1	0.4621	7.4334	4.9948	6.2905e-06	0.00010449	3.6215
IFT57	-0.44746	8.6185	-4.9935	6.3207e-06	0.0001048	3.6169
LYPD3	-0.32931	7.4543	-4.9909	6.3798e-06	0.00010559	3.608
FRZB	0.73771	9.1301	4.989	6.423e-06	0.00010612	3.6015
CACNB2	-0.60948	8.0101	-4.9877	6.4531e-06	0.00010642	3.597
C17orf62	0.49937	7.0515	4.9861	6.4901e-06	0.00010684	3.5915
SOX4	0.52601	7.7101	4.982	6.5838e-06	0.00010819	3.5778
BMS1	0.28491	8.6613	4.9802	6.6259e-06	0.00010869	3.5717
MTFR1	-0.50027	7.2058	-4.9746	6.7608e-06	0.00011071	3.5524
SPRY1	0.53091	9.4944	4.974	6.7737e-06	0.00011072	3.5505
DPYS	-1.3586	9.1083	-4.9668	6.9505e-06	0.00011321	3.5258
NFS1	-0.37911	9.3365	-4.967	6.9444e-06	0.00011321	3.5267
RAD17	-0.20971	8.4837	-4.9599	7.1226e-06	0.00011576	3.5024
ESRP1	-0.34352	6.7395	-4.9595	7.1324e-06	0.00011576	3.5011
LTF	1.3147	7.846	4.9562	7.2181e-06	0.00011695	3.4896
TST	-0.46061	11.443	-4.9522	7.3207e-06	0.0001182	3.4761
PPA2	-0.38927	9.6556	-4.9524	7.3162e-06	0.0001182	3.4767
FHOD1	0.36254	7.9583	4.9516	7.3372e-06	0.00011825	3.4739
NKG7	0.71435	6.316	4.9497	7.3864e-06	0.00011884	3.4675
DAPK1	-0.24302	9.7262	-4.9487	7.4126e-06	0.00011885	3.4641
TMBIM1	0.42971	10.737	4.949	7.4051e-06	0.00011885	3.4651
ATXN3	0.35313	5.7226	4.9461	7.4812e-06	0.00011974	3.4553
APLNR	0.75159	10.322	4.9443	7.5299e-06	0.00012031	3.4491
HLA-DRB1	0.51275	12.813	4.9414	7.6074e-06	0.00012134	3.4393
LOC391020	0.35838	8.2836	4.939	7.672e-06	0.00012216	3.4312
PTPN13	-0.50522	8.4784	-4.9368	7.7329e-06	0.00012234	3.4236
CUL2	0.28188	8.9132	4.9375	7.7138e-06	0.00012234	3.4259
TOB1	-0.35327	10.636	-4.9379	7.7031e-06	0.00012234	3.4273
TMEM50A	0.26965	10.842	4.9366	7.7369e-06	0.00012234	3.4231
MCM6	-0.42811	10.505	-4.9355	7.769e-06	0.00012254	3.4191
MAP7	-0.3755	6.9662	-4.9352	7.7756e-06	0.00012254	3.4183
DUSP22	0.34814	10.939	4.9323	7.8566e-06	0.0001236	3.4084
HSPG2	0.33582	5.9526	4.9286	7.9612e-06	0.0001244	3.3957
SIRT3	-0.28216	7.8787	-4.9289	7.9512e-06	0.0001244	3.3969
EML4	-0.34906	7.2709	-4.93	7.9213e-06	0.0001244	3.4005
SH3BGRL3	0.48043	9.3716	4.9287	7.9576e-06	0.0001244	3.3961
SLC25A10	-0.56028	7.1123	-4.9261	8.0315e-06	0.00012507	3.3873
PDE8A	-0.2665	8.468	-4.9262	8.0282e-06	0.00012507	3.3877
ECM2	-0.52899	9.1479	-4.9234	8.1072e-06	0.00012604	3.3783
MT1F	-0.62078	11.424	-4.9171	8.2912e-06	0.00012868	3.3568
CD58	0.38739	8.4585	4.9161	8.3209e-06	0.00012892	3.3533
GATM	-1.0533	11.048	-4.9151	8.3518e-06	0.00012919	3.3498
NUDT3	0.36111	8.3957	4.9145	8.3682e-06	0.00012922	3.3479
NR0B2	-0.49378	6.8021	-4.912	8.442e-06	0.00013015	3.3395
FLJ21736	-0.56439	7.9192	-4.905	8.6552e-06	0.00013321	3.3156
FAM59A	-0.41402	7.9084	-4.904	8.6871e-06	0.00013348	3.3121
ANKRD46	-0.41275	9.7083	-4.9024	8.7365e-06	0.00013401	3.3066
R3HDM2	-0.34857	8.6402	-4.9019	8.7516e-06	0.00013402	3.305
CNNM2	-0.41006	7.592	-4.8978	8.877e-06	0.00013572	3.2913
CEP76	0.41214	5.6415	4.8965	8.919e-06	0.00013613	3.2868
HLA-DQB1	0.91603	9.6028	4.8957	8.9459e-06	0.00013632	3.2839
AZGP1	-1.4558	7.6921	-4.8872	9.2191e-06	0.00014012	3.2551
RASSF2	0.75356	7.2299	4.887	9.226e-06	0.00014012	3.2544
LDLRAP1	0.24363	8.0485	4.8852	9.2819e-06	0.00014074	3.2486
TMEM208	0.30262	9.1206	4.8836	9.3357e-06	0.00014132	3.2431
LRRC1	-0.42194	9.6002	-4.8818	9.3962e-06	0.00014201	3.2369
UBFD1	0.46382	7.1871	4.881	9.4207e-06	0.00014214	3.2344
HOPX	0.75754	8.5307	4.8795	9.4725e-06	0.00014269	3.2292
PCSK1N	-0.63563	7.9969	-4.8788	9.4953e-06	0.0001428	3.2268
TAF1A	0.4661	5.0443	4.8781	9.5203e-06	0.00014294	3.2243
FABP4	1.0562	8.5259	4.8769	9.5603e-06	0.00014331	3.2203
GBP1	0.80971	8.3907	4.8764	9.5768e-06	0.00014333	3.2187
FLOT1	0.23062	10.694	4.8753	9.6154e-06	0.00014367	3.2148
PEG10	-0.35285	6.2242	-4.8744	9.6453e-06	0.00014388	3.2118
SHANK2	-0.35086	6.8978	-4.8737	9.6695e-06	0.00014401	3.2094
ALDH1L1	-1.1202	8.919	-4.8724	9.7148e-06	0.00014445	3.205
UPB1	-1.1531	7.6635	-4.8692	9.8249e-06	0.00014585	3.1942
IGFBP6	0.95044	7.8812	4.8684	9.8526e-06	0.00014603	3.1915
NIPSNAP1	-0.36046	8.6417	-4.8662	9.9278e-06	0.00014691	3.1842
SPRY2	-0.51328	8.36	-4.8657	9.945e-06	0.00014693	3.1825
ANG	-0.3531	6.8872	-4.8638	1.0013e-05	0.00014744	3.176
TPST1	0.37586	8.3472	4.8634	1.0028e-05	0.00014744	3.1746
GPRASP1	-0.47921	8.4014	-4.8641	1e-05	0.00014744	3.1772
CHP2	-0.51044	6.3896	-4.8599	1.0151e-05	0.00014902	3.1629
SDHD	-0.22208	11.973	-4.8585	1.02e-05	0.0001495	3.1583
CDH5	0.76226	9.0259	4.8575	1.0238e-05	0.00014982	3.1547
MPP2	-0.20981	6.6914	-4.8536	1.038e-05	0.00015165	3.1416
GLUD1	-0.39432	10.167	-4.853	1.04e-05	0.00015171	3.1397
MATN2	0.67288	9.3541	4.8519	1.0441e-05	0.00015206	3.1359
TRIAP1	0.26624	9.4885	4.8494	1.0533e-05	0.00015316	3.1275
AKR7A3	-0.7728	9.3969	-4.8474	1.0611e-05	0.00015405	3.1205
INPP4B	0.4357	5.1218	4.8464	1.0647e-05	0.00015409	3.1172
HSD17B14	-0.49099	7.8261	-4.8468	1.063e-05	0.00015409	3.1187
HSPA1L	-0.29543	7.4154	-4.8433	1.0765e-05	0.00015555	3.1067
USP46	-0.69423	9.3053	-4.8428	1.0781e-05	0.00015555	3.1052
ARSF	-0.58489	7.197	-4.8405	1.0872e-05	0.0001566	3.0972
CR2	-0.6716	7.5336	-4.8395	1.0908e-05	0.00015688	3.094
MACROD1	-0.63512	7.3192	-4.8383	1.0954e-05	0.0001573	3.09
MCM5	0.38499	7.2592	4.8343	1.1111e-05	0.00015931	3.0764
NTS	-0.26862	4.7844	-4.8324	1.1187e-05	0.00016014	3.0699
NRAS	0.48404	7.2828	4.8308	1.1248e-05	0.00016076	3.0647
PROCR	0.41212	6.0324	4.8304	1.1265e-05	0.00016076	3.0632
APOA1	-0.25676	5.5406	-4.8263	1.1431e-05	0.00016287	3.0492
COL6A3	1.5755	7.2112	4.8244	1.1505e-05	0.00016343	3.043
KIAA0415	0.33179	6.5106	4.8247	1.1493e-05	0.00016343	3.0441
SLC22A5	-0.58075	8.8483	-4.8232	1.1555e-05	0.00016364	3.0389
FGFBP1	-0.33632	6.4007	-4.8234	1.1546e-05	0.00016364	3.0396
KANK1	-0.40465	11.912	-4.8227	1.1577e-05	0.00016369	3.0371
TNFRSF4	0.37899	6.6253	4.818	1.1767e-05	0.00016613	3.0215
CRYM	-1.0051	9.837	-4.8157	1.1864e-05	0.00016723	3.0136
SLC9A3R1	-0.40555	10.625	-4.8127	1.1989e-05	0.00016874	3.0036
BTG3	-0.42423	10.42	-4.8116	1.2038e-05	0.00016917	2.9997
TLR4	0.42285	6.6554	4.8107	1.2076e-05	0.00016944	2.9967
EYA1	-0.2219	5.3277	-4.8051	1.2315e-05	0.00017243	2.9779
CHST7	0.43665	5.8894	4.8048	1.2326e-05	0.00017243	2.977
SUCLG1	-0.45483	11.977	-4.8022	1.2442e-05	0.00017327	2.9681
KCTD2	-0.34214	9.134	-4.8022	1.2443e-05	0.00017327	2.968
PCDH17	0.64218	7.1639	4.8023	1.2434e-05	0.00017327	2.9687
TYMP	0.67463	7.8924	4.8001	1.2532e-05	0.00017406	2.9612
ORC6L	0.29277	5.2046	4.8	1.2537e-05	0.00017406	2.9608
SUCLA2	-0.34081	9.6604	-4.7996	1.2557e-05	0.00017408	2.9593
C16orf88	0.29795	6.6887	4.799	1.2582e-05	0.00017417	2.9574
PAPSS1	-0.32095	11.274	-4.7948	1.277e-05	0.00017651	2.9431
USP9X	-0.28655	9.9546	-4.7939	1.2811e-05	0.0001768	2.9401
RBP1	0.53992	7.735	4.7902	1.2976e-05	0.00017837	2.9278
ZNF189	-0.66824	9.3181	-4.7901	1.2983e-05	0.00017837	2.9274
HSPA4L	-0.46768	5.9991	-4.7909	1.2944e-05	0.00017837	2.9302
PPP2R3A	-0.29242	7.7645	-4.7887	1.3045e-05	0.00017897	2.9228
PSTPIP2	0.40848	5.1441	4.7875	1.3101e-05	0.00017919	2.9187
P2RY13	0.80134	6.1004	4.7876	1.3094e-05	0.00017919	2.9192
MGAM	-1.1659	7.6246	-4.7848	1.3228e-05	0.00018066	2.9095
ACE2	-1.125	7.5921	-4.779	1.3497e-05	0.00018406	2.8902
TUBB6	0.38326	10.37	4.7779	1.3551e-05	0.00018453	2.8864
LAT2	0.64625	6.9467	4.7729	1.3791e-05	0.00018752	2.8696
SLC11A2	-0.28806	8.1102	-4.7724	1.3814e-05	0.00018756	2.868
ALDOB	-1.0477	12.548	-4.7692	1.3971e-05	0.00018924	2.8572
DPEP2	0.58333	6.8283	4.769	1.3979e-05	0.00018924	2.8566
ATF3	-1.3802	8.9065	-4.7683	1.4016e-05	0.00018947	2.8541
TASP1	-0.35384	8.7118	-4.7669	1.4085e-05	0.00019011	2.8494
FAM102A	-0.36571	7.8214	-4.7647	1.4195e-05	0.00019132	2.842
FBXO34	-0.29782	9.4134	-4.7614	1.4356e-05	0.00019321	2.8312
SPTB	-0.34164	7.573	-4.7606	1.4396e-05	0.00019347	2.8285
MRAS	0.48257	6.9303	4.7592	1.4468e-05	0.00019415	2.8237
GTF2H4	0.47052	6.0991	4.7567	1.4597e-05	0.00019559	2.8153
MFGE8	0.55434	6.7872	4.7528	1.4795e-05	0.00019796	2.8024
GSTM4	-0.33044	6.2343	-4.7519	1.4846e-05	0.00019836	2.7991
FDPS	0.46862	9.4279	4.7512	1.4878e-05	0.00019846	2.797
MYO1F	0.73861	7.8973	4.7509	1.4897e-05	0.00019846	2.7958
RGL2	0.32877	9.293	4.7464	1.5133e-05	0.00020132	2.7808
PDK4	-0.86061	7.9212	-4.7445	1.5234e-05	0.00020237	2.7744
CEBPD	-0.69107	10.011	-4.7416	1.5389e-05	0.00020384	2.7647
CCDC69	0.47967	5.4949	4.7418	1.5377e-05	0.00020384	2.7655
AURKA	0.4816	6.1353	4.7407	1.5437e-05	0.00020419	2.7617
PKLR	-0.45787	6.3394	-4.7391	1.5525e-05	0.00020504	2.7563
KCNE2	-0.29482	5.8118	-4.7386	1.5554e-05	0.00020514	2.7545
LYZ	1.5352	8.8427	4.7353	1.5731e-05	0.00020718	2.7437
TREH	-0.91957	5.8641	-4.732	1.5914e-05	0.00020928	2.7327
KDM3B	-0.31036	9.5174	-4.7269	1.6202e-05	0.00021278	2.7155
KLF15	-0.37445	7.8325	-4.7264	1.6233e-05	0.00021287	2.7137
PLCE1	-0.54794	10.669	-4.7257	1.6268e-05	0.00021304	2.7116
PISD	-0.34531	8.8358	-4.7239	1.637e-05	0.00021406	2.7056
GNB2	0.29588	9.6309	4.7225	1.6452e-05	0.00021424	2.7008
SLC22A6	-1.2082	8.1783	-4.7229	1.6432e-05	0.00021424	2.702
TULP4	-0.43608	8.1106	-4.7217	1.65e-05	0.00021424	2.6981
PCIF1	-0.28082	7.9219	-4.7221	1.6476e-05	0.00021424	2.6994
C1orf21	-0.68489	8.6802	-4.7224	1.6459e-05	0.00021424	2.7004
NR4A3	-0.49105	5.6169	-4.7203	1.6582e-05	0.000215	2.6934
MT1E	-0.50484	10.933	-4.7184	1.6688e-05	0.00021607	2.6873
LMAN2	0.2975	8.9433	4.7178	1.6726e-05	0.00021627	2.6851
CD86	0.48296	5.5563	4.7162	1.6819e-05	0.00021699	2.6798
SPSB1	-0.54921	7.2996	-4.716	1.6829e-05	0.00021699	2.6792
SLC1A1	-0.60798	7.2616	-4.7139	1.6953e-05	0.00021829	2.6722
CDKN2C	0.49047	7.1159	4.7121	1.7062e-05	0.00021938	2.6661
ACY1	-1.0779	10.666	-4.7112	1.7116e-05	0.00021976	2.6631
ACAT1	-0.6571	11.711	-4.7103	1.717e-05	0.00021988	2.66
SLC34A1	-0.98751	8.5337	-4.7102	1.7173e-05	0.00021988	2.6599
ACBD4	-0.3064	7.6863	-4.7095	1.7217e-05	0.00022014	2.6574
C1orf54	0.51514	9.7108	4.7036	1.7576e-05	0.00022443	2.6377
PPP1CA	0.45634	9.6568	4.6974	1.7959e-05	0.000229	2.6171
PEX19	-0.26988	9.266	-4.6952	1.8099e-05	0.00023046	2.6097
SLC2A5	-0.53981	7.2623	-4.6899	1.8437e-05	0.00023444	2.592
RNF34	0.277	9.4095	4.6873	1.8603e-05	0.00023623	2.5834
ZNF35	0.26302	7.0693	4.6809	1.9022e-05	0.00024121	2.5621
PEPD	-0.64101	10.955	-4.6802	1.9069e-05	0.00024148	2.5597
FECH	-0.2393	8.407	-4.679	1.9151e-05	0.00024219	2.5557
ITGAL	0.39906	5.3488	4.6778	1.9229e-05	0.00024284	2.5518
EEF1D	0.35049	11.775	4.6773	1.9267e-05	0.00024298	2.5499
UTP14A	0.35363	6.8973	4.6743	1.9465e-05	0.00024515	2.5401
MAGI2	-0.45497	8.5699	-4.6709	1.9698e-05	0.00024774	2.5288
SLC25A1	-0.35886	9.3508	-4.6697	1.9779e-05	0.00024842	2.5249
FBXL5	-0.22545	10.55	-4.6677	1.9921e-05	0.00024987	2.518
CDO1	0.58786	6.4724	4.6659	2.0047e-05	0.00025111	2.512
CD68	0.52379	5.0643	4.6633	2.0227e-05	0.00025267	2.5034
PSRC1	0.27816	5.9843	4.6636	2.0206e-05	0.00025267	2.5044
APOBEC3G	0.59479	8.1241	4.6622	2.0304e-05	0.00025329	2.4998
GSK3B	0.39198	6.4426	4.6607	2.0409e-05	0.00025426	2.4949
CXorf57	-0.45773	6.7021	-4.6601	2.0454e-05	0.00025447	2.4928
TLE3	0.28678	4.9989	4.6587	2.0553e-05	0.00025536	2.4882
BHMT2	-1.0725	9.7432	-4.6578	2.0621e-05	0.00025552	2.485
FAM134B	-0.49693	10.688	-4.6581	2.0598e-05	0.00025552	2.4861
SMU1	0.34246	6.4322	4.655	2.0818e-05	0.00025761	2.4759
SEC22A	0.34285	6.5021	4.6546	2.0852e-05	0.00025769	2.4744
EMG1	0.27667	9.2715	4.6536	2.092e-05	0.00025819	2.4712
USP2	-0.43584	5.8798	-4.6531	2.0955e-05	0.00025827	2.4696
SDC1	-1.0017	8.3467	-4.6517	2.1064e-05	0.00025892	2.4647
MCTS1	0.2638	9.9305	4.6517	2.1057e-05	0.00025892	2.465
CHPF2	0.30942	8.0817	4.649	2.1257e-05	0.00026094	2.456
SP140L	0.49015	7.5511	4.6464	2.1452e-05	0.00026299	2.4473
DCXR	-0.81021	10.522	-4.6454	2.1524e-05	0.00026352	2.4441
RPS19	0.36232	12.984	4.6428	2.172e-05	0.00026557	2.4354
MYRIP	-0.49799	6.3847	-4.6417	2.1806e-05	0.00026627	2.4316
HOMER3	0.39817	6.6323	4.6325	2.2512e-05	0.00027452	2.4012
OSGEP	0.422	7.4106	4.63	2.271e-05	0.00027657	2.3928
EZH2	0.43242	4.8078	4.6296	2.2741e-05	0.00027658	2.3915
BFSP1	0.41928	6.6302	4.6252	2.3094e-05	0.00028014	2.3768
IGF1	-1.049	8.3948	-4.6255	2.3067e-05	0.00028014	2.3779
OAT	-0.27744	11.122	-4.6226	2.33e-05	0.00028226	2.3684
CLINT1	-0.26083	9.2284	-4.6219	2.336e-05	0.00028262	2.3659
MT3	-0.43777	5.561	-4.6214	2.3402e-05	0.00028275	2.3642
ADH6	-0.5324	5.9133	-4.62	2.3515e-05	0.00028331	2.3596
PLAGL2	-0.27679	6.9991	-4.6197	2.354e-05	0.00028331	2.3586
MED28	0.3727	7.3782	4.6198	2.3531e-05	0.00028331	2.359
NEBL	-0.32581	8.7446	-4.6188	2.3611e-05	0.00028379	2.3557
DNM1L	0.36699	7.2776	4.6134	2.4059e-05	0.00028881	2.3377
PITPNA	0.19395	9.5027	4.6088	2.4442e-05	0.00029302	2.3227
FBXO7	-0.25734	10.985	-4.6055	2.4721e-05	0.00029598	2.3118
TSPYL5	-0.36945	9.617	-4.6022	2.5012e-05	0.00029907	2.3007
VSIG4	1.2072	7.553	4.6004	2.5162e-05	0.00030048	2.295
KL	-0.87859	9.0868	-4.5983	2.5353e-05	0.00030237	2.2877
FOLH1B	-0.78257	6.3066	-4.5941	2.5725e-05	0.00030641	2.2738
LPL	-0.94161	9.1799	-4.5924	2.587e-05	0.00030773	2.2685
C19orf60	0.39507	8.3099	4.5918	2.5922e-05	0.00030796	2.2665
ARMC9	0.29399	5.5476	4.5907	2.6024e-05	0.00030877	2.2628
HPN	-0.85031	8.2962	-4.5892	2.616e-05	0.00030998	2.2578
PNMA2	-0.28033	8.7263	-4.5887	2.6203e-05	0.0003101	2.2563
SLC7A9	-1.307	10.139	-4.5865	2.6405e-05	0.00031209	2.2489
TRAPPC2	0.378	7.4064	4.5857	2.6478e-05	0.00031255	2.2463
PLG	-1.4944	9.3546	-4.5849	2.6551e-05	0.00031301	2.2437
GUK1	0.3113	10.514	4.5837	2.666e-05	0.00031389	2.2398
CD79B	0.41246	6.6897	4.5827	2.6757e-05	0.00031463	2.2363
P4HA1	-0.42743	9.6343	-4.5822	2.6798e-05	0.00031471	2.2348
ADH5	-0.22533	11.275	-4.5809	2.692e-05	0.00031575	2.2305
ACTR1A	0.22306	9.2373	4.5805	2.696e-05	0.00031581	2.2291
MARCKS	0.53825	6.3381	4.5754	2.7441e-05	0.00032063	2.2122
FHL5	0.46067	5.5477	4.5756	2.7418e-05	0.00032063	2.213
KLHL3	-0.46894	9.0608	-4.5747	2.751e-05	0.00032063	2.2098
TRIM9	0.3624	5.2197	4.5749	2.7488e-05	0.00032063	2.2106
HNRNPAB	0.33574	10.873	4.5736	2.7611e-05	0.00032119	2.2063
RGS19	0.3879	8.0676	4.5734	2.7628e-05	0.00032119	2.2057
NRGN	0.4507	7.9396	4.5717	2.7797e-05	0.00032274	2.1999
SNX27	-0.27062	7.767	-4.5698	2.7978e-05	0.00032444	2.1937
MYO5C	-0.40908	10.256	-4.5687	2.8085e-05	0.00032527	2.1901
PPP1R13B	0.42751	6.8672	4.5672	2.823e-05	0.00032654	2.1852
TM4SF5	-0.55352	8.0359	-4.5627	2.8669e-05	0.0003312	2.1705
MGLL	0.68526	8.6577	4.5616	2.8779e-05	0.00033193	2.1668
PIPOX	-0.98089	9.5215	-4.5614	2.8804e-05	0.00033193	2.166
HDDC2	-0.30987	8.4109	-4.5602	2.8923e-05	0.00033289	2.162
ARHGAP25	0.39808	7.8288	4.5586	2.9077e-05	0.00033417	2.157
ATP8A2	0.55834	7.37	4.5583	2.9107e-05	0.00033417	2.156
MYT1	-0.17976	6.0609	-4.5575	2.9188e-05	0.00033469	2.1533
TIMP1	0.61487	11.53	4.5562	2.932e-05	0.00033578	2.149
FUT6	-0.3801	6.4936	-4.5532	2.9629e-05	0.00033889	2.139
KCNK5	-0.80792	7.1799	-4.5504	2.9912e-05	0.00034171	2.13
APBB1IP	0.37646	5.7627	4.5497	2.9989e-05	0.00034216	2.1275
PRKACB	-0.31934	9.1566	-4.5482	3.0145e-05	0.00034352	2.1226
MARCO	0.89856	6.2881	4.5453	3.0446e-05	0.00034652	2.1131
RHOBTB1	0.45501	8.5282	4.5444	3.0536e-05	0.00034712	2.1103
PCMTD2	-0.42499	10.547	-4.5428	3.0712e-05	0.00034869	2.1048
ACTN1	0.62295	7.0268	4.5413	3.0872e-05	0.00035007	2.0998
SH3YL1	-0.68037	10.1	-4.5399	3.1014e-05	0.00035125	2.0955
SLC10A2	-0.87199	7.3007	-4.539	3.1109e-05	0.00035189	2.0925
CLEC10A	0.5444	5.7394	4.5335	3.1708e-05	0.00035824	2.0743
PSMD13	0.33671	9.0282	4.5328	3.1788e-05	0.00035826	2.0719
DCHS1	0.37998	7.2201	4.5331	3.1753e-05	0.00035826	2.073
ALDH4A1	-0.76349	8.9003	-4.5288	3.2226e-05	0.00036275	2.0589
NARF	0.35829	8.3903	4.528	3.2316e-05	0.00036331	2.0562
MEIS2	0.66352	10.656	4.5269	3.2437e-05	0.00036423	2.0527
HSDL2	-0.33376	8.9312	-4.5251	3.2645e-05	0.00036613	2.0466
MMP28	-0.4449	6.7836	-4.523	3.2871e-05	0.00036821	2.04
MGAT1	0.24135	10.159	4.5219	3.2997e-05	0.00036873	2.0363
CNPY3	0.26548	7.7236	4.522	3.2985e-05	0.00036873	2.0367
CHMP2A	0.31236	10.077	4.5207	3.3134e-05	0.00036936	2.0324
MRPL17	0.28029	9.2489	4.5208	3.3127e-05	0.00036936	2.0326
NUDT1	0.43092	6.6507	4.5191	3.3326e-05	0.00037105	2.0269
CASP3	0.48589	7.6503	4.5175	3.3504e-05	0.00037213	2.0218
MRTO4	0.45095	6.5095	4.5176	3.349e-05	0.00037213	2.0222
AMT	-0.49205	9.0459	-4.5143	3.3876e-05	0.00037582	2.0113
HTATIP2	0.39688	9.4646	4.5132	3.3999e-05	0.00037673	2.0078
QDPR	-0.4254	11.442	-4.5119	3.4153e-05	0.00037798	2.0035
RNF7	0.31623	9.5025	4.5114	3.4218e-05	0.00037824	2.0017
BCAM	-0.36916	9.1594	-4.5106	3.4312e-05	0.00037867	1.9991
B4GALT5	0.30034	9.0554	4.51	3.438e-05	0.00037867	1.9972
RNF144A	0.39326	8.619	4.5101	3.4366e-05	0.00037867	1.9976
HSPA9	-0.29702	9.5322	-4.5075	3.4679e-05	0.00038126	1.9889
PCK2	-0.91905	9.7951	-4.5073	3.4697e-05	0.00038126	1.9884
SLC22A4	-0.49164	7.2322	-4.5059	3.4873e-05	0.00038274	1.9836
DPP6	-0.75061	10.998	-4.505	3.4979e-05	0.00038298	1.9807
GOLGB1	-0.26846	10.743	-4.5051	3.497e-05	0.00038298	1.981
NECAB3	-0.34529	7.1878	-4.504	3.5101e-05	0.00038386	1.9774
RFC1	-0.27235	9.7871	-4.5022	3.5316e-05	0.00038401	1.9716
SHC1	0.2564	8.9326	4.5025	3.5277e-05	0.00038401	1.9727
WDR1	0.22298	10.343	4.5035	3.5161e-05	0.00038401	1.9758
FXYD6	0.6137	10.237	4.5027	3.5251e-05	0.00038401	1.9734
UGT2A3	-0.85831	6.787	-4.5021	3.5323e-05	0.00038401	1.9714
HEY1	0.6012	9.242	4.501	3.5455e-05	0.000385	1.9678
BNIP1	0.23129	6.5371	4.4995	3.5649e-05	0.00038625	1.9626
LOX	-0.47365	6.9529	-4.4991	3.5696e-05	0.00038625	1.9614
MATR3	-0.38905	9.6248	-4.4991	3.5695e-05	0.00038625	1.9614
PRKCH	0.54713	9.1735	4.4985	3.5764e-05	0.0003864	1.9596
ADAP2	0.5329	7.0165	4.4983	3.5794e-05	0.0003864	1.9588
PSENEN	0.26172	8.8937	4.4949	3.6205e-05	0.00039038	1.9479
PIGC	0.26097	10.214	4.4931	3.6431e-05	0.00039235	1.942
C8orf41	0.24969	7.8603	4.4927	3.648e-05	0.00039242	1.9407
SASH3	0.51295	6.8163	4.4915	3.6631e-05	0.00039359	1.9368
YES1	-0.37114	9.2191	-4.4871	3.7194e-05	0.00039917	1.9222
GZMB	0.79373	6.6674	4.4863	3.7301e-05	0.00039986	1.9195
GNAI1	0.56371	8.0548	4.4849	3.7482e-05	0.00040133	1.9149
OAS2	0.63685	7.6968	4.4827	3.7763e-05	0.00040387	1.9077
NRBF2	0.57401	6.3761	4.4809	3.7987e-05	0.0004058	1.9021
ZDHHC3	0.20803	8.4992	4.48	3.8107e-05	0.0004066	1.8991
MAOA	-0.59478	9.4483	-4.4796	3.8168e-05	0.00040679	1.8976
SENP2	-0.2662	7.7065	-4.4784	3.8319e-05	0.00040792	1.8938
SALL2	-0.36527	9.5119	-4.4775	3.844e-05	0.00040874	1.8908
ACAA1	-0.53101	9.6251	-4.4769	3.852e-05	0.00040912	1.8888
PRKCB	0.53247	6.0303	4.4747	3.8816e-05	0.00041178	1.8816
CYP4F2	-1.1613	8.4292	-4.4739	3.8917e-05	0.00041191	1.8791
C2orf47	-0.27353	9.6316	-4.4742	3.8881e-05	0.00041191	1.88
CTSS	0.91113	7.3056	4.4723	3.9125e-05	0.00041364	1.874
BDNF	0.27625	4.8364	4.4719	3.9186e-05	0.00041381	1.8725
CHGB	-0.64278	6.1331	-4.4713	3.9264e-05	0.00041416	1.8706
ASS1	-0.66408	12.651	-4.4677	3.9748e-05	0.00041878	1.8589
ZP2	-0.27254	5.443	-4.4664	3.9923e-05	0.00042015	1.8547
BCAT1	0.29439	4.9765	4.466	3.9988e-05	0.00042035	1.8532
SEPW1	0.32899	11.263	4.4644	4.0211e-05	0.00042221	1.8479
TAF2	-0.24888	8.8463	-4.4627	4.0443e-05	0.00042417	1.8424
PTEN	0.41873	7.0275	4.4608	4.0707e-05	0.00042645	1.8362
PAK1IP1	0.4627	5.8009	4.4575	4.1168e-05	0.00043079	1.8255
PILRA	0.48335	6.0161	4.4556	4.1432e-05	0.00043307	1.8194
HLA-DPB1	0.48767	12.43	4.454	4.1656e-05	0.00043393	1.8143
PRLR	-0.21525	4.882	-4.4541	4.1642e-05	0.00043393	1.8146
TCF15	0.3743	5.5322	4.4541	4.1653e-05	0.00043393	1.8143
BST1	-0.52322	8.0901	-4.4505	4.2161e-05	0.00043869	1.8028
ELF4	0.33838	8.2213	4.4482	4.2497e-05	0.00044169	1.7952
MAPK12	0.31414	6.1755	4.4412	4.3522e-05	0.00045111	1.7725
TRDC	0.30067	6.0416	4.441	4.355e-05	0.00045111	1.7719
FKBP14	0.36476	5.963	4.4417	4.3456e-05	0.00045111	1.774
PFTK1	-0.22208	7.4261	-4.4369	4.417e-05	0.00045686	1.7585
TP53	0.26964	5.7545	4.4363	4.4253e-05	0.00045686	1.7567
AMMECR1	0.48498	6.8264	4.4366	4.4222e-05	0.00045686	1.7574
LOXL2	0.26427	6.2083	4.4335	4.4684e-05	0.00046027	1.7475
VIL1	-0.61124	6.6466	-4.4336	4.4673e-05	0.00046027	1.7477
DDX25	-0.41321	5.9319	-4.4324	4.4847e-05	0.00046143	1.744
PTCD3	-0.26213	8.4399	-4.4311	4.505e-05	0.000463	1.7397
GLT25D1	0.25523	7.8584	4.4305	4.5151e-05	0.00046352	1.7376
HMGCS2	-1.09	8.0601	-4.43	4.5228e-05	0.00046363	1.7359
C21orf33	-0.45604	8.7892	-4.4298	4.5262e-05	0.00046363	1.7352
UBAP1	-0.16855	9.3555	-4.426	4.5838e-05	0.00046902	1.7232
CCT7	0.19981	11.126	4.425	4.6004e-05	0.00047019	1.7197
ENG	0.4514	9.0581	4.4217	4.6526e-05	0.000475	1.709
SLFN12	0.36518	6.2577	4.4201	4.6771e-05	0.00047697	1.704
ANXA11	0.19397	9.1228	4.4187	4.7002e-05	0.00047862	1.6993
ACSM5	-0.44052	7.026	-4.4185	4.7037e-05	0.00047862	1.6986
TFF1	-0.27504	5.2134	-4.4175	4.7189e-05	0.00047965	1.6955
CD44	0.63346	6.8544	4.4165	4.7361e-05	0.00048086	1.6921
NADK	0.23111	6.7801	4.4159	4.7459e-05	0.00048132	1.6901
PTRF	0.2653	8.412	4.4135	4.7841e-05	0.00048467	1.6824
TFRC	-0.63314	9.086	-4.4131	4.7913e-05	0.00048486	1.681
PSMA7	0.37602	9.9594	4.4114	4.8181e-05	0.00048526	1.6757
PDZK1IP1	-0.52988	12.373	-4.4112	4.8222e-05	0.00048526	1.6749
PSIP1	-0.29108	9.2434	-4.4109	4.8268e-05	0.00048526	1.674
EHBP1	-0.25664	9.4908	-4.4121	4.8079e-05	0.00048526	1.6777
C7orf68	-0.37521	8.6666	-4.4115	4.817e-05	0.00048526	1.6759
AZGP1P1	-0.28981	7.6192	-4.4122	4.8047e-05	0.00048526	1.6784
ID3	0.52198	10.181	4.4094	4.8516e-05	0.00048722	1.6691
TRIOBP	0.29696	9.329	4.4056	4.9152e-05	0.00049234	1.6567
RHBDD3	0.31852	7.2078	4.4058	4.9119e-05	0.00049234	1.6574
NTM	0.27013	5.2623	4.4054	4.9185e-05	0.00049234	1.6561
KDR	0.7667	10.405	4.4037	4.9466e-05	0.00049461	1.6507
IFI27	0.64855	11.089	4.4032	4.9552e-05	0.00049493	1.649
IKBKB	0.29046	6.8171	4.4015	4.9847e-05	0.00049733	1.6434
OVOL1	-0.32688	6.9048	-4.3981	5.0421e-05	0.00050198	1.6325
PSME2	0.41233	10.23	4.3983	5.0381e-05	0.00050198	1.6332
MCCC1	-0.40076	8.8398	-4.3962	5.0747e-05	0.00050467	1.6263
STX7	-0.28887	8.9383	-4.3917	5.1538e-05	0.00051199	1.6116
NOTCH2	-0.26301	9.2927	-4.3908	5.1683e-05	0.00051288	1.6089
HLA-F	0.34107	12.511	4.3892	5.1964e-05	0.00051512	1.6038
DRP2	-0.42241	6.1605	-4.3865	5.2452e-05	0.00051934	1.5949
F8	0.6132	9.9988	4.3859	5.2559e-05	0.00051934	1.5929
KNG1	-1.4617	9.185	-4.3861	5.2526e-05	0.00051934	1.5935
KBTBD11	-0.59127	10.118	-4.3801	5.3611e-05	0.00052916	1.5741
ACOX2	-0.53914	9.355	-4.3788	5.3847e-05	0.00053093	1.5699
DAK	-0.43765	6.2749	-4.3768	5.4208e-05	0.00053391	1.5636
LAGE3	0.25806	8.6605	4.3755	5.4456e-05	0.00053578	1.5592
CCND1	0.50607	8.2824	4.3716	5.517e-05	0.00054109	1.5468
SLC39A14	-0.47483	10.164	-4.3716	5.5171e-05	0.00054109	1.5468
CUEDC2	0.2864	10.233	4.372	5.5104e-05	0.00054109	1.548
KIAA0355	0.50784	10.225	4.3688	5.571e-05	0.00054579	1.5376
ANO1	0.31272	4.9096	4.3678	5.5888e-05	0.00054696	1.5345
ZNF259	0.3178	7.1394	4.3663	5.6171e-05	0.00054915	1.5297
MTHFD2L	-0.32325	6.7733	-4.3653	5.6366e-05	0.00055047	1.5264
DPEP1	-1.0797	9.1834	-4.3647	5.649e-05	0.00055109	1.5243
PSMC2	0.27238	11.928	4.3628	5.6844e-05	0.00055395	1.5184
FXR2	-0.24019	8.2568	-4.3595	5.7478e-05	0.00055837	1.5078
GPR172A	0.26331	7.6209	4.3598	5.7424e-05	0.00055837	1.5087
MT4	-0.41391	9.725	-4.3598	5.742e-05	0.00055837	1.5088
IL2RB	0.31921	7.5462	4.3574	5.7906e-05	0.00056141	1.5008
RNFT1	0.20517	5.0592	4.3573	5.7913e-05	0.00056141	1.5007
KDELC1	0.54402	7.0585	4.3554	5.8286e-05	0.00056443	1.4946
CSE1L	0.213	9.3314	4.3523	5.8908e-05	0.00056986	1.4845
SPI1	0.24927	5.4063	4.3519	5.8981e-05	0.00056997	1.4833
CD3D	0.41541	5.9678	4.3487	5.9625e-05	0.00057499	1.473
TBCB	0.21307	11.212	4.3488	5.9611e-05	0.00057499	1.4732
LEPRE1	0.38144	8.3237	4.3463	6.0111e-05	0.00057814	1.4652
IQCH	-0.26859	4.9748	-4.3464	6.0094e-05	0.00057814	1.4655
EML3	0.22476	7.579	4.3462	6.0141e-05	0.00057814	1.4648
APOC3	-0.68593	5.9201	-4.3449	6.0406e-05	0.00058009	1.4606
GABPB1	0.24566	6.6979	4.3434	6.0702e-05	0.00058233	1.4559
FAM184A	-0.30095	6.6338	-4.3371	6.2014e-05	0.00059429	1.4356
LOC729518	0.43435	7.7363	4.3364	6.2168e-05	0.00059515	1.4333
PARD6B	-0.15989	4.9039	-4.3331	6.2877e-05	0.00060131	1.4225
DCK	0.41507	6.8823	4.3324	6.3022e-05	0.00060207	1.4203
DOK1	0.2252	7.2859	4.3312	6.3274e-05	0.00060335	1.4165
WT1	-0.35595	10.874	-4.3308	6.3352e-05	0.00060335	1.4153
GHITM	-0.2418	11.868	-4.3311	6.3297e-05	0.00060335	1.4161
CCR1	0.70914	6.7803	4.3303	6.347e-05	0.00060385	1.4135
PITPNM1	0.32595	7.0556	4.3263	6.4333e-05	0.00061017	1.4007
ISG15	1.0811	9.2406	4.3266	6.4273e-05	0.00061017	1.4016
RAI14	-0.313	10.896	-4.3268	6.4216e-05	0.00061017	1.4024
SPATS2	0.25771	6.089	4.3242	6.4784e-05	0.00061382	1.3941
MATK	0.42738	6.5482	4.323	6.5051e-05	0.00061572	1.3902
FAM89B	0.26398	9.0372	4.3191	6.5912e-05	0.00062322	1.3777
AQP6	-0.21023	6.3595	-4.3173	6.6318e-05	0.00062539	1.3718
ECM1	1.2388	9.8326	4.3171	6.6374e-05	0.00062539	1.371
NUPR1	-0.57744	9.2143	-4.3177	6.6229e-05	0.00062539	1.3731
CRYL1	-0.62918	10.545	-4.3169	6.6412e-05	0.00062539	1.3705
MUC13	-0.64894	6.1182	-4.3153	6.6774e-05	0.00062815	1.3653
LY6G5C	0.27954	6.3161	4.3149	6.6853e-05	0.00062826	1.3642
GRPR	-0.38314	7.5532	-4.3145	6.6944e-05	0.00062847	1.3629
RDX	-0.34222	8.7588	-4.3138	6.711e-05	0.00062939	1.3605
H2AFZ	0.30213	11.47	4.3123	6.7457e-05	0.00063157	1.3556
CXCR4	0.87915	8.2614	4.3122	6.748e-05	0.00063157	1.3553
CCBL1	-0.46169	9.4979	-4.3114	6.7653e-05	0.00063255	1.3529
VAC14	-0.29657	7.3868	-4.3106	6.7832e-05	0.00063358	1.3504
ALAD	-0.30745	7.2918	-4.3098	6.8018e-05	0.00063433	1.3478
FCGR2B	0.64593	5.6794	4.3097	6.8049e-05	0.00063433	1.3473
TMEM22	0.48524	7.7045	4.3077	6.8514e-05	0.00063737	1.3409
FAM172A	-0.40894	8.1948	-4.3078	6.8491e-05	0.00063737	1.3412
LY86	0.5234	7.9989	4.3052	6.9081e-05	0.00064199	1.333
CXCL14	-1.2311	10.8	-4.3028	6.9656e-05	0.00064668	1.3252
DIO1	-1.3185	8.9502	-4.3007	7.0137e-05	0.00065049	1.3186
CASP7	0.3117	8.9062	4.2991	7.0528e-05	0.00065346	1.3133
PPM1F	0.40802	10.134	4.2985	7.0674e-05	0.00065416	1.3114
ASGR1	0.25302	5.0742	4.2966	7.1129e-05	0.00065771	1.3053
PIP5K1A	-0.2491	7.8826	-4.2962	7.1213e-05	0.00065783	1.3042
ADRB2	0.5206	5.9908	4.2954	7.1395e-05	0.00065885	1.3017
CES2	-0.48824	8.9164	-4.2948	7.1552e-05	0.00065964	1.2996
ST8SIA4	0.28976	4.9693	4.294	7.1756e-05	0.00066086	1.2969
F11	-0.35379	6.5045	-4.2925	7.212e-05	0.00066312	1.2921
ABCC10	0.35227	8.1821	4.2923	7.2146e-05	0.00066312	1.2918
ZDHHC18	0.25949	7.5372	4.2906	7.258e-05	0.00066644	1.2861
SLC2A6	0.26041	5.7044	4.2902	7.2675e-05	0.00066665	1.2849
GIMAP6	0.65974	10.154	4.2884	7.3113e-05	0.00067001	1.2791
ACO1	-0.53302	10.125	-4.288	7.3212e-05	0.00067025	1.2779
DDX41	0.27822	9.3321	4.2874	7.3348e-05	0.00067083	1.2761
VPS13D	-0.22334	8.7046	-4.2834	7.4354e-05	0.00067869	1.2631
LOC727722	-0.82614	8.5987	-4.2835	7.4333e-05	0.00067869	1.2634
SIL1	0.36727	9.1359	4.2792	7.5414e-05	0.00068767	1.2497
ACADL	-0.62154	6.441	-4.2783	7.5636e-05	0.00068834	1.2469
GLIPR1	0.96847	6.367	4.2784	7.5629e-05	0.00068834	1.247
ATP6V1G2	-0.35696	6.223	-4.2759	7.6259e-05	0.00069333	1.2391
SSR2	0.23757	10.852	4.2743	7.6658e-05	0.00069627	1.2342
KRCC1	-0.33695	10.036	-4.2727	7.7068e-05	0.00069928	1.2291
C12orf44	0.37869	8.9316	4.2725	7.7141e-05	0.00069928	1.2282
TACC2	-0.36085	9.5061	-4.2707	7.7606e-05	0.0007028	1.2225
BZW2	0.3879	8.8942	4.2699	7.7802e-05	0.00070388	1.2201
CPNE6	-0.67256	6.0393	-4.2696	7.7901e-05	0.00070409	1.2189
KIAA0564	-0.29949	7.6615	-4.2679	7.8342e-05	0.00070738	1.2135
MMRN2	0.52007	7.7734	4.2672	7.8526e-05	0.00070834	1.2113
MYBPC3	-0.29298	7.4172	-4.2668	7.8626e-05	0.00070856	1.2101
AKR1B1	0.27721	11.136	4.2657	7.8927e-05	0.00071	1.2065
GSDMD	0.34482	8.8584	4.2656	7.894e-05	0.00071	1.2063
CD40	0.26288	7.455	4.2648	7.9169e-05	0.00071067	1.2036
BTN3A3	0.64017	7.59	4.2649	7.9142e-05	0.00071067	1.2039
GNA15	0.44963	5.3711	4.2641	7.9342e-05	0.00071084	1.2015
MFSD10	0.51922	7.6545	4.2642	7.9312e-05	0.00071084	1.2018
SF4	0.36176	7.8781	4.2627	7.9708e-05	0.00071342	1.1971
TLE2	0.41547	7.303	4.2622	7.9846e-05	0.0007137	1.1955
C19orf50	0.2279	8.7566	4.262	7.9894e-05	0.0007137	1.1949
DLGAP2	-0.19202	5.1869	-4.2607	8.0246e-05	0.00071616	1.1907
UBOX5	-0.25158	7.7634	-4.2583	8.0911e-05	0.00072139	1.1829
SHMT1	-0.84486	8.4898	-4.2574	8.1158e-05	0.00072289	1.18
PRCP	0.32044	11.93	4.2516	8.2742e-05	0.00073629	1.1616
C12orf4	0.3073	6.3838	4.2513	8.2833e-05	0.00073639	1.1606
SLC17A3	-1.1714	9.7792	-4.2509	8.293e-05	0.00073654	1.1595
PHKA2	-0.23671	7.8361	-4.2503	8.3103e-05	0.00073737	1.1575
BAZ1A	0.42867	5.9544	4.2495	8.3339e-05	0.00073875	1.1548
OXSR1	-0.41875	8.8484	-4.2487	8.356e-05	0.00074	1.1523
CECR1	0.69192	10.051	4.247	8.4035e-05	0.00074349	1.1469
GIPC2	-0.71893	7.0847	-4.2464	8.4198e-05	0.00074422	1.1451
CD34	0.57118	9.6815	4.2461	8.4302e-05	0.00074443	1.1439
HBE1	-0.29681	5.8475	-4.2438	8.4937e-05	0.00074932	1.1368
FBXW2	0.30445	7.8446	4.2426	8.5279e-05	0.00075162	1.133
ODAM	-0.23845	4.878	-4.242	8.5461e-05	0.00075178	1.131
BDH2	-0.58234	9.786	-4.2422	8.5386e-05	0.00075178	1.1318
RANBP2	-0.24624	8.2562	-4.2408	8.5812e-05	0.00075415	1.1271
DGKZ	0.60693	9.2825	4.2403	8.5946e-05	0.00075461	1.1256
TBC1D8B	-0.37962	6.547	-4.2371	8.686e-05	0.00076191	1.1155
NDRG1	-0.31633	12.643	-4.2361	8.7157e-05	0.00076378	1.1123
TMEM132A	0.29638	6.6141	4.2357	8.7269e-05	0.00076404	1.1111
CA9	-0.34548	6.8684	-4.234	8.7767e-05	0.00076747	1.1057
SLC5A2	-0.6768	8.5867	-4.2338	8.7827e-05	0.00076747	1.105
CYP3A43	-0.23388	4.8837	-4.2332	8.8024e-05	0.00076846	1.1029
RCN1	0.38867	9.8838	4.2322	8.8314e-05	0.00077026	1.0998
RCBTB2	0.30336	9.6437	4.2312	8.8622e-05	0.00077222	1.0965
PROS1	0.35557	9.0655	4.2308	8.8731e-05	0.00077244	1.0953
ETV2	0.22226	5.0302	4.23	8.8954e-05	0.00077365	1.0929
GCDH	-0.33164	7.6641	-4.2275	8.9707e-05	0.00077873	1.0849
POLR2D	0.34704	6.572	4.2276	8.9683e-05	0.00077873	1.0852
CST7	0.42887	7.3003	4.2262	9.0091e-05	0.00078133	1.0809
MAOB	-0.46373	11.225	-4.2259	9.0201e-05	0.00078154	1.0797
PRSS16	-0.39165	6.8042	-4.2246	9.0601e-05	0.00078354	1.0755
LRRC19	-0.96053	6.8809	-4.2247	9.0569e-05	0.00078354	1.0759
DOPEY1	-0.21046	7.4081	-4.2232	9.0999e-05	0.00078514	1.0714
TAS2R1	-0.29543	6.3719	-4.2231	9.1042e-05	0.00078514	1.0709
WWOX	-0.47213	6.961	-4.2232	9.1029e-05	0.00078514	1.0711
QPRT	-0.51081	9.2034	-4.2226	9.121e-05	0.00078585	1.0692
PCNP	-0.34787	11.758	-4.2185	9.2452e-05	0.00079581	1.0563
SP110	0.39542	7.5465	4.218	9.2623e-05	0.00079654	1.0546
USP11	-0.44367	10.157	-4.215	9.3532e-05	0.0008036	1.0453
TBC1D12	0.27306	7.5345	4.2139	9.3876e-05	0.00080448	1.0418
ZFPM2	-0.57498	7.755	-4.2143	9.3769e-05	0.00080448	1.0429
BIN2	0.34853	6.6471	4.2139	9.3895e-05	0.00080448	1.0416
CLCN5	-0.5055	7.1588	-4.2128	9.4253e-05	0.00080679	1.038
PGPEP1	-0.4027	7.6155	-4.2113	9.4709e-05	0.00080995	1.0335
OSBPL3	0.37836	6.4857	4.2098	9.5197e-05	0.00081337	1.0286
RNF38	-0.24575	10.482	-4.2089	9.549e-05	0.00081511	1.0257
PUM1	-0.21069	10.075	-4.2064	9.6264e-05	0.00082096	1.018
LOC441938	-0.3764	6.5163	-4.206	9.6407e-05	0.00082142	1.0166
MAN1B1	0.35933	8.6902	4.2052	9.6663e-05	0.00082284	1.0141
ATP5G3	-0.26408	11.188	-4.2048	9.6785e-05	0.00082312	1.0129
PC	-0.5494	10.223	-4.2041	9.7015e-05	0.00082431	1.0106
CALB1	-2.0725	8.811	-4.203	9.7376e-05	0.00082662	1.0071
LHPP	-0.31105	7.5697	-4.2021	9.7667e-05	0.00082833	1.0043
PRKCI	-0.37289	8.5605	-4.2009	9.8065e-05	0.00083088	1.0004
C20orf12	-0.27895	6.8864	-4.2006	9.8149e-05	0.00083088	0.99962
AGL	-0.39247	7.7263	-4.2002	9.8302e-05	0.00083142	0.99814
C3	1.3453	8.537	4.1994	9.854e-05	0.0008319	0.99584
DYNC2H1	-0.45778	6.9896	-4.1994	9.8558e-05	0.0008319	0.99567
TRPM6	-0.46055	6.1984	-4.1992	9.8629e-05	0.0008319	0.99499
C1orf38	0.64414	6.7775	4.1983	9.8934e-05	0.0008337	0.99206
TSR1	0.33408	6.4143	4.1979	9.9062e-05	0.00083402	0.99084
RNF130	0.21776	9.7524	4.1971	9.9325e-05	0.00083511	0.98832
SLC2A4RG	-0.46699	6.977	-4.1969	9.9372e-05	0.00083511	0.98787
EIF2AK1	-0.22465	10.891	-4.1962	9.9621e-05	0.00083643	0.9855
RUFY1	0.19727	9.5769	4.1945	0.00010019	0.00083992	0.98012
SIRPA	-0.3916	9.1721	-4.1944	0.00010022	0.00083992	0.97983
DCN	-0.40557	12.84	-4.1935	0.0001005	0.00084036	0.97715
EGR1	-1.044	8.8703	-4.1932	0.00010063	0.00084036	0.97592
IGSF6	0.76516	4.9864	4.1929	0.00010073	0.00084036	0.97504
SLC35A1	0.30988	9.8074	4.1931	0.00010065	0.00084036	0.97577
DAPK2	0.22834	6.4939	4.1931	0.00010064	0.00084036	0.9758
VPS13C	-0.41074	9.1742	-4.1917	0.00010111	0.00084276	0.97147
IFT20	0.34126	9.027	4.1897	0.00010179	0.00084767	0.9651
FAM105A	0.43374	5.2789	4.1856	0.00010321	0.00085874	0.95194
MECOM	1.0293	6.9939	4.185	0.00010341	0.00085961	0.95012
PGLYRP4	-0.41046	6.5446	-4.1809	0.00010485	0.00087081	0.937
PROZ	-0.59139	7.1716	-4.1798	0.00010522	0.00087312	0.93364
PRKCDBP	0.54888	8.1987	4.1795	0.00010532	0.00087313	0.93277
LONRF3	-0.31039	6.7234	-4.1783	0.00010573	0.00087576	0.92907
HOXC6	0.37821	9.1688	4.1766	0.00010635	0.00087974	0.92353
LIN37	0.56047	6.3836	4.1764	0.0001064	0.00087974	0.92307
PHF16	0.37378	7.5007	4.1756	0.0001067	0.00088141	0.92042
LMO4	0.30594	6.1801	4.1747	0.00010702	0.00088272	0.91756
CHST11	0.23017	5.6056	4.1746	0.00010705	0.00088272	0.91731
CTSL2	-1.0062	10.957	-4.1714	0.00010819	0.00089132	0.90727
S100A11	0.32393	10.032	4.1698	0.00010877	0.00089455	0.90215
C12orf11	0.43835	7.9109	4.1699	0.00010874	0.00089455	0.9025
APBA1	-0.28563	5.7223	-4.1681	0.00010939	0.00089803	0.89678
TPM4	0.43117	6.9213	4.1683	0.00010934	0.00089803	0.89721
NDN	-0.28984	10.997	-4.1673	0.0001097	0.00089976	0.89412
SLC2A2	-0.94268	6.6124	-4.1661	0.00011011	0.00090102	0.89056
ZFYVE26	0.20209	7.4038	4.1661	0.00011015	0.00090102	0.89026
ZNF280B	0.21999	5.2743	4.1664	0.00011003	0.00090102	0.89131
AUH	-0.33481	9.9781	-4.1657	0.00011027	0.00090122	0.88921
COL3A1	0.73697	10.056	4.1625	0.00011146	0.00091014	0.87904
H2AFY	0.35085	9.4328	4.1622	0.00011157	0.00091025	0.87808
CCT6A	0.36462	9.1285	4.1578	0.0001132	0.00092271	0.86436
GPSM2	0.23747	5.6979	4.1574	0.00011335	0.00092315	0.86307
FMO4	-0.58137	9.1906	-4.1563	0.00011377	0.0009257	0.85962
AUP1	0.29589	8.9894	4.153	0.00011505	0.00093535	0.84896
DDB1	-0.20161	10.191	-4.1521	0.00011537	0.00093713	0.84632
GTF2A2	-0.37394	11.004	-4.151	0.00011579	0.0009397	0.84289
PMM1	-0.35779	8.1716	-4.15	0.0001162	0.00094217	0.83957
PTP4A1	-0.31101	7.4489	-4.1467	0.00011746	0.00095154	0.82936
BID	0.42739	6.9924	4.1462	0.00011767	0.00095242	0.82765
AEN	0.2939	7.0934	4.139	0.00012052	0.00097463	0.80498
KCNJ2	0.60639	7.7278	4.1386	0.00012069	0.00097512	0.80367
BHMT	-1.0583	11.317	-4.1381	0.00012088	0.00097581	0.80217
TRIM15	-0.16755	6.2589	-4.1372	0.00012123	0.00097781	0.7994
GGH	-0.75103	8.9657	-4.134	0.00012254	0.00098746	0.78927
ARID5A	0.23129	6.3703	4.1331	0.00012289	0.00098944	0.78655
LRP2	-0.65053	8.3421	-4.131	0.00012375	0.00099551	0.77993
GLDC	-0.79502	9.3593	-4.1307	0.00012386	0.00099553	0.77908
GPR124	0.32214	7.0873	4.1296	0.00012431	0.00099829	0.77564
ULK1	-0.24467	7.9791	-4.1293	0.00012447	0.00099871	0.77441
AEBP1	0.79121	8.6141	4.1279	0.00012505	0.0010025	0.77003
IRF2BP1	-0.27257	8.2704	-4.1263	0.0001257	0.0010068	0.76513
CELP	-0.42285	6.2981	-4.1254	0.00012609	0.0010091	0.76217
LRBA	-0.29767	9.5883	-4.1217	0.00012764	0.0010206	0.75062
C1orf174	0.28223	7.7353	4.1198	0.00012843	0.001026	0.74477
PVALB	-0.67704	5.3954	-4.1195	0.00012858	0.0010263	0.74364
ALDH3B1	-0.27433	8.2459	-4.1148	0.00013057	0.0010413	0.72916
ABCA7	0.30096	5.8957	4.1143	0.00013078	0.0010421	0.72758
BTN2A2	0.28102	7.978	4.1139	0.00013095	0.0010425	0.72634
WDR26	-0.38923	9.839	-4.1135	0.00013113	0.001043	0.72509
PNPLA4	-0.28257	8.5977	-4.113	0.00013136	0.001044	0.72338
LRRC49	0.31563	7.3623	4.1121	0.00013173	0.001046	0.72074
ZNF146	-0.2534	8.8371	-4.1116	0.00013198	0.0010471	0.71898
YWHAH	0.44295	8.7786	4.1107	0.00013238	0.0010494	0.7161
MAP2K1	0.26744	9.9942	4.1083	0.00013341	0.0010562	0.70875
CLSTN2	-0.46613	6.62	-4.1082	0.00013347	0.0010562	0.70835
ANK2	-0.65896	7.5676	-4.1059	0.00013449	0.0010634	0.70109
DLAT	-0.29537	7.3264	-4.1036	0.00013552	0.0010701	0.69392
PRKCA	-0.19503	7.1446	-4.1032	0.00013569	0.0010701	0.6927
PEX3	-0.25921	8.2861	-4.1034	0.00013561	0.0010701	0.69325
DNASE1L1	0.30052	8.4255	4.1005	0.0001369	0.0010773	0.68432
UGP2	-0.2603	10.848	-4.1006	0.00013688	0.0010773	0.68445
CRIM1	-0.28307	11.556	-4.1004	0.00013696	0.0010773	0.68388
LHFPL2	0.6195	7.4749	4.1	0.00013712	0.0010777	0.6828
RTN1	0.48492	5.6763	4.099	0.00013757	0.0010789	0.6797
GNLY	0.75246	6.4212	4.0992	0.00013748	0.0010789	0.68029
RBM28	0.35083	7.6584	4.0989	0.00013763	0.0010789	0.67924
HDAC7	0.25918	7.2084	4.0973	0.00013836	0.0010837	0.67428
TRIM13	-0.27374	8.4129	-4.0967	0.00013865	0.001085	0.6723
TLR8	0.41641	5.6562	4.0959	0.00013899	0.0010868	0.66995
FAM188A	-0.26958	7.9133	-4.0957	0.00013912	0.0010869	0.6691
BACE1	-0.41542	9.2704	-4.0949	0.00013947	0.0010887	0.66671
KLC1	0.3031	8.37	4.0905	0.0001415	0.0011009	0.653
NDUFV2	-0.37187	9.5187	-4.0908	0.00014136	0.0011009	0.65396
KHDRBS3	0.32326	7.6967	4.091	0.00014125	0.0011009	0.65467
WDTC1	-0.23141	8.5469	-4.0906	0.00014144	0.0011009	0.6534
UBA7	0.37525	9.14	4.0901	0.00014167	0.0011012	0.65189
ATP2A3	0.28237	6.4585	4.0877	0.00014283	0.0011093	0.64419
PWP2	0.18985	7.7097	4.0846	0.00014429	0.0011197	0.63453
TNFSF14	0.24639	5.2249	4.0829	0.00014512	0.0011252	0.62909
ZDHHC4	-0.45199	8.6123	-4.0808	0.00014612	0.001132	0.62262
GIT2	0.24031	6.4024	4.0802	0.00014638	0.0011331	0.62092
EXT1	0.4182	8.7971	4.0795	0.00014674	0.0011339	0.61863
RAB31	0.47619	9.7586	4.0797	0.00014665	0.0011339	0.61922
APOBEC3A	0.8937	6.2285	4.0784	0.00014727	0.0011371	0.61519
EFNA1	0.28023	9.1402	4.0775	0.00014772	0.0011396	0.61229
VASP	0.21408	7.0352	4.0759	0.00014851	0.0011447	0.60729
B3GAT3	0.19899	8.4536	4.0738	0.00014954	0.0011517	0.60075
SECTM1	0.30918	7.7757	4.0731	0.00014988	0.0011534	0.59859
LASS2	-0.21658	11.286	-4.0719	0.00015045	0.0011568	0.59498
LEFTY1	-0.57709	6.6459	-4.0715	0.00015064	0.0011573	0.59381
NNMT	1.2082	7.2039	4.0702	0.0001513	0.0011607	0.58965
TRMT1	0.35089	7.1316	4.0701	0.00015133	0.0011607	0.58946
VAPA	-0.36602	11.497	-4.0688	0.00015202	0.001164	0.58519
TMSB15A	1.0024	9.2463	4.0689	0.00015196	0.001164	0.58552
C2	0.44818	7.3877	4.0671	0.00015286	0.0011695	0.57993
MFF	-0.23287	9.3083	-4.0662	0.00015334	0.0011722	0.577
FA2H	-0.22568	5.3625	-4.0657	0.00015358	0.001173	0.57552
MAP3K1	0.24213	5.1908	4.0648	0.000154	0.0011753	0.57293
PDIA5	0.41412	9.4302	4.0638	0.00015452	0.0011776	0.56972
TMEM185B	0.33455	7.9766	4.0637	0.00015456	0.0011776	0.56949
GLT8D2	0.4326	7.6799	4.0618	0.00015554	0.0011841	0.56352
ECHS1	-0.46198	11.941	-4.0587	0.00015716	0.0011928	0.55369
RNASE1	0.56452	11.943	4.0588	0.0001571	0.0011928	0.55406
CDKL2	-0.32163	5.8175	-4.0586	0.0001572	0.0011928	0.55348
CA10	-0.5683	9.5298	-4.0588	0.00015711	0.0011928	0.55398
AGAP1	-0.30422	7.3589	-4.0575	0.00015776	0.0011961	0.55009
KHK	-0.75666	9.1323	-4.0566	0.00015826	0.0011988	0.54712
THOC5	0.33417	8.5438	4.0561	0.00015852	0.0011997	0.54556
TRNAU1AP	0.30266	6.7752	4.0558	0.00015864	0.0011997	0.54487
TIA1	0.26947	6.9711	4.055	0.00015906	0.0012019	0.54237
CBX4	0.31818	5.829	4.0544	0.00015939	0.0012034	0.5404
ATP5C1	-0.18906	12.319	-4.0532	0.00016	0.001207	0.53679
TNIP1	0.34082	9.7071	4.0529	0.00016015	0.0012072	0.53589
PRF1	0.54843	7.1064	4.0516	0.00016084	0.0012114	0.53183
MTRR	-0.26642	9.3606	-4.0503	0.00016157	0.001216	0.52751
STMN3	0.41787	5.227	4.0492	0.00016215	0.0012183	0.52413
RPL39L	0.25457	6.049	4.0492	0.00016215	0.0012183	0.52416
GPR3	-0.28183	5.725	-4.0475	0.00016304	0.001224	0.51895
FYN	-0.32314	10.48	-4.0457	0.00016398	0.0012301	0.51352
GLUL	-0.32512	11.296	-4.044	0.00016494	0.0012362	0.50802
CUBN	-1.1365	9.1982	-4.0427	0.00016563	0.0012393	0.50409
MYCT1	0.4161	6.5082	4.0425	0.00016575	0.0012393	0.50338
COL21A1	0.56333	6.1364	4.0426	0.00016571	0.0012393	0.50359
RAB11FIP3	-0.33898	8.5189	-4.0421	0.00016596	0.0012398	0.5022
SH3BGR	-0.48783	7.7065	-4.0408	0.00016665	0.001244	0.49828
SPAG5	-0.44238	6.8789	-4.0396	0.00016731	0.0012479	0.49451
DPY19L1	0.38462	7.5187	4.0387	0.00016781	0.0012506	0.49172
CMAH	-0.69024	8.4485	-4.0375	0.0001685	0.0012548	0.4878
SH3GL2	-0.63262	6.5784	-4.0354	0.00016967	0.0012624	0.4813
A1CF	-0.6207	7.1629	-4.0323	0.00017139	0.0012742	0.47177
NINJ2	0.30711	6.3879	4.0301	0.0001726	0.0012806	0.46509
RENBP	-0.42275	6.9627	-4.03	0.00017267	0.0012806	0.4647
KIAA0922	0.28574	7.1044	4.03	0.00017271	0.0012806	0.46451
PART1	-0.25361	6.2796	-4.0296	0.00017294	0.0012806	0.46324
C7orf10	-0.65884	7.5662	-4.0297	0.00017284	0.0012806	0.4638
DAO	-0.84708	8.1232	-4.0278	0.00017396	0.0012871	0.45767
USP4	0.1988	9.2199	4.0273	0.0001742	0.0012878	0.45639
SLC16A4	-0.58514	7.9678	-4.0242	0.00017603	0.0013003	0.4465
C17orf90	0.28755	8.1954	4.0237	0.00017629	0.0013012	0.44509
NUDT9	0.29885	9.9853	4.023	0.00017667	0.001303	0.44307
HSD3B2	-0.38869	5.4481	-4.0188	0.00017917	0.0013196	0.42979
CCDC88A	0.23855	5.7423	4.0187	0.00017921	0.0013196	0.42957
AK1	0.28098	8.4796	4.0169	0.00018026	0.0013263	0.42406
HSPA2	-0.57611	10.374	-4.0147	0.00018158	0.0013349	0.41715
USH1C	-0.62841	8.0555	-4.014	0.000182	0.0013369	0.41499
DUSP9	-0.5314	6.6192	-4.0136	0.00018225	0.0013371	0.4137
MNDA	1.0813	7.3522	4.0134	0.00018232	0.0013371	0.41333
PDXDC1	-0.30309	10.017	-4.0127	0.00018275	0.0013393	0.41108
ELK1	-0.27482	8.57	-4.0112	0.00018365	0.0013432	0.40647
B3GALT2	-0.73823	7.5836	-4.0111	0.00018373	0.0013432	0.40605
OLFML1	0.37707	8.5348	4.0113	0.00018357	0.0013432	0.40685
CPSF7	-0.31507	9.1774	-4.0096	0.00018465	0.0013489	0.40131
KIAA1024	-0.31174	5.013	-4.0079	0.00018566	0.0013552	0.39619
MAN2B2	-0.26962	9.1232	-4.007	0.00018621	0.0013581	0.39337
PARD6A	-0.25638	7.0143	-4.0026	0.00018893	0.0013769	0.37969
ZNF280A	-0.25627	5.6181	-4.002	0.00018928	0.0013783	0.37793
REG1A	0.26762	5.77	3.9998	0.00019066	0.0013873	0.37107
GPHN	-0.44417	8.0894	-3.9994	0.00019086	0.0013877	0.37006
SNF8	0.33553	9.24	3.999	0.00019115	0.0013881	0.36866
WDFY3	-0.24951	8.0265	-3.9989	0.00019122	0.0013881	0.36829
HSPBAP1	0.34277	7.4161	3.9981	0.00019172	0.0013906	0.36584
SRPX	0.70215	6.9818	3.9968	0.00019251	0.0013953	0.36193
TXNDC15	0.26239	10.588	3.996	0.00019301	0.0013978	0.35947
ALAS1	0.42455	8.8537	3.9946	0.00019392	0.0014032	0.35507
PECI	-0.3972	10.147	-3.9943	0.00019412	0.0014036	0.35409
MGC87042	-0.22427	5.2369	-3.9936	0.00019455	0.0014056	0.35198
THBS4	-0.25399	6.6824	-3.9913	0.00019603	0.001413	0.34484
AP1M2	-0.38812	8.4682	-3.9917	0.00019576	0.001413	0.34612
CAMSAP1L1	-0.23225	8.7359	-3.9913	0.00019601	0.001413	0.3449
PDE3B	-0.3798	6.9356	-3.99	0.00019683	0.0014176	0.34099
MPG	0.28554	8.1584	3.9887	0.00019767	0.0014225	0.33698
COL15A1	0.94126	6.8667	3.9882	0.00019799	0.0014227	0.33541
SSX2IP	-0.22493	6.7533	-3.9883	0.00019795	0.0014227	0.33564
FAM46C	-0.27324	6.2045	-3.988	0.00019816	0.0014228	0.33461
PKD2L1	-0.25537	7.0608	-3.9866	0.00019905	0.001428	0.33041
DDX10	-0.34681	8.9678	-3.9848	0.00020023	0.0014343	0.32482
HDAC1	0.26874	10.122	3.9849	0.00020014	0.0014343	0.32524
RALYL	-0.76705	7.8083	-3.9836	0.00020101	0.0014387	0.32114
LSM7	0.47784	7.4294	3.9815	0.00020241	0.0014476	0.3146
TGM5	-0.35251	7.1926	-3.9789	0.00020412	0.0014587	0.30666
MPP3	-0.33734	7.4095	-3.9764	0.0002058	0.0014695	0.2989
HAO1	-0.28906	5.0401	-3.9762	0.00020594	0.0014695	0.29827
KEAP1	0.25853	9.1845	3.9756	0.00020632	0.001471	0.29653
GAS2	0.60504	8.6065	3.9749	0.00020677	0.0014731	0.29447
TFPT	0.31077	7.1997	3.974	0.0002074	0.0014765	0.29158
ECHDC3	-0.66133	9.7722	-3.9726	0.00020831	0.0014818	0.28745
CRABP1	-0.30312	5.7881	-3.9696	0.00021041	0.0014948	0.27799
PARK2	-0.23454	5.44	-3.9695	0.00021046	0.0014948	0.27778
NOX4	-0.73296	9.1563	-3.969	0.00021081	0.0014961	0.27617
RRP7A	0.36724	6.9824	3.9676	0.00021178	0.0015008	0.27184
TMEM165	0.30988	9.5251	3.9675	0.0002118	0.0015008	0.27176
TRAF5	-0.33071	8.8003	-3.9666	0.00021245	0.001502	0.26886
TYRO3	-0.40359	10.297	-3.9667	0.00021238	0.001502	0.2692
MFSD5	0.22727	9.4617	3.9668	0.00021234	0.001502	0.26934
DEFB1	-1.5034	10.313	-3.9658	0.00021299	0.0015047	0.26646
PIGB	-0.29005	8.7902	-3.9638	0.00021438	0.0015133	0.26035
COQ2	0.41386	7.0948	3.9623	0.00021545	0.0015197	0.25561
IL15RA	0.32462	8.2752	3.9616	0.00021591	0.0015218	0.25362
ATP6V1A	-0.34706	7.8475	-3.9605	0.0002167	0.0015243	0.25017
EIF2B4	0.19895	9.2698	3.9604	0.00021676	0.0015243	0.2499
SMG5	0.27227	7.7498	3.9606	0.00021666	0.0015243	0.25036
FOLR1	-0.64959	10.315	-3.9597	0.00021726	0.0015254	0.24776
PCDH24	-0.3509	7.8139	-3.9599	0.00021715	0.0015254	0.2482
PTER	-0.52732	6.5369	-3.9583	0.00021825	0.0015313	0.24343
CYP20A1	0.40035	6.567	3.9581	0.00021843	0.0015313	0.24268
LPIN1	-0.38981	8.4567	-3.9576	0.00021875	0.0015319	0.2413
ASPHD1	0.41517	6.7735	3.9575	0.00021884	0.0015319	0.24088
C2orf72	-0.16925	5.8317	-3.9557	0.00022014	0.0015398	0.2353
CCT6B	-0.33257	6.017	-3.9537	0.00022159	0.0015488	0.22913
CIRBP	-0.2921	11.823	-3.9521	0.00022275	0.0015557	0.22418
PTGDS	-0.45503	13.374	-3.9516	0.00022309	0.0015569	0.22274
HNRNPL	-0.31058	10.571	-3.9511	0.00022344	0.001557	0.22128
ZBTB40	0.16353	5.7193	3.9513	0.00022328	0.001557	0.22196
CLCC1	0.40449	5.5666	3.9508	0.00022367	0.0015574	0.22031
LCP1	0.74789	8.6504	3.9494	0.00022471	0.0015629	0.21593
MS4A5	-0.35887	5.6476	-3.9492	0.0002248	0.0015629	0.21554
LAT	0.26407	6.34	3.9485	0.00022535	0.0015655	0.21325
PSTPIP1	0.29231	5.5995	3.9475	0.00022604	0.001568	0.21035
USP47	-0.28006	9.279	-3.9477	0.00022591	0.001568	0.21091
A2BP1	-0.31712	6.5898	-3.9473	0.00022622	0.0015681	0.2096
CCDC99	0.33683	6.7084	3.9439	0.0002287	0.0015841	0.19932
OR1D2	-0.36107	6.8883	-3.9421	0.00023006	0.0015911	0.19374
DNAJC17	0.44437	5.6688	3.9421	0.00023004	0.0015911	0.19378
JAM2	0.52569	8.4291	3.9409	0.00023097	0.0015962	0.18999
NDUFS1	-0.28163	8.7015	-3.9397	0.00023186	0.0016011	0.18638
GPM6B	0.53657	6.7034	3.9374	0.00023358	0.0016106	0.17939
CDKN2AIP	-0.29758	7.2471	-3.9376	0.00023344	0.0016106	0.17998
IFITM2	0.29141	13.241	3.9371	0.00023381	0.0016109	0.17848
ADARB1	0.22947	6.7385	3.9366	0.00023424	0.0016126	0.17674
NCBP1	0.3903	6.4564	3.9352	0.00023528	0.0016126	0.17257
PXMP2	-0.52347	8.9345	-3.9357	0.00023491	0.0016126	0.17406
SHBG	-0.2182	6.5798	-3.9359	0.00023473	0.0016126	0.17477
ARPC5	0.216	11.399	3.9353	0.00023519	0.0016126	0.17291
ACOT7	-0.38987	8.9617	-3.9361	0.00023457	0.0016126	0.17539
KANK3	0.60404	8.4907	3.9355	0.00023509	0.0016126	0.1733
SLC11A1	0.35335	6.6601	3.9346	0.00023576	0.0016148	0.17062
SOX10	-0.23143	6.3761	-3.9343	0.00023601	0.0016153	0.16963
GNAI2	0.27646	9.2372	3.9337	0.00023644	0.001617	0.1679
MYL3	-0.35733	8.8099	-3.9325	0.00023736	0.0016197	0.16424
BRP44L	-0.27766	10.362	-3.9329	0.00023709	0.0016197	0.16534
GRHL2	-0.30932	5.4376	-3.9327	0.00023721	0.0016197	0.16484
LTA4H	0.28064	11.114	3.9317	0.00023797	0.0016227	0.16183
MAP3K11	0.29545	8.3884	3.9305	0.00023893	0.001628	0.15802
LANCL1	-0.21873	10.2	-3.9293	0.00023983	0.0016329	0.1545
FXYD3	-0.37135	7.2839	-3.9287	0.00024028	0.0016348	0.15273
SLC12A3	-0.46964	7.2296	-3.927	0.00024163	0.0016427	0.14745
OGDHL	-0.9142	9.3245	-3.9256	0.00024276	0.0016483	0.14304
C8orf51	-0.20845	6.6992	-3.9255	0.0002428	0.0016483	0.14287
SMARCD2	0.31803	8.4467	3.9214	0.00024608	0.0016693	0.13024
CREB3	0.23475	9.478	3.9181	0.00024868	0.0016858	0.1203
FUT3	-0.27113	6.1839	-3.9178	0.00024892	0.0016861	0.11941
CRYAA	-0.80417	7.5722	-3.9173	0.00024931	0.0016875	0.11792
TESC	0.33454	6.0179	3.915	0.00025119	0.001699	0.11084
NOSIP	0.45675	9.2987	3.9146	0.00025154	0.0017001	0.10953
TNKS2	-0.36662	8.5487	-3.914	0.00025205	0.0017023	0.10761
CASP9	-0.26592	8.6924	-3.9133	0.00025262	0.0017049	0.1055
AHCYL2	-0.18848	7.572	-3.9127	0.00025307	0.0017067	0.10382
SLC28A1	-0.31316	6.2883	-3.9118	0.00025381	0.0017104	0.10106
WWP1	-0.40992	8.9076	-3.9114	0.00025416	0.0017115	0.099757
NADSYN1	0.49309	7.4638	3.911	0.00025445	0.0017123	0.098675
ATP13A1	0.28654	7.7221	3.9107	0.00025469	0.0017126	0.097785
ACSF2	-0.65044	9.0777	-3.9092	0.00025596	0.0017199	0.093098
KPNA2	0.51112	9.7316	3.9087	0.00025634	0.0017212	0.091703
PCSK5	0.49035	6.0949	3.907	0.00025777	0.0017295	0.08648
HNF4A	-0.1602	5.6705	-3.9054	0.00025915	0.0017375	0.081437
OSBP	-0.21185	9.224	-3.904	0.00026033	0.0017442	0.077134
MAP3K10	-0.31527	7.54	-3.9021	0.00026194	0.0017529	0.071338
OSTF1	0.38865	9.6896	3.902	0.00026202	0.0017529	0.071061
ZNF443	0.33889	5.2878	3.9016	0.0002623	0.0017536	0.070027
MGST2	0.20825	10.675	3.9009	0.00026289	0.0017562	0.067923
CLEC4A	0.48721	5.8385	3.9007	0.00026313	0.0017566	0.067057
NOS3	0.35626	5.8601	3.9003	0.00026347	0.0017576	0.065839
TK1	0.28623	6.4298	3.8988	0.00026469	0.0017644	0.061481
CFB	0.75312	7.5358	3.898	0.00026543	0.0017668	0.058858
SMYD5	-0.19633	7.5142	-3.898	0.00026543	0.0017668	0.058849
FAM20B	-0.38135	8.9599	-3.8959	0.00026722	0.0017762	0.052512
CORO7	0.21384	6.4497	3.8961	0.00026707	0.0017762	0.05307
LIN28	-0.30119	4.9198	-3.8948	0.00026813	0.0017809	0.049308
KTN1	-0.21584	9.7933	-3.8925	0.00027015	0.0017918	0.042237
ZCCHC24	0.3603	8.5455	3.8925	0.00027016	0.0017918	0.042202
EVI2A	1.0117	6.8144	3.8915	0.00027105	0.0017938	0.039115
GJA8	-0.2872	6.4399	-3.8918	0.00027077	0.0017938	0.040073
HDAC11	-0.30374	7.4836	-3.8915	0.000271	0.0017938	0.039292
HSPB3	0.23702	5.8078	3.8908	0.00027167	0.0017967	0.036952
NPY1R	0.59085	9.8373	3.8888	0.00027343	0.001807	0.030879
COL6A2	0.54483	6.4629	3.8883	0.00027385	0.0018085	0.029417
PSMC4	0.22784	8.8951	3.8862	0.00027569	0.0018189	0.023115
PIGZ	-0.31799	7.2194	-3.8861	0.00027582	0.0018189	0.022675
TRAPPC10	-0.23712	7.3683	-3.8858	0.00027606	0.0018191	0.021844
RAPGEF4	0.67005	7.3625	3.8851	0.00027665	0.0018191	0.019847
FAM38B	0.43726	6.9227	3.8853	0.00027648	0.0018191	0.020412
ZSCAN16	0.36178	5.9446	3.8856	0.00027628	0.0018191	0.021088
MAP3K9	-0.23148	6.2296	-3.884	0.00027764	0.0018232	0.016481
PTPRD	-0.39015	8.2896	-3.8838	0.00027787	0.0018232	0.015712
DYNLT1	0.17828	11.778	3.8839	0.0002778	0.0018232	0.015938
CA1	-0.35149	7.0438	-3.8827	0.00027885	0.0018284	0.012391
CD244	0.20273	5.9154	3.8822	0.00027927	0.0018298	0.010969
IGKV3-20	0.44669	5.3158	3.8814	0.00028	0.001832	0.008497
YEATS2	0.28598	8.0676	3.8815	0.00027994	0.001832	0.0087
RAB11FIP2	-0.30598	8.7943	-3.881	0.00028035	0.001833	0.0073415
FAS	0.37452	6.7752	3.8804	0.00028094	0.0018356	0.0053487
MSRA	-0.57494	10.848	-3.8794	0.00028184	0.0018391	0.0023385
ROBO3	0.24921	5.9326	3.8793	0.00028188	0.0018391	0.0022121
NDUFA4L2	0.42606	6.0509	3.8791	0.00028211	0.0018393	0.0014352
ERG	0.54507	9.2835	3.8775	0.00028353	0.0018473	-0.003305
CPB2	-0.23711	4.8798	-3.8767	0.0002843	0.001851	-0.0058686
CAV3	-0.21435	7.2527	-3.8755	0.00028541	0.0018569	-0.0095334
EMID1	0.34346	8.818	3.875	0.00028586	0.0018585	-0.011025
PSG5	-0.57962	7.0279	-3.8738	0.000287	0.0018622	-0.014752
ING3	0.44542	7.2847	3.8739	0.00028683	0.0018622	-0.014209
GDPD2	-0.28567	7.0336	-3.8737	0.00028703	0.0018622	-0.014857
RIN3	0.26983	6.6502	3.8735	0.00028723	0.0018622	-0.01552
EDF1	0.3013	10.354	3.8723	0.00028838	0.0018683	-0.019292
TIMM8B	0.21287	10.903	3.8716	0.00028895	0.0018707	-0.021151
NOTCH4	0.39382	7.9527	3.871	0.00028954	0.0018732	-0.023065
SLC47A1	-0.9946	9.5993	-3.8701	0.00029038	0.0018773	-0.025783
PDGFRA	0.7532	8.9269	3.8684	0.00029198	0.0018863	-0.030963
TBXAS1	0.35491	7.8621	3.8673	0.00029301	0.0018916	-0.034278
DSE	0.35413	9.1263	3.8652	0.000295	0.0019032	-0.040669
OCA2	-0.38645	7.6155	-3.8646	0.00029559	0.0019057	-0.042549
SOD2	0.77237	7.8119	3.863	0.0002971	0.001914	-0.047326
OR1G1	-0.3379	6.3947	-3.862	0.00029807	0.0019163	-0.050419
HCN4	-0.17005	4.7982	-3.8621	0.00029795	0.0019163	-0.050038
NPTXR	0.27524	5.6051	3.8623	0.00029783	0.0019163	-0.049635
LUZP4	-0.32471	7.473	-3.861	0.00029905	0.0019212	-0.053482
ABCC6	-0.28093	5.0145	-3.8591	0.00030088	0.0019249	-0.059238
TUBB3	0.32738	6.9054	3.8593	0.00030066	0.0019249	-0.058553
SUPT16H	-0.63098	10.006	-3.8601	0.00029988	0.0019249	-0.05611
ZC3H7B	-0.29875	7.9384	-3.8597	0.00030028	0.0019249	-0.057364
SLC43A3	0.38437	7.8882	3.8599	0.00030013	0.0019249	-0.05688
RIPK4	-0.61916	7.8878	-3.8592	0.00030075	0.0019249	-0.058834
TRHDE	-0.55738	6.2113	-3.8584	0.00030152	0.0019277	-0.061237
MS4A4A	1.0965	5.6353	3.8564	0.00030349	0.0019389	-0.06738
ATP12A	-0.28649	6.4835	-3.856	0.00030387	0.00194	-0.068566
PRR13	-0.22457	11.882	-3.8542	0.00030566	0.0019501	-0.074097
GLS	-0.41728	10.226	-3.8531	0.00030672	0.0019555	-0.077339
ART3	-0.24244	4.8411	-3.8504	0.00030938	0.0019711	-0.085474
ABCG2	-0.36701	6.3858	-3.8492	0.00031062	0.0019763	-0.089251
PGRMC1	-0.25146	10.402	-3.8493	0.00031052	0.0019763	-0.088949
SRGN	0.59572	10.123	3.8473	0.00031245	0.0019866	-0.094781
CST6	0.60154	5.0418	3.8466	0.0003132	0.0019886	-0.097025
FBXO3	-0.3153	9.3528	-3.8467	0.00031306	0.0019886	-0.096612
LCAT	0.34384	6.054	3.8463	0.00031345	0.0019888	-0.097786
LUC7L	0.3169	7.8699	3.8455	0.00031432	0.0019929	-0.10039
CHST15	0.61552	8.7398	3.8452	0.00031459	0.0019933	-0.10121
IL25	-0.20253	6.6159	-3.8436	0.00031618	0.002002	-0.10595
KLF9	-0.41535	6.9144	-3.842	0.00031782	0.002011	-0.1108
LRRK1	0.1625	6.1346	3.8414	0.00031844	0.0020135	-0.11265
EXOSC10	0.58472	7.5854	3.8395	0.00032045	0.0020248	-0.11857
TLR7	0.35396	4.8062	3.8384	0.00032156	0.0020305	-0.12183
POP4	0.22773	9.709	3.8368	0.00032315	0.0020391	-0.12646
DMXL1	-0.33765	9.0054	-3.8354	0.0003246	0.0020469	-0.13068
SSR4	0.23501	10.976	3.8349	0.00032515	0.0020489	-0.13227
HEY2	0.30664	5.7944	3.8343	0.00032584	0.0020519	-0.13427
IDO1	0.93856	8.0111	3.8337	0.00032645	0.0020529	-0.13603
TFIP11	0.20444	8.8612	3.8338	0.00032633	0.0020529	-0.13568
BCL2A1	0.79321	5.1566	3.8312	0.00032907	0.0020652	-0.14355
TGFA	-0.16227	6.15	-3.8315	0.00032875	0.0020652	-0.14263
TFCP2L1	-0.55644	7.6093	-3.8313	0.00032892	0.0020652	-0.14313
GOLGA4	-0.2576	10.251	-3.8297	0.00033064	0.0020729	-0.14803
RRM2	0.944	5.7748	3.8296	0.00033076	0.0020729	-0.14837
SERPINA5	-1.2136	9.1991	-3.8292	0.00033119	0.0020742	-0.14959
OAS1	0.79379	8.9682	3.8281	0.00033234	0.0020794	-0.15284
TBC1D2	0.31991	5.6947	3.828	0.00033247	0.0020794	-0.15322
ABCD3	-0.4183	9.5499	-3.8257	0.00033486	0.0020928	-0.15996
C1orf63	0.3659	9.8146	3.8255	0.00033506	0.0020928	-0.16052
TPST2	0.45847	9.4757	3.8243	0.00033638	0.0020996	-0.16422
IVL	-0.32203	6.5921	-3.8233	0.00033745	0.0021048	-0.16721
SYTL2	0.30957	5.5458	3.822	0.00033888	0.0021123	-0.1712
C11orf10	0.21625	11.691	3.8217	0.00033926	0.0021133	-0.17225
PPID	0.25932	8.7512	3.821	0.00034002	0.0021166	-0.17435
MPRIP	0.32765	11.449	3.818	0.00034321	0.002135	-0.18313
SLC1A3	0.45376	6.3084	3.8165	0.00034494	0.00214	-0.18786
ACAA2	-0.42509	11.854	-3.8167	0.00034466	0.00214	-0.1871
GOLPH3L	-0.22028	10.184	-3.8168	0.00034459	0.00214	-0.1869
PRUNE	-0.1879	7.9622	-3.8166	0.00034479	0.00214	-0.18745
RP11-35N6.1	-0.80916	7.5271	-3.8159	0.00034554	0.0021423	-0.1895
GCLM	-0.3584	8.0965	-3.8138	0.00034787	0.0021553	-0.19582
DNAJB1	-0.64546	8.9793	-3.8104	0.00035175	0.0021778	-0.20626
RUNDC3A	-0.24396	6.064	-3.8093	0.00035298	0.002184	-0.20954
FZD7	-0.54793	7.602	-3.8081	0.00035431	0.0021907	-0.21307
PRC1	0.6808	6.7631	3.8059	0.00035681	0.0022039	-0.21968
EMILIN1	0.40575	5.9302	3.8058	0.00035692	0.0022039	-0.21996
BTG2	-0.32699	8.3852	-3.8054	0.00035734	0.002205	-0.22107
DOHH	0.3398	6.998	3.8052	0.00035762	0.0022053	-0.22181
CRLF3	0.34507	9.1204	3.8047	0.00035814	0.002207	-0.22319
DENND5A	0.28464	9.8531	3.8042	0.00035878	0.0022078	-0.22486
PPWD1	0.36807	6.4606	3.804	0.00035898	0.0022078	-0.22538
CHMP4A	0.3045	9.7379	3.8044	0.00035853	0.0022078	-0.22421
ITGA5	0.24903	8.1085	3.8021	0.00036116	0.0022183	-0.23107
SEZ6L	-0.24995	6.5622	-3.8021	0.00036118	0.0022183	-0.23113
SLC13A1	-0.90095	6.7578	-3.7993	0.00036442	0.0022352	-0.23952
KIAA1704	0.36515	5.3503	3.7992	0.00036451	0.0022352	-0.23975
NTAN1	0.31881	8.8098	3.7991	0.00036466	0.0022352	-0.24014
ASPA	-0.72618	9.0251	-3.7979	0.00036608	0.0022424	-0.2438
NUP88	0.33884	8.2308	3.7958	0.00036843	0.0022553	-0.24981
ARHGAP5	-0.41957	8.3469	-3.7952	0.00036921	0.0022586	-0.25179
TMED5	-0.31753	9.9004	-3.7934	0.00037127	0.0022697	-0.25705
LRP3	0.36789	6.9162	3.7931	0.00037163	0.0022704	-0.25795
SLC16A2	-0.24754	7.4128	-3.792	0.00037295	0.002277	-0.26128
TIE1	0.51817	7.2968	3.7907	0.00037448	0.0022833	-0.26514
SPATA2L	-0.37059	7.4475	-3.7908	0.00037438	0.0022833	-0.26488
ZNF197	0.18953	5.5534	3.7904	0.00037488	0.0022842	-0.26613
CNTFR	-0.1904	6.7559	-3.7883	0.00037745	0.0022984	-0.27256
NQO2	-0.59313	10.561	-3.7873	0.00037858	0.0023037	-0.27536
CLCA1	-0.2312	5.9459	-3.7868	0.00037915	0.0023057	-0.27678
MAPK1	0.29881	7.1826	3.7856	0.00038063	0.0023131	-0.28044
KIAA1797	0.36558	8.206	3.7852	0.00038116	0.0023148	-0.28175
ABAT	-0.63332	9.2176	-3.7847	0.00038176	0.0023154	-0.28323
APBA3	0.24392	6.9416	3.7849	0.00038156	0.0023154	-0.28274
ITPKB	0.39074	7.5311	3.7814	0.00038575	0.0023381	-0.29301
ABHD10	-0.34471	9.7432	-3.7784	0.00038948	0.0023591	-0.30203
OPN3	-0.30343	9.3652	-3.7772	0.00039098	0.0023667	-0.30567
SC65	0.2598	6.4419	3.7768	0.00039152	0.0023684	-0.30696
SS18L1	-0.29291	7.6213	-3.7735	0.00039567	0.0023919	-0.31687
RAB17	-0.61058	8.2088	-3.7732	0.00039593	0.0023919	-0.31748
ODF1	-0.16549	5.7677	-3.7721	0.00039739	0.0023992	-0.32093
LILRA2	0.27193	5.3746	3.7709	0.00039886	0.0024064	-0.3244
MYH9	-0.32534	10.729	-3.7692	0.000401	0.0024131	-0.32945
PPP2R1B	-0.21604	7.2159	-3.7698	0.00040028	0.0024131	-0.32775
METTL5	-0.25808	10.536	-3.7694	0.00040078	0.0024131	-0.32891
TMED9	0.24799	11.507	3.7695	0.00040068	0.0024131	-0.32869
EPHB4	0.2983	7.2533	3.7688	0.00040161	0.0024142	-0.33087
GPX5	-0.16893	4.8398	-3.7687	0.00040172	0.0024142	-0.33112
CRTAC1	0.67916	7.597	3.7677	0.00040304	0.0024206	-0.33419
CCNB1IP1	-0.29939	8.9257	-3.767	0.00040384	0.0024238	-0.33607
NOD2	0.31971	5.2946	3.7666	0.00040437	0.0024255	-0.33731
COL4A6	-0.24096	6.7764	-3.7652	0.00040616	0.0024314	-0.34146
PSG4	-0.33248	7.033	-3.7652	0.00040613	0.0024314	-0.34139
GJD2	-0.2889	6.7628	-3.7655	0.00040575	0.0024314	-0.3405
MAP3K8	0.4211	5.2102	3.7645	0.00040705	0.0024336	-0.3435
KLHL2	0.26922	9.1741	3.7647	0.00040687	0.0024336	-0.3431
PPAP2A	0.31479	12.411	3.7639	0.00040788	0.002437	-0.34542
LYPD1	0.85825	6.2502	3.7632	0.00040883	0.0024411	-0.34761
FGFR4	-0.438	7.7824	-3.762	0.00041029	0.0024482	-0.35094
EPHX2	-0.67849	9.4966	-3.7613	0.0004113	0.0024495	-0.35326
SLC25A44	-0.25737	8.2974	-3.7613	0.00041124	0.0024495	-0.35314
GRAP	0.2147	5.1749	3.7613	0.00041129	0.0024495	-0.35324
PSMB4	0.1798	11.536	3.7607	0.00041206	0.0024524	-0.355
BCL3	0.23145	6.3357	3.7593	0.00041387	0.0024539	-0.3591
COL4A5	-0.31276	9.4167	-3.7598	0.0004132	0.0024539	-0.35759
RGS7	-0.52021	5.922	-3.7599	0.00041303	0.0024539	-0.35721
PIK3R3	0.46016	7.7058	3.7591	0.00041417	0.0024539	-0.35979
VNN2	0.74247	7.6598	3.7593	0.00041392	0.0024539	-0.35923
HECW1	-0.17034	4.9362	-3.7596	0.00041352	0.0024539	-0.35832
IFIH1	0.58376	7.973	3.7591	0.00041417	0.0024539	-0.35979
KCNV2	-0.32032	6.9064	-3.757	0.00041689	0.0024684	-0.36593
CCL1	-0.17554	5.4898	-3.7552	0.00041925	0.0024808	-0.37124
ZNF395	-0.26384	7.8252	-3.7545	0.00042024	0.0024851	-0.37346
DOLK	0.20666	8.5452	3.754	0.00042092	0.0024875	-0.37499
BPHL	-0.48201	7.7705	-3.7514	0.0004244	0.0025046	-0.38272
TXNRD2	-0.48002	9.0872	-3.7515	0.00042427	0.0025046	-0.38242
AFG3L2	-0.24429	9.2034	-3.7512	0.00042464	0.0025046	-0.38324
FAM64A	0.56614	5.5333	3.7507	0.00042538	0.0025074	-0.38488
LPCAT4	0.29061	6.748	3.75	0.00042623	0.0025108	-0.38676
TSPAN14	0.25766	9.4784	3.7488	0.0004279	0.002519	-0.39042
PDCD2	0.29915	7.7333	3.748	0.00042902	0.002524	-0.39287
OLA1	-0.34877	10.06	-3.7466	0.00043085	0.0025331	-0.39687
BHLHE40	-0.47654	7.6785	-3.7461	0.00043159	0.0025343	-0.39849
C5orf54	0.35023	6.6892	3.7462	0.00043151	0.0025343	-0.39831
FDX1	-0.365	9.0418	-3.7437	0.00043491	0.0025521	-0.40567
STS	0.24504	6.942	3.7431	0.00043564	0.002554	-0.40725
GML	-0.38374	6.1669	-3.743	0.00043577	0.002554	-0.40754
APCS	-0.15468	5.347	-3.7412	0.00043838	0.0025667	-0.41315
CHST1	-0.4759	7.1426	-3.7411	0.0004385	0.0025667	-0.41341
AMOTL2	-0.29144	9.8839	-3.7397	0.00044036	0.0025759	-0.41737
DMD	-0.36998	6.8606	-3.7395	0.00044067	0.0025761	-0.41804
EVI2B	0.96675	6.7775	3.7386	0.000442	0.0025822	-0.42086
FEZ1	0.2299	8.6431	3.738	0.00044281	0.0025854	-0.42259
PGP	0.35433	6.4684	3.7374	0.00044366	0.0025887	-0.42438
PTRH2	0.20062	8.4454	3.7344	0.00044793	0.0026119	-0.43337
TAC3	-0.32495	7.6007	-3.7323	0.00045093	0.0026277	-0.43964
SPHK1	0.41165	6.5729	3.7308	0.00045303	0.0026361	-0.44399
SSBP3	-0.44666	8.509	-3.7308	0.000453	0.0026361	-0.44395
PGBD5	-0.36698	7.102	-3.7307	0.00045321	0.0026361	-0.44438
PHGDH	-0.62235	8.1417	-3.73	0.00045409	0.0026386	-0.4462
EFHD2	0.35444	7.0946	3.7298	0.00045442	0.0026386	-0.44689
CRISPLD2	-0.83299	8.3283	-3.7297	0.00045451	0.0026386	-0.44707
HOXB2	0.28981	9.7075	3.7277	0.00045752	0.0026527	-0.45326
AGPAT4	0.26307	6.8094	3.7278	0.00045726	0.0026527	-0.45272
TGFBR2	0.47188	10.973	3.7269	0.00045868	0.0026578	-0.45565
PUS1	0.30749	6.0245	3.7264	0.00045939	0.0026586	-0.45709
SLCO4C1	-0.76029	6.3313	-3.7264	0.00045934	0.0026586	-0.45699
TERF2	-0.30027	8.9087	-3.7256	0.00046056	0.0026637	-0.45948
VPS13A	-0.25644	6.4755	-3.7243	0.00046242	0.0026728	-0.46326
BIN1	-0.39938	8.3988	-3.7199	0.00046886	0.002708	-0.47623
RNF39	-0.40897	7.0371	-3.7198	0.0004691	0.002708	-0.47671
PDGFB	0.23558	7.0427	3.7176	0.00047227	0.002723	-0.48304
SPDEF	-0.22797	7.7661	-3.7176	0.0004723	0.002723	-0.4831
LOC442271	-0.3193	6.3273	-3.7167	0.00047366	0.0027292	-0.4858
DAB2	-0.27191	10.719	-3.7153	0.00047579	0.0027398	-0.49001
TNC	0.71171	8.8308	3.7134	0.0004786	0.0027542	-0.49553
PARP8	0.25846	7.4695	3.7103	0.00048324	0.0027792	-0.50459
IL1R1	0.27247	7.0191	3.7097	0.0004842	0.002783	-0.50645
NUBP1	0.28159	8.4543	3.7077	0.00048732	0.0027992	-0.51248
LGALS9	0.27554	7.2101	3.7066	0.00048894	0.002805	-0.51559
RAD51AP1	0.29982	4.8966	3.7067	0.00048882	0.002805	-0.51535
GSTTP1	-0.44625	7.6025	-3.7062	0.00048964	0.0028072	-0.51693
PRKAB1	-0.29673	8.0434	-3.7059	0.00048999	0.0028075	-0.5176
ACADSB	-0.47612	7.6197	-3.7041	0.00049287	0.0028167	-0.52308
PIK3C2G	-0.27248	5.3107	-3.7041	0.00049288	0.0028167	-0.52311
SYNGR2	0.18011	10.411	3.7039	0.00049313	0.0028167	-0.52359
SPCS3	0.32069	7.4617	3.7047	0.00049194	0.0028167	-0.52132
Human	-0.32304	7.3971	-3.7044	0.00049241	0.0028167	-0.52222
BIK	-0.36448	6.6146	-3.7037	0.00049355	0.0028174	-0.52439
CRKRS	0.2206	6.7313	3.7033	0.00049415	0.0028191	-0.52553
ASB9	-0.37076	7.0467	-3.703	0.00049456	0.0028196	-0.52629
RBKS	-0.31079	8.8514	-3.7028	0.00049492	0.0028199	-0.52698
WNT10B	-0.31917	7.5431	-3.7014	0.00049703	0.0028302	-0.53097
PHLDB1	0.29354	7.7377	3.6987	0.00050128	0.0028526	-0.53895
KCNA4	-0.25141	6.1495	-3.6977	0.00050286	0.0028599	-0.54192
IRF8	0.58585	7.9268	3.697	0.00050402	0.0028647	-0.54407
CAP1	0.19831	11.854	3.6959	0.00050577	0.0028721	-0.54732
RAB40B	-0.31705	8.6917	-3.6958	0.00050595	0.0028721	-0.54766
CACNG4	-0.25181	7.2245	-3.6951	0.00050705	0.0028755	-0.5497
CROP	0.40681	9.4257	3.695	0.00050717	0.0028755	-0.54991
C6orf15	-0.23469	7.3383	-3.6944	0.00050814	0.0028792	-0.5517
C10orf68	-0.31003	5.9944	-3.6932	0.00051014	0.0028888	-0.55538
LOC441601	-0.26873	6.2266	-3.6917	0.00051243	0.0029	-0.5596
ARID5B	-0.74137	9.6574	-3.6896	0.00051587	0.0029177	-0.56587
FXYD1	-0.45564	8.3096	-3.6893	0.00051636	0.0029186	-0.56675
VSNL1	-0.26315	5.6467	-3.6883	0.00051797	0.0029245	-0.56966
RHBG	-0.38021	7.1464	-3.6883	0.00051802	0.0029245	-0.56976
CLCN6	-0.27457	8.2668	-3.688	0.00051843	0.002925	-0.57051
VAMP2	-0.29351	7.9543	-3.686	0.00052182	0.0029405	-0.57661
ATPAF2	0.22813	6.3135	3.6861	0.00052156	0.0029405	-0.57615
COMP	0.58414	5.229	3.6856	0.00052238	0.0029419	-0.57762
PTPRT	-0.26711	6.0184	-3.6843	0.00052454	0.0029522	-0.58149
EGFR	-0.21218	7.2976	-3.6836	0.00052578	0.0029574	-0.58369
MEF2A	0.35697	6.054	3.6831	0.00052655	0.0029599	-0.58508
CCNB2	0.47569	6.1966	3.6822	0.00052798	0.0029661	-0.58761
GALR3	-0.30284	7.6999	-3.682	0.0005284	0.0029667	-0.58837
B3GNTL1	0.2359	5.4769	3.6794	0.00053263	0.0029886	-0.59583
FLT3LG	0.21583	5.0178	3.6786	0.00053399	0.0029908	-0.59822
ST3GAL2	0.17793	5.6841	3.6787	0.00053387	0.0029908	-0.59802
CARD9	0.25821	6.6191	3.6788	0.00053376	0.0029908	-0.59783
NQO1	-0.34869	11.209	-3.676	0.00053834	0.0030097	-0.60584
SLC22A18	-0.59981	9.1574	-3.6762	0.00053803	0.0030097	-0.6053
TFPI2	0.75395	9.0553	3.6762	0.00053811	0.0030097	-0.60543
ASCL3	-0.30816	6.1021	-3.6745	0.00054092	0.0030223	-0.61031
ZSCAN5A	-0.28003	7.1119	-3.6703	0.0005482	0.0030611	-0.62284
GMPPB	0.28342	8.3662	3.6696	0.00054934	0.0030656	-0.62479
PRPF3	0.36691	7.3803	3.6694	0.00054972	0.0030659	-0.62543
PTH1R	-0.40074	10.97	-3.6681	0.00055194	0.0030764	-0.62921
SMAD7	0.42672	8.6339	3.6668	0.00055416	0.0030813	-0.63298
BANP	0.20397	8.3356	3.6672	0.00055353	0.0030813	-0.6319
ACSS3	-0.33252	6.7353	-3.6671	0.0005537	0.0030813	-0.63219
MT1P2	-0.31785	9.685	-3.667	0.00055385	0.0030813	-0.63245
ING1	-0.39452	7.7145	-3.6664	0.00055493	0.0030837	-0.63427
HPX	-0.22114	7.1275	-3.6647	0.00055777	0.0030976	-0.63906
GALNT11	-0.29073	10.653	-3.6643	0.00055857	0.0030984	-0.6404
TTLL7	0.20118	5.7176	3.6644	0.00055836	0.0030984	-0.64004
PPP1R10	-0.30724	8.3943	-3.6638	0.00055938	0.003101	-0.64176
KLF10	-0.50339	10.45	-3.6631	0.00056074	0.0031067	-0.64404
ATP10B	-0.42306	6.4393	-3.6627	0.00056142	0.0031073	-0.64517
BCAP29	0.23883	6.107	3.6626	0.00056152	0.0031073	-0.64534
XPO7	-0.25652	7.2338	-3.6621	0.00056236	0.0031087	-0.64674
BBC3	0.32723	6.628	3.6621	0.00056245	0.0031087	-0.64689
HS2ST1	-0.22916	7.8571	-3.6588	0.00056825	0.0031369	-0.65649
ST6GALNAC4	0.23798	6.1033	3.659	0.00056798	0.0031369	-0.65606
SLC12A8	0.26112	5.2758	3.6578	0.00057012	0.0031454	-0.65958
HSD11B2	-1.3008	8.2812	-3.6567	0.00057207	0.0031543	-0.66278
FHL3	0.23583	7.2243	3.6559	0.0005734	0.0031569	-0.66494
ITGAE	0.21655	9.4967	3.6558	0.00057359	0.0031569	-0.66525
MRS2	-0.26505	7.3426	-3.656	0.00057329	0.0031569	-0.66477
ERBB2IP	-0.37105	9.3211	-3.6532	0.00057839	0.0031815	-0.67307
CXCL3	0.28987	5.0351	3.6526	0.00057938	0.003185	-0.67466
STIL	0.22678	5.984	3.6507	0.00058292	0.0032016	-0.68038
TSHB	-0.27921	5.6755	-3.6506	0.00058309	0.0032016	-0.68065
CYP2C9	-0.38998	6.5489	-3.6487	0.00058656	0.0032149	-0.68621
DDAH1	-0.65499	10.561	-3.6487	0.0005865	0.0032149	-0.68611
TNFAIP8	0.59694	8.0011	3.6487	0.00058646	0.0032149	-0.68604
NBEAL2	0.20504	5.5473	3.6483	0.00058732	0.0032172	-0.68741
ZXDC	-0.20057	8.0366	-3.6471	0.0005894	0.0032267	-0.69073
SERPINA4	-0.36076	6.2137	-3.6445	0.00059434	0.0032479	-0.69853
DKK3	0.72993	8.2614	3.6448	0.00059377	0.0032479	-0.69764
PLEKHG6	-0.21062	5.3764	-3.6445	0.00059433	0.0032479	-0.69853
NAP1L2	-0.31357	8.6334	-3.644	0.0005952	0.0032507	-0.6999
MAP3K7IP2	-0.1844	8.5346	-3.6428	0.00059751	0.0032614	-0.70352
CHRND	-0.19028	5.3517	-3.6403	0.0006021	0.0032845	-0.71068
CHST5	-0.27773	7.1171	-3.64	0.00060267	0.0032856	-0.71157
FLII	0.19147	8.6849	3.6397	0.00060324	0.0032868	-0.71246
PPT1	0.18321	11.438	3.6393	0.00060409	0.0032895	-0.71378
OAZ2	0.1803	9.9019	3.6382	0.00060616	0.0032969	-0.71698
PLA1A	0.55249	9.3266	3.6383	0.00060597	0.0032969	-0.71669
TOLLIP	-0.20163	7.629	-3.6376	0.00060728	0.003301	-0.71871
APITD1	-0.29762	8.4981	-3.6361	0.00061006	0.0033142	-0.72299
ZNF204	-0.34833	6.4291	-3.6358	0.00061066	0.0033155	-0.72391
PRPH	-0.32689	7.3642	-3.6353	0.00061153	0.0033158	-0.72524
TGFB1	0.2284	6.122	3.6353	0.00061153	0.0033158	-0.72524
SPG20	-0.21241	9.1109	-3.6352	0.00061179	0.0033158	-0.72564
CYTIP	0.72185	6.532	3.635	0.00061227	0.0033164	-0.72637
MGP	0.3459	11.991	3.6333	0.00061538	0.0033294	-0.73111
YWHAB	0.26175	10.521	3.6333	0.00061539	0.0033294	-0.73113
NARG1	0.41524	5.8763	3.6322	0.00061749	0.0033388	-0.73432
ARMCX2	-0.33981	9.5452	-3.6316	0.00061875	0.0033436	-0.73623
NEUROD6	-0.20645	6.4155	-3.6294	0.0006229	0.0033641	-0.74248
PDZD3	-0.2935	6.9339	-3.6292	0.00062342	0.003365	-0.74327
SNRNP35	0.26142	8.7453	3.6282	0.0006254	0.0033736	-0.74623
AMHR2	-0.33246	6.6759	-3.6274	0.0006269	0.0033798	-0.74848
FAM189A2	0.37156	7.6891	3.6272	0.00062735	0.0033802	-0.74915
CD37	0.42167	5.6165	3.6256	0.00063048	0.0033934	-0.75381
PFDN1	0.19245	9.6153	3.6252	0.00063126	0.0033934	-0.75496
TXN	-0.31122	9.7527	-3.6253	0.00063104	0.0033934	-0.75463
LOC646808	0.25852	6.1419	3.6255	0.00063066	0.0033934	-0.75407
GRIN2A	-0.22805	6.2612	-3.6241	0.00063328	0.0034022	-0.75795
UMOD	-1.7172	11.08	-3.6238	0.00063401	0.0034022	-0.75903
FAM162A	-0.18818	10.909	-3.6239	0.0006338	0.0034022	-0.75871
EFHA1	-0.24354	10.415	-3.6231	0.00063532	0.0034072	-0.76097
SMC4	0.41537	7.4861	3.6219	0.00063765	0.0034177	-0.76438
GAR1	0.2432	9.2833	3.6216	0.00063842	0.0034199	-0.76551
COX8A	-0.19137	11.703	-3.6192	0.00064305	0.0034427	-0.77228
DECR2	-0.42809	9.2618	-3.6181	0.00064534	0.0034529	-0.77561
YARS	0.22406	10.075	3.6177	0.00064621	0.0034556	-0.77686
PFKFB2	-0.25954	6.294	-3.6168	0.0006479	0.003459	-0.77932
PHKA1	-0.21829	7.0078	-3.6168	0.00064791	0.003459	-0.77932
PNLIPRP1	-0.26989	6.2732	-3.6168	0.00064798	0.003459	-0.77943
LPHN2	0.44143	8.5919	3.6151	0.0006513	0.0034747	-0.78421
SGPP1	-0.46011	6.801	-3.6146	0.00065234	0.0034782	-0.78569
YKT6	0.16276	7.9078	3.6144	0.00065291	0.0034793	-0.78651
AFTPH	-0.30858	10.014	-3.6141	0.00065348	0.0034803	-0.78733
FXN	0.26801	6.1904	3.6132	0.00065527	0.0034858	-0.78989
PLA2R1	-0.39074	9.998	-3.6133	0.00065513	0.0034858	-0.78969
DAAM2	0.35379	9.5662	3.6122	0.00065724	0.0034943	-0.7927
N6AMT1	0.23306	7.2455	3.612	0.00065761	0.0034943	-0.79323
KIAA1772	-0.2731	6.5315	-3.6104	0.00066101	0.0035103	-0.79805
RAB11A	0.17991	10.48	3.609	0.00066385	0.0035213	-0.80206
KIF20A	0.54023	5.6272	3.6092	0.00066348	0.0035213	-0.80154
C9orf114	0.21151	7.2864	3.6056	0.00067084	0.0035563	-0.81185
GDF3	-0.21618	6.0238	-3.6029	0.0006766	0.0035848	-0.81986
CLN8	0.26057	5.8381	3.601	0.0006807	0.0036044	-0.8255
ACVRL1	0.28127	6.919	3.5994	0.0006839	0.0036193	-0.8299
ARRB1	0.2714	6.8691	3.5987	0.00068552	0.0036237	-0.83211
FGF6	-0.16041	6.5029	-3.5987	0.0006855	0.0036237	-0.83207
TINAGL1	0.21646	7.6177	3.5978	0.00068739	0.0036316	-0.83466
RAD23B	-0.25619	10.21	-3.5974	0.00068836	0.0036328	-0.83597
LRFN3	0.32151	5.7267	3.5973	0.00068842	0.0036328	-0.83605
ST7	-0.23919	7.6959	-3.5951	0.00069314	0.0036536	-0.84245
RABEP2	0.16577	7.4843	3.5952	0.00069298	0.0036536	-0.84222
LRRC36	-0.20596	6.7173	-3.5946	0.00069436	0.0036579	-0.84409
EIF3G	0.25226	10.892	3.5934	0.00069676	0.0036684	-0.84732
PRL	-0.23371	5.6051	-3.5896	0.0007052	0.0037107	-0.85858
UBXN1	0.18077	6.7784	3.5894	0.00070559	0.0037107	-0.85909
AP2S1	0.30783	9.3029	3.5878	0.00070907	0.0037226	-0.86368
MAP2K3	-0.29287	7.5944	-3.5881	0.00070832	0.0037226	-0.8627
ZNF219	-0.1797	7.275	-3.5879	0.00070895	0.0037226	-0.86353
C1R	0.38551	10.135	3.5876	0.00070951	0.0037228	-0.86427
PLUNC	-0.3289	6.6552	-3.5871	0.00071066	0.0037267	-0.86578
HCFC2	0.28018	6.8319	3.5856	0.000714	0.0037421	-0.87016
AP1S2	0.39339	9.6489	3.5853	0.00071463	0.0037433	-0.87099
EVC	-0.21727	6.9926	-3.5831	0.00071959	0.0037661	-0.87745
DNAJB2	0.27602	9.6077	3.583	0.00071981	0.0037661	-0.87775
SCARF1	0.28124	4.9636	3.5798	0.00072692	0.0038012	-0.88693
TRAV8-6	-0.25904	6.5712	-3.5791	0.00072844	0.003807	-0.88888
IL2RA	-0.18867	5.5942	-3.5789	0.00072889	0.0038072	-0.88946
CLIC2	0.40102	7.4142	3.5785	0.00072977	0.0038096	-0.89059
MCC	-0.26989	7.0322	-3.5773	0.00073247	0.0038215	-0.89404
LSM2	0.25828	7.1366	3.5768	0.00073372	0.0038259	-0.89563
MOSC1	-0.24381	8.3969	-3.5763	0.00073474	0.003829	-0.89693
CLIP3	-0.32377	9.6314	-3.5759	0.00073579	0.0038324	-0.89827
GOT1	-0.47234	9.1214	-3.575	0.00073782	0.0038396	-0.90083
PTDSS1	-0.21927	11.736	-3.5749	0.00073802	0.0038396	-0.9011
OR5I1	-0.30518	5.438	-3.5728	0.0007428	0.0038617	-0.90713
EPB41L4B	-0.4289	6.1142	-3.5727	0.0007431	0.0038617	-0.9075
KIAA1609	0.29575	6.7138	3.5721	0.0007445	0.0038668	-0.90926
SMARCD3	0.39353	8.1689	3.5716	0.00074549	0.003869	-0.9105
HARS2	0.21835	8.4127	3.5715	0.00074577	0.003869	-0.91086
C1orf105	-0.34461	6.3293	-3.5701	0.00074917	0.0038845	-0.9151
ABCA5	-0.26039	6.1415	-3.5691	0.00075147	0.0038942	-0.91797
MDK	0.24684	5.9345	3.5656	0.00075958	0.003934	-0.928
GRB2	0.17825	8.3518	3.5651	0.00076081	0.0039382	-0.92952
LOH3CR2A	-0.3362	6.3085	-3.5642	0.00076292	0.0039469	-0.9321
SEMA6D	-0.19709	6.3545	-3.5616	0.00076903	0.0039763	-0.93955
RGSL2	-0.25542	5.8096	-3.5605	0.0007717	0.0039878	-0.94278
HOXC5	0.14929	6.5368	3.5596	0.00077384	0.0039967	-0.94538
DFFB	0.31311	5.3875	3.5583	0.00077692	0.0040103	-0.94909
LAMC1	0.26292	9.4055	3.5581	0.00077736	0.0040103	-0.94961
PPARGC1A	-0.67069	7.3077	-3.5571	0.00077988	0.0040211	-0.95264
KLK1	-1.02	7.7975	-3.5561	0.00078218	0.004023	-0.95539
TMEM87A	0.20723	9.508	3.5562	0.00078195	0.004023	-0.95512
G0S2	-0.51884	10.479	-3.5563	0.0007816	0.004023	-0.9547
CEND1	-0.19955	7.2644	-3.5566	0.00078093	0.004023	-0.95389
FGGY	-0.34821	8.2867	-3.556	0.00078242	0.004023	-0.95568
GJA5	0.36944	6.4477	3.5543	0.00078667	0.004038	-0.96074
NHLH1	-0.2679	7.0818	-3.5544	0.00078633	0.004038	-0.96034
UTP6	0.34294	8.5364	3.5546	0.00078595	0.004038	-0.95987
NR3C1	0.42065	9.5597	3.5529	0.00079004	0.0040531	-0.96473
HYAL2	0.48503	9.8931	3.5521	0.00079186	0.0040579	-0.96687
C1orf61	-0.26257	7.2669	-3.5523	0.00079148	0.0040579	-0.96643
TSPYL4	-0.27497	10.356	-3.5511	0.00079428	0.004068	-0.96973
TRIM48	-0.48909	6.7303	-3.5506	0.00079554	0.0040722	-0.9712
CDH9	-0.2056	5.1812	-3.5495	0.00079835	0.0040844	-0.9745
HAND1	-0.25338	5.883	-3.5474	0.00080351	0.0041085	-0.98052
CHRM2	-0.32813	5.6322	-3.5468	0.00080502	0.0041139	-0.98226
PAK4	-0.20447	8.8463	-3.5464	0.00080591	0.0041162	-0.9833
PLA2G2D	-0.34368	7.1559	-3.546	0.00080689	0.0041189	-0.98443
RCBTB1	0.47752	8.3764	3.5458	0.00080733	0.0041189	-0.98495
ADAM10	0.37621	6.2263	3.545	0.00080944	0.0041226	-0.98738
IL10RB	0.3438	7.643	3.545	0.00080939	0.0041226	-0.98732
KDM6B	-0.18122	7.1645	-3.5448	0.00080989	0.0041226	-0.9879
BANK1	-0.40902	7.1606	-3.5447	0.0008103	0.0041226	-0.98837
ZNF696	0.28202	6.0534	3.5449	0.00080958	0.0041226	-0.98754
GYPC	0.29574	8.9419	3.5438	0.00081246	0.0041302	-0.99086
ZMYM3	-0.27768	8.7464	-3.5435	0.00081314	0.0041302	-0.99164
MED6	0.35456	5.8813	3.5437	0.00081283	0.0041302	-0.99128
POLG	0.26324	6.9508	3.5425	0.0008156	0.0041404	-0.99446
SOAT1	0.35382	5.7366	3.5421	0.00081672	0.0041438	-0.99574
TCF4	0.71882	6.7336	3.5408	0.00082011	0.0041587	-0.99961
SEMA4D	-0.39272	7.7826	-3.5403	0.00082117	0.0041618	-1.0008
MRPL23	0.39395	8.2495	3.5397	0.00082279	0.0041677	-1.0027
ZNF22	0.19304	9.3629	3.539	0.0008246	0.0041746	-1.0047
INPP5J	-0.30886	7.1558	-3.5386	0.0008257	0.0041779	-1.0059
PCNA	0.22184	9.757	3.5378	0.00082757	0.0041851	-1.0081
IL1F6	-0.15294	5.7147	-3.5376	0.00082824	0.0041862	-1.0088
CRYZ	-0.46441	10.81	-3.5368	0.00083015	0.0041912	-1.011
PIP4K2A	0.19794	5.6571	3.5369	0.0008298	0.0041912	-1.0106
MLF1	-0.3771	7.9542	-3.5348	0.0008352	0.0042103	-1.0166
ANKRD28	-0.21367	9.8251	-3.5348	0.00083531	0.0042103	-1.0167
NIP7	0.34997	5.6929	3.5349	0.00083504	0.0042103	-1.0164
SFPQ	0.23552	9.223	3.5344	0.00083638	0.0042134	-1.0179
MSH5	-0.29054	6.0274	-3.5335	0.00083857	0.0042222	-1.0204
DDB2	0.34746	7.7206	3.5325	0.00084123	0.004231	-1.0233
MYL9	-0.31808	11.695	-3.5326	0.0008409	0.004231	-1.023
SERPINF2	-0.48492	7.2191	-3.5318	0.000843	0.0042375	-1.0253
RWDD2A	0.35026	6.8389	3.5315	0.00084382	0.0042393	-1.0262
ENOPH1	-0.25951	9.9085	-3.5312	0.00084454	0.0042406	-1.027
AGT	-0.84835	7.9108	-3.5302	0.00084728	0.0042485	-1.03
KEL	-0.2198	7.5097	-3.5301	0.00084749	0.0042485	-1.0303
SPON2	0.68163	8.7862	3.5303	0.00084706	0.0042485	-1.0298
SLC29A2	-0.17628	5.0719	-3.5294	0.00084937	0.0042556	-1.0323
FEV	-0.29623	7.0625	-3.5279	0.00085328	0.0042705	-1.0366
TMEM57	0.24905	6.3838	3.5275	0.0008542	0.0042705	-1.0376
ANKRD57	-0.6018	7.6995	-3.5279	0.00085335	0.0042705	-1.0367
C11orf63	-0.35818	6.946	-3.5276	0.000854	0.0042705	-1.0374
COX4NB	0.20534	9.107	3.5273	0.00085492	0.0042718	-1.0384
GRHPR	-0.23523	10.693	-3.5268	0.00085614	0.0042733	-1.0397
UNC119B	-0.17793	10.832	-3.5269	0.00085588	0.0042733	-1.0395
BMPR1B	-0.2439	5.2596	-3.526	0.00085827	0.0042816	-1.0421
RBBP8	-0.48336	9.5112	-3.5257	0.00085912	0.0042835	-1.043
HEATR6	0.33428	7.1089	3.5254	0.0008599	0.0042851	-1.0438
SCCPDH	-0.18356	9.152	-3.5246	0.00086201	0.0042933	-1.0461
FBXO17	-0.42869	9.1562	-3.5239	0.00086391	0.0043004	-1.0482
LAIR1	0.44116	7.3248	3.5225	0.00086757	0.0043143	-1.0521
NR2F1	-0.22951	7.7256	-3.5224	0.0008679	0.0043143	-1.0525
AARSD1	0.30751	7.2253	3.5223	0.0008681	0.0043143	-1.0527
ZNF562	0.3299	6.9188	3.5214	0.00087043	0.0043235	-1.0552
ALDH9A1	-0.22954	12.107	-3.5209	0.00087177	0.0043279	-1.0566
C1orf9	-0.24434	9.2634	-3.5198	0.00087484	0.0043408	-1.0599
SNX1	0.1727	9.3583	3.519	0.00087681	0.0043482	-1.062
CA7	-0.25932	6.4625	-3.518	0.00087947	0.0043556	-1.0648
RNF24	0.24165	7.3122	3.518	0.00087972	0.0043556	-1.0651
STMN4	-0.2485	6.3232	-3.518	0.00087967	0.0043556	-1.065
GDF9	-0.24527	6.1969	-3.5174	0.00088129	0.0043587	-1.0668
NXPH4	-0.20084	6.2795	-3.5174	0.00088125	0.0043587	-1.0667
LASS6	-0.42743	9.2958	-3.517	0.00088239	0.0043618	-1.0679
AXIN1	-0.23297	8.3792	-3.5141	0.00089026	0.0043983	-1.0762
HLA-E	0.29607	12.198	3.5136	0.00089158	0.0044001	-1.0776
MIOS	0.21635	8.5892	3.5136	0.00089146	0.0044001	-1.0775
IMPA2	-0.62358	10.355	-3.5127	0.00089408	0.0044078	-1.0802
PPEF1	-0.21588	5.0073	-3.5128	0.00089378	0.0044078	-1.0799
PGS1	0.26741	8.7152	3.5123	0.00089518	0.0044085	-1.0813
HEPH	0.48784	7.1912	3.5123	0.00089501	0.0044085	-1.0812
C7orf42	0.25471	9.583	3.5119	0.00089617	0.0044095	-1.0824
SENP5	0.18214	5.3084	3.5118	0.00089635	0.0044095	-1.0826
GDF15	-1.0243	7.2028	-3.509	0.00090409	0.0044451	-1.0906
TRMT61B	-0.30173	8.569	-3.5089	0.00090454	0.0044451	-1.091
GGT5	0.36231	6.505	3.5085	0.0009055	0.0044474	-1.092
BNIP3L	-0.24295	10.399	-3.5072	0.00090935	0.004464	-1.096
SLC35C1	0.18951	6.9997	3.5069	0.00091016	0.0044655	-1.0968
ADAM17	0.26325	6.3012	3.5066	0.00091078	0.0044662	-1.0975
SF3B4	-0.28736	8.4066	-3.5064	0.00091148	0.0044673	-1.0982
SOSTDC1	0.76818	7.9879	3.5061	0.00091242	0.0044695	-1.0991
HRAS	0.3173	8.9203	3.5053	0.00091458	0.0044777	-1.1013
RNASE6	0.82413	7.1381	3.5033	0.00092004	0.004502	-1.1069
ATP6V0E2	-0.3809	9.553	-3.5031	0.00092062	0.0045025	-1.1075
UHRF1BP1L	-0.30698	6.9624	-3.5028	0.00092155	0.0045047	-1.1084
RPS6KB2	0.21109	7.1272	3.5019	0.00092408	0.0045138	-1.111
SGK2	-0.44548	7.0516	-3.5018	0.0009244	0.0045138	-1.1113
PMP22	0.47194	9.8197	3.5005	0.00092817	0.0045298	-1.1151
PDZD2	-0.4229	7.5902	-3.5001	0.00092927	0.0045328	-1.1162
ELK3	0.22006	6.0362	3.4995	0.00093092	0.0045341	-1.1178
LDB2	0.46171	10.865	3.4996	0.00093061	0.0045341	-1.1175
LRRC61	-0.25142	7.8193	-3.4995	0.00093102	0.0045341	-1.118
CASD1	-0.30585	7.9742	-3.4989	0.00093272	0.00454	-1.1196
BZRPL1	-0.19984	5.7226	-3.4985	0.00093367	0.0045422	-1.1206
CEL	-0.35875	5.8554	-3.4977	0.00093616	0.0045519	-1.1231
VAV1	0.38367	6.0169	3.4955	0.00094228	0.0045793	-1.1292
SLC3A1	-0.79456	11.319	-3.4952	0.00094314	0.004581	-1.13
MR1	0.20049	6.4485	3.4918	0.00095301	0.0046265	-1.1397
CALCOCO1	-0.28851	9.6153	-3.4915	0.00095396	0.0046287	-1.1406
EPS8L2	-0.35879	8.6633	-3.4906	0.00095656	0.0046389	-1.1432
LMNB1	0.31766	5.0545	3.4887	0.00096224	0.004664	-1.1487
UNC119	-0.25526	9.4779	-3.4882	0.00096377	0.0046689	-1.1502
COL16A1	0.50309	5.6379	3.4868	0.00096778	0.0046834	-1.154
PLA2G4A	0.58	5.1736	3.4869	0.00096759	0.0046834	-1.1539
YIPF1	0.20168	8.9477	3.4865	0.00096862	0.004685	-1.1549
WDR12	0.25428	8.6233	3.4861	0.00096984	0.0046856	-1.156
THOC6	0.34049	5.9236	3.4861	0.0009699	0.0046856	-1.1561
CCDC130	0.20045	7.7075	3.486	0.00097026	0.0046856	-1.1564
FASTKD1	0.22014	9.4961	3.4857	0.00097119	0.0046877	-1.1573
GCHFR	-0.41971	7.7503	-3.4854	0.00097209	0.0046895	-1.1582
STK17B	0.34098	5.7338	3.4851	0.00097287	0.0046895	-1.1589
SH3GLB1	0.23844	9.8827	3.485	0.00097311	0.0046895	-1.1592
CIDEB	-0.3869	8.2086	-3.4836	0.00097731	0.0047057	-1.1632
PHF10	-0.33853	9.336	-3.4836	0.00097749	0.0047057	-1.1634
FCN3	0.77832	11.439	3.4832	0.00097858	0.0047085	-1.1644
DZIP3	-0.18279	6.9818	-3.4824	0.0009808	0.0047167	-1.1665
XPNPEP1	0.20179	9.1505	3.4805	0.00098653	0.0047394	-1.1719
SLC7A7	-0.5995	11.317	-3.4805	0.00098654	0.0047394	-1.1719
CD163	1.1214	7.6316	3.4787	0.00099205	0.0047634	-1.1771
IMPACT	-0.22388	7.4377	-3.4784	0.00099296	0.0047653	-1.178
RPL26P36	-0.31848	9.534	-3.4775	0.00099579	0.0047764	-1.1806
HOXD11	0.18608	5.7752	3.4756	0.0010017	0.004802	-1.1861
ARHGAP26	0.17709	5.4922	3.4746	0.0010044	0.0048129	-1.1887
FAM179B	-0.335	8.78	-3.4741	0.0010061	0.0048183	-1.1902
CPN2	-0.44489	6.6283	-3.4737	0.0010073	0.0048189	-1.1913
NBR2	0.42273	6.5024	3.4738	0.0010071	0.0048189	-1.1911
FSCN3	-0.36772	6.2258	-3.473	0.0010094	0.0048264	-1.1933
FAM168B	-0.18808	11.342	-3.4724	0.0010113	0.0048333	-1.1951
ARL4C	0.66186	6.8144	3.4717	0.0010136	0.0048418	-1.1972
KLK11	-0.2109	5.381	-3.4713	0.0010147	0.0048444	-1.1982
SDHC	-0.31636	9.5589	-3.4703	0.0010178	0.0048541	-1.201
C16orf58	-0.18645	7.8856	-3.4704	0.0010176	0.0048541	-1.2008
ZNF267	0.35579	6.5352	3.4693	0.0010209	0.0048665	-1.2039
GTPBP8	0.24186	7.877	3.4685	0.0010234	0.0048758	-1.2061
ABP1	-1.3234	9.286	-3.4682	0.0010243	0.0048776	-1.2069
EIF2B5	0.28061	8.6887	3.4679	0.0010254	0.0048801	-1.2079
HOXB1	-0.22775	6.591	-3.4671	0.0010279	0.004887	-1.2102
BTN3A2	0.58663	8.3387	3.4673	0.0010274	0.004887	-1.2097
LETM1	-0.28251	6.8477	-3.4666	0.0010293	0.0048889	-1.2115
TNNT2	-0.55852	11.279	-3.4668	0.0010289	0.0048889	-1.2111
ACCN4	-0.17645	5.8424	-3.4656	0.0010325	0.0049012	-1.2143
ECT2	0.43774	5.38	3.4642	0.0010371	0.0049205	-1.2185
CD302	0.30387	8.8197	3.4634	0.0010395	0.0049295	-1.2206
DRAM1	0.31744	9.3603	3.4614	0.0010457	0.0049565	-1.2262
LSM8	0.21958	6.2273	3.4606	0.0010485	0.0049647	-1.2287
MYOZ1	-0.41991	9.1713	-3.4607	0.0010482	0.0049647	-1.2284
CR1	-0.36921	7.4512	-3.4594	0.0010523	0.0049799	-1.232
MTHFD2	-0.39032	10.502	-3.4591	0.0010532	0.0049819	-1.2329
BTN3A1	0.27014	7.1317	3.4586	0.0010548	0.0049868	-1.2343
IFNA7	-0.2407	6.7132	-3.458	0.0010569	0.004994	-1.2361
CCKBR	-0.23112	5.4697	-3.4572	0.0010592	0.0050022	-1.2381
DDX58	0.5735	6.3791	3.4548	0.001067	0.005036	-1.245
UBE2Q1	-0.28027	10.509	-3.4547	0.0010674	0.005036	-1.2453
IL15	0.32333	5.5537	3.4544	0.0010682	0.0050374	-1.246
PSG2	-0.35858	5.9522	-3.4538	0.0010704	0.0050452	-1.248
MAMLD1	-0.26455	7.5388	-3.4534	0.0010718	0.0050467	-1.2491
AMN	-0.2126	6.9004	-3.4533	0.0010718	0.0050467	-1.2492
UNG	-0.29042	9.0651	-3.453	0.001073	0.0050494	-1.2502
NSBP1	-0.19122	6.1236	-3.4526	0.0010742	0.0050526	-1.2512
KIAA0895	-0.21375	5.9194	-3.4519	0.0010766	0.0050614	-1.2533
RFC2	0.24657	6.2278	3.4502	0.001082	0.0050842	-1.258
DNASE1	-0.29488	5.545	-3.4499	0.0010829	0.0050858	-1.2588
EVL	-0.38429	8.829	-3.4493	0.0010849	0.0050926	-1.2605
RHEB	-0.16698	9.554	-3.4488	0.0010869	0.0050992	-1.2621
SPINK5	-0.37514	6.2475	-3.4485	0.0010878	0.0051007	-1.2629
BPTF	-0.23357	8.7805	-3.4481	0.0010889	0.0051033	-1.2639
OR10H3	-0.36006	5.7494	-3.4475	0.001091	0.0051107	-1.2657
RPA3	-0.18835	9.2108	-3.4469	0.0010931	0.0051178	-1.2674
F9	-0.24086	4.9694	-3.4459	0.0010963	0.0051302	-1.2702
SLC16A3	0.33048	6.5364	3.4443	0.0011018	0.005151	-1.2749
REXO4	0.27787	7.9852	3.4443	0.0011017	0.005151	-1.2747
RBP4	-1.2146	7.8375	-3.4435	0.0011045	0.0051606	-1.2771
GDF5	-0.28394	7.1067	-3.4427	0.0011072	0.0051706	-1.2794
DARC	0.25572	6.2144	3.4423	0.0011085	0.0051717	-1.2805
LEPREL2	0.27294	5.7672	3.4424	0.001108	0.0051717	-1.2801
IL16	0.20418	6.2076	3.4412	0.0011121	0.0051859	-1.2835
TAF1	-0.20461	6.3741	-3.4403	0.0011153	0.0051979	-1.2861
RBM6	0.35684	7.9927	3.4401	0.0011159	0.0051985	-1.2867
KIF1B	-0.32813	9.8078	-3.4383	0.001122	0.005222	-1.2918
C3orf27	-0.22242	6.0907	-3.4382	0.0011221	0.005222	-1.2918
ABTB2	-0.2287	7	-3.4375	0.0011247	0.0052288	-1.294
CNIH4	0.512	8.5769	3.4376	0.0011243	0.0052288	-1.2937
GPD1	-0.46931	8.1243	-3.4369	0.0011268	0.0052315	-1.2957
DBNDD2	0.24058	9.0367	3.4369	0.0011267	0.0052315	-1.2957
FAM182B	-0.2484	6.2313	-3.4368	0.001127	0.0052315	-1.2959
AFP	-0.26347	5.6626	-3.4351	0.0011328	0.0052559	-1.3007
CLEC7A	0.42973	5.7091	3.4348	0.0011339	0.0052583	-1.3016
PRDM5	-0.19278	5.8386	-3.4338	0.0011374	0.0052719	-1.3044
TRBV5-2	-0.18752	5.4249	-3.4335	0.0011384	0.0052738	-1.3052
OSBPL10	-0.32273	8.1377	-3.4323	0.0011425	0.0052902	-1.3086
EZR	-0.36025	9.0422	-3.4313	0.0011461	0.0053042	-1.3115
GOLT1B	0.45454	7.3555	3.4308	0.0011476	0.0053085	-1.3128
CDC20	0.59411	5.5632	3.4302	0.0011498	0.0053157	-1.3145
FAM50A	0.32011	8.9245	3.4301	0.0011503	0.0053157	-1.3149
CALML3	-0.53038	6.7498	-3.4299	0.001151	0.0053161	-1.3155
BTBD2	-0.23799	7.0937	-3.4295	0.0011522	0.005319	-1.3165
DST	-0.24616	8.3746	-3.4291	0.0011536	0.0053219	-1.3176
RHD	-0.18505	6.0411	-3.429	0.001154	0.0053219	-1.3179
[truncated: 1,814 more rows]

## Sheet: DEGs of GSE104948
DEGs	logFC	AveExpr	t	P.Value	adj.P.Val	B
FCN1	2.3818	7.6693	9.892	1.642e-12	7.2414e-10	18.407
LYZ	2.3569	8.4015	7.2085	7.5455e-09	2.9736e-07	10.167
HBB	2.3052	10.436	4.6545	3.2718e-05	0.00025229	2.0058
TYROBP	2.2885	8.1015	8.8759	3.6467e-11	6.0308e-09	15.383
CX3CR1	2.21	7.9719	9.4118	6.9975e-12	1.9638e-09	16.994
C1QB	2.1321	6.6922	5.9596	4.6244e-07	7.7165e-06	6.1435
C1QA	2.097	7.1988	6.0631	3.2849e-07	5.9071e-06	6.4773
COL1A2	2.0537	8.3208	5.8733	6.1495e-07	9.8021e-06	5.8654
HCK	2.0295	7.2261	9.5306	4.8759e-12	1.4566e-09	17.346
CD53	1.9178	9.1547	8.7504	5.3932e-11	8.0559e-09	15.001
COL6A3	1.9079	7.2655	4.8982	1.4966e-05	0.000131	2.762
CD52	1.8751	6.8269	7.5079	2.8433e-09	1.3786e-07	11.122
ITGB2	1.8653	7.3557	8.9555	2.8469e-11	5.3807e-09	15.625
CD48	1.8597	7.776	9.7261	2.7007e-12	9.2632e-10	17.922
IL10RA	1.8398	7.1601	9.9749	1.2824e-12	6.0549e-10	18.648
PLAC8	1.81	6.3501	8.0743	4.5789e-10	3.5045e-08	12.909
NCF2	1.7951	7.4294	7.1906	8.0019e-09	3.1026e-07	10.11
FCER1G	1.7781	8.508	10.246	5.7491e-13	3.2046e-10	19.428
C3	1.7694	8.4257	4.2592	0.00011382	0.00069056	0.80572
PHLDA2	1.7689	5.9707	7.2172	7.3341e-09	2.9151e-07	10.195
TGFBI	1.7662	8.7607	6.7234	3.7112e-08	1.0168e-06	8.6084
CSTA	1.7451	6.3024	7.9475	6.875e-10	4.7163e-08	12.512
HTR2B	1.6854	6.466	5.3502	3.4394e-06	3.9901e-05	4.1888
PYCARD	1.6659	7.3873	9.7751	2.3308e-12	8.9941e-10	18.066
EVI2A	1.6561	6.7384	6.2861	1.5719e-07	3.2936e-06	7.1972
LAPTM5	1.6261	9.2792	8.4152	1.5481e-10	1.7454e-08	13.97
CD36	1.6156	5.4193	6.4383	9.5064e-08	2.201e-06	7.6887
NNMT	1.5964	7.3547	4.3968	7.4006e-05	0.00048955	1.2193
CYBB	1.5855	6.5266	8.1985	3.0804e-10	2.6172e-08	13.297
IFI30	1.5808	10.749	8.2723	2.4357e-10	2.2557e-08	13.527
CD14	1.5793	8.6178	8.1808	3.259e-10	2.6948e-08	13.242
MS4A4A	1.5761	5.7111	4.3663	8.1442e-05	0.00052818	1.1272
MNDA	1.5467	7.3205	5.3898	3.0208e-06	3.582e-05	4.315
ADAMTS1	1.5402	8.7442	8.2176	2.8986e-10	2.4855e-08	13.357
HLX	1.5173	8.025	12.021	3.7926e-15	5.0176e-12	24.29
EVI2B	1.5148	6.7218	5.6467	1.2988e-06	1.8335e-05	5.1366
VSIG4	1.5037	7.5313	4.4942	5.4446e-05	0.00038249	1.5147
TAGLN	1.4927	8.9599	7.0931	1.1011e-08	3.9833e-07	9.7972
NETO2	1.4878	7.5665	9.2635	1.1011e-11	2.8325e-09	16.552
PTX3	1.4834	4.8087	4.788	2.1343e-05	0.00017523	2.4185
CCL4	1.4811	8.3892	6.5705	6.1436e-08	1.5253e-06	8.1155
MS4A6A	1.4636	7.9673	6.0457	3.4793e-07	6.145e-06	6.4212
CTSS	1.4596	7.2221	6.8809	2.2092e-08	6.8887e-07	9.1159
POSTN	1.4403	10.771	6.2308	1.8869e-07	3.7989e-06	7.0187
CSF1R	1.4394	7.9998	8.4547	1.3663e-10	1.6432e-08	14.092
RRM2	1.4343	5.3079	4.3809	7.7806e-05	0.00051031	1.1711
FN1	1.4316	8.0192	6.1144	2.7729e-07	5.1156e-06	6.6427
TLR2	1.4187	7.4775	6.6261	5.1136e-08	1.3416e-06	8.2949
LY96	1.4101	7.2003	8.34	1.9645e-10	1.9905e-08	13.737
LTF	1.4025	7.6765	4.3235	9.3143e-05	0.0005876	0.9982
DOCK2	1.3783	6.3204	8.2378	2.7174e-10	2.3967e-08	13.42
C3AR1	1.3735	7.732	5.8532	6.5718e-07	1.0351e-05	5.8007
HCLS1	1.3677	9.3124	10.341	4.3431e-13	3.094e-10	19.701
RAC2	1.3531	8.6048	8.8376	4.109e-11	6.5609e-09	15.266
ACTA2	1.3339	10.596	6.583	5.8949e-08	1.4998e-06	8.1559
CFD	1.3244	7.0258	6.4561	8.9626e-08	2.1013e-06	7.7462
S100A8	1.3076	9.5449	3.3538	0.0017039	0.0061398	-1.7652
ADGRE5	1.3037	7.8921	12.163	2.5869e-15	3.993e-12	24.658
GZMA	1.2996	6.3037	6.1629	2.3618e-07	4.5006e-06	6.7994
TNFRSF1B	1.2788	6.9519	8.6122	8.3168e-11	1.1327e-08	14.577
CORO1A	1.2749	6.9227	7.7324	1.3741e-09	8.0199e-08	11.834
RNASE6	1.2717	7.1751	4.6024	3.8631e-05	0.00028882	1.8455
ISG15	1.2592	9.3079	4.0749	0.00020126	0.0010951	0.25975
IDO1	1.253	7.8088	3.9694	0.00027776	0.001422	-0.047991
LST1	1.2455	7.427	8.4948	1.2039e-10	1.5066e-08	14.216
PLK2	1.2454	7.9518	6.8612	2.3574e-08	7.1345e-07	9.0523
TMSB15A	1.2415	9.1673	4.4027	7.265e-05	0.00048299	1.2371
GBP2	1.2404	8.0505	9.8213	2.0289e-12	8.1694e-10	18.201
FABP4	1.2341	8.7665	5.3199	3.7982e-06	4.2949e-05	4.0923
AOAH	1.2288	6.2661	8.3312	2.0198e-10	1.9905e-08	13.71
CD163	1.2271	6.2246	3.5568	0.00094979	0.0037937	-1.2152
ITGAM	1.2231	6.7213	5.9443	4.8642e-07	8.0586e-06	6.0942
GPR65	1.2173	6.3186	7.7591	1.2606e-09	7.5576e-08	11.918
MARCO	1.2159	6.1688	4.9282	1.3585e-05	0.00012156	2.8557
LILRB2	1.2089	5.1408	6.7946	2.9352e-08	8.5482e-07	8.8379
SCG5	1.2064	6.1115	3.8441	0.0004057	0.0019228	-0.40895
ISG20	1.2039	7.3652	5.8673	6.273e-07	9.9476e-06	5.846
LYPD1	1.2032	6.2289	4.3035	9.9145e-05	0.00061914	0.93823
C8orf4	1.203	9.3762	9.6189	3.731e-12	1.1518e-09	17.607
UCP2	1.1848	8.39	8.8848	3.5467e-11	5.972e-09	15.41
PTPRC	1.1825	6.3147	6.3798	1.1535e-07	2.5555e-06	7.4996
TLR1	1.1789	5.3271	6.4261	9.8967e-08	2.2856e-06	7.6493
LPAR6	1.1787	10.009	10.787	1.1904e-13	1.1024e-10	20.957
LYN	1.177	7.5901	7.2478	6.637e-09	2.6841e-07	10.293
CRIP1	1.1676	8.066	9.1191	1.7165e-11	3.9451e-09	16.119
IGFBP6	1.1599	7.9715	4.9486	1.2716e-05	0.00011478	2.9197
CD300A	1.1561	6.6866	7.2191	7.2882e-09	2.9093e-07	10.201
APOBEC3B	1.1555	5.1154	5.1934	5.7422e-06	5.9953e-05	3.6908
APOBEC3A	1.1497	6.4705	3.9082	0.00033447	0.0016485	-0.22512
COL5A2	1.146	6.1854	5.6538	1.2686e-06	1.7992e-05	5.1595
S100A4	1.1448	10.74	8.243	2.6734e-10	2.3806e-08	13.436
MICB	1.1433	8.1232	8.383	1.7143e-10	1.8089e-08	13.87
IGSF6	1.142	4.9447	5.6029	1.4999e-06	2.019e-05	4.9963
RASSF2	1.1412	7.2016	7.1904	8.0069e-09	3.1026e-07	10.109
CCL2	1.1412	7.2821	3.9521	0.00029277	0.0014861	-0.098201
ECM1	1.1394	9.881	3.4154	0.0014292	0.00529	-1.6001
LCP1	1.1374	8.4833	5.4394	2.5673e-06	3.1511e-05	4.4732
CXCL6	1.1278	5.4625	2.9816	0.0047675	0.014174	-2.7232
CXCR4	1.1222	8.2391	4.9219	1.3862e-05	0.00012368	2.8361
FAM129A	1.119	6.8133	7.0446	1.2905e-08	4.4594e-07	9.6419
P2RY13	1.1149	5.8998	6.6662	4.4808e-08	1.1993e-06	8.4241
BCL2A1	1.1144	5.1547	4.2704	0.00010994	0.00067256	0.83901
IFI44	1.1046	9.0641	5.0545	9.0237e-06	8.5976e-05	3.2522
CYP26B1	1.1044	7.4387	3.7249	0.00057938	0.0025478	-0.74747
HHEX	1.097	6.5248	7.6997	1.5272e-09	8.5716e-08	11.731
DOCK10	1.088	5.6231	7.1799	8.2864e-09	3.1711e-07	10.075
MYO1F	1.0876	7.6846	6.6957	4.0648e-08	1.0975e-06	8.5194
ALOX5	1.0825	5.8859	6.0491	3.4408e-07	6.1143e-06	6.4321
CASP1	1.0804	7.013	8.1812	3.2548e-10	2.6948e-08	13.243
APOC1	1.0785	7.8257	3.9772	0.00027126	0.0013949	-0.025407
PXDN	1.0719	8.834	7.0727	1.1772e-08	4.1453e-07	9.7318
COL1A1	1.0691	5.5512	3.9342	0.0003091	0.0015473	-0.14996
CXCL1	1.0672	6.2656	3.7669	0.00051116	0.0023025	-0.62858
CALHM2	1.0633	7.3665	12.869	3.9837e-16	1.0405e-12	26.456
OAS1	1.0583	9.0112	3.9629	0.00028334	0.0014442	-0.066972
CD44	1.0548	6.792	6.1733	2.2822e-07	4.4067e-06	6.833
GLIPR1	1.0496	6.964	6.2427	1.8144e-07	3.6774e-06	7.057
CCR1	1.0455	6.5399	5.9256	5.1742e-07	8.4362e-06	6.0339
ACTN1	1.0393	7.0905	5.9425	4.8937e-07	8.093e-06	6.0883
FPR3	1.0378	5.9882	4.5021	5.3095e-05	0.00037554	1.5389
CYTIP	1.0366	6.5064	4.578	4.1744e-05	0.00030731	1.7707
CEBPA	1.0309	7.0795	8.0596	4.799e-10	3.6293e-08	12.863
ARPC1B	1.0302	10.114	8.9192	3.1867e-11	5.6133e-09	15.515
COL15A1	1.029	6.9637	3.3119	0.0019185	0.0067632	-1.8763
PPP1R3C	1.0285	9.4739	5.8606	6.4136e-07	1.0136e-05	5.8244
FCGR3B	1.0267	8.5801	3.0412	0.0040594	0.01242	-2.5745
NFKBIE	1.0263	7.2257	8.0582	4.8202e-10	3.6293e-08	12.859
ADGRE2	1.0192	5.4929	6.8063	2.8237e-08	8.3017e-07	8.8758
TIGAR	1.0092	7.2591	7.9971	5.8638e-10	4.2746e-08	12.667
TCIRG1	1.0082	8.6953	7.7774	1.1884e-09	7.193e-08	11.976
SAMSN1	1.0073	5.6967	3.2524	0.0022676	0.0077239	-2.0327
ARL4C	1.0045	6.7453	4.4852	5.6021e-05	0.00039096	1.4872
PSMB10	1.003	9.1513	7.3203	5.238e-09	2.215e-07	10.524
FXYD5	1.0003	8.3029	12.822	4.494e-16	1.0405e-12	26.341
PTGER2	0.98741	6.8292	5.5429	1.8272e-06	2.3935e-05	4.8042
FGR	0.98726	8.1438	6.1492	2.4712e-07	4.6897e-06	6.7552
IRF7	0.98078	7.4063	5.1434	6.7582e-06	6.8476e-05	3.5327
ADA	0.97412	6.439	9.6496	3.4007e-12	1.1248e-09	17.698
COL3A1	0.97063	10.095	4.1645	0.00015272	0.00087645	0.52389
KIF20A	0.9645	5.5709	4.9553	1.2443e-05	0.00011286	2.9408
TNFAIP8	0.96141	7.8679	5.2605	4.612e-06	5.0249e-05	3.9037
MELK	0.95883	5.9828	4.9418	1.3e-05	0.000117	2.8983
CDC20	0.95408	6.0057	4.1016	0.00018539	0.0010232	0.33831
PTPRE	0.95254	7.6101	6.6665	4.4768e-08	1.1993e-06	8.425
LGALS1	0.94607	11.314	7.6574	1.7513e-09	9.4846e-08	11.597
EMP3	0.94504	9.5218	8.1831	3.2349e-10	2.6948e-08	13.249
SOD2	0.94157	7.9793	4.4	7.3269e-05	0.00048571	1.2289
AEBP1	0.94036	8.705	4.067	0.00020619	0.0011173	0.23659
PRC1	0.9366	6.8468	4.7006	2.824e-05	0.00022182	2.1479
C5AR1	0.93597	6.164	3.929	0.00031407	0.001567	-0.16514
SPON2	0.92959	8.7553	4.0634	0.00020845	0.0011269	0.22618
TIMP1	0.92751	11.585	6.2259	1.9181e-07	3.8532e-06	7.0027
SH2B3	0.9268	10.085	9.1135	1.7465e-11	3.9451e-09	16.102
CFB	0.91594	7.4435	3.7394	0.00055488	0.0024576	-0.70648
NT5DC2	0.91465	6.8577	6.2147	1.9904e-07	3.9726e-06	6.9666
IFI35	0.91395	9.2875	5.337	3.5913e-06	4.1213e-05	4.1468
GBP1	0.91227	7.8261	4.1059	0.00018298	0.0010135	0.35081
NMI	0.9099	8.825	8.125	3.8936e-10	3.1085e-08	13.068
PRSS23	0.90977	10.018	4.0832	0.00019616	0.001073	0.28427
TNFRSF12A	0.9043	8.7075	3.7082	0.00060878	0.0026494	-0.79441
MAN2B1	0.90198	8.5053	8.4341	1.4583e-10	1.7314e-08	14.028
TFPI2	0.89544	8.5399	4.1489	0.00016024	0.00091319	0.47786
HK3	0.89526	6.7027	7.0879	1.12e-08	4.0114e-07	9.7805
RGS4	0.89498	6.3785	3.9631	0.00028319	0.0014442	-0.066465
SERPINA3	0.89086	6.8214	2.6635	0.010938	0.027693	-3.4838
NKG7	0.8906	6.2277	5.74	9.5485e-07	1.4171e-05	5.4364
MICALL2	0.88964	7.3628	7.5411	2.5534e-09	1.2791e-07	11.228
PRKCDBP	0.88456	8.1105	5.9282	5.1305e-07	8.3799e-06	6.0422
MX2	0.88091	8.6241	4.1045	0.00018375	0.0010159	0.34679
CKLF	0.87612	8.9012	7.7	1.5258e-09	8.5716e-08	11.731
ARHGAP15	0.87593	7.0545	6.0462	3.4743e-07	6.145e-06	6.4226
PARP12	0.87165	8.9626	7.2313	7.0028e-09	2.8075e-07	10.24
SRPX2	0.86711	5.2236	6.2779	1.6151e-07	3.3569e-06	7.1707
RHOC	0.86443	10.712	8.5418	1.0382e-10	1.3735e-08	14.361
SYT11	0.86207	6.4315	8.3027	2.2109e-10	2.1108e-08	13.621
SERPINH1	0.86198	9.2296	8.3311	2.0204e-10	1.9905e-08	13.709
PYGL	0.8566	7.7195	6.8834	2.1918e-08	6.8574e-07	9.1236
PGF	0.85627	6.3137	5.6996	1.091e-06	1.5762e-05	5.3065
GNLY	0.85419	6.4499	4.4511	6.2393e-05	0.00042612	1.3835
CBR3	0.85417	6.6822	10.258	5.5529e-13	3.2046e-10	19.462
TYMS	0.853	7.8647	3.5497	0.00096972	0.0038572	-1.2348
GATA3	0.85253	7.8506	5.0406	9.4409e-06	8.9399e-05	3.2084
THBD	0.85054	7.6637	5.4684	2.3341e-06	2.9015e-05	4.5659
PBK	0.84857	4.7537	3.8924	0.00035076	0.0017115	-0.27043
SOX17	0.84702	6.6489	7.6347	1.8846e-09	1.003e-07	11.525
CCL5	0.84445	6.1626	5.3873	3.0455e-06	3.6047e-05	4.3071
LY86	0.84352	7.7924	6.182	2.2173e-07	4.3321e-06	6.8611
BMP2	0.84264	9.5043	3.3136	0.0019093	0.0067489	-1.8719
COL4A1	0.84213	10.881	5.7853	8.222e-07	1.2512e-05	5.5822
VEGFC	0.84028	8.1685	4.916	1.4129e-05	0.0001251	2.8176
CCRL2	0.83869	7.2215	6.5798	5.9572e-08	1.5074e-06	8.1456
PCDH12	0.83613	8.9692	6.4185	1.015e-07	2.3153e-06	7.6246
HN1	0.83509	7.7052	6.7295	3.6363e-08	9.9927e-07	8.6284
CDH11	0.83126	6.9812	4.1073	0.00018218	0.0010114	0.355
TWIST1	0.82829	5.5214	7.207	7.5838e-09	2.976e-07	10.162
SRPX	0.82484	7.2188	3.5412	0.00099412	0.0039395	-1.2583
SH3BGRL3	0.82175	9.396	9.2989	9.8796e-12	2.6141e-09	16.658
FAR2	0.81789	7.0349	6.3401	1.315e-07	2.8454e-06	7.3715
GMFG	0.81544	9.0163	8.3116	2.1494e-10	2.0735e-08	13.649
CFP	0.81509	6.755	6.9986	1.501e-08	5.0184e-07	9.494
CEP55	0.81341	4.7063	4.2557	0.00011509	0.0006953	0.79504
CPVL	0.81324	7.72	3.3331	0.0018068	0.0064481	-1.8202
IFITM1	0.8131	11.489	5.0212	1.0052e-05	9.3935e-05	3.1476
LAIR1	0.81275	6.9502	5.9678	4.501e-07	7.5652e-06	6.1699
VCAN	0.81103	6.4485	3.5076	0.0010958	0.0042623	-1.3501
OLFML2B	0.80979	6.7676	3.0934	0.0035214	0.011085	-2.4427
GEM	0.80659	7.9404	4.2703	0.00010995	0.00067256	0.83891
DKK3	0.80651	8.4442	3.4953	0.0011356	0.0043838	-1.3837
COL4A2	0.80557	9.7578	5.6749	1.1834e-06	1.6965e-05	5.2273
SOX18	0.80364	5.96	5.0084	1.0478e-05	9.722e-05	3.1073
LTB	0.80133	6.6964	5.7846	8.2419e-07	1.2513e-05	5.5798
SASH3	0.79813	6.6281	5.9532	4.7242e-07	7.8547e-06	6.1227
NDC80	0.79806	4.8803	6.577	6.0131e-08	1.5113e-06	8.1364
HLA-DQB1	0.79784	8.5686	3.268	0.0021708	0.0074652	-1.992
CPA4	0.79694	6.4483	4.2395	0.00012102	0.00072541	0.74688
PFN1	0.79621	9.2206	3.8643	0.00038177	0.0018347	-0.35109
THEMIS2	0.79348	6.8804	4.6816	3.0009e-05	0.00023413	2.0892
IRF1	0.7927	8.8096	5.632	1.3628e-06	1.8979e-05	5.0897
SLA	0.79201	8.5036	5.9964	4.0953e-07	7.0365e-06	6.2621
MCAM	0.79108	7.4515	8.2637	2.5026e-10	2.2947e-08	13.5
FHL2	0.79032	9.359	4.1977	0.00013779	0.00080663	0.62243
APLNR	0.78845	10.404	4.2783	0.00010726	0.00065915	0.86269
EVA1B	0.78345	8.6248	6.4975	7.8167e-08	1.8852e-06	7.88
FCGR2B	0.78234	5.6999	3.7595	0.00052262	0.0023427	-0.64962
CLEC10A	0.7819	5.6283	5.8487	6.6716e-07	1.0472e-05	5.786
FAM49A	0.78087	5.3762	6.9948	1.5199e-08	5.0452e-07	9.4818
HPSE	0.77982	6.1742	4.1096	0.00018091	0.0010056	0.36169
PLA2G4A	0.7789	5.2736	4.0302	0.00023077	0.0012262	0.12894
CCNB2	0.77883	6.393	4.4483	6.2935e-05	0.00042919	1.3752
NCF4	0.77879	6.3218	4.695	2.8754e-05	0.00022529	2.1305
GZMB	0.77639	6.7056	4.1071	0.00018227	0.0010114	0.35452
LHFPL2	0.77591	7.5453	4.4927	5.4709e-05	0.00038354	1.51
VNN2	0.77456	7.7176	3.7629	0.0005173	0.0023233	-0.63992
QPCT	0.77287	6.1771	4.4967	5.401e-05	0.00038008	1.5224
RASL12	0.77268	6.6877	6.423	9.9995e-08	2.2933e-06	7.6392
SACS	0.7722	6.4943	4.2489	0.00011753	0.00070772	0.77492
ADAP2	0.77034	6.8053	4.9653	1.2048e-05	0.00010993	2.972
IRF8	0.76844	7.8902	4.2449	0.00011902	0.00071576	0.76283
AQP9	0.76783	7.3318	2.73	0.0092311	0.024109	-3.3295
EZH2	0.76771	4.9193	6.4822	8.2242e-08	1.9567e-06	7.8303
CD247	0.76593	6.5339	5.6886	1.131e-06	1.629e-05	5.2713
MSX1	0.76387	6.5748	7.0819	1.142e-08	4.0522e-07	9.7615
CLEC5A	0.76323	4.8047	3.1896	0.0027015	0.0089427	-2.1961
TNC	0.76067	8.2279	3.3472	0.001736	0.0062388	-1.7827
AGTR1	0.75919	9.214	4.258	0.00011425	0.00069244	0.80212
MEF2C	0.75761	8.5974	8.3844	1.7064e-10	1.8089e-08	13.875
FGL2	0.75554	10.074	5.6209	1.4138e-06	1.9436e-05	5.054
PLEKHO2	0.75387	9.0991	9.7424	2.5713e-12	9.1589e-10	17.97
GNA15	0.75203	5.2917	6.2599	1.7138e-07	3.5192e-06	7.1127
IL32	0.75169	7.0668	4.7059	2.7765e-05	0.00021884	2.1643
GZMH	0.75138	6.8525	4.2619	0.00011287	0.00068675	0.81375
THBS2	0.75058	7.0944	3.1488	0.0030246	0.0097702	-2.3013
IER5	0.74994	9.3092	6.3777	1.1614e-07	2.5608e-06	7.4929
PTPN6	0.74699	8.3694	6.8215	2.686e-08	7.9727e-07	8.9247
EPB41L2	0.74636	7.5896	7.5562	2.4311e-09	1.2371e-07	11.276
LCP2	0.74572	6.9099	6.1325	2.6114e-07	4.8857e-06	6.7013
FKBP11	0.7447	8.1908	5.2766	4.3758e-06	4.8129e-05	3.9548
ICAM2	0.74342	10.353	5.7295	9.8851e-07	1.4577e-05	5.4026
TM4SF1	0.74294	10.445	10.048	1.0333e-12	5.3163e-10	18.858
CD248	0.74082	7.7441	7.3593	4.6122e-09	1.9867e-07	10.649
TSPAN13	0.73957	9.3386	3.8951	0.00034796	0.0017032	-0.26279
TRAF3IP3	0.73725	5.8661	6.5787	5.9799e-08	1.509e-06	8.1419
CST6	0.73602	5.0596	3.6292	0.00076852	0.0031959	-1.0151
MICAL1	0.73502	6.4471	5.5172	1.9883e-06	2.5433e-05	4.7219
FRZB	0.73435	8.967	4.2507	0.00011689	0.00070477	0.78017
CXCL8	0.7338	5.7438	2.6252	0.012048	0.02988	-3.5713
IFI16	0.73092	9.1519	7.6819	1.6176e-09	8.9707e-08	11.674
VAV1	0.72892	5.8786	6.4249	9.9366e-08	2.2891e-06	7.6454
PECAM1	0.72889	10.411	5.8799	6.0179e-07	9.6421e-06	5.8865
TRPV2	0.72858	7.3795	7.0874	1.1219e-08	4.0114e-07	9.7789
CCL20	0.72825	5.7489	2.7462	0.0088543	0.023329	-3.2915
SDF2L1	0.72706	8.9291	8.8522	3.9261e-11	6.3789e-09	15.311
SLC27A3	0.72681	8.935	7.538	2.5787e-09	1.2791e-07	11.218
CCR2	0.72681	5.7684	5.0288	9.8082e-06	9.2193e-05	3.1714
CLEC7A	0.72509	5.56	5.4664	2.35e-06	2.9174e-05	4.5592
UBE2C	0.72378	7.8001	4.061	0.00021003	0.0011322	0.21894
TEAD4	0.71729	8.4194	7.0406	1.3077e-08	4.4689e-07	9.6289
GJA4	0.717	9.0705	5.0634	8.7655e-06	8.3947e-05	3.2803
SPHK1	0.71481	6.4251	5.1826	5.948e-06	6.1818e-05	3.6566
CD86	0.71445	5.4609	5.8423	6.8138e-07	1.0677e-05	5.7654
CRTAC1	0.71392	7.0577	4.1327	0.00016846	0.0009484	0.42993
MYOZ2	0.71363	7.1537	2.8865	0.0061424	0.017385	-2.9567
TBX3	0.71305	8.4444	5.6142	1.4455e-06	1.9658e-05	5.0323
S100A9	0.71014	8.0895	2.9526	0.0051531	0.015088	-2.795
CD37	0.70984	5.4854	5.2246	5.1866e-06	5.502e-05	3.7896
STK10	0.70825	7.5153	9.7475	2.5321e-12	9.1589e-10	17.985
BASP1	0.70715	8.265	2.9159	0.005681	0.016334	-2.8848
DDX39A	0.70662	8.3653	7.6634	1.7179e-09	9.4138e-08	11.615
HCP5	0.7056	9.0064	4.8716	1.6306e-05	0.00014051	2.6789
NID2	0.70446	8.8043	3.1332	0.003157	0.010138	-2.3412
PILRA	0.70375	6.0491	6.1648	2.3474e-07	4.4831e-06	6.8054
KIAA1462	0.7025	7.4879	4.5236	4.9613e-05	0.00035507	1.6042
KIF4A	0.70187	5.174	4.6905	2.917e-05	0.00022835	2.1166
MAP4K4	0.70175	8.0656	8.661	7.1368e-11	1.0327e-08	14.727
BAG2	0.70175	6.213	3.6705	0.0006805	0.0028962	-0.89993
MOXD1	0.70152	6.6594	2.5133	0.015906	0.037713	-3.8218
KCNMB1	0.69674	7.1807	7.1021	1.069e-08	3.9131e-07	9.8261
SAC3D1	0.69547	7.2627	5.4209	2.7282e-06	3.2985e-05	4.4141
COMP	0.69466	5.043	3.4014	0.0014876	0.0054798	-1.6377
ALOX5AP	0.69389	6.5685	2.8181	0.0073504	0.020045	-3.1214
WFDC1	0.69382	9.3394	4.2153	0.00013049	0.00076975	0.67459
FSCN1	0.69281	7.4809	7.8197	1.037e-09	6.453e-08	12.109
CECR1	0.69234	10.038	3.9904	0.00026061	0.0013529	0.012815
DOK2	0.69022	6.72	6.9388	1.8267e-08	5.8922e-07	9.3019
TMSB10	0.68932	13.051	9.35	8.4489e-12	2.3013e-09	16.81
NDUFA4L2	0.68863	6.1293	5.9685	4.4905e-07	7.5625e-06	6.1722
DNMT1	0.68861	8.8172	8.4658	1.3193e-10	1.6291e-08	14.126
OAS3	0.68819	8.3772	2.9745	0.0048596	0.014401	-2.7409
TNFSF10	0.68586	9.6328	3.8312	0.00042172	0.0019805	-0.44579
TACC3	0.68443	5.9742	8.9274	3.1068e-11	5.6133e-09	15.539
SLC35G2	0.68264	7.7849	5.2575	4.6572e-06	5.0682e-05	3.8942
PLEKHO1	0.68192	7.7573	7.4998	2.9199e-09	1.4084e-07	11.096
CHORDC1	0.68117	7.1425	3.7331	0.00056541	0.0024935	-0.72431
SLC15A3	0.68027	8.483	6.351	1.2684e-07	2.7639e-06	7.4068
ARHGEF6	0.67985	8.9813	8.1054	4.1461e-10	3.2267e-08	13.006
LSM7	0.67954	7.5402	4.563	4.3775e-05	0.00032022	1.7249
CCL8	0.67941	5.2805	3.7402	0.0005536	0.0024533	-0.70428
SLC43A3	0.67687	7.7203	7.5382	2.5776e-09	1.2791e-07	11.218
ENO2	0.67679	7.0536	5.9537	4.7162e-07	7.8547e-06	6.1243
CDR2L	0.67578	7.6564	9.0194	2.3356e-11	4.916e-09	15.818
HMMR	0.67538	5.9051	4.0239	0.00023523	0.001242	0.11065
FBN1	0.67406	7.0591	5.5649	1.6999e-06	2.2522e-05	4.8745
CHRDL1	0.67318	10.18	4.3803	7.7963e-05	0.00051098	1.1692
IFIH1	0.67163	8.0364	3.6974	0.00062849	0.002716	-0.8246
TOR4A	0.67123	6.9758	6.6123	5.3523e-08	1.3846e-06	8.2503
NOSIP	0.67031	9.2845	5.3374	3.5862e-06	4.1206e-05	4.1482
SRGN	0.6702	10.269	4.1656	0.00015221	0.00087447	0.52705
BTK	0.6698	6.2779	5.9859	4.2396e-07	7.2174e-06	6.2283
CASP4	0.66973	7.7338	8.2262	2.8199e-10	2.4494e-08	13.383
LPXN	0.66904	8.0244	5.1009	7.7604e-06	7.6294e-05	3.3985
COL6A2	0.66815	6.527	4.2118	0.00013189	0.00077598	0.66442
ADRB2	0.66778	5.776	4.979	1.1526e-05	0.000106	3.015
FAP	0.66737	5.1951	2.7982	0.0077412	0.020889	-3.1688
RARRES1	0.66618	5.1193	3.0855	0.0035983	0.011258	-2.4627
TUBB6	0.66496	10.399	7.4854	3.0595e-09	1.4605e-07	11.051
OAS2	0.66433	7.3789	3.6271	0.00077337	0.0032132	-1.021
IL1B	0.66369	7.2378	3.9478	0.00029666	0.001503	-0.1108
RFTN1	0.66331	10.179	7.3548	4.68e-09	2.0065e-07	10.635
RAPGEF5	0.66178	8.0778	5.0278	9.8394e-06	9.2323e-05	3.1683
HIST2H2BE	0.66088	7.8072	4.6869	2.9502e-05	0.00023076	2.1057
ITIH3	0.66062	6.3666	4.8995	1.4901e-05	0.00013056	2.7662
VASH1	0.66046	7.7922	7.4274	3.6946e-09	1.7116e-07	10.866
BUB1B	0.66022	5.4808	3.5158	0.0010701	0.0041869	-1.3278
CST7	0.65984	7.1535	5.8147	7.4633e-07	1.155e-05	5.6766
MX1	0.65849	9.9576	2.4164	0.020125	0.045607	-4.0324
LRRC32	0.65842	10.187	5.3532	3.4058e-06	3.9671e-05	4.1983
UPP1	0.65788	8.233	3.785	0.0004843	0.0022046	-0.57731
LMNB1	0.65641	5.0281	6.6245	5.1407e-08	1.3448e-06	8.2897
CORO1C	0.65638	9.0594	4.0513	0.00021633	0.0011614	0.19071
TAF1A	0.65615	5.1264	5.8844	5.9298e-07	9.5175e-06	5.9009
MLLT11	0.65512	8.0151	3.2272	0.0024332	0.0081851	-2.0985
CCNB1	0.65496	5.929	3.6875	0.00064728	0.0027771	-0.85253
CHST15	0.65441	7.634	4.0095	0.00024581	0.0012854	0.068643
LGALS3	0.65154	10.07	3.4837	0.0011742	0.0045048	-1.4153
TRBC1	0.65127	6.451	4.1467	0.00016133	0.0009172	0.47131
NUSAP1	0.64864	6.5955	3.2426	0.0023309	0.0078839	-2.0584
FPR1	0.6486	7.3268	2.7252	0.0093453	0.024338	-3.3407
PTTG1	0.64613	8.7384	3.3102	0.0019272	0.0067863	-1.8806
COTL1	0.64236	9.4791	2.942	0.0053009	0.015433	-2.821
PPP1CA	0.64201	9.7189	5.0645	8.7336e-06	8.3728e-05	3.2839
ITGA4	0.63991	4.7843	5.4689	2.3302e-06	2.9006e-05	4.5675
HOPX	0.63985	8.6509	3.3707	0.0016238	0.0058927	-1.72
NT5E	0.63783	8.7833	2.4175	0.020071	0.045514	-4.03
PLEK	0.6374	7.0068	4.8378	1.8183e-05	0.00015305	2.5735
KDELC1	0.63613	7.1704	4.7987	2.0622e-05	0.00017036	2.4518
ADAM12	0.63586	5.3786	7.8791	8.5649e-10	5.5083e-08	12.297
HLA-DMB	0.63539	10.189	7.5375	2.5827e-09	1.2791e-07	11.216
CLEC4A	0.6348	5.8158	4.4645	5.9793e-05	0.00041201	1.4245
BID	0.63146	6.9969	5.3943	2.9766e-06	3.5387e-05	4.3293
BAZ1A	0.63118	6.1003	6.7552	3.3419e-08	9.4276e-07	8.7109
LIPA	0.63107	11.597	6.7847	3.0319e-08	8.743e-07	8.8062
AURKA	0.62933	6.288	4.5978	3.9203e-05	0.00029239	1.8313
NRBF2	0.62867	6.609	7.2666	6.2419e-09	2.5806e-07	10.353
MFAP2	0.62334	7.3694	2.9795	0.0047944	0.01424	-2.7284
SFT2D2	0.62325	7.6702	5.5123	2.0206e-06	2.5775e-05	4.7062
PPARG	0.62244	7.2523	5.3504	3.4376e-06	3.9901e-05	4.1893
TNFRSF11B	0.62098	7.3284	2.5153	0.015829	0.037578	-3.8175
GIMAP4	0.62078	10.282	5.0607	8.8442e-06	8.4526e-05	3.2717
SOX4	0.62053	7.4252	5.6315	1.3654e-06	1.8981e-05	5.0879
KPNA2	0.62038	9.7988	4.0195	0.00023842	0.0012545	0.09782
NARF	0.61852	8.4715	6.9378	1.8324e-08	5.8922e-07	9.2988
TPX2	0.61591	5.7388	3.5523	0.00096247	0.0038354	-1.2277
RBP1	0.61544	7.8968	4.8155	1.9536e-05	0.00016285	2.5041
MARCKS	0.61525	5.8451	5.0081	1.0487e-05	9.722e-05	3.1065
PSMB8	0.61512	10.511	6.7889	2.9906e-08	8.655e-07	8.8196
STAB1	0.61484	7.376	6.0107	3.9063e-07	6.7367e-06	6.3082
COL5A1	0.61423	6.1137	3.465	0.0012395	0.004691	-1.4662
PRF1	0.61215	7.0997	3.8345	0.00041756	0.001966	-0.43636
TAP1	0.61096	9.8778	5.8189	7.3602e-07	1.1418e-05	5.6902
IFI27	0.61091	10.658	3.4034	0.0014792	0.0054534	-1.6325
CRLF1	0.61073	5.0508	3.4689	0.0012255	0.0046573	-1.4555
RHBDF2	0.61027	7.4559	6.5199	7.2607e-08	1.7742e-06	7.9521
COL21A1	0.60887	6.2661	3.5451	0.00098288	0.0039016	-1.2475
PSTPIP2	0.60789	5.1808	5.8899	5.8221e-07	9.3772e-06	5.9188
PMAIP1	0.60761	4.7268	4.3423	8.7816e-05	0.00056066	1.0548
ID1	0.60441	10.527	3.5943	0.00085134	0.0034871	-1.1119
GINS1	0.6043	6.0927	3.4564	0.0012703	0.004794	-1.4893
YWHAH	0.60412	8.8273	5.7979	7.8898e-07	1.2137e-05	5.6224
NME1	0.60353	9.7934	4.3003	0.00010015	0.000625	0.92852
DTL	0.60224	4.7491	3.7676	0.00051021	0.0022993	-0.62681
SYNM	0.60173	8.6932	5.2262	5.1598e-06	5.4988e-05	3.7947
PMP22	0.60118	9.8563	3.7679	0.00050969	0.0022981	-0.62583
MMP2	0.59959	7.8384	3.6092	0.00081497	0.0033574	-1.0706
SAMHD1	0.59951	7.3752	5.0503	9.1476e-06	8.7067e-05	3.239
CENPM	0.59859	5.6105	5.4467	2.5066e-06	3.0951e-05	4.4965
FHL5	0.59581	5.3861	5.356	3.3748e-06	3.9413e-05	4.2072
PLAUR	0.59561	7.2533	3.9311	0.00031203	0.0015587	-0.15896
CDK1	0.59535	5.3032	3.831	0.00042196	0.0019806	-0.44632
CDKN3	0.59358	5.5407	3.8904	0.00035292	0.0017202	-0.27628
APOBEC3G	0.59263	8.3942	5.6719	1.195e-06	1.7105e-05	5.2178
PSMB9	0.59201	10.726	5.9729	4.4261e-07	7.4799e-06	6.1863
CRLF3	0.59178	9.1061	7.6449	1.8236e-09	9.7618e-08	11.557
ANXA6	0.59174	9.1798	5.7402	9.5423e-07	1.4171e-05	5.437
CDO1	0.59087	6.4964	3.9359	0.0003075	0.001541	-0.14501
LSP1	0.58863	6.8228	6.2875	1.5646e-07	3.2911e-06	7.2017
RHOG	0.58759	9.9235	10.298	4.94e-13	3.2046e-10	19.575
TCF4	0.5866	7.7576	5.7478	9.3054e-07	1.3944e-05	5.4615
ENTPD1	0.58648	5.9435	5.8743	6.1303e-07	9.7884e-06	5.8685
EGFL7	0.58502	8.3777	4.4617	6.0338e-05	0.00041453	1.4157
SFXN3	0.58474	8.565	7.7928	1.1307e-09	6.9347e-08	12.025
NAA10	0.58447	8.6209	7.4273	3.6963e-09	1.7116e-07	10.865
COL7A1	0.58415	6.9122	4.5394	4.7179e-05	0.00034038	1.6527
RNASE2	0.58401	5.8912	4.2994	0.00010041	0.00062577	0.92605
PLEKHA8P1	0.58252	5.6959	7.06	1.2272e-08	4.2911e-07	9.6911
CINP	0.58185	8.1173	6.7512	3.3857e-08	9.4727e-07	8.6982
CAMK1	0.5818	7.1092	6.8463	2.4756e-08	7.468e-07	9.0045
HOMER3	0.58125	6.6669	6.139	2.5564e-07	4.7925e-06	6.7221
BCAT1	0.5803	4.9631	7.3262	5.1371e-09	2.1823e-07	10.543
CENPU	0.5802	5.2555	3.8017	0.00046079	0.0021273	-0.53001
UBE2J1	0.57951	8.5499	6.8684	2.3023e-08	7.0367e-07	9.0755
A2M	0.57785	12.453	4.9546	1.2473e-05	0.00011302	2.9385
ADGRE1	0.57716	6.1094	4.8459	1.7715e-05	0.00015037	2.5988
RUNX3	0.57646	5.7831	7.0886	1.1174e-08	4.0114e-07	9.7828
TLR8	0.57492	5.5	4.7798	2.191e-05	0.00017846	2.3932
AP2S1	0.57443	9.2366	6.5766	6.0215e-08	1.5113e-06	8.1351
FOXM1	0.57407	5.4578	3.9418	0.00030211	0.0015239	-0.12813
TUBA1A	0.57393	12.164	7.0858	1.1276e-08	4.0164e-07	9.7739
PLAU	0.57345	7.2885	2.7005	0.0099564	0.025648	-3.3983
HMOX1	0.57314	8.7065	2.5221	0.015565	0.037123	-3.8024
CLIC1	0.57285	11.648	7.9874	6.0473e-10	4.2746e-08	12.637
MYD88	0.57225	10.426	7.4095	3.9162e-09	1.7696e-07	10.809
TREM2	0.57112	6.7545	3.8983	0.00034463	0.0016905	-0.25365
KCNJ2	0.57103	7.564	3.9816	0.00026763	0.0013823	-0.012551
CD3D	0.57101	6.0483	3.6365	0.00075224	0.0031466	-0.99483
NRP1	0.57056	8.3613	5.4993	2.1089e-06	2.6717e-05	4.6646
OSBPL3	0.57054	6.4541	5.2361	4.9951e-06	5.3665e-05	3.8262
RARRES3	0.57037	9.5462	5.4532	2.4536e-06	3.0337e-05	4.5173
BTN3A3	0.57027	8.0524	3.1584	0.0029449	0.0095778	-2.2765
NCKAP1L	0.57021	7.078	5.6163	1.4353e-06	1.9606e-05	5.0392
PDLIM4	0.56992	5.7579	3.1607	0.0029264	0.0095226	-2.2706
ABCC3	0.56922	6.9348	3.2133	0.0025293	0.0084593	-2.1347
GLRX2	0.56773	8.7781	5.8261	7.1868e-07	1.1205e-05	5.7134
TSPO	0.56756	10.504	6.7551	3.3427e-08	9.4276e-07	8.7107
LCK	0.5668	5.8162	5.2146	5.3574e-06	5.6253e-05	3.7581
KDELR3	0.56667	9.0079	3.3622	0.0016634	0.0060103	-1.7426
NINJ2	0.56281	6.3858	6.2011	2.0818e-07	4.1171e-06	6.9227
PROCR	0.56258	6.0943	5.1658	6.2835e-06	6.4398e-05	3.6033
RIT1	0.56238	7.5542	5.9187	5.2934e-07	8.6154e-06	6.0117
SLC16A3	0.56214	6.5908	4.7223	2.6349e-05	0.0002091	2.2149
SCO2	0.56172	7.6953	3.9687	0.00027835	0.0014234	-0.05001
MFGE8	0.56163	6.8989	5.5276	1.9218e-06	2.4857e-05	4.755
NAGK	0.56127	9.7157	7.575	2.287e-09	1.1702e-07	11.335
RPL36	0.56057	10.838	5.3053	3.9835e-06	4.4554e-05	4.046
SMAGP	0.56039	7.8037	5.7096	1.0556e-06	1.5371e-05	5.3386
CD68	0.55938	5.4052	5.3061	3.9738e-06	4.4499e-05	4.0484
PGLS	0.55893	9.3815	5.0102	1.0416e-05	9.6757e-05	3.113
ECT2	0.558	5.4865	3.6664	0.00068888	0.0029238	-0.91153
INPP4B	0.55654	5.2288	5.0863	8.1386e-06	7.8923e-05	3.3523
RBM28	0.55534	7.6447	6.1239	2.6868e-07	4.9765e-06	6.6736
SLCO3A1	0.55418	7.6079	7.5312	2.6368e-09	1.2989e-07	11.196
SNF8	0.55328	9.2254	5.8332	7.0204e-07	1.0964e-05	5.7362
KCNK15	0.55276	5.4752	3.0696	0.0037572	0.01168	-2.5028
JAG2	0.55168	8.1355	4.838	1.8172e-05	0.00015305	2.5741
CKS2	0.55162	8.1466	2.4671	0.017806	0.041307	-3.923
RGS19	0.551	7.9748	5.6231	1.4036e-06	1.9344e-05	5.061
FAM64A	0.55037	5.8964	3.7535	0.00053212	0.0023772	-0.66672
DGKZ	0.55013	9.2178	3.3379	0.0017822	0.0063725	-1.8073
POPDC2	0.54915	7.8229	5.536	1.8694e-06	2.435e-05	4.7819
RTN1	0.54889	5.6684	3.6269	0.00077371	0.0032132	-1.0215
ELK3	0.54844	7.4287	7.1736	8.4588e-09	3.2237e-07	10.055
NUDT1	0.54841	6.7732	6.757	3.3214e-08	9.4276e-07	8.7169
PPIB	0.54839	10.957	5.9923	4.1515e-07	7.0928e-06	6.2488
RAMP1	0.54834	8.4683	2.4642	0.017933	0.041519	-3.9293
COQ2	0.54702	7.1763	5.3499	3.4425e-06	3.9901e-05	4.1879
PTP4A3	0.54633	6.9454	6.2936	1.5337e-07	3.2427e-06	7.2212
CSTB	0.54489	11.757	5.633	1.3587e-06	1.8951e-05	5.0927
RAD51AP1	0.54447	4.9339	5.0884	8.0815e-06	7.8699e-05	3.3591
AURKB	0.54399	5.1783	4.1112	0.00017999	0.0010017	0.36658
CYBA	0.54347	9.463	3.6619	0.00069802	0.0029531	-0.92401
CSK	0.5431	9.1884	8.4197	1.5263e-10	1.7454e-08	13.984
GAS2	0.54253	8.6551	3.1686	0.0028635	0.0093718	-2.2504
MCM5	0.54222	7.3359	4.9058	1.4604e-05	0.00012836	2.7857
HACD1	0.54071	6.8899	3.221	0.0024757	0.0083129	-2.1147
CD1D	0.54045	4.749	4.5536	4.5109e-05	0.00032816	1.696
DPEP2	0.54012	6.9246	4.0886	0.00019293	0.0010578	0.30017
ELOVL1	0.5391	8.8412	7.664	1.7146e-09	9.4138e-08	11.617
RALY	0.53863	8.7974	6.0749	3.1596e-07	5.7486e-06	6.5153
KRT17	0.53823	5.7477	3.6904	0.00064164	0.0027587	-0.84423
DUSP5	0.53721	8.424	3.4681	0.0012283	0.0046622	-1.4577
HLA-DRA	0.537	11.418	5.1936	5.7379e-06	5.9953e-05	3.6915
TMEM45A	0.53636	9.2859	3.0386	0.0040879	0.012473	-2.581
ARHGDIB	0.53612	10.944	6.1647	2.3478e-07	4.4831e-06	6.8053
TMEM140	0.53599	9.3507	5.1656	6.2861e-06	6.4398e-05	3.6029
MICALL1	0.53448	8.2857	7.6209	1.9707e-09	1.0311e-07	11.481
BTN3A2	0.53424	8.4713	2.8913	0.0060641	0.017205	-2.9449
ITGAL	0.53413	5.2536	5.2011	5.5989e-06	5.8589e-05	3.7153
POLE2	0.53394	6.5532	5.3232	3.7573e-06	4.2681e-05	4.1029
ANXA1	0.53264	11.465	3.512	0.0010819	0.004217	-1.3381
ORMDL2	0.53165	9.1452	7.1555	8.9757e-09	3.4067e-07	9.9972
PTGS2	0.53149	5.0019	2.6202	0.0122	0.030199	-3.5827
MANF	0.53041	9.8816	6.2776	1.6167e-07	3.3569e-06	7.1697
TM6SF1	0.53012	6.2754	3.5117	0.0010829	0.0042187	-1.3389
MFNG	0.5301	7.5917	6.0454	3.4835e-07	6.145e-06	6.42
DRAM1	0.52974	9.275	4.7793	2.1943e-05	0.00017857	2.3917
SMCO4	0.52805	8.8042	3.5766	0.00089668	0.0036391	-1.1609
ORC6	0.52673	5.2994	5.3389	3.5689e-06	4.1109e-05	4.1529
DDRGK1	0.52658	9.4084	6.9402	1.818e-08	5.8922e-07	9.3065
FBN2	0.52596	5.0894	3.3958	0.0015116	0.0055541	-1.6528
HK2	0.5255	6.2647	2.9109	0.0057579	0.016499	-2.8972
MARCKSL1	0.5252	10.162	5.0972	7.8544e-06	7.7054e-05	3.3868
C17orf62	0.52511	7.1729	5.5291	1.912e-06	2.4787e-05	4.76
S100A11	0.52509	10.061	6.0887	3.0182e-07	5.5132e-06	6.56
RRP8	0.52507	7.8762	4.7029	2.8034e-05	0.00022042	2.155
DDX58	0.52457	6.5409	2.8703	0.0064097	0.01801	-2.9958
CTSZ	0.52369	7.7541	5.242	4.8997e-06	5.2947e-05	3.8449
TNFRSF4	0.52266	6.4568	5.7188	1.0241e-06	1.4983e-05	5.3681
AVEN	0.52258	7.2587	5.8098	7.5842e-07	1.1706e-05	5.6609
TWF2	0.52213	7.7157	7.0473	1.2794e-08	4.4377e-07	9.6503
TPM4	0.52078	6.3326	7.1163	1.0205e-08	3.7503e-07	9.8716
BAX	0.52019	6.0291	6.0936	2.9704e-07	5.4365e-06	6.5756
C1R	0.51995	10.185	4.8465	1.7683e-05	0.00015024	2.6005
PDLIM1	0.51942	11.585	6.3856	1.1315e-07	2.5189e-06	7.5184
MAP3K8	0.51919	5.3901	4.0072	0.00024754	0.0012915	0.061941
MFSD10	0.51894	7.7759	4.304	9.8996e-05	0.00061863	0.93967
TYMP	0.51833	7.5222	3.1668	0.0028776	0.0093933	-2.255
TLR7	0.51764	4.753	4.6284	3.5555e-05	0.00027034	1.9255
GALNT7	0.51668	7.1305	2.7859	0.0079908	0.02144	-3.1978
SPRY1	0.51658	9.5265	3.8511	0.00039733	0.0018927	-0.38912
PCDH17	0.51651	7.1499	3.6123	0.00080764	0.0033302	-1.062
TRPC6	0.51632	6.8682	3.2464	0.0023059	0.0078226	-2.0484
IGFLR1	0.51579	7.0655	4.9194	1.3976e-05	0.00012445	2.8282
FAM50A	0.51533	8.916	4.6219	3.63e-05	0.00027488	1.9055
SNAI2	0.51413	9.5439	4.0466	0.00021945	0.0011734	0.177
SEMA4C	0.51324	9.2154	5.8718	6.1814e-07	9.8361e-06	5.8604
PRR5L	0.51261	5.2543	6.3426	1.304e-07	2.8281e-06	7.3798
NTAN1	0.51169	8.9976	6.2825	1.5907e-07	3.3253e-06	7.1856
KLRF1	0.5095	5.5279	3.1423	0.0030786	0.0099306	-2.3178
CHST7	0.50939	5.9725	5.1114	7.5006e-06	7.4531e-05	3.4315
GTF2H4	0.50926	6.2752	5.176	6.0778e-06	6.2671e-05	3.6357
KIAA0226L	0.50924	4.9368	3.2208	0.0024769	0.0083129	-2.1152
EHBP1L1	0.50899	6.1491	8.1668	3.4074e-10	2.744e-08	13.198
MATN2	0.50877	9.5491	3.1682	0.0028666	0.0093736	-2.2514
MEIS2	0.50868	10.713	3.3143	0.0019055	0.0067381	-1.87
COL16A1	0.50832	5.7313	2.9387	0.0053475	0.015549	-2.8291
SLC1A4	0.50743	7.4274	7.1324	9.6793e-09	3.6e-07	9.9233
LAP3	0.50605	10.386	4.6299	3.5392e-05	0.00026954	1.93
FDPS	0.50548	9.5753	4.7951	2.0859e-05	0.00017171	2.4407
NEFM	0.50496	5.114	3.2207	0.0024775	0.0083129	-2.1154
CLIC2	0.50477	7.4142	3.7175	0.00059219	0.002593	-0.7682
ATG101	0.50476	8.8903	4.8017	2.0421e-05	0.0001692	2.4612
SP140L	0.50465	7.7615	4.4024	7.2724e-05	0.00048314	1.2361
MMRN2	0.50398	8.515	3.4247	0.0013918	0.0051644	-1.5752
HDAC9	0.50232	6.2271	5.0245	9.9442e-06	9.3117e-05	3.158
EED	0.50227	6.0079	6.9964	1.5116e-08	5.0357e-07	9.4871
CDC42SE1	0.50205	9.0656	4.873	1.6235e-05	0.00014025	2.6832
GZMK	0.50168	6.1614	3.6411	0.00074221	0.0031145	-0.98212
GLT8D2	0.50131	7.6602	3.8167	0.00044055	0.0020492	-0.48732
TSTA3	0.50113	8.14	5.092	7.9877e-06	7.8115e-05	3.3705
COL11A1	0.5011	4.879	2.3792	0.021995	0.048918	-4.1114
NRAS	0.49992	7.4511	4.3309	9.0999e-05	0.00057604	1.0206
HOXC6	0.49898	9.0746	5.6013	1.5078e-06	2.0238e-05	4.9912
HDAC5	0.49878	7.7119	4.5608	4.4095e-05	0.0003223	1.7179
TKT	0.49811	7.881	3.9967	0.00025565	0.0013301	0.031171
HLA-DMA	0.49643	10.645	5.7431	9.4522e-07	1.4131e-05	5.4463
ADCY7	0.49618	6.5473	3.1128	0.0033392	0.010598	-2.3933
MSC	0.49548	5.224	4.566	4.3373e-05	0.00031778	1.7338
CLEC2B	0.49544	8.8886	4.038	0.00022537	0.0012023	0.15158
SLC2A3	0.49528	7.1351	3.8253	0.00042933	0.0020065	-0.4628
RNASE1	0.49489	11.987	3.3584	0.0016814	0.006066	-1.7527
ZWINT	0.49467	7.788	2.8925	0.0060445	0.017171	-2.9419
STK17B	0.49384	5.879	4.616	3.6995e-05	0.00027871	1.8872
FADS3	0.49367	7.7562	6.4676	8.6288e-08	2.0438e-06	7.7833
GPM6B	0.49333	6.7913	2.9639	0.0049989	0.014748	-2.7669
PPIC	0.49287	9.2491	5.0735	8.4841e-06	8.2015e-05	3.312
GAL3ST4	0.49276	6.7999	5.2075	5.4839e-06	5.745e-05	3.7355
NPDC1	0.49189	9.309	4.4518	6.2242e-05	0.00042563	1.3858
WIPF1	0.49155	6.53	6.2427	1.8147e-07	3.6774e-06	7.0569
NUP85	0.4909	8.7023	5.6097	1.4667e-06	1.9867e-05	5.0182
CSPG4	0.49039	5.732	5.6917	1.1198e-06	1.6153e-05	5.2811
IER2	0.4901	11.469	3.9692	0.00027792	0.001422	-0.048558
OSGEP	0.48916	7.4726	4.1038	0.00018414	0.001017	0.34478
CCR5	0.48868	7.751	3.6803	0.00066106	0.0028277	-0.87248
MN1	0.48821	6.1102	3.9869	0.00026341	0.0013651	0.0026238
RAB32	0.48812	8.565	6.006	3.9679e-07	6.8303e-06	6.2929
MGLL	0.48806	8.6556	3.0316	0.0041661	0.012667	-2.5985
SIL1	0.48789	9.117	4.283	0.00010571	0.00065104	0.8767
LYL1	0.48771	7.5479	6.1685	2.319e-07	4.4648e-06	6.8173
FES	0.4877	6.3879	5.3602	3.3283e-06	3.8918e-05	4.2207
PLP2	0.48744	10.359	5.0273	9.8556e-06	9.2381e-05	3.1667
NRGN	0.48713	7.9239	4.3404	8.8348e-05	0.00056272	1.049
TRIP13	0.48633	6.3371	3.7951	0.00046991	0.0021589	-0.54864
CCNA2	0.48604	5.213	4.4686	5.9041e-05	0.00040804	1.4367
ARHGEF15	0.48587	8.4547	4.0931	0.00019028	0.0010446	0.31338
REEP4	0.48571	8.6091	8.0286	5.3006e-10	3.9271e-08	12.766
BAMBI	0.48534	10.982	3.0225	0.0042702	0.012915	-2.6213
HEPH	0.4844	7.3391	3.129	0.0031942	0.010232	-2.3521
WARS	0.48424	10.738	4.2875	0.00010423	0.00064513	0.8902
LILRB1	0.48379	6.5204	5.3946	2.9733e-06	3.5387e-05	4.3304
PIK3C2B	0.48276	9.4646	4.6857	2.9612e-05	0.00023126	2.1021
MRPL23	0.48268	8.3792	3.6654	0.00069089	0.0029296	-0.91429
SEC24D	0.48256	6.6961	4.4696	5.885e-05	0.00040703	1.4398
NANS	0.48171	8.0613	4.619	3.6643e-05	0.00027725	1.8964
CSRP2	0.48166	9.0928	3.9209	0.00032187	0.0015974	-0.18853
YARS	0.48145	10.058	8.3262	2.0523e-10	2.0006e-08	13.694
CASP7	0.48065	8.1653	5.2708	4.4594e-06	4.8874e-05	3.9364
MAP7D1	0.48	8.6287	6.1676	2.3258e-07	4.4688e-06	6.8144
ELF4	0.4798	8.1266	6.0171	3.8252e-07	6.6464e-06	6.3287
NOD2	0.47865	5.2104	4.8009	2.0471e-05	0.00016942	2.4589
LYVE1	0.477	5.3615	2.6989	0.009995	0.025705	-3.4019
DPY19L1	0.4767	7.5824	6.2536	1.7501e-07	3.5701e-06	7.0922
CTSK	0.47606	8.7727	4.3516	8.5293e-05	0.0005474	1.0828
PLA1A	0.47574	9.5217	2.6125	0.012436	0.030679	-3.6
ABCC10	0.47558	8.1601	5.2249	5.1815e-06	5.502e-05	3.7906
EBI3	0.47518	5.6675	5.2548	4.6989e-06	5.1076e-05	3.8855
FAM189A2	0.47485	7.6708	4.4202	6.8758e-05	0.00046076	1.29
FAM57A	0.47445	8.042	5.1105	7.523e-06	7.4674e-05	3.4286
DYRK2	0.47431	5.9591	5.3977	2.9435e-06	3.5173e-05	4.3402
SNORA25	0.47354	5.7544	4.44	6.4599e-05	0.00043771	1.3501
ZNF557	0.47317	5.3173	5.6629	1.231e-06	1.7565e-05	5.1889
ACOT9	0.47287	9.4058	7.2977	5.6384e-09	2.3521e-07	10.452
SMARCD3	0.47281	8.228	3.0632	0.0038233	0.01183	-2.519
CENPF	0.47255	5.4045	4.2894	0.00010362	0.00064253	0.89583
IFNGR2	0.47215	9.7748	5.2416	4.9065e-06	5.2959e-05	3.8435
S100A10	0.47171	12.077	4.0144	0.00024221	0.0012694	0.082735
CRELD2	0.47164	10.989	6.128	2.6514e-07	4.9306e-06	6.6865
CASP3	0.4713	7.6426	5.2168	5.3198e-06	5.5985e-05	3.765
SMC4	0.47108	7.6653	4.6082	3.7921e-05	0.0002839	1.8634
HOXB6	0.47053	7.3119	5.0345	9.6295e-06	9.0956e-05	3.1892
HEY1	0.46979	9.4703	3.7138	0.00059872	0.0026155	-0.77861
SECTM1	0.4682	7.6464	5.519	1.9767e-06	2.532e-05	4.7276
DHCR24	0.46808	7.979	2.8258	0.0072027	0.019735	-3.1028
INSL4	0.4678	5.828	2.8871	0.0061315	0.017362	-2.955
GUCY1A3	0.46711	8.0749	4.3438	8.7398e-05	0.00055897	1.0594
PAK1IP1	0.467	6.0125	4.5085	5.2041e-05	0.00036988	1.5582
LSM2	0.46694	7.6165	4.6742	3.0726e-05	0.00023892	2.0664
LILRA5	0.46631	4.8917	4.0381	0.00022525	0.0012023	0.15207
THG1L	0.46609	6.5493	5.3328	3.6417e-06	4.1653e-05	4.1332
IMPDH2	0.46516	9.9634	2.6332	0.011805	0.029452	-3.5529
LXN	0.46474	9.2279	3.7304	0.00056988	0.0025108	-0.73178
CCND1	0.46412	8.2742	3.3286	0.00183	0.0065158	-1.8321
ID3	0.46404	10.292	3.8706	0.00037462	0.001807	-0.3331
DACT1	0.46294	5.5552	2.4989	0.016477	0.038798	-3.8535
TUBA4A	0.46253	8.8559	3.6081	0.00081756	0.0033666	-1.0736
APOBEC3F	0.46223	5.4028	4.7812	2.1812e-05	0.00017798	2.3975
BRMS1	0.46178	8.4264	4.8712	1.6329e-05	0.00014051	2.6776
C15orf39	0.46018	6.657	7.9872	6.052e-10	4.2746e-08	12.636
ZPR1	0.45972	7.4117	5.4879	2.1891e-06	2.7508e-05	4.6283
ITGB6	0.4595	4.9468	2.5444	0.014734	0.035498	-3.753
CD79B	0.45931	6.7344	4.187	0.00014243	0.00083117	0.59069
RIN2	0.45914	10.878	5.0161	1.0219e-05	9.5112e-05	3.1316
TRMT1	0.45899	6.4837	4.1297	0.00017001	0.00095481	0.42115
P3H1	0.45847	8.386	4.3976	7.383e-05	0.00048873	1.2216
LAMA2	0.45743	5.9357	4.95	1.266e-05	0.00011451	2.924
ARAP3	0.45561	8.2914	4.849	1.7539e-05	0.00014929	2.6084
LIN37	0.45527	6.7349	3.482	0.00118	0.0045226	-1.4199
FAS	0.45399	6.5222	4.0341	0.00022805	0.0012138	0.14029
GADD45A	0.45384	11.794	3.0343	0.0041354	0.012586	-2.5917
CD38	0.45382	6.6173	4.9499	1.2662e-05	0.00011451	2.9238
CCR10	0.4532	5.4081	6.6079	5.431e-08	1.401e-06	8.236
TIE1	0.45305	7.4599	2.7528	0.0087054	0.023021	-3.276
ADGRA2	0.45141	7.1183	6.5966	5.6362e-08	1.4419e-06	8.1997
YARS2	0.4514	7.8805	5.4365	2.592e-06	3.171e-05	4.4639
INPP5D	0.45114	6.6347	7.9374	7.1e-10	4.764e-08	12.48
TUBB3	0.45019	6.9055	4.7056	2.779e-05	0.00021884	2.1634
SEC24C	0.4498	9.532	3.806	0.00045486	0.0021031	-0.51771
CXCL3	0.44966	5.087	5.8875	5.8685e-07	9.4355e-06	5.911
RCN3	0.44915	6.6001	6.6161	5.2857e-08	1.375e-06	8.2625
ARPC2	0.44901	10.999	7.9298	7.2752e-10	4.8125e-08	12.456
NSUN5P1	0.44861	7.0319	3.1394	0.0031036	0.010004	-2.3253
IL1RL1	0.44791	9.6802	2.4696	0.017696	0.041114	-3.9174
OSMR	0.44766	6.1777	4.2139	0.00013106	0.00077208	0.67048
C9orf16	0.44746	8.0125	4.9576	1.2351e-05	0.00011225	2.948
TFPT	0.44719	7.1076	4.6737	3.0771e-05	0.00023907	2.065
PPCDC	0.44687	7.3092	4.7678	2.2766e-05	0.00018462	2.3561
DTYMK	0.4466	7.5274	6.3675	1.2011e-07	2.6297e-06	7.4601
IL2RB	0.44623	7.2828	6.3029	1.4871e-07	3.1659e-06	7.2514
SIPA1	0.44578	6.9657	7.3847	4.2456e-09	1.8546e-07	10.73
MECOM	0.44554	7.4723	2.8746	0.0063374	0.017847	-2.9854
RELB	0.44515	6.7701	5.7625	8.8662e-07	1.3367e-05	5.5087
MRTO4	0.44434	6.4574	4.201	0.00013638	0.0007999	0.63228
MYBPH	0.44426	7.1827	2.4072	0.020574	0.046435	-4.052
THOC6	0.44373	5.9392	4.08	0.00019813	0.0010806	0.27471
TPM1	0.44296	10.002	3.5556	0.00095329	0.0038021	-1.2187
RPP40	0.44266	7.3314	5.7608	8.9163e-07	1.3405e-05	5.5032
PVRIG	0.44254	6.0781	5.1757	6.0837e-06	6.2671e-05	3.6347
POLD4	0.44217	8.7602	4.6981	2.8468e-05	0.00022342	2.1401
SLC20A1	0.44207	9.0999	2.6846	0.010367	0.026551	-3.4351
ENAH	0.44141	7.159	4.51	5.1795e-05	0.00036841	1.5628
CD300C	0.44138	5.9489	5.4392	2.569e-06	3.1511e-05	4.4726
ADGRL4	0.44123	9.0926	3.5615	0.00093694	0.0037595	-1.2024
SLFN12	0.4407	6.2083	4.6253	3.5908e-05	0.00027258	1.916
SCARA3	0.4397	5.8143	4.1697	0.00015026	0.00086484	0.53944
TRDC	0.43873	5.8259	6.207	2.0418e-07	4.049e-06	6.9417
KIF11	0.43765	4.7446	2.7327	0.0091669	0.023988	-3.3231
GCNT3	0.43747	5.994	3.296	0.0020064	0.0069853	-1.9183
RTP4	0.43718	8.2739	2.7713	0.0082996	0.022119	-3.2325
NOS3	0.43686	5.846	3.8305	0.0004227	0.0019831	-0.44798
ASGR1	0.43654	5.0203	6.3685	1.1972e-07	2.6273e-06	7.4633
UBFD1	0.43622	7.6583	3.8629	0.00038344	0.0018385	-0.35526
GPR183	0.4362	5.2391	2.9112	0.0057534	0.016496	-2.8965
TNF	0.4359	6.2487	5.6462	1.3007e-06	1.8335e-05	5.1352
LIF	0.43565	6.5191	3.2538	0.0022586	0.0077043	-2.029
CELF2	0.43485	6.0395	4.9442	1.2898e-05	0.00011631	2.9059
PDIA5	0.43465	9.4571	4.0177	0.00023977	0.0012609	0.092413
KIAA0922	0.43453	7.0479	5.0867	8.1279e-06	7.8902e-05	3.3536
TAGLN2	0.43419	9.4515	4.1728	0.00014883	0.00085928	0.5486
DYSF	0.43411	10.563	3.6208	0.00078774	0.0032583	-1.0385
TRIM21	0.43298	8.7776	5.1923	5.762e-06	6.0092e-05	3.6874
INTS8	0.43208	9.1493	5.3029	4.0149e-06	4.4852e-05	4.0384
PSTPIP1	0.43159	5.5115	5.3319	3.6521e-06	4.1653e-05	4.1304
RPS6KA3	0.4309	7.9187	5.7905	8.0823e-07	1.235e-05	5.5989
CD93	0.43079	9.1644	3.1675	0.0028724	0.0093864	-2.2533
IL3RA	0.43063	6.3786	4.2839	0.00010539	0.00064983	0.87954
CLEC11A	0.43043	6.6374	5.4421	2.5449e-06	3.1341e-05	4.4817
PIEZO2	0.43009	6.848	3.7876	0.00048059	0.0021903	-0.57
GNL2	0.42725	7.4224	3.9128	0.0003298	0.0016281	-0.21174
HSPBAP1	0.42684	7.6195	4.2224	0.00012762	0.00075596	0.69597
ASPHD1	0.42604	6.5994	4.7646	2.3005e-05	0.00018607	2.346
ZYX	0.42576	8.2382	4.4289	6.6909e-05	0.00044967	1.3162
GNAI1	0.42575	8.006	3.6757	0.00067016	0.0028588	-0.88544
PSMA7	0.42554	9.6127	5.5589	1.7335e-06	2.2902e-05	4.8554
TMC6	0.42484	6.4398	8.3821	1.7188e-10	1.8089e-08	13.868
MYDGF	0.42385	9.3525	6.5803	5.9481e-08	1.5074e-06	8.1471
TRIM38	0.42346	8.3799	5.9794	4.3324e-07	7.3618e-06	6.2072
PIP5K1B	0.42285	8.6315	2.5222	0.015563	0.037123	-3.8022
DNAJC17	0.42278	5.7992	3.2266	0.0024369	0.0081947	-2.1
DSE	0.4218	9.2698	4.5035	5.2872e-05	0.00037492	1.5429
ITGA5	0.4217	8.0688	7.9945	5.9126e-10	4.2746e-08	12.659
HRAS	0.42107	8.9574	4.2256	0.00012637	0.00075018	0.70541
ADCY3	0.42088	6.6286	5.6266	1.3875e-06	1.9179e-05	5.0722
EIF4E2	0.41998	9.1793	5.6145	1.4437e-06	1.9658e-05	5.0336
CENPA	0.41987	5.1028	3.7457	0.00054449	0.0024208	-0.68854
N6AMT1	0.41983	6.369	4.9056	1.4614e-05	0.00012836	2.785
UTP6	0.41935	8.497	3.8936	0.00034956	0.0017074	-0.26718
P2RX5	0.41933	6.6365	3.1641	0.0028994	0.0094479	-2.262
DDB2	0.41866	7.8831	4.5009	5.3309e-05	0.00037658	1.535
HIST1H1C	0.41834	7.8816	3.4111	0.0014468	0.005351	-1.6117
FUT1	0.4176	7.821	3.8718	0.00037328	0.0018014	-0.32969
RAP1GAP2	0.4176	6.6615	2.9467	0.0052343	0.015297	-2.8094
GPN2	0.41655	6.8893	6.0637	3.2783e-07	5.9068e-06	6.4793
WISP1	0.41589	5.9213	4.4246	6.7814e-05	0.00045476	1.3033
RSRP1	0.41578	9.0055	4.4855	5.5971e-05	0.00039096	1.4881
DNAJA1	0.41576	10.84	4.5024	5.3046e-05	0.00037554	1.5398
HK1	0.41533	11.02	7.3157	5.3165e-09	2.238e-07	10.51
TAF11	0.41519	8.2628	4.3443	8.7276e-05	0.00055879	1.0607
GALNT1	0.41504	8.9633	3.751	0.00053599	0.002391	-0.67361
PPRC1	0.41474	6.1995	4.3278	9.1894e-05	0.00058051	1.0112
CCDC69	0.41439	5.6097	3.8972	0.00034572	0.0016949	-0.25664
S100A13	0.41418	9.9132	4.2381	0.00012155	0.00072776	0.74267
NSUN5	0.41409	7.3014	3.4109	0.0014476	0.0053518	-1.6122
BDNF	0.41402	4.7753	6.8038	2.8475e-08	8.3452e-07	8.8675
CD58	0.41361	8.5588	5.0867	8.1264e-06	7.8902e-05	3.3538
GINS2	0.41342	6.0103	3.2354	0.0023778	0.0080164	-2.0771
PLAG1	0.41339	6.6964	3.2	0.0026245	0.0087337	-2.1692
GNG11	0.41284	11.043	4.0241	0.00023511	0.001242	0.11114
LOXL2	0.41257	6.1757	6.0486	3.4463e-07	6.1143e-06	6.4305
ITGAX	0.41117	6.6839	5.7903	8.0878e-07	1.235e-05	5.5982
SLC52A2	0.41116	7.5616	5.5253	1.9361e-06	2.4972e-05	4.7478
ARHGAP45	0.41021	7.2617	6.6583	4.5985e-08	1.2273e-06	8.3987
NEFL	0.41011	4.8967	2.8295	0.0071349	0.019596	-3.0941
BEAN1	0.40959	5.6159	2.9561	0.0051041	0.014984	-2.7862
TRIB3	0.40924	6.8957	4.0126	0.00024356	0.0012758	0.077439
ASUN	0.40875	8.0621	5.0895	8.0522e-06	7.8496e-05	3.3627
CEP76	0.40857	5.7018	4.6609	3.2061e-05	0.00024763	2.0254
APRT	0.40812	8.9533	3.7553	0.00052922	0.0023688	-0.66154
MCUB	0.40784	8.2608	2.6548	0.011181	0.028153	-3.5037
BGN	0.40764	9.2991	3.1146	0.0033228	0.010553	-2.3888
MYOF	0.40666	10.285	2.8962	0.0059854	0.017024	-2.9328
FAM89B	0.40664	8.9823	7.0376	1.3204e-08	4.4958e-07	9.6194
MICA	0.40609	8.9731	2.8262	0.0071965	0.019724	-3.102
STX4	0.40579	8.1847	5.1851	5.8995e-06	6.1388e-05	3.6646
MARS	0.40557	9.4025	5.4298	2.65e-06	3.2291e-05	4.4424
HLA-DPB1	0.40532	10.461	3.0633	0.0038226	0.01183	-2.5188
PLSCR1	0.40532	9.8981	2.8335	0.0070607	0.019449	-3.0845
PCOLCE	0.40525	7.1259	3.3933	0.0015226	0.0055822	-1.6596
TBXAS1	0.40472	7.9255	4.1846	0.0001435	0.00083634	0.58353
GMPPB	0.40391	8.3102	5.4966	2.1275e-06	2.6917e-05	4.656
SP110	0.4033	7.6467	3.8766	0.00036786	0.0017818	-0.31578
TMPRSS3	0.40316	5.5729	3.4939	0.0011402	0.0043957	-1.3876
RPLP2	0.4022	11.342	4.1379	0.0001658	0.00093684	0.44517
FILIP1L	0.40209	8.0381	2.6701	0.010755	0.027302	-3.4684
LAT	0.40189	6.2357	4.8914	1.5296e-05	0.00013314	2.7408
CCDC85B	0.40089	7.2905	5.354	3.3967e-06	3.9619e-05	4.2009
HLA-DRB1	0.40067	12.878	4.8126	1.9719e-05	0.00016422	2.4951
RNF7	0.40054	9.0923	5.6072	1.4788e-06	1.9964e-05	5.0102
MAN1B1	0.40019	8.7764	3.7975	0.00046664	0.00215	-0.542
DONSON	0.39989	5.7665	3.5354	0.001011	0.0039976	-1.2741
EXT1	0.39986	8.892	3.8319	0.00042085	0.0019774	-0.44383
IL2RG	0.3997	7.4878	3.3018	0.0019737	0.0068974	-1.9029
GLA	0.39921	9.0776	5.6619	1.2354e-06	1.7601e-05	5.1854
TGM2	0.39882	6.7672	6.6966	4.0531e-08	1.0975e-06	8.5222
CCND2	0.39872	6.1695	4.2335	0.00012331	0.0007358	0.72891
DDX49	0.39789	7.4525	5.344	3.5103e-06	4.0501e-05	4.1689
BZW2	0.39741	8.9148	3.3125	0.001915	0.0067569	-1.8746
TPST1	0.39718	8.382	4.5473	4.6017e-05	0.0003332	1.6767
H2AFZ	0.39703	11.284	5.0607	8.8427e-06	8.4526e-05	3.2718
PRKCB	0.39694	5.7903	3.5024	0.0011125	0.0043103	-1.3643
EXOSC10	0.39677	7.892	4.5116	5.1531e-05	0.00036681	1.5677
DAAM2	0.39654	9.5999	3.3801	0.0015809	0.0057639	-1.6949
RFXANK	0.39641	7.8171	3.5681	0.0009191	0.003704	-1.1842
TES	0.39641	7.3855	3.0295	0.0041893	0.012721	-2.6037
CD2	0.39638	6.725	4.3347	8.9943e-05	0.00057091	1.0318
ST3GAL5	0.39584	7.2367	3.3827	0.0015693	0.0057317	-1.688
FARSA	0.39583	7.8716	4.9341	1.3327e-05	0.0001196	2.8743
CHPF2	0.39558	8.058	5.3345	3.6207e-06	4.15e-05	4.1388
MEF2A	0.39543	8.4997	5.0952	7.9068e-06	7.7434e-05	3.3803
DOHH	0.394	6.54	4.2565	0.00011478	0.00069433	0.79762
C10orf2	0.3938	6.4254	5.3083	3.9452e-06	4.4341e-05	4.0554
CSTF2T	0.3934	8.0801	6.2587	1.7208e-07	3.5257e-06	7.1088
C1orf54	0.39332	9.8075	3.5734	0.00090506	0.0036618	-1.1697
NGFR	0.39306	5.3796	3.832	0.00042073	0.0019774	-0.44354
RASIP1	0.39297	7.7724	3.1437	0.0030673	0.009901	-2.3144
FHOD1	0.39293	8.0007	5.0821	8.2507e-06	7.9843e-05	3.339
C19orf60	0.39135	8.4093	3.834	0.00041822	0.0019671	-0.43787
RNASET2	0.39119	10.255	5.4435	2.5335e-06	3.1242e-05	4.4861
CD151	0.39107	10.215	3.1662	0.0028822	0.0093985	-2.2564
CLIC3	0.38968	5.0673	3.7782	0.0004943	0.0022407	-0.59673
ST8SIA4	0.38966	4.8698	4.5879	4.0454e-05	0.00030019	1.801
GSTO1	0.38951	11.497	5.0677	8.645e-06	8.3e-05	3.2938
UTP11	0.3894	8.5843	4.9719	1.1795e-05	0.00010793	2.9926
EXOSC8	0.38923	7.357	4.1005	0.00018604	0.0010261	0.33496
MRAS	0.38901	6.9721	5.539	1.8507e-06	2.4209e-05	4.7917
RGS3	0.38892	8.232	5.1813	5.9726e-06	6.1871e-05	3.6526
LILRA1	0.38887	4.7448	4.4453	6.3532e-05	0.00043194	1.3661
ZNF281	0.3883	6.8976	4.854	1.726e-05	0.00014746	2.6239
KCNE4	0.38771	5.7671	4.0625	0.00020902	0.0011281	0.22355
ZEB2	0.38608	6.7173	3.2566	0.0022409	0.0076693	-2.0217
LRRC59	0.38566	10.726	5.2839	4.2727e-06	4.7162e-05	3.9779
C9orf3	0.38519	10.613	2.9736	0.0048708	0.014421	-2.743
STIL	0.38494	5.3259	4.5589	4.4351e-05	0.00032367	1.7123
REXO4	0.38486	7.7302	4.3652	8.1734e-05	0.00052932	1.1238
RNF125	0.38467	5.4559	5.6428	1.3152e-06	1.8465e-05	5.1244
MON1B	0.38408	7.1934	5.6032	1.4988e-06	2.019e-05	4.9971
CARD8	0.38253	8.1379	4.3133	9.6147e-05	0.00060367	0.96771
PPP4C	0.38187	9.0333	3.9839	0.00026581	0.0013752	-0.0060232
PID1	0.38184	5.4685	3.0854	0.0035994	0.011258	-2.463
C12orf4	0.38164	6.4249	4.4347	6.5701e-05	0.00044316	1.3338
TLE3	0.38141	5.8817	8.3997	1.6259e-10	1.7715e-08	13.922
HSPB2	0.38107	8.6056	3.1559	0.0029653	0.0096322	-2.2829
DNM3	0.38105	6.44	3.0237	0.0042562	0.012885	-2.6183
BYSL	0.38054	7.5399	4.5022	5.3081e-05	0.00037554	1.5391
PLPP2	0.38037	5.3716	3.4843	0.0011721	0.0044986	-1.4136
TRIM22	0.38029	10.491	3.7874	0.0004809	0.0021906	-0.5706
CLIP2	0.37988	6.3864	4.3981	7.372e-05	0.00048835	1.223
ABCA3	0.37855	8.1143	2.9741	0.0048648	0.014412	-2.7419
OSTF1	0.37853	10.249	3.9247	0.00031814	0.0015815	-0.17744
LBR	0.37821	9.7684	3.0584	0.0038734	0.011969	-2.531
TPST2	0.37772	9.5148	2.5459	0.014678	0.035409	-3.7496
SHC1	0.377	8.614	6.2174	1.9724e-07	3.9452e-06	6.9754
LAMC1	0.37699	9.9971	4.3222	9.351e-05	0.00058951	0.99443
SPDL1	0.37688	6.8446	3.9261	0.00031682	0.0015766	-0.17345
MCOLN1	0.37619	7.5342	5.2403	4.9275e-06	5.3062e-05	3.8394
TTLL7	0.37578	5.6432	5.7098	1.0547e-06	1.5371e-05	5.3394
FLI1	0.37568	6.6844	4.2545	0.0001155	0.0006973	0.79166
IL15RA	0.37545	8.2669	3.9906	0.00026039	0.0013525	0.013637
ARNTL2	0.37544	4.9195	3.688	0.00064622	0.0027758	-0.85097
SNN	0.37509	6.3364	7.0787	1.1542e-08	4.0798e-07	9.7511
EFHD2	0.375	7.13	5.0199	1.0096e-05	9.4249e-05	3.1434
AXL	0.37469	9.3085	2.758	0.0085897	0.022754	-3.2638
STX10	0.37435	8.4387	6.145	2.5061e-07	4.7174e-06	6.7415
CEBPG	0.3728	6.416	3.5641	0.00092984	0.0037375	-1.1952
AGPAT4	0.37275	6.8012	4.8412	1.7984e-05	0.00015238	2.5841
ADSL	0.37161	9.7845	5.1175	7.3521e-06	7.3339e-05	3.4509
WAPL	0.37134	8.8648	6.1252	2.6753e-07	4.9652e-06	6.6777
RAB31	0.371	9.8502	3.6872	0.00064781	0.0027771	-0.8533
IL10RB	0.37092	7.7748	4.1573	0.00015613	0.0008942	0.50272
PDGFRA	0.37071	8.3839	2.9591	0.0050644	0.014899	-2.779
STK17A	0.37039	5.7996	5.3013	4.0365e-06	4.5039e-05	4.0332
EEF1D	0.36975	11.853	3.5267	0.0010369	0.0040797	-1.298
SLC1A3	0.3695	5.8293	2.9634	0.0050055	0.014758	-2.7682
EMILIN1	0.3694	5.9207	3.0886	0.0035681	0.01119	-2.4549
DNASE1L1	0.36917	8.4887	5.1305	7.0484e-06	7.1261e-05	3.4918
TLR4	0.36903	6.7513	3.7949	0.00047019	0.0021589	-0.54921
SAP30BP	0.36826	8.2613	4.0366	0.00022627	0.001206	0.14775
PTEN	0.36785	7.8748	4.6857	2.9616e-05	0.00023126	2.1019
DCK	0.36752	7.1569	4.2327	0.00012362	0.00073674	0.72646
HLA-DPA1	0.36684	12.286	4.3288	9.1611e-05	0.00057952	1.0141
ICAM1	0.36674	7.8785	4.8634	1.6744e-05	0.00014345	2.6533
FCMR	0.36622	6.3171	4.3328	9.0473e-05	0.00057388	1.0261
ATAD2B	0.36619	6.7834	4.0593	0.00021111	0.001136	0.21404
B4GALT5	0.36593	9.1063	4.476	5.7667e-05	0.00040034	1.4593
PDIA4	0.36553	9.0083	5.6207	1.4145e-06	1.9436e-05	5.0535
MDK	0.3651	5.918	5.3268	3.7136e-06	4.225e-05	4.1142
BTN2A2	0.36507	8.066	4.4373	6.5162e-05	0.00044081	1.3417
IL21R	0.36495	5.2392	5.2668	4.5183e-06	4.9403e-05	3.9236
WDR4	0.36481	6.0982	5.1684	6.2301e-06	6.4032e-05	3.6116
KIF18B	0.36376	5.6764	4.9923	1.1039e-05	0.00010193	3.0568
CDC25B	0.36366	9.7027	3.3662	0.0016444	0.0059534	-1.7318
TNFAIP6	0.36341	4.748	2.6355	0.01174	0.029313	-3.5479
ADAM10	0.3629	7.3803	3.7504	0.00053702	0.0023922	-0.67542
STYXL1	0.36289	8.6823	3.6676	0.00068648	0.0029176	-0.90823
UBA7	0.36256	9.1616	3.2813	0.0020909	0.0072334	-1.9569
TRIM9	0.36242	5.0832	4.5489	4.5781e-05	0.00033227	1.6817
BIRC5	0.36237	5.6341	4.8405	1.8024e-05	0.00015258	2.582
NR1H3	0.36207	7.1524	3.1181	0.0032909	0.010478	-2.3798
LMAN2	0.36188	9.1307	4.856	1.715e-05	0.00014665	2.6301
P3H4	0.36163	6.5202	4.5924	3.9871e-05	0.00029658	1.815
GLRX3	0.36143	9.2196	5.2171	5.3146e-06	5.5985e-05	3.7659
PRMT7	0.36141	6.8542	3.0387	0.0040867	0.012473	-2.5807
MTERF1	0.36132	6.3699	4.6372	3.457e-05	0.00026431	1.9526
PPM1F	0.36128	10.008	3.4617	0.0012514	0.0047301	-1.4752
C2	0.36127	6.9685	3.3063	0.0019488	0.0068389	-1.891
CENPE	0.36124	5.4758	3.3125	0.0019152	0.0067569	-1.8747
ATP13A3	0.36102	7.9311	3.323	0.0018592	0.0066045	-1.8469
MGP	0.361	12.107	3.2597	0.002222	0.0076144	-2.0137
GYPC	0.36048	8.9972	3.6616	0.00069869	0.0029546	-0.92492
WNT5B	0.36023	6.691	2.8831	0.0061969	0.017524	-2.9648
CD99	0.36011	11.041	4.0354	0.0002271	0.0012094	0.14427
RPS19	0.35963	13.114	4.7192	2.6609e-05	0.0002108	2.2054
TRIM24	0.35945	7.7326	3.9616	0.00028449	0.0014492	-0.070834
SSNA1	0.3591	8.1534	5.6512	1.2795e-06	1.8118e-05	5.1512
ITK	0.3591	5.0452	5.1244	7.1891e-06	7.2131e-05	3.4727
HYAL2	0.35886	10.169	2.8873	0.0061285	0.017362	-2.9546
LCAT	0.35871	6.0952	3.8503	0.00039821	0.0018944	-0.39123
STS	0.35849	6.9098	3.9385	0.00030509	0.0015314	-0.13749
CDC37	0.35825	8.808	7.0423	1.3005e-08	4.4683e-07	9.6343
PSRC1	0.3571	6.0703	4.0147	0.00024199	0.001269	0.083625
TP53	0.35668	5.7572	4.7281	2.586e-05	0.00020611	2.2329
CEP83	0.35601	5.7527	3.2461	0.0023081	0.007824	-2.0493
BCAP29	0.35584	7.6095	4.5299	4.8629e-05	0.0003496	1.6235
TESC	0.35548	6.1681	4.219	0.000129	0.00076288	0.68563
TUBA1B	0.35547	13.421	5.5087	2.0451e-06	2.6016e-05	4.6945
NADSYN1	0.35465	7.6587	2.9105	0.0057632	0.016509	-2.8981
PRKCH	0.3543	9.2312	2.9535	0.0051398	0.015054	-2.7926
ANO1	0.35397	4.8964	4.3771	7.8734e-05	0.0005137	1.1597
HLA-J	0.35373	10.022	3.3763	0.0015981	0.0058178	-1.7051
ZNF267	0.35348	6.6566	3.5361	0.0010089	0.0039929	-1.2722
PLXND1	0.35337	9.2278	4.3198	9.4232e-05	0.00059301	0.98703
DHRS9	0.35282	5.8671	3.3546	0.0016998	0.0061275	-1.7629
CUEDC2	0.35243	10.254	4.2718	0.00010946	0.00067112	0.84319
MMD	0.3523	8.4749	2.6383	0.011657	0.029143	-3.5415
PCSK5	0.35224	6.2426	2.7143	0.0096104	0.024882	-3.3662
BOP1	0.35223	6.7454	4.2829	0.00010573	0.00065104	0.87649
USP3	0.35217	9.197	4.3957	7.4266e-05	0.00049092	1.2159
IRAK1	0.35188	9.2816	3.5006	0.0011184	0.0043282	-1.3693
OLFML1	0.35178	8.5562	3.1906	0.0026938	0.0089256	-2.1935
DRAP1	0.35068	7.2606	6.0343	3.6135e-07	6.3384e-06	6.3843
ADORA3	0.35058	6.1436	3.1493	0.0030205	0.0097655	-2.3001
HOXB2	0.35051	9.5964	4.7964	2.0775e-05	0.00017132	2.4446
UNC5B	0.35046	8.7994	3.9844	0.00026535	0.0013739	-0.0043751
TRIM5	0.35014	5.9446	3.6788	0.00066398	0.0028389	-0.87666
FADS1	0.34982	7.5872	5.2952	4.1173e-06	4.5707e-05	4.0139
SHC2	0.34938	7.2448	3.4641	0.0012426	0.0047009	-1.4686
LPCAT1	0.34891	9.0298	4.5238	4.9572e-05	0.00035507	1.605
HRH1	0.34883	6.7575	2.6498	0.011323	0.028433	-3.5151
RGS16	0.34853	6.4764	4.264	0.00011213	0.00068363	0.82008
KCNN4	0.34822	5.3817	4.3319	9.0715e-05	0.00057502	1.0236
AUP1	0.34776	9.1576	6.1731	2.284e-07	4.4067e-06	6.8322
MERTK	0.34766	6.5562	2.436	0.019198	0.043823	-3.9903
PUS7	0.3475	7.0434	3	0.0045376	0.013569	-2.6775
PSMD8	0.34738	10.111	4.4391	6.4789e-05	0.0004386	1.3472
E2F3	0.34737	6.7715	4.9422	1.2981e-05	0.00011694	2.8997
RBX1	0.34733	10.773	4.9345	1.331e-05	0.00011956	2.8755
ISYNA1	0.34729	8.2395	3.118	0.0032914	0.010478	-2.3799
TTC13	0.34598	7.5595	3.9397	0.00030404	0.0015278	-0.13422
CDKN2C	0.3458	7.1754	4.3781	7.8487e-05	0.00051296	1.1627
QSOX1	0.34561	9.1661	2.6169	0.012299	0.030383	-3.59
TMEM258	0.34511	11.669	5.0703	8.5709e-06	8.2683e-05	3.3021
MED28	0.34481	7.6505	4.4006	7.3145e-05	0.00048524	1.2305
GTPBP8	0.34462	7.9265	5.348	3.4642e-06	4.0103e-05	4.1818
TNFRSF10B	0.34459	7.272	3.8127	0.00044585	0.0020642	-0.4987
S100A3	0.34431	5.6313	3.5752	0.00090016	0.0036497	-1.1645
TEFM	0.34428	8.3562	3.9408	0.00030299	0.0015258	-0.13091
FOLR2	0.34415	7.4129	2.5878	0.013227	0.032338	-3.6558
SYK	0.34366	6.2551	2.9725	0.004885	0.014458	-2.7457
PSMB3	0.34323	10.225	2.6811	0.010459	0.026727	-3.4431
CYTH2	0.34321	8.7601	5.1819	5.9608e-06	6.1818e-05	3.6545
RGL2	0.34296	9.3263	4.6637	3.1768e-05	0.00024558	2.0342
NOC3L	0.34276	7.9265	4.4774	5.742e-05	0.00039952	1.4635
LTA4H	0.34242	11.084	4.0169	0.00024031	0.0012623	0.090258
GADD45GIP1	0.34203	6.4624	4.1438	0.0001628	0.00092437	0.46268
TNFRSF11A	0.34171	4.8115	5.6165	1.4345e-06	1.9606e-05	5.0398
TK1	0.34143	6.4474	3.9078	0.00033485	0.0016495	-0.22623
PRDX4	0.34129	10.565	4.1229	0.00017364	0.00096987	0.40097
LILRA2	0.34129	5.3148	3.8758	0.00036882	0.0017855	-0.31824
ARPC5	0.34106	11.416	6.0657	3.2571e-07	5.8914e-06	6.4856
NOP10	0.34064	10.54	4.7972	2.072e-05	0.00017102	2.4472
FIBP	0.34063	9.6434	5.9739	4.4115e-07	7.4689e-06	6.1895
IQCG	0.34059	7.3846	2.7169	0.0095466	0.024758	-3.3601
ABCA7	0.34058	5.8402	4.1403	0.00016457	0.00093217	0.45229
RARS	0.3401	9.9536	4.1766	0.00014711	0.00085309	0.55972
ITPR3	0.3399	7.357	3.8662	0.00037964	0.0018264	-0.34578
CHMP4A	0.33947	9.861	3.4309	0.0013672	0.0050951	-1.5584
RHBDD3	0.33909	7.2398	4.8089	1.9954e-05	0.00016588	2.4836
CBFB	0.33901	8.4316	4.9173	1.4071e-05	0.0001247	2.8217
PUS1	0.33865	6.11	4.4653	5.9642e-05	0.00041128	1.4269
TMEM158	0.3385	6.0194	2.8707	0.0064025	0.017997	-2.9948
TUBB	0.33842	10.238	3.2142	0.0025227	0.0084434	-2.1323
MMS19	0.33804	8.4135	3.6331	0.00075985	0.0031689	-1.0043
NDUFS6	0.33767	11.447	3.6964	0.00063033	0.0027189	-0.82738
UBE2L6	0.3376	10.75	3.3385	0.0017793	0.0063696	-1.8058
PSMC3	0.33756	9.027	3.7035	0.00061718	0.0026797	-0.80739
TNFAIP1	0.3372	9.1873	5.2132	5.3821e-06	5.6448e-05	3.7537
BFSP1	0.33698	6.7291	3.2463	0.0023068	0.0078226	-2.0488
AK5	0.33632	6.6335	2.8106	0.007494	0.020347	-3.1391
OIP5	0.33627	4.7068	3.0035	0.0044948	0.013476	-2.6688
PTRF	0.33602	8.3918	4.6684	3.1304e-05	0.0002426	2.0484
NUP88	0.33594	8.4318	4.5177	5.0547e-05	0.00036092	1.5863
FKBP1A	0.33535	8.0575	4.026	0.00023375	0.0012356	0.1167
TRIM37	0.33531	8.9895	4.1282	0.00017083	0.0009571	0.41654
LY6G5C	0.33511	6.2482	4.4764	5.759e-05	0.00040011	1.4606
INPP5A	0.3345	10.322	5.0676	8.6486e-06	8.3e-05	3.2934
CAV2	0.33342	8.679	2.4617	0.018042	0.04174	-3.9348
GPSM2	0.33312	5.8012	4.8051	2.0199e-05	0.00016762	2.4718
ERGIC2	0.33248	8.4594	3.5032	0.0011099	0.004306	-1.3622
ZSCAN16	0.33239	6.1013	4.4658	5.956e-05	0.00041102	1.4282
PAFAH1B3	0.33221	7.6051	3.4075	0.0014617	0.0053973	-1.6212
DOCK6	0.33172	7.5417	5.0219	1.0031e-05	9.3834e-05	3.1496
PRCP	0.33169	12.005	3.3759	0.0015999	0.005822	-1.7061
BORA	0.33164	5.6111	4.2133	0.00013129	0.00077295	0.66878
PARVB	0.33093	7.2609	4.5065	5.2368e-05	0.00037192	1.5522
EPHA2	0.32959	7.9713	2.6455	0.011447	0.02866	-3.525
CD55	0.32955	8.7396	3.0544	0.0039163	0.012069	-2.5412
NOTCH1	0.32926	7.146	3.4356	0.0013487	0.0050322	-1.5456
KHNYN	0.32922	8.7858	6.6135	5.3315e-08	1.383e-06	8.2541
NECAP2	0.32896	9.6984	5.8373	6.927e-07	1.0836e-05	5.7493
SDS	0.32875	5.6503	3.331	0.0018173	0.006478	-1.8256
NUP93	0.32867	9.2471	5.0077	1.0502e-05	9.7264e-05	3.1051
C1orf216	0.32859	8.9408	3.3407	0.001768	0.0063388	-1.7998
CD74	0.32852	11.231	3.1908	0.0026923	0.0089238	-2.1929
SLC16A6	0.32827	4.8221	4.1049	0.00018354	0.0010154	0.3479
MAPK13	0.32817	6.2397	3.0976	0.0034808	0.010983	-2.4319
TNIP2	0.32815	10.04	5.8697	6.2231e-07	9.8855e-06	5.8538
44443	0.32793	6.543	5.755	9.0868e-07	1.3639e-05	5.4847
FAM173A	0.32788	7.6614	3.1935	0.0026723	0.0088672	-2.186
NHP2	0.32786	9.4772	3.9657	0.0002809	0.0014333	-0.058721
S100A6	0.32742	11.364	2.5388	0.014938	0.035848	-3.7654
STOML1	0.32705	8.0356	4.6417	3.4078e-05	0.00026169	1.9665
CYB5R4	0.32702	6.6724	2.6333	0.011803	0.029452	-3.5528
RPL39L	0.32698	6.1223	4.8652	1.6645e-05	0.00014273	2.659
DDX41	0.32668	9.3743	4.4348	6.5672e-05	0.00044316	1.3342
PPP2R3C	0.32657	8.5275	3.6229	0.00078282	0.0032437	-1.0325
ADGRG2	0.32644	4.9685	3.1941	0.0026681	0.0088563	-2.1845
SCAND1	0.32605	8.7286	2.7625	0.0084914	0.022552	-3.2533
KIF2C	0.3258	5.8655	4.1211	0.00017461	0.00097472	0.39562
TLE2	0.32559	7.424	3.3713	0.0016211	0.0058874	-1.7184
NUP155	0.32558	7.2256	4.0661	0.00020675	0.0011197	0.234
ENG	0.32511	9.1884	3.2355	0.0023774	0.0080164	-2.0769
RNF144A	0.32456	8.7114	3.5835	0.00087857	0.0035812	-1.1416
DDAH2	0.32453	9.723	3.9366	0.00030691	0.0015389	-0.14318
MALT1	0.32371	6.9645	4.0462	0.00021976	0.0011744	0.17565
NABP1	0.3237	5.039	3.6759	0.00066985	0.0028587	-0.885
DGKA	0.32352	5.6177	6.1944	2.1282e-07	4.1935e-06	6.9012
LIMA1	0.32311	9.3881	3.1783	0.0027877	0.0091581	-2.2254
GPRC5B	0.32306	8.2817	3.7237	0.0005813	0.0025538	-0.7506
STK38L	0.32284	8.5241	3.5121	0.0010816	0.004217	-1.3379
MRPL17	0.3227	9.2986	5.0162	1.0217e-05	9.5112e-05	3.1317
CCT2	0.32243	9.9789	3.9819	0.0002674	0.0013823	-0.011715
NAA15	0.32239	5.987	4.6644	3.1697e-05	0.00024524	2.0364
TMEM165	0.32223	9.5583	3.8628	0.0003835	0.0018385	-0.3554
GSDMD	0.3216	8.8601	3.1492	0.0030211	0.0097655	-2.3002
GNB2	0.32155	9.5542	5.6358	1.3459e-06	1.88e-05	5.1019
AMMECR1	0.32106	6.9527	4.9496	1.2674e-05	0.00011451	2.9229
LMNA	0.32102	9.0648	3.959	0.00028666	0.0014579	-0.078091
SSR4	0.32073	11.02	4.8851	1.561e-05	0.00013554	2.7212
GUCY1B3	0.32022	8.2072	2.8561	0.0066544	0.018566	-3.0302
CCT7	0.32015	11.145	5.4252	2.6899e-06	3.265e-05	4.4278
TARS	0.3199	9.0789	3.9775	0.00027105	0.0013949	-0.024675
CHFR	0.31946	7.8021	4.9186	1.4012e-05	0.00012453	2.8258
FLNA	0.31944	9.2957	4.1325	0.00016858	0.00094848	0.42927
EDF1	0.31932	10.534	3.9774	0.00027112	0.0013949	-0.024903
SUGP1	0.31922	8.155	4.8394	1.8091e-05	0.00015287	2.5784
RNASEH2A	0.31882	7.0749	4.0081	0.0002469	0.0012897	0.064418
UTP14A	0.31854	6.8006	4.9298	1.3513e-05	0.00012103	2.8608
ROBO3	0.31767	5.8762	3.8252	0.00042943	0.0020065	-0.46302
GOLT1B	0.3175	7.6682	3.853	0.00039499	0.0018836	-0.38349
EMG1	0.31747	9.3198	5.2875	4.2227e-06	4.6723e-05	3.9894
GAR1	0.31722	9.256	4.9089	1.4459e-05	0.00012741	2.7953
FANCG	0.31705	7.9138	3.6966	0.00063007	0.0027189	-0.82699
BIN3	0.31623	8.0902	3.0115	0.0043989	0.013235	-2.6488
SMPD2	0.31598	7.0206	3.9795	0.00026936	0.0013881	-0.018672
SEC61G	0.31547	9.9267	5.6465	1.2993e-06	1.8335e-05	5.1362
CD4	0.31544	7.9633	3.5284	0.0010316	0.0040653	-1.2932
PLK3	0.31539	6.8031	3.3176	0.0018875	0.0066897	-1.8611
TMEM35B	0.31534	9.3457	4.1758	0.00014748	0.00085418	0.5573
PSMA3	0.31533	10.21	4.4764	5.7588e-05	0.00040011	1.4607
BMS1	0.31489	8.7306	4.3544	8.4544e-05	0.0005441	1.0913
TRIAP1	0.31478	9.6892	4.583	4.1081e-05	0.00030339	1.7861
CYP20A1	0.31448	6.7071	3.6301	0.00076661	0.0031908	-1.0127
TMEM132A	0.31394	6.5818	4.1286	0.00017061	0.00095646	0.41777
AEN	0.31383	7.1402	5.4166	2.7671e-06	3.3411e-05	4.4003
ITGA10	0.31369	7.0187	2.8449	0.0068521	0.019022	-3.057
LMNB2	0.31349	7.2114	4.2954	0.0001017	0.00063296	0.9138
TNIP1	0.31334	9.8009	3.3911	0.001532	0.0056124	-1.6654
KCND1	0.31271	5.8329	4.5562	4.4742e-05	0.00032626	1.7038
RASGRP2	0.31263	5.6301	4.0088	0.00024636	0.0012876	0.066505
NOTCH4	0.31258	8.0051	2.6031	0.012733	0.03132	-3.6214
PTRH2	0.31154	8.4488	4.3785	7.8404e-05	0.00051278	1.1637
GPR4	0.31087	7.2573	4.3197	9.4257e-05	0.00059301	0.98678
ARHGAP4	0.31054	6.4123	5.3529	3.4098e-06	3.9671e-05	4.1972
KARS	0.31053	11.779	4.2601	0.00011353	0.00068943	0.80819
CCT3	0.3105	11.245	4.7991	2.059e-05	0.00017025	2.4533
SLC35A1	0.31029	9.8568	4.1038	0.00018416	0.001017	0.34468
COG4	0.31013	9.1079	3.0626	0.0038295	0.011846	-2.5205
CCDC88A	0.30963	5.3751	6.7898	2.9822e-08	8.655e-07	8.8223
LDLRAP1	0.30955	7.972	5.3321	3.649e-06	4.1653e-05	4.1313
MGAT1	0.30947	10.224	4.6147	3.714e-05	0.00027918	1.8834
ATP13A1	0.30906	8.0513	3.7546	0.0005304	0.002373	-0.66366
EIF3G	0.30895	10.91	3.5203	0.0010562	0.0041408	-1.3154
ICAM4	0.30831	4.9808	2.8158	0.0073938	0.020151	-3.1268
SARS	0.30828	9.7619	4.2663	0.00011135	0.00068007	0.82677
LTBP1	0.30813	7.8851	2.6063	0.01263	0.031084	-3.614
FLII	0.30812	8.7181	5.8501	6.6403e-07	1.0441e-05	5.7905
ARPC4	0.30806	8.7259	5.546	1.8086e-06	2.3725e-05	4.8141
KIAA0101	0.30787	6.4826	2.6275	0.011976	0.029743	-3.5659
SRM	0.30707	8.0809	3.9202	0.00032249	0.0015996	-0.19036
MATK	0.30697	6.5938	2.9246	0.0055522	0.016033	-2.8637
C1orf174	0.30693	7.7213	4.2223	0.00012767	0.00075596	0.6956
PRKD2	0.30674	8.9987	3.3703	0.0016257	0.0058971	-1.7211
FLVCR2	0.30632	6.893	2.5319	0.015195	0.036361	-3.7807
BIRC3	0.30611	5.6615	2.4282	0.01956	0.044506	-4.0069
DPAGT1	0.30595	8.4778	3.0093	0.004425	0.013301	-2.6543
LAGE3	0.3055	8.6196	3.9403	0.00030343	0.0015268	-0.1323
PAQR4	0.30541	6.212	5.4866	2.1988e-06	2.7592e-05	4.624
CEP131	0.30536	6.3327	3.1226	0.0032506	0.010374	-2.3684
IFITM2	0.30525	12.108	3.7246	0.00057985	0.0025486	-0.74823
ZNF593	0.30515	7.7137	2.4963	0.01658	0.038962	-3.8591
MRPL28	0.30509	8.8511	2.9214	0.0055989	0.016133	-2.8714
MVP	0.30507	9.6684	5.1617	6.367e-06	6.5082e-05	3.5905
GIMAP6	0.30445	10.319	2.7605	0.0085338	0.022626	-3.2579
CCDC22	0.30425	6.9139	3.8818	0.00036219	0.0017608	-0.30098
NBEAL2	0.30375	5.4494	4.5653	4.3462e-05	0.00031819	1.7318
SCG2	0.30366	5.0021	4.0805	0.0001978	0.0010794	0.27633
SPCS3	0.30365	8.9551	4.7496	2.4138e-05	0.00019371	2.2996
GGT5	0.30358	6.5627	2.3944	0.021214	0.047512	-4.0793
DOK1	0.30342	7.4021	5.8191	7.3554e-07	1.1418e-05	5.6908
HEY2	0.30296	5.77	3.1243	0.0032351	0.010341	-2.3639
WRAP73	0.30294	7.2149	2.7224	0.0094128	0.024487	-3.3472
AP1S2	0.30293	9.6732	2.9352	0.0053977	0.01567	-2.8377
CH25H	0.30288	4.7526	3.8429	0.00040718	0.0019285	-0.4124
DNMT3B	0.3023	6.4295	3.7028	0.00061859	0.0026833	-0.80956
INPP5F	0.3018	7.6648	3.6717	0.00067808	0.0028886	-0.89657
CACNB3	0.30167	7.7667	4.8523	1.7356e-05	0.000148	2.6186
STX18	0.30141	9.6695	4.6752	3.0631e-05	0.00023858	2.0694
PSMC4	0.30114	9.0601	5.4916	2.1631e-06	2.7292e-05	4.6399
CARS2	0.30112	8.4243	3.0048	0.0044794	0.013434	-2.6656
TGFB1I1	0.3009	9.8192	2.9114	0.0057491	0.016496	-2.8958
TMEM39B	0.30061	7.7148	3.952	0.00029286	0.0014861	-0.098505
CCNE1	0.30055	6.7365	4.2569	0.00011464	0.00069394	0.7988
KEAP1	0.30037	9.2401	3.7273	0.00057523	0.002532	-0.74065
FAM216A	0.30022	5.9401	3.5569	0.0009495	0.0037937	-1.2149
HNRNPAB	0.30007	10.92	3.7892	0.00047831	0.0021821	-0.56549
NXN	0.29985	10.86	3.5145	0.0010741	0.0041989	-1.3313
H2AFY	0.29983	9.4991	3.7171	0.00059288	0.0025936	-0.76931
ALAS1	0.29962	8.8868	4.7194	2.659e-05	0.0002108	2.2061
RBM12	0.29962	7.8536	4.2792	0.00010697	0.0006578	0.86529
TSR1	0.29943	6.5774	5.5658	1.6947e-06	2.2485e-05	4.8775
PMS1	0.2994	8.0797	3.4699	0.0012221	0.0046481	-1.4529
PANK2	0.29924	9.913	4.7827	2.1705e-05	0.00017757	2.4023
TBCB	0.2992	11.169	5.5976	1.5266e-06	2.046e-05	4.9792
SNRPD2	0.29866	10.797	2.5993	0.012854	0.031585	-3.6299
RHBDF1	0.29829	8.1177	4.7565	2.3607e-05	0.00019011	2.3211
PCNA	0.29805	9.887	3.8361	0.00041557	0.0019599	-0.43183
RASSF1	0.29794	8.4059	4.0277	0.00023255	0.0012322	0.12161
PIP4K2A	0.29755	9.0899	3.838	0.0004133	0.0019518	-0.4266
MPZL2	0.29755	5.629	3.0457	0.0040095	0.012299	-2.563
NOP16	0.29752	6.4394	3.1403	0.0030961	0.0099835	-2.323
ATXN3	0.2975	5.9177	4.2171	0.00012977	0.00076644	0.67995
ATP6V0A2	0.29739	6.4955	3.0156	0.0043499	0.013122	-2.6385
POLR2E	0.29702	8.5617	3.0154	0.0043532	0.013128	-2.6392
TSPAN5	0.29697	8.0546	2.4295	0.019501	0.044407	-4.0043
NADK	0.29662	6.7453	6.1846	2.1988e-07	4.305e-06	6.8693
ST6GAL1	0.29626	8.5005	3.1874	0.0027177	0.0089793	-2.2017
IFT20	0.29596	9.1413	3.037	0.0041055	0.012515	-2.585
TRAF1	0.29575	6.2097	3.0229	0.0042651	0.012904	-2.6203
RAP2B	0.29551	5.3844	4.8418	1.7952e-05	0.00015225	2.5859
SAMD9	0.29533	6.1414	2.8248	0.0072216	0.019769	-3.1052
FLOT1	0.29519	10.678	6.5029	7.6797e-08	1.8618e-06	7.8973
TLR5	0.29519	5.9948	2.8447	0.0068551	0.019024	-3.0575
PSMB6	0.29512	10.65	3.2708	0.0021533	0.0074133	-1.9844
UBXN8	0.29492	7.6383	4.2706	0.00010985	0.00067256	0.83979
DPH5	0.29466	6.3341	4.2696	0.00011019	0.0006736	0.83679
FEZ1	0.2943	8.3905	4.2946	0.00010193	0.00063394	0.91166
HBD	0.29428	5.833	3.5362	0.0010087	0.0039929	-1.272
KIAA0355	0.29427	10.363	2.6552	0.011169	0.028136	-3.5027
BIN2	0.29409	6.3042	3.4255	0.0013884	0.0051554	-1.5729
RPS21	0.29409	9.5189	3.0665	0.0037898	0.011752	-2.5108
LRRC49	0.29385	7.4007	3.512	0.0010819	0.004217	-1.3381
FAM110B	0.29384	6.7597	2.7081	0.0097629	0.025213	-3.3805
BATF3	0.29375	7.0076	4.0736	0.00020206	0.0010969	0.25592
C11orf24	0.29342	8.141	4.6179	3.6763e-05	0.00027793	1.8933
MRPL12	0.29332	8.3032	3.1239	0.0032392	0.010341	-2.3651
ARL6IP5	0.29312	9.928	3.0918	0.0035365	0.011106	-2.4466
VMP1	0.29305	9.8783	3.2235	0.0024581	0.0082629	-2.1081
RNF130	0.29275	9.7854	5.6266	1.3874e-06	1.9179e-05	5.0723
PQBP1	0.29172	8.0378	3.1089	0.0033748	0.010692	-2.4032
DFFB	0.29161	5.5475	2.9651	0.0049832	0.014707	-2.764
CDH5	0.29148	8.9904	2.6299	0.011904	0.02962	-3.5605
NEDD4	0.29141	7.8295	2.6751	0.010621	0.02706	-3.4571
FAAP100	0.29111	7.0525	4.0491	0.0002178	0.0011659	0.18421
BLOC1S1	0.29101	9.6091	2.3842	0.021736	0.048471	-4.1009
NUDT9	0.29085	10.101	3.7115	0.00060284	0.0026309	-0.78511
NID1	0.29074	7.2085	2.7386	0.0090297	0.023696	-3.3094
NPM3	0.29069	6.5968	2.7748	0.0082258	0.021947	-3.2243
ITGAE	0.29061	9.4769	4.4487	6.2862e-05	0.00042901	1.3763
SLC29A3	0.29054	7.5153	3.9488	0.00029571	0.001499	-0.10773
PSPC1	0.29021	7.2138	3.8535	0.00039437	0.0018816	-0.382
ZNHIT1	0.28946	10.02	3.1047	0.0034141	0.010799	-2.4139
MAP1S	0.28918	6.531	3.385	0.001559	0.0057045	-1.6818
CDK2AP2	0.28887	7.9808	3.1896	0.0027018	0.0089427	-2.1962
POLR2D	0.28797	6.6065	4.5864	4.0638e-05	0.00030084	1.7966
ODF2	0.28795	5.9126	3.446	0.0013092	0.0049146	-1.5177
EOGT	0.28774	6.1601	2.6397	0.011615	0.029056	-3.5382
AHR	0.28755	8.2774	4.2443	0.00011922	0.00071648	0.76125
B3GAT3	0.28747	7.6078	4.8979	1.4981e-05	0.00013101	2.761
COLGALT1	0.28733	7.7567	4.0555	0.0002136	0.0011481	0.20281
TMEM160	0.28731	6.812	2.3952	0.021171	0.047451	-4.0775
CD40	0.28699	7.3911	4.2661	0.0001114	0.00068007	0.82635
PRPF3	0.28698	7.3705	3.5611	0.00093803	0.0037623	-1.2035
TMEM127	0.28694	9.3336	4.885	1.5616e-05	0.00013554	2.7208
TBC1D12	0.28691	7.4527	3.6978	0.00062772	0.002714	-0.82345
NUP214	0.28679	7.7494	5.1821	5.9573e-06	6.1818e-05	3.6551
TMEM184B	0.28673	8.8053	3.9677	0.00027926	0.0014273	-0.053117
GPC1	0.28659	7.3394	3.7406	0.0005529	0.0024533	-0.70309
TAF12	0.28651	7.198	4.5977	3.9212e-05	0.00029239	1.8311
TBX21	0.28648	6.0593	4.547	4.6067e-05	0.0003333	1.6757
EIF2B5	0.2864	8.7101	2.9425	0.0052938	0.015421	-2.8198
ACTR1A	0.28633	9.3277	5.7406	9.5311e-07	1.4171e-05	5.4382
ST6GALNAC4	0.28633	6.1133	3.5813	0.00088428	0.0036013	-1.1477
RCBTB2	0.28614	9.6711	3.5051	0.001104	0.0042867	-1.3571
MPG	0.28553	8.1429	3.5854	0.00087387	0.0035667	-1.1365
AKR1B1	0.28552	11.333	3.1547	0.0029752	0.0096578	-2.286
ACYP1	0.2855	7.2296	3.1974	0.0026439	0.0087879	-2.176
MAP2K1	0.28547	10.708	4.4252	6.7699e-05	0.00045465	1.3049
ADAR	0.2854	11.587	3.2444	0.002319	0.0078551	-2.0537
DNAJC1	0.28536	8.9114	2.9303	0.0054685	0.015844	-2.8497
ADAM19	0.28487	5.4674	4.3787	7.8352e-05	0.00051278	1.1644
GUK1	0.28478	10.609	5.0569	8.952e-06	8.5381e-05	3.2599
CHMP2A	0.28449	10.188	3.7041	0.00061623	0.0026768	-0.80593
TAF10	0.28445	10.618	3.6657	0.00069021	0.0029281	-0.91336
HSPG2	0.28442	6.0297	3.556	0.00095213	0.0037991	-1.2175
TINAGL1	0.2839	7.5998	4.0097	0.0002457	0.0012854	0.069081
ARID5A	0.28378	6.4073	5.1093	7.5523e-06	7.4804e-05	3.4248
ARRB2	0.28353	6.5877	3.0879	0.0035746	0.0112	-2.4566
DSCC1	0.28346	5.5047	3.3469	0.0017372	0.0062406	-1.7833
NXT1	0.28337	8.6776	4.3535	8.4798e-05	0.00054535	1.0884
ZCCHC2	0.28299	6.3739	2.4312	0.01942	0.044254	-4.0006
PIGC	0.2828	10.224	4.8682	1.6484e-05	0.00014149	2.6684
CYFIP1	0.2824	11.913	5.4282	2.6631e-06	3.2366e-05	4.4376
THOC5	0.28231	8.6978	3.9085	0.00033415	0.0016478	-0.22422
TNFRSF14	0.28182	7.8716	3.4693	0.001224	0.0046534	-1.4544
AGO3	0.28147	5.6473	3.4727	0.0012121	0.0046212	-1.4451
PSMA6	0.28146	12.292	4.1291	0.00017034	0.00095606	0.41932
#N/A	0.28137	10.931	4.2855	0.00010486	0.00064743	0.88438
TMEM208	0.28135	9.1665	4.3891	7.5837e-05	0.00050094	1.1958
RIN3	0.28113	6.7202	4.1182	0.00017616	0.00098279	0.38714
USE1	0.2811	7.7525	3.2596	0.0022224	0.0076144	-2.0139
DR1	0.28079	7.3674	3.6246	0.000779	0.0032308	-1.0279
#N/A	0.28075	8.5363	2.3774	0.022093	0.049065	-4.1154
JADE3	0.28025	7.6744	2.6758	0.010601	0.027032	-3.4554
HDAC1	0.28009	9.8151	4.4697	5.8835e-05	0.00040703	1.44
NKIRAS2	0.27989	8.4842	5.5794	1.6204e-06	2.1593e-05	4.9211
GTPBP4	0.27962	8.6092	4.8505	1.7452e-05	0.00014868	2.6132
DOK3	0.27929	5.5807	3.2526	0.0022664	0.0077239	-2.0323
UBA52	0.27926	11.928	2.8101	0.0075055	0.020367	-3.1405
TNFRSF10C	0.27915	4.965	3.4714	0.0012166	0.0046329	-1.4487
DDX21	0.279	9.4146	3.2968	0.002002	0.0069726	-1.9162
SOAT1	0.27886	6.1229	2.7697	0.0083349	0.022186	-3.2363
FBXL15	0.2786	7.8496	2.9581	0.0050771	0.014927	-2.7813
IFNAR2	0.27847	7.2956	5.5664	1.6913e-06	2.2472e-05	4.8794
PPP3R1	0.27838	6.1223	3.8222	0.00043327	0.0020214	-0.47149
MRPL22	0.27821	8.929	2.5053	0.016221	0.038331	-3.8394
TMBIM1	0.2782	10.88	3.8401	0.00041062	0.0019412	-0.42041
SEMA3F	0.27802	6.9894	4.5947	3.9582e-05	0.0002949	1.822
TIMELESS	0.27761	6.0988	5.2783	4.3513e-06	4.7916e-05	3.9602
SIDT2	0.27756	10.709	3.8662	0.00037964	0.0018264	-0.34578
CORO7	0.27754	6.3944	4.3747	7.9346e-05	0.00051639	1.1523
AK1	0.27745	8.4939	3.4389	0.001336	0.004995	-1.5367
SMARCAL1	0.27602	7.7511	4.4295	6.6787e-05	0.00044918	1.318
P2RX4	0.27597	8.4652	2.6728	0.010681	0.027175	-3.4622
BCL3	0.27596	6.3306	3.4947	0.0011376	0.0043896	-1.3854
PDLIM7	0.27595	6.4757	3.7364	0.00055986	0.0024759	-0.71495
CD244	0.27525	5.7862	4.1781	0.00014643	0.00084965	0.56419
HLA-DRB6	0.27523	7.8585	3.0915	0.0035399	0.011113	-2.4475
ZCCHC24	0.27518	8.607	3.2905	0.0020375	0.0070673	-1.9327
ADGRL2	0.27483	8.5933	2.5903	0.013146	0.032182	-3.6502
PDCD5	0.27465	5.5736	2.4709	0.017641	0.041011	-3.9147
BTAF1	0.27463	8.4424	3.0024	0.0045085	0.013508	-2.6716
IMPDH1	0.27461	8.8248	2.6284	0.011951	0.029714	-3.5641
DEF8	0.2746	8.5615	2.8371	0.0069938	0.019305	-3.0758
PGM3	0.27452	7.2408	3.1114	0.0033515	0.01063	-2.3967
GMPPA	0.27438	7.2512	4.3181	9.4712e-05	0.00059547	0.98216
DCHS1	0.27433	7.2591	2.8304	0.0071168	0.019566	-3.0918
NYNRIN	0.2743	6.9009	3.0152	0.0043548	0.013128	-2.6395
SNRNP70	0.27429	8.8785	3.9535	0.00029152	0.001481	-0.094119
STX6	0.27414	7.0456	4.5294	4.8698e-05	0.0003496	1.6222
MKI67	0.27412	5.4618	3.5237	0.001046	0.0041045	-1.3062
GTF2E2	0.27394	8.9599	4.5753	4.211e-05	0.00030951	1.7623
ULBP2	0.27393	6.1165	3.7515	0.0005353	0.0023891	-0.67238
ZAP70	0.27391	5.2622	4.9314	1.3446e-05	0.00012054	2.8657
SMARCD2	0.27391	8.5511	4.3569	8.3897e-05	0.00054107	1.0987
ARHGAP25	0.27388	8.0357	3.1876	0.0027164	0.0089793	-2.2012
KRT10	0.27385	10.254	4.7058	2.777e-05	0.00021884	2.1641
CSTF2	0.27375	8.0292	4.3315	9.0847e-05	0.00057547	1.0222
GARS	0.27364	10.145	3.7641	0.00051557	0.0023178	-0.63673
CYBRD1	0.27364	6.9937	3.2343	0.0023852	0.0080382	-2.0799
GAS7	0.27335	6.1551	3.2838	0.0020762	0.0071877	-1.9503
C2CD2	0.2733	8.9377	3.0694	0.00376	0.011685	-2.5035
CCT6A	0.27323	9.2424	4.231	0.00012426	0.00073958	0.72152
ZDHHC18	0.2732	7.5633	4.9579	1.234e-05	0.00011225	2.9488
FHL3	0.27319	7.1137	3.3388	0.0017775	0.0063682	-1.8049
NUBP2	0.27234	9.8227	2.8771	0.0062955	0.017743	-2.9793
PPWD1	0.2723	6.7198	3.011	0.0044052	0.01325	-2.6501
IRF2	0.27228	7.2179	2.9577	0.0050825	0.014933	-2.7823
STAT4	0.27193	6.6138	2.6702	0.010754	0.027302	-3.4683
SNRPF	0.27154	7.9341	3.8357	0.00041616	0.0019604	-0.43317
KCTD15	0.27139	7.1647	4.0025	0.00025114	0.0013081	0.048156
SMARCA5	0.27122	8.3254	4.533	4.8148e-05	0.000347	1.6331
YEATS2	0.27108	8.1778	4.1107	0.00018025	0.0010026	0.36519
CHI3L2	0.27091	5.5045	3.5606	0.00093937	0.003766	-1.2048
KIN	0.2707	7.0963	2.3799	0.021961	0.048879	-4.1101
GPN1	0.27052	10.182	3.8519	0.00039632	0.001889	-0.38668
EMID1	0.27042	8.8808	2.5947	0.013004	0.031894	-3.6404
EIF4EBP1	0.2703	7.468	2.9094	0.0057806	0.016554	-2.9008
FKBP3	0.27012	8.7648	3.3825	0.0015702	0.0057317	-1.6885
ING3	0.27005	7.3057	3.1361	0.0031322	0.010072	-2.3338
FYB	0.26998	5.614	6.9803	1.5937e-08	5.2523e-07	9.4354
ATP1A2	0.26995	6.6457	2.8826	0.0062051	0.017536	-2.966
PPID	0.26986	8.8021	3.7436	0.00054795	0.002435	-0.69455
NFE2	0.26968	4.8546	3.7913	0.00047526	0.0021756	-0.55941
LAMTOR2	0.26961	8.0249	3.1221	0.0032547	0.01038	-2.3695
IFNGR1	0.26958	9.9975	2.6677	0.010821	0.027449	-3.474
EIF4G3	0.2694	7.1218	3.5811	0.000885	0.0036016	-1.1485
CYTH4	0.26931	6.7482	4.7101	2.739e-05	0.00021625	2.1774
RTN2	0.26922	7.2953	2.831	0.0071053	0.019554	-3.0903
DUSP7	0.26917	6.8655	3.8246	0.0004302	0.0020091	-0.46471
NUBP1	0.26873	8.5472	3.8044	0.00045708	0.0021123	-0.52233
SYNGR3	0.2684	5.0831	2.4441	0.018824	0.043151	-3.9727
PROS1	0.26839	8.8175	2.4822	0.017164	0.040089	-3.8901
RUVBL2	0.26837	9.7844	2.6485	0.011359	0.028492	-3.518
SELPLG	0.26802	7.1658	4.1584	0.00015562	0.00089183	0.50585
VCPKMT	0.26777	6.6705	3.0495	0.0039685	0.012214	-2.5535
CCNJ	0.26777	5.8272	2.7971	0.0077628	0.020941	-3.1713
PRPF19	0.26764	8.7468	3.8131	0.00044535	0.0020642	-0.49762
CD33	0.26729	5.8218	3.4479	0.0013019	0.0048952	-1.5124
CDK7	0.26717	8.5025	3.5426	0.00099011	0.0039253	-1.2545
GNAI2	0.26712	9.3027	3.5572	0.00094873	0.0037937	-1.2142
SRSF7	0.26708	8.7033	3.7563	0.00052765	0.0023629	-0.65872
NCLN	0.26707	6.6079	3.9038	0.00033896	0.0016653	-0.23784
MIS12	0.26688	8.974	2.8404	0.0069333	0.019184	-3.0678
WDCP	0.26676	6.7963	3.3383	0.0017803	0.0063708	-1.8063
B3GNTL1	0.26627	5.5271	3.2546	0.0022536	0.0076957	-2.027
ATP1B3	0.26624	10.264	3.1511	0.0030048	0.0097264	-2.2952
ME2	0.26611	8.3601	2.4905	0.016817	0.039389	-3.8718
MAK16	0.26582	9.1346	3.5496	0.00097002	0.0038572	-1.2351
TSR3	0.26582	8.2889	2.6778	0.010547	0.026929	-3.4507
ASF1B	0.26552	6.461	2.9696	0.0049231	0.014546	-2.7528
FKBP14	0.26549	6.0401	3.9131	0.00032955	0.0016277	-0.21102
MED6	0.26535	6.0985	3.95	0.00029467	0.0014945	-0.10435
SFPQ	0.26532	8.7142	3.8486	0.00040028	0.001901	-0.39615
TCP11L1	0.26476	6.5032	4.1069	0.0001824	0.0010115	0.35382
ZBED8	0.26466	6.8515	2.3958	0.021142	0.047432	-4.0763
TRAPPC2	0.26462	7.7342	4.1268	0.00017157	0.00096006	0.41243
XPNPEP1	0.26412	9.1651	3.8509	0.00039751	0.0018927	-0.38955
SLC39A7	0.26397	7.4745	2.6621	0.010977	0.027775	-3.487
HLA-F	0.26393	12.659	2.6717	0.010711	0.027236	-3.4647
TXLNA	0.26367	8.2431	2.9217	0.0055954	0.016128	-2.8709
PSMD13	0.26349	9.1666	5.13	7.0588e-06	7.1289e-05	3.4904
ARPC5L	0.26316	9.6821	5.1096	7.544e-06	7.4802e-05	3.4259
JAK1	0.26305	9.9216	3.5282	0.0010324	0.0040669	-1.2939
BCAP31	0.26265	12.287	3.894	0.00034908	0.0017069	-0.26587
LYRM4	0.26251	8.5465	3.4533	0.0012818	0.0048343	-1.4978
TBC1D2	0.26249	5.7657	3.7197	0.00058825	0.0025794	-0.76188
PSMD12	0.26229	9.0763	3.9745	0.00027354	0.0014035	-0.033386
MRPL24	0.26172	10.874	3.0232	0.0042614	0.012897	-2.6194
ARF5	0.2613	9.3086	4.1288	0.0001705	0.0009564	0.4184
KNOP1	0.26103	6.7451	4.0743	0.00020161	0.0010964	0.25805
SMG5	0.26034	7.5113	3.4938	0.0011406	0.0043957	-1.3879
DPM2	0.26022	7.6759	2.8443	0.0068631	0.019035	-3.0585
PHTF1	0.26014	7.0017	2.4766	0.017399	0.040577	-3.9023
TPP2	0.26012	7.4783	4.7435	2.4612e-05	0.000197	2.2808
CLK2	0.25999	9.2382	3.242	0.0023348	0.0078942	-2.06
FKBP1B	0.25979	8.5043	2.6492	0.01134	0.028463	-3.5165
C3orf14	0.25952	7.054	2.7212	0.0094433	0.02454	-3.3502
FANCI	0.25929	5.5835	3.2617	0.0022093	0.0075808	-2.0084
RNF24	0.25919	6.9895	4.248	0.00011786	0.00070922	0.77227
ITPKB	0.25919	6.9904	2.774	0.008241	0.021982	-3.226
MSN	0.25891	10.682	3.7173	0.0005926	0.0025936	-0.76886
PPFIA3	0.25863	6.6727	3.8359	0.00041585	0.0019599	-0.43246
HNRNPM	0.25855	11.548	3.7972	0.000467	0.0021506	-0.54274
GMIP	0.25836	6.1671	3.6971	0.000629	0.002717	-0.82538
EIF2B4	0.25797	9.3092	4.8078	2.0025e-05	0.00016632	2.4802
NOP2	0.25794	8.1101	3.4246	0.0013919	0.0051644	-1.5753
IL16	0.25791	6.1076	3.4933	0.0011422	0.0044001	-1.3892
SUPT20H	0.2579	8.2532	5.1203	7.2862e-06	7.2791e-05	3.4596
STOM	0.25782	11.37	3.0438	0.0040309	0.012357	-2.568
HEXB	0.25746	12.082	3.2524	0.0022677	0.0077239	-2.0328
ASNS	0.25721	8.0417	2.5714	0.013781	0.033514	-3.6928
THOC1	0.25715	8.5516	4.4323	6.6194e-05	0.00044616	1.3266
IL15	0.25705	5.7287	2.5884	0.013209	0.032302	-3.6545
KHDRBS3	0.25678	7.7445	2.6409	0.011579	0.028983	-3.5354
LNPEP	0.2565	4.8681	4.7249	2.6127e-05	0.00020787	2.2231
#N/A	0.25641	9.5688	3.3533	0.0017063	0.0061461	-1.7665
CDK5	0.25616	8.2399	2.9987	0.004553	0.01361	-2.6807
ZWILCH	0.2553	5.8421	4.0121	0.00024386	0.0012766	0.076259
TIMM44	0.25525	7.3491	4.0941	0.00018973	0.0010422	0.31616
FADD	0.25485	8.9205	3.6464	0.00073064	0.0030701	-0.96725
NIP7	0.25483	5.9101	4.3098	9.7203e-05	0.00060829	0.95722
NLRP1	0.2546	5.5385	5.1057	7.64e-06	7.5414e-05	3.4136
GALNT2	0.25458	7.7038	3.4857	0.0011675	0.0044844	-1.4098
SHMT2	0.25358	7.486	2.7453	0.0088767	0.023361	-3.2938
BCL6	0.25286	7.5365	2.4537	0.018395	0.042325	-3.9521
GART	0.25239	6.7442	6.1068	2.8432e-07	5.2347e-06	6.6183
GRN	0.25204	10.67	3.3072	0.0019436	0.0068259	-1.8885
RFC4	0.25202	7.8248	2.5026	0.01633	0.038525	-3.8454
PRR16	0.25172	4.8604	3.1041	0.0034196	0.010807	-2.4154
RAD51D	0.25169	6.4197	3.6728	0.00067585	0.0028804	-0.89344
#N/A	0.2506	10.146	4.1666	0.00015173	0.00087278	0.53009
LRRC8B	0.25031	6.5593	2.6578	0.011096	0.028016	-3.4968
PSENEN	0.25015	8.7797	4.0336	0.00022841	0.001215	0.13876
FASTKD1	0.24996	9.3294	3.1771	0.0027967	0.0091844	-2.2284
YWHAB	0.24977	10.789	5.5362	1.8682e-06	2.435e-05	4.7826
PES1	0.24972	8.2269	3.2503	0.0022809	0.0077576	-2.0382
RNF34	0.24965	9.4686	4.5499	4.5645e-05	0.00033155	1.6846
TCF15	0.24942	5.4812	3.0724	0.0037293	0.011609	-2.4959
RFX5	0.24927	8.8313	3.8154	0.00044228	0.0020531	-0.49106
YIPF1	0.24916	8.9445	3.662	0.00069791	0.0029531	-0.92387
PDGFB	0.24905	7.0326	3.262	0.0022074	0.0075769	-2.0076
ACKR1	0.24888	6.0334	2.9126	0.0057309	0.016462	-2.8929
MAP3K11	0.24859	8.3735	2.8978	0.0059605	0.016959	-2.929
ICAM3	0.24853	8.5452	2.396	0.021131	0.047418	-4.0758
FUT4	0.24838	6.7825	4.5145	5.1057e-05	0.00036428	1.5766
CREB3	0.24834	9.4619	3.4464	0.0013076	0.0049106	-1.5165
MAPK12	0.24834	6.1645	2.6847	0.010364	0.026551	-3.4348
ILK	0.24827	11.266	3.4401	0.0013314	0.0049847	-1.5335
SDCBP	0.24795	12.271	4.2314	0.00012412	0.0007392	0.72263
SNX11	0.2477	10.037	3.6669	0.00068776	0.0029207	-0.90999
CNIH4	0.24759	8.7623	3.1578	0.0029498	0.0095888	-2.278
SIGLEC1	0.24752	5.5863	3.1723	0.0028339	0.0092867	-2.2407
BATF	0.24728	6.4736	2.8032	0.0076415	0.02065	-3.1569
ENTPD6	0.24716	9.3475	2.4934	0.016701	0.039177	-3.8656
NLRP2	0.24708	5.7836	2.406	0.020631	0.046522	-4.0545
YIF1A	0.24705	8.7583	4.0493	0.00021771	0.0011659	0.18464
RAB8A	0.247	10.496	3.6366	0.00075196	0.0031466	-0.99447
SLC37A1	0.24678	6.3737	4.6123	3.7427e-05	0.00028088	1.876
CAP1	0.24665	11.914	3.6932	0.00063641	0.0027426	-0.83648
MUS81	0.24623	8.4352	4.1793	0.00014589	0.00084763	0.56767
DNM1L	0.2461	7.9396	2.9113	0.005752	0.016496	-2.8963
DAPK3	0.24597	5.4784	4.1764	0.00014721	0.00085311	0.5591
ZCCHC6	0.24582	8.3185	3.5856	0.00087343	0.0035667	-1.1361
GINS3	0.24566	6.2271	4.1547	0.00015738	0.0008997	0.49507
VASP	0.24566	6.909	3.7896	0.00047771	0.0021815	-0.56429
ATP13A2	0.24562	7.004	2.9449	0.0052588	0.015355	-2.8137
MOGS	0.24552	7.7906	3.7402	0.00055359	0.0024533	-0.70426
TICAM1	0.24528	5.8125	3.3764	0.0015973	0.0058171	-1.7046
BANP	0.24509	8.3936	3.4387	0.0013367	0.0049957	-1.5372
CD8A	0.24509	6.7545	2.4448	0.018795	0.043116	-3.9713
CDCP1	0.24501	5.4066	2.9629	0.0050121	0.014768	-2.7694
POLG2	0.24497	6.7386	3.7212	0.0005857	0.0025719	-0.75776
PSMD4	0.24493	11.002	3.8447	0.00040495	0.0019206	-0.40719
SLC2A6	0.24477	5.7	3.5616	0.00093667	0.0037595	-1.2021
MYB	0.24468	4.7576	5.4806	2.2427e-06	2.803e-05	4.6047
NPTXR	0.24455	5.5816	3.0471	0.0039946	0.012274	-2.5596
ENTPD7	0.24434	6.0774	4.4669	5.9354e-05	0.0004099	1.4316
TXNL4B	0.24434	7.4531	3.0488	0.003976	0.012233	-2.5553
MRPS17	0.24433	7.8426	3.4814	0.0011821	0.0045261	-1.4215
ZNF143	0.24389	8.1893	3.7113	0.00060311	0.0026309	-0.78552
WDR46	0.24382	7.3015	2.7524	0.0087156	0.023042	-3.2771
RRP7A	0.24381	7.0738	3.3752	0.0016031	0.0058312	-1.708
OSTM1	0.2435	7.6059	2.622	0.012143	0.030086	-3.5785
NPY5R	0.24348	5.3168	3.0677	0.0037774	0.011731	-2.5078
DNAJC2	0.24345	8.495	3.3711	0.001622	0.0058883	-1.719
RPS6KC1	0.2433	8.3079	2.5997	0.012842	0.031564	-3.6291
WDR1	0.24325	10.357	4.5219	4.9883e-05	0.00035673	1.599
FANCE	0.24313	6.7285	3.5849	0.00087515	0.0035704	-1.1379
#N/A	0.24262	10.721	4.085	0.0001951	0.0010679	0.28944
RBCK1	0.24261	8.4201	3.4819	0.0011803	0.0045226	-1.4201
THBS3	0.24253	7.5869	2.6263	0.012014	0.029822	-3.5688
SEC22A	0.24215	6.5819	3.6512	0.00072034	0.0030337	-0.95382
POLR2F	0.24203	8.197	3.7837	0.00048624	0.0022117	-0.58111
NOTCH3	0.24185	6.2625	4.6392	3.4359e-05	0.00026319	1.9585
GNG5	0.24184	8.0334	2.9288	0.0054903	0.015884	-2.8534
DIMT1	0.24174	8.5002	3.581	0.00088513	0.0036016	-1.1486
CARHSP1	0.24141	9.1401	2.7396	0.0090069	0.023657	-3.3071
ZNF35	0.24138	7.192	4.3755	7.9138e-05	0.0005154	1.1548
NOL11	0.24111	9.68	4.0277	0.00023257	0.0012322	0.12154
NXF1	0.24093	9.6551	3.0857	0.0035959	0.011254	-2.4621
DDX50	0.24067	10.512	3.1272	0.0032093	0.010274	-2.3565
ELOVL6	0.24045	6.3527	2.6238	0.012088	0.029963	-3.5743
DEF6	0.24042	6.0796	3.7958	0.00046891	0.0021584	-0.54663
ETV2	0.24025	5.0561	4.1084	0.00018158	0.0010088	0.35816
SNRK	0.24025	10.289	2.5673	0.013922	0.033824	-3.702
SV2A	0.23973	7.0514	3.5262	0.0010383	0.0040812	-1.2993
HSPA14	0.23968	8.2515	3.7912	0.00047548	0.0021756	-0.55985
DERL2	0.23964	9.5642	3.5751	0.00090051	0.0036497	-1.1649
CDC123	0.23946	10.381	4.7601	2.3335e-05	0.00018808	2.3322
#N/A	0.23925	9.6144	4.4987	5.3674e-05	0.00037819	1.5284
NAALADL1	0.23921	6.3198	3.5448	0.00098382	0.003902	-1.2484
KDM7A	0.23901	6.9521	3.4203	0.0014092	0.0052245	-1.5869
NR3C1	0.23894	9.332	2.5381	0.014963	0.0359	-3.7669
ZNF442	0.23894	5.3894	2.3762	0.022152	0.049157	-4.1177
RSU1	0.23893	8.7074	3.4432	0.0013198	0.0049465	-1.5253
MAPK1	0.23891	7.3164	3.5497	0.00096965	0.0038572	-1.2348
BUD31	0.2389	9.24	3.7662	0.00051227	0.0023063	-0.63064
OXLD1	0.23878	8.2734	4.3583	8.3533e-05	0.00053909	1.1028
NSUN3	0.2386	8.2794	3.9042	0.00033851	0.001664	-0.23657
TMEM50A	0.2385	10.926	4.2327	0.00012362	0.00073674	0.72645
EFNA1	0.23843	9.1811	2.8624	0.0065438	0.018314	-3.0148
ZCCHC10	0.23826	6.8582	2.6759	0.0106	0.027032	-3.4552
TIA1	0.23818	7.4938	3.3122	0.0019167	0.0067596	-1.8755
IFFO1	0.23806	9.2523	2.8138	0.0074323	0.020215	-3.1315
REG1A	0.23794	5.6137	2.7475	0.0088263	0.023268	-3.2886
LUC7L3	0.23779	9.6676	2.9768	0.0048286	0.014333	-2.735
EPB41L4A-AS2	0.23769	6.3653	2.4721	0.017589	0.040938	-3.912
CDCA4	0.23768	8.1673	3.5819	0.00088284	0.003597	-1.1462
DGAT1	0.23766	7.7169	2.4278	0.01958	0.044542	-4.0079
NEU1	0.23752	9.128	2.7254	0.0093408	0.024333	-3.3403
ELMO1	0.23731	7.1531	2.5807	0.013464	0.032849	-3.6718
ST3GAL2	0.23716	6.4888	5.095	7.9098e-06	7.7434e-05	3.38
CASP8	0.23715	6.108	3.5855	0.00087346	0.0035667	-1.1361
TRO	0.23709	5.3355	3.0133	0.0043771	0.013183	-2.6442
ITGB1BP1	0.23704	8.4208	2.6853	0.010349	0.02652	-3.4335
ATP6V0B	0.23702	10.796	2.6683	0.010806	0.027424	-3.4727
AP1G2	0.23696	7.5962	3.3226	0.0018612	0.0066091	-1.848
CNPY3	0.23692	7.7644	3.5715	0.00091004	0.0036755	-1.1749
HLA-DQB2	0.23689	6.3796	3.1305	0.0031803	0.010191	-2.348
HSPB3	0.23683	5.8008	3.3668	0.0016419	0.0059467	-1.7304
CDC42EP1	0.23651	7.5178	3.1825	0.0027551	0.0090801	-2.2144
PTTG3P	0.23634	5.1602	3.5803	0.00088696	0.0036075	-1.1506
GIN1	0.23572	7.5672	3.0188	0.0043129	0.013028	-2.6306
HJURP	0.2357	5.5408	2.5528	0.014431	0.034877	-3.7343
FLT3LG	0.23553	5.096	3.8428	0.00040731	0.0019285	-0.41272
SYNGR2	0.23549	10.508	4.4142	7.0079e-05	0.00046792	1.2717
MNT	0.2353	8.5776	2.7288	0.0092607	0.024172	-3.3324
FGD6	0.23469	5.4565	2.9312	0.0054546	0.015815	-2.8474
ZBED5	0.23465	9.8542	3.6551	0.00071224	0.003005	-0.9431
CBFA2T3	0.23456	5.7351	2.5044	0.016255	0.038382	-3.8413
TTI2	0.23437	7.7727	3.7889	0.0004788	0.0021832	-0.56645
TRAF2	0.23425	6.9984	3.7613	0.00051987	0.0023337	-0.64461
BLK	0.23397	4.8634	3.302	0.0019725	0.0068959	-1.9023
EMC8	0.23339	9.1349	3.7821	0.0004886	0.0022192	-0.5857
AHSA1	0.23335	10.468	3.7934	0.00047227	0.0021663	-0.5534
WDR25	0.23335	7.1243	2.4601	0.018108	0.041831	-3.9381
MORC2	0.23265	7.5436	2.8667	0.0064706	0.018164	-3.0045
RFC2	0.23256	6.456	4.8962	1.5062e-05	0.00013159	2.7558
SPI1	0.23241	5.3808	4.151	0.00015921	0.00090847	0.48401
MYO9B	0.23199	6.9096	5.3804	3.1155e-06	3.6662e-05	4.285
TRNAU1AP	0.23181	6.9392	3.5579	0.00094674	0.003789	-1.2122
PPP1R13B	0.23149	6.98	2.4022	0.020822	0.046883	-4.0627
HAUS2	0.23148	5.9765	3.1798	0.0027763	0.0091369	-2.2216
GABPB1	0.23112	6.7479	3.736	0.00056058	0.0024769	-0.71617
CCDC94	0.23111	7.7288	3.0404	0.0040679	0.012433	-2.5764
KLHL7	0.23087	5.4142	4.7862	2.1465e-05	0.00017608	2.413
#N/A	0.23087	10.252	3.8161	0.00044129	0.0020516	-0.48892
ZNF350	0.23084	6.4914	2.6111	0.012482	0.030768	-3.6033
COL13A1	0.23062	6.1126	4.2867	0.0001045	0.0006456	0.88773
TMEM268	0.23005	5.6564	2.5389	0.014934	0.035848	-3.7652
HMBS	0.22971	8.2115	2.9795	0.0047941	0.01424	-2.7283
DCPS	0.22967	7.8457	3.1794	0.0027788	0.0091419	-2.2224
#N/A	0.2292	10.603	2.8646	0.0065069	0.018239	-3.0096
DYRK4	0.22898	8.1855	3.2561	0.0022442	0.007675	-2.0231
PNO1	0.22882	8.2896	2.7871	0.007967	0.021399	-3.1951
CD180	0.22879	5.3877	3.2552	0.0022499	0.0076888	-2.0254
EML3	0.22865	7.3137	3.9131	0.00032955	0.0016277	-0.211
MAGOH	0.22857	8.4902	2.9579	0.0050795	0.014929	-2.7817
MOB1A	0.22857	9.078	2.4614	0.018053	0.041744	-3.9353
TTC31	0.22851	8.2289	2.9721	0.0048899	0.014468	-2.7466
RAD54B	0.22833	5.387	3.2969	0.002001	0.006972	-1.9158
FEN1	0.22823	6.7345	3.0352	0.0041257	0.012564	-2.5895
CD2BP2	0.22765	9.2187	4.8379	1.8176e-05	0.00015305	2.5739
PAK2	0.22764	8.7773	3.6918	0.00063906	0.0027502	-0.84042
MIOS	0.22759	8.5088	3.5229	0.0010482	0.0041116	-1.3082
PTS	0.22751	10.087	3.0058	0.0044673	0.013411	-2.6631
STMN3	0.22736	5.5243	2.9585	0.0050715	0.014915	-2.7802
AP3M2	0.22714	9.9715	2.5533	0.014414	0.034853	-3.7332
#N/A	0.2269	11.432	4.1823	0.00014452	0.00084017	0.57674
COPS5	0.22683	10.71	2.9567	0.0050967	0.01497	-2.7848
#N/A	0.22677	11.572	4.6696	3.1177e-05	0.00024182	2.0524
PCGF1	0.22677	8.3808	4.6302	3.5357e-05	0.0002695	1.9309
IGKV4-1	0.2266	5.4982	2.4838	0.017094	0.039977	-3.8865
ZNF276	0.2264	6.5165	4.076	0.00020054	0.0010931	0.26314
ZNF133	0.22623	7.644	2.4604	0.018097	0.041815	-3.9375
DUSP10	0.22621	6.3784	2.4988	0.016481	0.038798	-3.8537
NTM	0.22615	5.2937	2.9614	0.0050331	0.014816	-2.7732
VANGL1	0.22549	7.1866	2.4912	0.016788	0.039331	-3.8703
TXNDC15	0.22536	10.656	3.8778	0.00036655	0.0017782	-0.31236
SPATS2	0.22529	6.145	3.2355	0.0023772	0.0080164	-2.0768
AP4M1	0.22507	8.1287	2.8304	0.0071177	0.019566	-3.0919
#N/A	0.22503	10.638	3.5202	0.0010565	0.0041408	-1.3157
NCBP1	0.22477	5.5323	3.4496	0.0012957	0.004878	-1.5079
PUS3	0.22454	7.3426	2.8301	0.0071233	0.019571	-3.0926
ATF7IP	0.22451	8.3399	2.6911	0.010198	0.026176	-3.4201
RPL28	0.22383	8.3782	3.4733	0.0012102	0.0046161	-1.4437
GEMIN2	0.22362	6.2689	3.0669	0.0037851	0.011748	-2.5097
GIT2	0.22333	6.4846	4.6023	3.8641e-05	0.00028882	1.8452
SURF2	0.22329	6.9469	2.4777	0.017352	0.040488	-3.8999
ZNF816	0.22324	8.3168	2.8672	0.0064627	0.018148	-3.0034
CDCA3	0.22315	6.5242	2.9748	0.0048552	0.014393	-2.74
ENSA	0.22314	9.8291	4.5603	4.4161e-05	0.00032254	1.7164
IKBKB	0.22291	6.9224	4.9566	1.2391e-05	0.0001125	2.9448
TTI1	0.22251	7.0743	3.5304	0.0010257	0.0040438	-1.2878
ADARB1	0.22236	6.7083	3.9449	0.00029926	0.0015136	-0.11909
GNA12	0.2223	8.2197	2.8594	0.0065955	0.018442	-3.022
TMED9	0.22215	11.521	3.0879	0.0035749	0.0112	-2.4567
GPR107	0.22212	8.4282	2.859	0.0066033	0.018458	-3.0231
LDLRAD4	0.22206	6.3453	3.2504	0.0022801	0.0077576	-2.0379
TMEM243	0.22204	8.5608	3.0934	0.003521	0.011085	-2.4426
PSMD7	0.2219	10.111	3.2216	0.0024714	0.0083047	-2.1131
MFSD13A	0.2218	6.2751	3.4452	0.0013119	0.0049228	-1.5196
METTL3	0.22154	9.5729	2.8207	0.0073004	0.019926	-3.1151
FKBP15	0.22143	8.7711	5.0689	8.6098e-06	8.2885e-05	3.2977
TMEM185B	0.22108	7.5952	2.4835	0.01711	0.040001	-3.8873
NUCB2	0.22099	9.3671	2.5198	0.015654	0.037286	-3.8075
DUSP22	0.22095	10.507	4.0148	0.0002419	0.001269	0.08395
TBC1D31	0.22052	5.68	2.8795	0.0062556	0.017652	-2.9734
FBL	0.2205	10.13	2.4347	0.019256	0.043934	-3.993
SMC6	0.22017	6.9962	2.5006	0.01641	0.03866	-3.8498
NUP107	0.22	8.9996	3.01	0.0044169	0.013281	-2.6526
RAG1	0.21979	4.7602	3.4396	0.0013333	0.0049888	-1.5348
ALG3	0.21961	8.5418	2.7923	0.0078607	0.021181	-3.1828
CSE1L	0.21933	9.4503	3.757	0.00052661	0.0023594	-0.65685
RPS6KB2	0.21923	7.0387	2.8659	0.006485	0.018194	-3.0065
CSNK1E	0.21922	6.5939	2.4709	0.017643	0.041011	-3.9148
COPE	0.21917	9.4647	2.8527	0.0067131	0.018703	-3.0382
TUBA1C	0.21894	12.287	2.4734	0.017536	0.040836	-3.9093
RAD54L	0.21878	5.6319	3.8171	0.00043994	0.0020474	-0.48601
P2RY2	0.21858	5.9655	2.7344	0.0091281	0.0239	-3.3193
ZSCAN9	0.21849	7.5299	3.1783	0.0027876	0.0091581	-2.2253
SPTLC2	0.21841	7.428	2.6533	0.011222	0.02824	-3.507
#N/A	0.21818	11.84	4.2617	0.00011294	0.00068675	0.81319
LUC7L	0.21812	7.666	2.9199	0.0056208	0.016191	-2.875
EMC3	0.21791	9.8675	3.2442	0.0023206	0.0078577	-2.0543
UXT	0.21751	10.312	3.3511	0.0017165	0.0061808	-1.7721
#N/A	0.21749	9.025	2.3707	0.022444	0.049691	-4.1294
TIPIN	0.21746	5.9358	2.5164	0.015784	0.037516	-3.8149
SNRNP35	0.21738	8.5926	2.649	0.011345	0.028466	-3.5169
HEATR6	0.21727	7.2088	3.6383	0.00074824	0.0031369	-0.98978
RNFT1	0.21719	5.1235	3.9201	0.00032265	0.0015996	-0.19086
#N/A	0.21716	9.1947	3.3053	0.0019543	0.0068522	-1.8936
ATP2A3	0.21714	6.4169	2.898	0.0059571	0.016959	-2.9285
ARMC9	0.21705	5.5505	3.3966	0.0015082	0.0055469	-1.6507
KIF2A	0.21704	7.4486	3.3948	0.0015158	0.0055617	-1.6554
YKT6	0.21662	7.8658	4.3829	7.7307e-05	0.00050793	1.1773
MFSD1	0.21657	10.96	2.7172	0.0095385	0.024744	-3.3593
DPP3	0.21651	8.2617	2.6911	0.010196	0.026176	-3.42
PGS1	0.21642	8.7001	3.5	0.0011201	0.0043294	-1.3708
GPR176	0.21622	6.1599	2.381	0.021901	0.048792	-4.1076
CIAPIN1	0.21594	9.4804	4.1644	0.00015275	0.00087645	0.5237
SPOUT1	0.21573	7.346	4.0293	0.00023141	0.0012286	0.12633
GPKOW	0.21567	9.2168	3.3889	0.0015416	0.0056429	-1.6712
HS3ST2	0.21556	6.0368	2.5205	0.015627	0.037241	-3.8059
SGTA	0.21481	7.6289	3.2165	0.002507	0.0083939	-2.1265
SP140	0.21426	4.6855	3.338	0.0017816	0.0063725	-1.807
P3H3	0.21422	5.8186	2.746	0.0088601	0.02333	-3.2921
USB1	0.21398	7.5603	4.2996	0.00010037	0.00062577	0.92643
PSMA4	0.21388	10.129	3.5001	0.0011199	0.0043294	-1.3707
#N/A	0.21361	10.052	2.372	0.022375	0.049562	-4.1267
SCARB1	0.21329	6.2404	3.3292	0.0018267	0.0065065	-1.8304
#N/A	0.21317	8.6015	3.4802	0.0011861	0.0045371	-1.4247
EDRF1	0.21296	6.7152	2.3782	0.022048	0.04899	-4.1136
PSME1	0.2127	11.935	3.0053	0.0044733	0.013424	-2.6643
RAB27A	0.21203	7.5964	2.4402	0.019002	0.043441	-3.9811
IQGAP1	0.21177	9.6782	3.1714	0.0028415	0.0093086	-2.2432
LPCAT4	0.21168	6.7821	3.09	0.0035546	0.011151	-2.4514
PTPRCAP	0.21143	6.492	2.7211	0.0094439	0.02454	-3.3503
SIVA1	0.21101	8.2987	2.8141	0.0074266	0.020205	-3.1308
DENND5A	0.21099	9.9382	3.4377	0.0013408	0.0050068	-1.5401
LAMA4	0.21084	5.6912	3.4711	0.0012177	0.0046334	-1.4495
ARFGAP1	0.21071	7.6997	2.9032	0.0058761	0.016769	-2.9159
NEK3	0.21066	6.4579	3.3212	0.0018686	0.0066276	-1.8516
OAZ2	0.21051	9.9345	3.2936	0.0020199	0.0070192	-1.9246
B4GALT7	0.21022	7.357	4.023	0.00023593	0.0012443	0.10783
LIMD2	0.21022	6.0704	3.7909	0.00047588	0.0021756	-0.56064
EMC9	0.21022	8.6238	2.5769	0.013594	0.033118	-3.6805
MTPAP	0.21009	7.122	2.4151	0.020187	0.045721	-4.0351
BMP2K	0.20962	5.5264	3.1684	0.0028649	0.0093718	-2.2508
CARD9	0.20947	6.5849	2.545	0.01471	0.035471	-3.7515
ARHGAP17	0.20945	9.2369	2.564	0.014036	0.034065	-3.7093
CSNK1G2	0.20943	6.9586	3.5728	0.00090664	0.0036649	-1.1713
CD160	0.20939	5.4531	2.6661	0.010865	0.027544	-3.4777
DDX52	0.20921	7.4052	3.093	0.0035253	0.011093	-2.4437
FAM53C	0.20911	8.6151	3.9167	0.00032592	0.001613	-0.20046
CNTNAP1	0.20879	6.9926	3.2078	0.0025684	0.0085776	-2.149
LRRN2	0.20879	7.1806	2.5409	0.014863	0.035743	-3.7609
#N/A	0.20856	10.943	3.0295	0.0041897	0.012721	-2.6037
MFSD5	0.20848	9.4386	3.4526	0.0012846	0.0048419	-1.4998
PRPF18	0.2084	8.1497	2.8267	0.0071874	0.019705	-3.1008
ARHGAP26	0.20839	5.5086	4.3788	7.8309e-05	0.00051278	1.1649
HAUS3	0.20811	7.0864	2.541	0.014859	0.035742	-3.7606
DPF2	0.2079	9.3397	2.4642	0.017932	0.041519	-3.9293
GSTP1	0.20778	10.084	2.6002	0.012825	0.031538	-3.6279
FBXO5	0.20771	5.4607	2.6744	0.010639	0.027083	-3.4586
XPO1	0.20757	11.042	2.8675	0.0064574	0.018138	-3.0026
CD27	0.20754	5.6206	2.9897	0.0046645	0.013899	-2.703
IFNAR1	0.2074	7.9185	2.3954	0.021163	0.047445	-4.0772
RAP1GDS1	0.20736	8.7742	2.6525	0.011246	0.028286	-3.5089
RNASEH2B	0.20733	6.2589	2.3746	0.022236	0.049312	-4.1211
ALG9	0.20722	8.2147	3.4168	0.0014235	0.0052731	-1.5964
FKBP10	0.20719	7.1411	3.4926	0.0011445	0.0044071	-1.3911
PHLDA3	0.20689	7.9322	2.7494	0.0087831	0.023174	-3.2841
CPOX	0.20687	6.6309	3.0362	0.0041149	0.012536	-2.5871
HECA	0.20677	9.5395	2.6602	0.011028	0.027866	-3.4912
ITGA7	0.20664	6.8699	3.1489	0.0030232	0.0097689	-2.3009
PIK3R5	0.2066	6.3749	3.5627	0.00093363	0.0037511	-1.199
NCAPG2	0.20657	6.571	2.6199	0.012207	0.030202	-3.5832
HTATIP2	0.20656	8.85	3.1875	0.0027174	0.0089793	-2.2016
NUP37	0.20645	9.1631	2.8381	0.0069754	0.019278	-3.0734
SLC8B1	0.20636	7.0989	4.2717	0.0001095	0.00067112	0.84287
SYTL2	0.20636	5.7188	2.4021	0.020827	0.046884	-4.0629
TBL2	0.20628	9.6312	3.0401	0.004071	0.012434	-2.5771
ADAMTS2	0.20604	5.6301	3.877	0.00036751	0.001781	-0.31487
SHFM1	0.20598	6.5867	3.5349	0.0010123	0.0040014	-1.2754
ANGPTL2	0.20573	6.2849	3.6276	0.00077208	0.0032092	-1.0195
FASTKD5	0.20573	8.4554	3.1194	0.0032793	0.010451	-2.3765
CMKLR1	0.20568	5.5899	3.7776	0.00049515	0.0022434	-0.59835
TRMU	0.20556	7.1425	2.4287	0.019537	0.044465	-4.0059
TNFAIP2	0.20514	8.1537	3.6153	0.00080064	0.0033028	-1.0538
ZNF562	0.20511	6.781	2.8654	0.006493	0.018205	-3.0076
DENND4B	0.20501	8.5742	3.0201	0.0042979	0.012991	-2.6273
MAP4K2	0.205	6.1263	2.6258	0.012028	0.02984	-3.5699
CBX4	0.20495	5.9163	3.6039	0.00082789	0.0033985	-1.0855
KNTC1	0.20487	5.5757	3.569	0.0009166	0.0036987	-1.1816
SLC12A8	0.20477	5.226	2.8074	0.007557	0.020476	-3.1468
ZNF197	0.2047	5.5361	3.1654	0.0028886	0.0094163	-2.2585
THUMPD2	0.20462	7.2754	3.2933	0.0020216	0.0070198	-1.9253
RPL13A	0.20461	13.56	2.9286	0.0054926	0.015886	-2.8538
PLEKHF1	0.20454	7.1589	3.5498	0.00096938	0.0038572	-1.2345
ARL6IP4	0.20434	9.9149	2.4685	0.017743	0.041204	-3.9198
SEPW1	0.20433	11.488	3.6455	0.00073258	0.0030754	-0.96976
TRIOBP	0.20411	9.4051	3.5687	0.00091754	0.0037009	-1.1826
SIGLEC9	0.20372	5.4653	3.4867	0.0011641	0.0044752	-1.4071
RRP9	0.20356	7.3356	3.1732	0.0028269	0.0092671	-2.2384
UBE2K	0.2035	9.0441	3.8127	0.00044588	0.0020642	-0.49876
MGAT4B	0.20346	9.1171	2.4928	0.016724	0.039202	-3.8669
SIN3B	0.20327	7.7638	2.7566	0.008622	0.02282	-3.2672
PHF11	0.20308	10.623	2.7364	0.0090802	0.023802	-3.3145
MGST2	0.20285	10.689	3.1191	0.0032821	0.010456	-2.3773
LRRK1	0.20277	6.0872	3.9288	0.00031422	0.001567	-0.16562
HSPA4	0.20274	7.0762	2.9274	0.0055106	0.015928	-2.8568
KXD1	0.20271	8.8083	3.2741	0.002134	0.0073578	-1.976
BNIP1	0.2027	6.5426	3.9305	0.00031264	0.0015608	-0.1608
MKNK1	0.2027	8.7313	3.3553	0.0016966	0.0061185	-1.7612
SLC7A6	0.20265	5.982	3.8649	0.00038116	0.0018328	-0.34958
CHN1	0.20247	9.7945	2.6545	0.011189	0.028167	-3.5044
PMM2	0.20239	7.5889	2.5372	0.014996	0.03596	-3.7689
DSN1	0.20223	5.0679	3.7687	0.00050853	0.0022951	-0.62367
WDR76	0.2016	4.6987	3.8384	0.00041277	0.0019504	-0.42539
PPT1	0.20144	11.43	3.3386	0.0017785	0.0063692	-1.8054
#N/A	0.20138	8.8405	4.3121	9.6507e-05	0.00060552	0.96413
TIMM8B	0.20127	9.29	2.6604	0.011023	0.027861	-3.4908
NDUFS5	0.20122	9.8667	2.5228	0.015539	0.037099	-3.8009
NELFB	0.20107	8.8177	2.5557	0.014329	0.034692	-3.7279
TLDC1	0.20104	6.8067	3.1367	0.0031271	0.010063	-2.3323
IGHV3-7	0.20087	5.6453	3.7604	0.00052127	0.0023378	-0.64717
PSMB4	0.20081	11.627	3.9263	0.00031665	0.0015766	-0.17296
RPS3	0.20039	12.857	2.4874	0.016948	0.039664	-3.8787
CYP2R1	0.19981	5.5049	4.5474	4.6001e-05	0.0003332	1.6771
ZNF692	0.19981	6.9802	2.4082	0.020522	0.046344	-4.0498
PHTF2	0.19977	5.4829	3.855	0.00039267	0.0018764	-0.3779
#N/A	0.19968	9.8367	3.5096	0.0010895	0.0042394	-1.3447
APBA3	0.19955	6.9038	2.6898	0.010231	0.02624	-3.4231
PSME3	0.19935	8.3804	3.3098	0.0019297	0.0067924	-1.8818
SDF2	0.19903	9.5859	3.0344	0.0041347	0.012586	-2.5915
VSIG10	0.19898	7.0712	3.2051	0.0025878	0.0086269	-2.156
MAP1LC3C	0.19896	5.0633	3.2737	0.0021363	0.0073605	-1.977
IK	0.19826	11.207	2.8317	0.0070927	0.019526	-3.0887
CTDNEP1	0.19803	7.2243	2.6242	0.012077	0.029945	-3.5735
PUM3	0.198	8.4324	2.51	0.016034	0.037979	-3.829
SAP30	0.19797	5.5977	3.8697	0.00037562	0.0018109	-0.33565
CCDC130	0.19787	7.701	2.83	0.007124	0.019571	-3.0927
NVL	0.19764	7.1139	3.5241	0.0010447	0.0041012	-1.3051
CENPN	0.19747	5.5157	3.6853	0.00065148	0.0027894	-0.85866
SMG8	0.19723	8.8238	2.8047	0.0076118	0.020582	-3.1534
CHST11	0.1972	6.1225	2.8425	0.0068945	0.019105	-3.0627
PITPNM1	0.1971	7.0477	2.9053	0.0058431	0.016707	-2.9107
TNNI2	0.19699	5.3545	3.2074	0.0025715	0.0085818	-2.1501
LARP7	0.19697	8.8368	2.5557	0.014328	0.034692	-3.7278
ORC5	0.19682	5.7308	4.4541	6.1805e-05	0.00042335	1.3926
VRK2	0.19676	8.0581	2.7625	0.0084912	0.022552	-3.2533
APBB1IP	0.19623	5.6933	2.9044	0.0058577	0.016743	-2.913
HOXB5	0.19612	7.4957	2.6678	0.010819	0.027449	-3.4738
ATAD3A	0.1959	7.4176	2.8395	0.0069498	0.019224	-3.07
DDX47	0.19576	11.328	3.8262	0.00042816	0.0020036	-0.46019
TRABD	0.19574	6.1174	3.7894	0.00047798	0.0021817	-0.56483
UBAC1	0.19554	8.9087	3.4657	0.0012369	0.004685	-1.4642
ADRM1	0.19542	8.9878	2.5835	0.01337	0.032643	-3.6654
ZNF202	0.19522	6.7633	3.3595	0.0016764	0.0060504	-1.7499
#N/A	0.19501	8.1879	3.6787	0.00066432	0.0028391	-0.87715
LMO4	0.19482	6.1779	2.9683	0.0049402	0.014589	-2.756
RBM22	0.19458	9.2363	2.4611	0.018064	0.04176	-3.9359
FUS	0.19444	7.4047	2.81	0.007506	0.020367	-3.1406
HUS1	0.19428	6.6304	3.7332	0.00056514	0.0024935	-0.72386
PCID2	0.1941	8.9337	3.104	0.0034204	0.010807	-2.4156
METTL4	0.19399	7.4784	2.4904	0.016823	0.039393	-3.8721
RHOF	0.19399	6.2804	2.4556	0.01831	0.042171	-3.948
LINC00963	0.19386	5.4984	3.6206	0.0007883	0.0032591	-1.0391
IL1RN	0.19359	5.9633	3.7921	0.00047419	0.0021719	-0.55727
TMEM223	0.19359	9.372	2.6838	0.010388	0.026584	-3.4369
PFKFB4	0.19346	5.808	3.8805	0.00036367	0.0017661	-0.30485
KIFC3	0.19345	7.4304	3.1533	0.0029869	0.0096889	-2.2897
PWP1	0.1934	9.1595	3.0017	0.0045168	0.013524	-2.6733
CREB5	0.19324	5.394	2.5139	0.015881	0.037664	-3.8204
GALNT6	0.19313	4.9312	3.6354	0.00075459	0.0031521	-0.99777
NRBP1	0.19299	8.5853	3.9765	0.00027186	0.0013972	-0.027504
PTAFR	0.19289	6.047	3.7007	0.00062231	0.0026956	-0.81524
AKAP17A	0.19287	6.8966	3.0128	0.0043839	0.013199	-2.6457
BLM	0.19193	6.2356	2.4249	0.019718	0.044801	-4.0141
MRPL33	0.19189	10.133	2.9547	0.0051238	0.015016	-2.7897
RCC1	0.19179	6.4793	4.5872	4.0544e-05	0.00030051	1.7989
ETS1	0.19177	7.3702	2.7369	0.0090704	0.023783	-3.3135
C19orf66	0.19171	8.9719	2.3882	0.021532	0.048107	-4.0925
SLC11A1	0.1917	5.4727	3.5775	0.00089427	0.003634	-1.1583
SKI	0.19162	5.956	2.4229	0.019814	0.044997	-4.0185
LTC4S	0.1916	6.5509	2.6503	0.011309	0.028407	-3.514
INHBA	0.19151	5.0479	2.7318	0.0091883	0.024024	-3.3253
DGUOK	0.19124	8.5682	3.1067	0.003395	0.010745	-2.4087
CTC1	0.19118	7.4468	2.9964	0.004582	0.013688	-2.6865
YIPF3	0.19102	9.2318	2.7696	0.0083368	0.022186	-3.2365
GM2A	0.19101	7.5553	3.1709	0.0028452	0.0093172	-2.2444
HNRNPH3	0.19089	9.3335	2.6828	0.010414	0.026635	-3.4392
SIDT1	0.19087	4.6656	2.783	0.0080515	0.021557	-3.2047
PNPLA6	0.19071	8.5286	2.7204	0.0094628	0.024575	-3.3521
ARF4	0.19063	11.61	3.1634	0.0029051	0.0094601	-2.2638
GPR63	0.19052	4.9362	2.8485	0.0067884	0.018868	-3.0485
MRPL11	0.19025	8.0858	3.1041	0.0034199	0.010807	-2.4155
TMEM39A	0.19022	7.7538	2.9302	0.0054697	0.015844	-2.8499
DUSP4	0.19014	5.2303	3.0453	0.0040141	0.01231	-2.5641
DENND4A	0.19011	5.6247	2.8337	0.007057	0.019445	-3.0841
HPRT1	0.18982	9.8941	2.5037	0.016285	0.038443	-3.843
RBM5	0.18976	9.3035	3.1336	0.003154	0.010132	-2.3403
AP5Z1	0.18968	6.2221	3.0946	0.0035098	0.011063	-2.4396
IRF3	0.18942	7.8936	2.8773	0.0062925	0.01774	-2.9789
PPP1R12A	0.18938	7.6185	3.1739	0.002822	0.0092545	-2.2368
LFNG	0.18888	6.1579	3.7151	0.00059632	0.0026062	-0.7748
SH3GL1	0.18882	8.3411	2.6294	0.011918	0.029647	-3.5616
RET	0.18863	5.5021	3.8963	0.00034673	0.001699	-0.25944
H2AFY2	0.18832	8.6876	3.3322	0.0018111	0.0064584	-1.8224
RAB33A	0.18794	5.023	3.3195	0.0018772	0.0066559	-1.856
POLR2G	0.18784	11.296	3.6111	0.00081052	0.0033405	-1.0654
DNMT3A	0.18743	6.9724	3.8359	0.00041579	0.0019599	-0.43233
TGFB2	0.18709	4.8226	3.4862	0.0011657	0.0044797	-1.4084
PCDHB13	0.187	5.936	2.3951	0.021177	0.047451	-4.0777
IKBKAP	0.18686	7.3549	3.0245	0.0042471	0.012866	-2.6163
SEC13	0.1866	11.32	3.2395	0.0023507	0.0079388	-2.0664
CAPN1	0.18653	7.7088	2.5369	0.015008	0.03598	-3.7696
KIAA0930	0.18632	8.1699	3.2319	0.0024013	0.0080866	-2.0862
PDCD4-AS1	0.18627	5.3396	2.8156	0.007398	0.020152	-3.1273
ANGPT2	0.18625	4.7437	2.4341	0.019284	0.043988	-3.9943
CD63	0.18607	12.973	3.2463	0.0023068	0.0078226	-2.0488
TMEM104	0.18595	7.6138	2.5782	0.01355	0.033022	-3.6775
#N/A	0.18567	10.131	4.1969	0.00013813	0.00080811	0.62007
#N/A	0.18565	6.8943	2.3701	0.022475	0.049735	-4.1306
NAGA	0.18551	8.6671	3.3455	0.0017442	0.0062608	-1.7871
SRRT	0.18548	8.5765	3.1528	0.0029909	0.0096963	-2.2909
#N/A	0.18502	9.9263	3.108	0.0033829	0.010714	-2.4054
CPSF1	0.18492	6.525	2.8153	0.0074031	0.020159	-3.1279
F2RL2	0.18475	4.8705	4.3118	9.6612e-05	0.00060577	0.96308
EIF3I	0.18466	10.551	2.4587	0.018171	0.041925	-3.9412
#N/A	0.18419	9.3234	2.383	0.0218	0.04859	-4.1035
PIK3CD	0.18414	6.2682	2.8844	0.0061753	0.017468	-2.9616
NOL7	0.18409	10.083	2.7363	0.0090836	0.023804	-3.3148
CASP6	0.18378	7.0245	2.6954	0.010087	0.025927	-3.4102
NLRP3	0.18338	5.3247	3.0664	0.0037905	0.011752	-2.511
CDC34	0.18293	7.7281	2.6909	0.010202	0.02618	-3.4205
PSMB7	0.18288	11.149	2.7091	0.0097381	0.02517	-3.3782
CROCC	0.18285	5.9404	2.4435	0.018851	0.04319	-3.974
WDR3	0.1828	8.4957	3.0804	0.0036481	0.011387	-2.4755
PPAN	0.18256	7.1994	2.6805	0.010476	0.026763	-3.4446
POP5	0.18224	9.4531	2.8529	0.0067101	0.018701	-3.0378
C14orf169	0.18207	8.4744	3.1639	0.002901	0.0094499	-2.2625
CDK4	0.18203	10.169	2.4615	0.018047	0.041741	-3.935
CCDC86	0.18196	7.9	2.6844	0.010372	0.026555	-3.4355
ATR	0.18193	7.64	2.5225	0.015551	0.037108	-3.8015
#N/A	0.18156	7.5995	3.9802	0.00026881	0.0013869	-0.016755
ATP6V0D1	0.18122	11.056	2.4701	0.017677	0.04108	-3.9165
HDAC7	0.18116	7.2344	2.864	0.0065175	0.018263	-3.0111
ACTC1	0.18116	5.9075	2.8045	0.0076147	0.020584	-3.1537
FKBPL	0.18094	7.139	2.5702	0.013822	0.033605	-3.6954
RRBP1	0.18086	8.0351	3.1841	0.0027428	0.009046	-2.2103
SLC35C1	0.18067	6.9948	3.9025	0.00034026	0.0016708	-0.24149
ANXA11	0.18062	9.1452	3.1803	0.0027723	0.0091271	-2.2202
ELAC2	0.18057	8.5449	2.824	0.0072375	0.019801	-3.1072
POLG	0.18045	7.0254	3.2411	0.0023403	0.00791	-2.0622
#N/A	0.18006	10.962	3.0285	0.0042007	0.012747	-2.6062
CDC27	0.18004	7.7931	2.8978	0.0059604	0.016959	-2.929
TTLL12	0.17998	7.7936	2.7892	0.0079234	0.021312	-3.1901
MCTS1	0.17997	9.3577	2.823	0.0072566	0.019836	-3.1096
KLRD1	0.17996	5.7743	2.9459	0.0052459	0.015326	-2.8114
UPK1A	0.17995	6.2054	2.542	0.014821	0.035679	-3.7583
DOLK	0.17981	8.5778	2.6457	0.011439	0.028648	-3.5244
FAM105A	0.1798	5.2643	2.9739	0.0048675	0.014416	-2.7424
CCL13	0.17977	5.8615	2.5088	0.016081	0.03806	-3.8317
TNFSF9	0.17965	5.1613	3.1834	0.0027486	0.009062	-2.2122
LRP8	0.17953	5.4355	3.3668	0.0016417	0.0059467	-1.7303
RRAS	0.17938	10.902	2.4633	0.017971	0.041596	-3.9312
IL27RA	0.1793	5.6532	2.6551	0.011171	0.028136	-3.5029
NFKB2	0.17914	5.683	3.5748	0.00090141	0.0036505	-1.1659
SS18L2	0.17906	9.0282	3.0971	0.0034855	0.010994	-2.4332
TBC1D30	0.17889	5.1142	3.0945	0.0035111	0.011064	-2.4399
SCARF1	0.17859	5.1018	2.4016	0.020852	0.046927	-4.0639
FTSJ1	0.17857	8.2361	3.4263	0.0013853	0.0051482	-1.5708
HP	0.17845	5.0542	2.9915	0.0046423	0.013837	-2.6986
NDUFAF7	0.17803	5.1987	3.2936	0.0020196	0.0070192	-1.9244
PFDN6	0.17765	7.7475	2.7251	0.0093491	0.024341	-3.3411
RNPEP	0.17759	9.6317	2.4598	0.018124	0.041846	-3.9388
MVD	0.17737	6.7355	2.97	0.0049184	0.014538	-2.752
HMGA1	0.17714	5.4807	2.5447	0.014722	0.035486	-3.7523
PCSK7	0.17672	8.8187	3.0615	0.0038413	0.011878	-2.5233
LAT2	0.1767	6.3042	3.1966	0.0026495	0.0088011	-2.178
CAPZB	0.17615	10.252	2.6278	0.011968	0.029743	-3.5653
SQRDL	0.17589	12.106	2.7123	0.0096606	0.024998	-3.3709
REM1	0.17555	6.6239	2.4385	0.019081	0.0436	-3.9848
CNNM4	0.17542	6.8985	3.0557	0.0039022	0.012038	-2.5379
ANP32B	0.1745	11.042	2.9038	0.0058664	0.016753	-2.9144
ZNF22	0.17425	9.3795	3.0556	0.0039038	0.012039	-2.5383
#N/A	0.17392	9.7122	3.0868	0.0035855	0.011226	-2.4594
TYK2	0.17384	9.3402	3.2846	0.0020714	0.0071741	-1.9481
AQR	0.17359	8.2675	3.0171	0.0043324	0.013082	-2.6347
SMOX	0.17359	6.5721	2.7821	0.0080711	0.021597	-3.2069
#N/A	0.17227	7.4266	3.445	0.0013128	0.0049228	-1.5202
EXOSC4	0.17209	8.2156	2.9846	0.0047292	0.014078	-2.7157
SETDB1	0.17156	7.6845	3.5661	0.00092436	0.0037204	-1.1896
SNTB1	0.17152	6.3762	2.5621	0.0141	0.034202	-3.7134
UBE2E1	0.17148	10.705	2.4315	0.019408	0.044237	-4
#N/A	0.17114	8.2624	2.7311	0.0092049	0.024054	-3.3269
MGAT2	0.17109	7.5789	2.6194	0.012224	0.030236	-3.5845
IL1R1	0.17105	7.1679	2.8718	0.0063841	0.017965	-2.9921
DHRS7	0.17076	10.222	2.7184	0.0095101	0.024677	-3.3566
NUDC	0.17076	10.569	2.552	0.01446	0.034934	-3.7361
KLHL18	0.17038	8.0193	2.7904	0.007899	0.021265	-3.1872
#N/A	0.17032	8.2248	3.1169	0.0033017	0.010504	-2.3828
BRAP	0.17025	6.9486	3.1914	0.0026882	0.0089135	-2.1915
NCAPH	0.17013	5.9659	2.6748	0.010628	0.027063	-3.4577
USP36	0.16978	5.7826	2.4718	0.017601	0.040945	-3.9126
COMMD3	0.16965	10.272	4.0012	0.00025213	0.0013125	0.044423
#N/A	0.16933	10.326	2.3887	0.021502	0.048053	-4.0913
EPHB4	0.16917	7.1884	2.3799	0.021961	0.048879	-4.1101
FANCF	0.16916	8.1837	2.6562	0.011142	0.028092	-3.5005
NOC4L	0.16914	7.4778	2.5623	0.014095	0.034199	-3.7131
ECD	0.16888	8.0535	2.4831	0.017124	0.040016	-3.888
DAZAP1	0.16875	7.3065	2.4425	0.018897	0.043255	-3.9762
PAF1	0.16866	8.6375	2.4741	0.017505	0.040803	-3.9077
GRK2	0.16781	6.7699	3.2911	0.0020339	0.0070572	-1.931
CNPY2	0.16764	9.18	2.4208	0.019913	0.0452	-4.0229
DHX8	0.16755	7.9749	2.9294	0.0054808	0.015867	-2.8518
EXOC1	0.16753	9.6194	2.9123	0.0057361	0.016472	-2.8937
XRCC4	0.16733	5.5353	2.9004	0.0059206	0.016866	-2.9228
IL12RB1	0.16729	6.2946	3.3461	0.0017415	0.0062536	-1.7857
TSPAN14	0.16688	9.2429	2.4363	0.019185	0.043815	-3.9897
FBXO22	0.1668	5.5334	3.4003	0.0014923	0.0054953	-1.6408
ZNF783	0.1668	7.4423	2.8461	0.0068301	0.018966	-3.0541
#N/A	0.16655	9.1796	4.0861	0.00019441	0.0010647	0.29284
DDX19A	0.16562	7.1823	3.2729	0.0021409	0.0073733	-1.979
PCGF3	0.16523	6.6178	2.7696	0.0083358	0.022186	-3.2364
RAB23	0.16495	6.3124	2.5101	0.01603	0.037979	-3.8288
SCUBE2	0.16484	5.3957	2.6991	0.009991	0.025702	-3.4015
CALM3	0.16472	8.676	2.9651	0.0049826	0.014707	-2.7639
GABRE	0.16471	5.0242	3.4607	0.001255	0.0047419	-1.4779
SIGMAR1	0.16471	7.6235	2.8358	0.0070167	0.019351	-3.0788
RAD51C	0.16449	7.54	2.9839	0.0047377	0.014094	-2.7174
RALGDS	0.16446	7.198	2.4144	0.020221	0.045786	-4.0366
SP100	0.16433	7.1239	2.4594	0.018139	0.041871	-3.9396
EIF2S1	0.16413	8.8651	3.0502	0.0039617	0.012197	-2.5519
#N/A	0.16408	8.7525	2.5108	0.016003	0.037933	-3.8273
PSME4	0.16401	7.8568	3.3282	0.0018318	0.0065198	-1.8331
ALG13	0.164	6.8437	2.7809	0.008097	0.02166	-3.2099
BBC3	0.16394	6.6241	2.3703	0.022468	0.049731	-4.1303
MAPK14	0.16388	7.1779	3.1501	0.0030135	0.0097514	-2.2979
BET1	0.16315	9.0463	2.6283	0.011952	0.029714	-3.5641
LPAR2	0.16288	6.4703	2.5046	0.016249	0.038378	-3.841
TAP2	0.1627	6.8514	2.6176	0.012279	0.030349	-3.5886
XPO4	0.16266	6.2316	2.8251	0.0072172	0.019763	-3.1046
EIF4G1	0.16264	7.7321	2.6483	0.011365	0.028492	-3.5185
ZNF79	0.16238	5.8715	2.3987	0.020998	0.047165	-4.0702
UIMC1	0.16235	9.1629	2.6395	0.01162	0.029062	-3.5386
ASB6	0.16197	7.7096	3.0485	0.0039795	0.012236	-2.5561
#N/A	0.16178	11.181	2.4005	0.020905	0.047027	-4.0662
PITPNA	0.1616	9.5514	3.0756	0.0036969	0.011516	-2.4878
TANK	0.16139	7.2319	2.8126	0.0074564	0.020274	-3.1345
CNTRL	0.16133	6.1318	3.2555	0.0022481	0.0076852	-2.0246
#N/A	0.16129	9.291	2.524	0.015495	0.037003	-3.7983
QPCTL	0.16076	5.4603	2.9221	0.0055885	0.016118	-2.8697
LIG3	0.16068	6.6386	2.6082	0.012572	0.030974	-3.6099
PSMD2	0.16064	10.962	3.0633	0.0038223	0.01183	-2.5187
AIP	0.16027	9.0195	3.337	0.0017867	0.0063837	-1.8097
USP32	0.16008	6.0148	2.7933	0.0078391	0.021129	-3.1803
#N/A	0.16006	9.4286	3.0808	0.0036445	0.01138	-2.4746
EWSR1	0.15975	5.8299	3.0327	0.0041534	0.012636	-2.5957
SETX	0.1597	8.5586	2.5802	0.013483	0.032876	-3.673
LAIR2	0.15936	4.8691	2.8922	0.0060499	0.017181	-2.9427
KDM5A	0.15859	7.3905	3.0828	0.0036247	0.011325	-2.4695
GEMIN7	0.15841	6.5641	3.4532	0.0012821	0.0048343	-1.498
#N/A	0.15833	7.6561	3.5355	0.0010105	0.0039976	-1.2737
GRWD1	0.15693	7.9885	2.5529	0.014427	0.034875	-3.7341
FCHO1	0.15684	5.598	2.5359	0.015047	0.036055	-3.772
POLR2H	0.15675	9.5672	2.5802	0.01348	0.032876	-3.6728
BLMH	0.15641	8.7857	2.5615	0.014123	0.034238	-3.7148
PRPSAP1	0.15601	10.142	2.8757	0.0063193	0.017804	-2.9827
DUS2	0.15559	7.5428	3.1681	0.0028674	0.0093736	-2.2517
[truncated: 2,190 more rows]
